# Supplementary material for: Deciphering the preeclampsia-specific immune microenvironment and the role of pro-inflammatory macrophages at the maternal–fetal interface
Source: eLife journal article supplement (doi:10.7554/elife.100002), 2024-09-11
Supplement: fig2-data1 [file figure 2 B.xls]

## Sheet: Sheet1
NP	PE	GDM	GDM&PE
7.28969	24.4987	6.63261	5.89334
5.93584	12.2301	7.62307	6.19326
5.36249	8.25165	8.7246	35.9713
2.85585	10.2447	6.14795	18.4317
5.38919	12.5535	14.7662	8.59224
15.2598	10.6956	6.20009	6.41549
3.62786	10.9462	12.8447	7.55742
5.93442	10.3143	10.2857
4.66703
