# Supplementary material for: Deciphering the preeclampsia-specific immune microenvironment and the role of pro-inflammatory macrophages at the maternal–fetal interface
Source: eLife journal article supplement (doi:10.7554/elife.100002), 2024-09-11
Supplement: fig2-data1 [file figure 2 G.xls]

## Sheet: Sheet1
NP	PE	GDM	GDM&PE
3.31748	27.459	14.8552	6.34983
5.29865	21.301	9.79694	8.17247
2.16972	4.06091	7.08771	44.769
1.30583	9.41288	4.21668	32.2505
2.83156	10.826	17.5557	12.8367
9.4914	16.4334	2.56091	2.31031
4.28055	30.8461	19.9496	2.917
4.77692	9.44203	3.03723
3.90681
