# Supplementary material for: Deciphering the preeclampsia-specific immune microenvironment and the role of pro-inflammatory macrophages at the maternal–fetal interface
Source: eLife journal article supplement (doi:10.7554/elife.100002), 2024-09-11
Supplement: fig2-data1 [file figure 2 H.xls]

## Sheet: Sheet1
PD-1					TIGIT
NP	PE	GDM	GDM&PE		NP	PE	GDM	GDM&PE
0.148747	0.134081	0.0951315	0.159355		0.0776028	0.0466035	0.0614892	0.0928598
0.248455	0.0476116	0.107164	0.0562337		0.187806	0.0774438	0.093878	0.0870494
0.165475	0.137205	0.0871382	0.0643964		0.145474	0.0750687	0.0830516	0.123434
0.0989483	0.103058	0.102417	0.0425837		0.0654696	0.112887	0.0862604	0.0705681
0.219717	0.12503	0.126104	0.0613997		0.25328	0.109178	0.0503998	0.0662471
0.131787	0.0883892	0.308041	0.207313		0.0937305	0.094466	0.143161	0.221168
0.154857	0.0743889	0.157524	0.106996		0.135403	0.0683937	0.159524	0.0659423
0.124005	0.152026	0.163515			0.10419	0.120989	0.124525
0.192553					0.229026
