# Supplementary material for: Deciphering the preeclampsia-specific immune microenvironment and the role of pro-inflammatory macrophages at the maternal–fetal interface
Source: eLife journal article supplement (doi:10.7554/elife.100002), 2024-09-11
Supplement: fig2-figsupp1-data1 [file Figure 2-figure supplement 1 F.xls]

## Sheet: Sheet1
TIM3
NP	PE	GDM	GDM&PE
0.0170051	0	0.046762	0.0335683
0.0212849	0.0081649	0.00434741	0.0902612
0.0209502	0.020549	0.0144794	0.00647594
0.0347016	0	0.0113865	0.0196836
0.022766	0.0214316	0.0167079	0.00731039
0.0363718	0.0103725	0.0378062	0.0380312
0.015901	0.00831519	0.0424793	0.0113759
0.0225538	0.00135113	0.0367014
0.0360428
