# Supplementary material for: Deciphering the preeclampsia-specific immune microenvironment and the role of pro-inflammatory macrophages at the maternal–fetal interface
Source: eLife journal article supplement (doi:10.7554/elife.100002), 2024-09-11
Supplement: fig4-data1 [file figure 4 G.xls]

## Sheet: SBP
	D10.5	D16.5		D10.5	D16.5		D10.5	D16.5		D10.5	D16.5
C1	103.333	107	PLX1	105.167	106.083	M2-1	105.625	105.854	M1-1	105.74	105.797
C2	107	104	PLX2	105.5	104.75	M2-2	105.125	104.938	M1-2	105.031	104.984
C3	105	106.333	PLX3	105.667	106	M2-3	105.833	105.917	M1-3	105.875	105.896
C4	102.333	107.667	PLX4	105	106.333	M2-4	105.667	106	M1-4	105.833	105.917
C5	106.667	108.667	PLX5	107.667	108.167	M2-5	107.917	108.042	M1-5	107.979	108.01
C6	103.333	103.333	PLX6	103.333	103.333	M2-6	103.333	103.333	M1-6	103.333	103.333
C7	104	106.667	PLX7	105.333	106	M2-7	105.667	105.833	M1-7	105.75	105.792
C8	108	103	PLX8	105.5	104.25	M2-8	104.875	104.562	M1-8	104.719	104.641

## Sheet: UACR
C1	22.7377		PLX1	45.9032		M2-1	21.8849		M1-1	59.2674
C2	15.5848		PLX2	33.0383		M2-2	17.0175		M1-2	51.7814
C3	46.7106		PLX3	41.8074		M2-3	25.6839		M1-3	30.4396
C4	21.8461		PLX4	59.6556		M2-4	25.4319		M1-4	68.5097
C5	35.2225		PLX5	39.7643		M2-5	41.521		M1-5	42.3248
C6	30.4339		PLX6	41.5535		M2-6	30.6516		M1-6	35.5724
C7	23.6253		PLX7	36.0648		M2-7	39.0104		M1-7	30.1964
C8	16.4972		PLX8	27.0489		M2-8	37.5707		M1-8	53.705
