# Supplementary material for: Deciphering the preeclampsia-specific immune microenvironment and the role of pro-inflammatory macrophages at the maternal–fetal interface
Source: eLife journal article supplement (doi:10.7554/elife.100002), 2024-09-11
Supplement: fig4-data1 [file figure 4 H.xls]

## Sheet: SBP
CD44+ CD4+ IL-17A+ T cells (%)
Control	PLX3397	anti-inflam Mø	pro-inflam Mø
12.73	20	17.78	25.6
13.5	28.63	21.46	26.59
16.71	16.44	17.4	24.01
15.26	26.04	14.78	22.92
23.26	23.53	13.81	19.63
19.98	27.06	17.59	21.48
17	23.65	14.24	28.29
18.68	18.59	20.56	28.22
CD11b+ Gr-1+ Granulocytes (%)
Control	PLX3397	anti-inflam Mø	pro-inflam Mø
70.44	41.69	61.57	49.12
60.63	50.74	63.5	63.29
65.25	44.6	70.79	57.34
68.85	59.61	66.12	58.1
73.27	50.14	67.63	56.98
61.14	55.18	64.89	49.22
69.63	65.12	62.7	58.4
57.67	66.38	67.98	52.22
CD44+ CD8+ T cells (%)
Control	PLX3397	anti-inflam Mø	pro-inflam Mø
71.25	84.21	69.17	78.67
72.3	88.79	76.6	78.54
78.41	76.64	72.47	80.39
76.95	84.01	74.75	81.28
67.6	82.17	70.53	79.31
80.57	73.53	74.78	79.28
68.43	73.16	60	78.08
75.87	78.68	60.61	83.26
