# Supplementary material for: Deciphering the preeclampsia-specific immune microenvironment and the role of pro-inflammatory macrophages at the maternal–fetal interface
Source: eLife journal article supplement (doi:10.7554/elife.100002), 2024-09-11
Supplement: fig4-figsupp1-data1 [file Figure 4-figure supplement 1 C.xls]

## Sheet: D16.5 SBP
Control	RUPP
109	113
103	109
107	116
105	113
106	107
102	106
108	110
105	115
105	106

## Sheet: UACR
Control	RUPP
27.2684	60.9304
43.2775	18.8672
46.6578	52.923
38.8477	61.9591
37.1524	70.8194
14.7568	50.0397
51.8109	56.9923
48.6422	40.5292
32.8956	57.0168
