# Supplementary material for: Deciphering the preeclampsia-specific immune microenvironment and the role of pro-inflammatory macrophages at the maternal–fetal interface
Source: eLife journal article supplement (doi:10.7554/elife.100002), 2024-09-11
Supplement: fig4-figsupp1-data1 [file Figure 4-figure supplement 1 D.xls]

## Sheet: Embryo absorption rate (%)
Control	PE derived macrophages
0	11.1111
16.6667	30
0	25
0	40
0	50
0	20

## Sheet: Crown-rump of pups (mm)
Control	PE derived macrophages
15.6	16.6
15.7	15.6
15.8	16
14.3	16.3
15.6	16.8
16.5	17
16	16.5
16.3	16.8
16.9
	15.6
19.1	16
17.6	15.3
18.5	15.5
17.5	14.9
18	15.8
	16
18.5
19	19
17.9	17.8
18.3	18.1
18.5	13.4
18.7	17.9
19.3	18.3
19.5	16.5
19	19
18.5	17.5
19.3
18.4	17.2
17.9	17.5
17.5	17
17.8	17.3
18.5	16.9
17.9	17.1
18.5	17.3
17.5	16.5
18	16.9
18.3	17
18.7	17.2
18	17.3
17.9
17.9
18.1
17.5
18
18.5
18.3
17.7
18.2

## Sheet: Body weigh of pups (g)
Control	PE derived macrophages
0.762	0.804
0.711	0.781
0.953	0.868
0.837	0.837
0.643	0.863
0.798	0.706
0.83	0.842
0.706	0.925
0.779
	0.822
0.928	0.711
1.106	0.753
1.001	0.801
1.103	0.78
0.98	0.891
	0.803
0.832
0.932	1.182
0.953	0.993
0.941	1.017
0.881	0.983
0.939	1.018
0.894	1.023
1.025	0.976
1.123	0.761
0.902	0.694
0.991
0.923	0.769
0.954	0.717
0.918	0.744
0.972	0.802
1.083	0.765
1.046	0.781
0.933	0.81
1.2	0.811
1.123	0.721
1.013	0.744
0.918	0.771
0.887	0.767
0.931
0.938
1.13
1.096
0.993
0.917
1.071
1.101
0.925
