# Supplementary material for: Deciphering the preeclampsia-specific immune microenvironment and the role of pro-inflammatory macrophages at the maternal–fetal interface
Source: eLife journal article supplement (doi:10.7554/elife.100002), 2024-09-11
Supplement: fig4-figsupp1-data1 [file Figure 4-figure supplement 1 E.xls]

## Sheet: D16.5 SBP
Control	RUPP
103.667	112
106.667	117.333
103.333	113
104.667	116.333
105.667	114.667
104	115.667

## Sheet: UACR
Control	RUPP
14.4002	39.6511
13.743	49.8597
22.0481	39.3687
33.2163	31.1818
15.1752	26.4057
22.1428	47.0762
