# Supplementary material for: Deciphering the preeclampsia-specific immune microenvironment and the role of pro-inflammatory macrophages at the maternal–fetal interface
Source: eLife journal article supplement (doi:10.7554/elife.100002), 2024-09-11
Supplement: fig4-figsupp2-data1 [file Figure 4-figure supplement 2 B.xls]

## Sheet: Embryo absorption rate (%)
C1	16.7		Lipo1	3.7		M2-1	15.3		M1-1	17.5
C2	19.2		PLX2	5.2		M2-2	14.5		M1-2	14.3
C3	15.6		PLX3	3.2		M2-3	17.3		M1-3	15.6
C4	13.2		PLX4	2.1		M2-4	14.2		M1-4	13.9
C5	12.4		PLX5	7.6		M2-5	15.3		M1-5	13.4
C6	13.2		PLX6	3.3		M2-6	16.4		M1-6	14.2
C7	14.5		PLX7	4.2		M2-7	14.8		M1-7	14.7
C8	16		PLX8	3.5		M2-8	13.2		M1-8	15.5
