# Supplementary material for: Deciphering the preeclampsia-specific immune microenvironment and the role of pro-inflammatory macrophages at the maternal–fetal interface
Source: eLife journal article supplement (doi:10.7554/elife.100002), 2024-09-11
Supplement: fig4-figsupp2-data1 [file Figure 4-figure supplement 2 D.xls]

## Sheet: SBP
	D10.5	D16.5		D10.5	D16.5		D10.5	D16.5		D10.5	D16.5
C1	103.333	103.667	MD1	103.667	109	MD+M1 1	104.333	113.667	MD+M2 7	103.333	103.667
C2	103.667	106.333	MD2	105.667	109.667	MD+M1 2	103.333	114.333	MD+M2 8	106.333	104.667
C3	106.667	103.333	MD3	106.333	107.333	MD+M1 3	105	116.667	MD+M2 9	106	102.667
C4	105.667	107	MD4	103.667	108	MD+M1 4	106.667	116	MD+M2 10	104	105.667
C5	104	104.333	MD5	105	107	MD+M1 5	102.667	113	MD+M2 11	105.333	106.667
C6	107	105	MD6	103	107.333	MD+M1 6	103.667	114.667	MD+M2 12	106.667	104.667

## Sheet: UACR
C1	14.033		MD1	38.9582		MD+M1 1	73.0793		MD+M2 7	26.1961
C2	14.6265		MD2	30.9213		MD+M1 2	45.7027		MD+M2 8	23.9895
C3	28.6723		MD3	64.8131		MD+M1 3	51.3013		MD+M2 9	14.3538
C4	31.8549		MD4	42.9316		MD+M1 4	35.577		MD+M2 10	36.5088
C5	28.9229		MD5	26.3403		MD+M1 5	52.5181		MD+M2 11	25.7661
C6	8.71373		MD6	56.8633		MD+M1 6	36.7947		MD+M2 12	37.3633
