# Supplementary material for: Deciphering the preeclampsia-specific immune microenvironment and the role of pro-inflammatory macrophages at the maternal–fetal interface
Source: eLife journal article supplement (doi:10.7554/elife.100002), 2024-09-11
Supplement: fig4-figsupp2-data1 [file Figure 4-figure supplement 2 E.xls]

## Sheet: SBP
CD44+ CD4+ IL-17A+ T cells (%)
Control	Loposomes	Loposomes+AT M2	Loposomes+AT M1
17.15	25.1	15.4	22.6
13.07	24.17	22.37	14.39
15.84	16.26	13.18	23.17
11.76	21.56	19.93	28.38
15.92	20.81	12.7	22.81
14.76	25.79	13.31	21.68
CD11b+ Gr-1+ Granulocytes (%)
Control	Loposomes	Loposomes+AT M2	Loposomes+AT M1
26.95	14.01	25.72	19.91
23.68	20.37	24.78	18.17
15.23	19.85	17.75	15.53
25.98	14.4	20.34	17.11
18.54	23.79	22.21	20.23
20.23	15	31.05	17.03
CD44+ CD8+ T cells (%)
Control	Loposomes	Loposomes+AT M2	Loposomes+AT M1
66.26	72.21	64.76	86.76
72.07	76.46	75	74.8
63.17	85	67.02	68.99
64.61	76.89	63.57	78.08
64.68	73.24	73.58	79.44
65.54	74	66.21	75.91
