# Supplementary material for: Deciphering the preeclampsia-specific immune microenvironment and the role of pro-inflammatory macrophages at the maternal–fetal interface
Source: eLife journal article supplement (doi:10.7554/elife.100002), 2024-09-11
Supplement: fig6-data1 [file figure 6 F.xls]

## Sheet: SBP
CD4+CD44+ T cells (%)
NP	PE
46.13	69.41
54.78	59.53
64.29	71.04
54.17	62.95
45.69	52.5
51.65	68.8
54.16	61.68
55.13	62.99
57.36	48
CD4+CD44+IL-17A+ T cells (%)
NP	PE
6.28	16.42
10.52	18.53
7.22	17.38
3.64	16.28
13.1	28.22
10.25	21.99
17.56	15.11
10.87	18.45
8.9	15.49
CD4+CD44+Foxp3+ T cells (%)
NP	PE
19.52	8.9
12.37	11.58
21.35	12.67
16.4	14.04
15.73	14.41
14.41	6.12
14.71	13.79
16.85	12.3
12.98	8.9
