# Supplementary material for: Deciphering the preeclampsia-specific immune microenvironment and the role of pro-inflammatory macrophages at the maternal–fetal interface
Source: eLife journal article supplement (doi:10.7554/elife.100002), 2024-09-11
Supplement: fig6-data1 [file figure 6 G.xls]

## Sheet: Embryo absorption rate (%)
Control	NP-CD4	PE-CD4
0	0	37.5
0	0	40
0	0	14.2857
0	0	12.5
14.2857	0	16.6667
0	14.2857	12.5

## Sheet: Crown-rump of pups (mm)
Control	NP-CD4	PE-CD4
19.2	17.7	17.9
18.4	17.3	18
19.3	16.9	17.6
18.5	18.8	17.7
19	18.3	17.7
	18.3
19.1	17.9	18.8
19	18.1	18.3
18.1	18	17.5
18.8
18.1	18	16.9
17.2	18.6	16
18	17.9	16.9
16.7	18.2	16.7
17.3	18.4	17.1
17.4	18.3	17
18.1	17.7
	18	18
18.2		18.6
17.9	18.7	18.4
19.3	19.7	17.7
18.2	18.9	17.9
17.3	18.8	18.3
18.5	19.3	18.1
17.7	18.5
18	19	18.6
		17.6
17.2	18.5	17.8
18.5	18.3	17.3
17.8	18	18.1
18.4	18
18	18.6	18
18	18.2	17.5
	18.4	17.5
18.7		18
18.5	18.8	16.5
16.9	19	17.6
18.1	18.5	17.4
17.6	18.5
19.1	18.4
	18
18.6	18.7
18.2	18.6
17.5	18.2
18.5
18.3	18.2
18.5	18
18.2	16.8
17.3	18.7
	18.5
	18.3

## Sheet: Body weigh of pups (g)
Control	NP-CD4	PE-CD4
1.056	0.899	0.905
1.069	0.902	0.88
1.1	0.871	0.919
1.05	1.07	0.74
0.974	0.908	0.986
	0.915
1.001	0.909	0.904
1.002	0.906	0.871
0.866	0.881	0.859
0.917
0.791	1.056	0.877
0.97	0.992	0.888
1.088	1.186	0.924
0.904	1.074	0.862
1.057	1.11	0.91
0.958	1.08	0.892
0.981	1.131
	0.956	0.823
1.048		0.941
0.924	1.137	0.912
1.102	1.041	0.906
0.987	1.071	0.986
0.977	1.123	0.897
0.955	0.952	0.974
1.093	0.982
0.968		1.023
	1.103	0.888
1.002	1.054	1.029
1.033	1.1	1.005
0.941	0.972	0.946
0.951	1.077
0.962	0.914	0.878
0.98	1.03	0.851
		0.904
0.892	0.996	0.979
1.003	0.961	0.788
0.711	1.096	0.891
0.824	0.92	0.851
0.995	1
1.038	0.981
	1.03
0.918	1.016
1.001	0.696
0.913
0.875	0.961
0.981	1.084
0.941	0.912
1.028	0.901
1.03	1.023
	0.948
