# Supplementary material for: Deciphering the preeclampsia-specific immune microenvironment and the role of pro-inflammatory macrophages at the maternal–fetal interface
Source: eLife journal article supplement (doi:10.7554/elife.100002), 2024-09-11
Supplement: fig6-data1 [file figure 6 H.xls]

## Sheet: SBP
	D10.5	D16.5		D10.5	D16.5		D10.5	D16.5
C1	102.667	107.333	NP-CD4 1	106.667	104	PE-CD4 1	106	112.333
C2	107	104	NP-CD4 2	104.333	107.333	PE-CD4 2	106.667	118
C3	104.333	103.333	NP-CD4 3	107	105.333	PE-CD4 3	105	115.333
C4	106	106.667	NP-CD4 4	105.667	105.667	PE-CD4 4	105.667	114.667
C5	102.667	103	NP-CD4 5	105	105.667	PE-CD4 5	103.333	114
C6	104.667	102.333	NP-CD4 6	102.333	102.667	PE-CD4 6	102.667	116.667

## Sheet: UACR
C1	29.7786		NP-CD4 1	28.9958		PE-CD4 1	34.4309
C2	20.4017		NP-CD4 2	21.9877		PE-CD4 2	59.5594
C3	23.5488		NP-CD4 3	40.5916		PE-CD4 3	71.86
C4	27.609		NP-CD4 4	25.0163		PE-CD4 4	40.2582
C5	41.8489		NP-CD4 5	15.3286		PE-CD4 5	34.458
C6	35.0548		NP-CD4 6	35.8721		PE-CD4 6	36.0739
