# Supplementary material for: Deciphering the preeclampsia-specific immune microenvironment and the role of pro-inflammatory macrophages at the maternal–fetal interface
Source: eLife journal article supplement (doi:10.7554/elife.100002), 2024-09-11
Supplement: fig6-figsupp1-data1 [file Figure 6-figure supplement 1 D.xls]

## Sheet: Frequencies
CD44+ CD4+ T cells (%)			CD44+ CD4+ IL-17A+ T cells (%)
Pregnancy history of NP	Pregnancy history of PE		Pregnancy history of NP	Pregnancy history of PE
46.13	69.41		6.28	16.42
54.78	59.53		10.52	18.53
64.29	71.04		7.22	17.38
54.17	62.95		3.64	16.28
45.69	52.5		13.1	28.22
51.65	68.8		10.25	21.99
54.16	61.68		17.56	15.11
55.13	62.99		10.87	18.45
57.36	48		8.9	15.49
