# Supplementary material for: Deciphering the preeclampsia-specific immune microenvironment and the role of pro-inflammatory macrophages at the maternal–fetal interface
Source: eLife journal article supplement (doi:10.7554/elife.100002), 2024-09-11
Supplement: fig6-figsupp1-data1 [file Figure 6-figure supplement 1 E.xls]

## Sheet: D16.5 SBP
Pregnancy history of NP	Pregnancy history of PE
103.667	113.333
102.333	124.667
106.333	127
105.333	126
106.667	120.667
105	107.333
105.667	124.333
105.333	124.667
105	126

## Sheet: UACR
Pregnancy history of NP	Pregnancy history of PE
20.5673	22.5635
36.3638	48.609
42.6988	33.8413
23.9043	31.847
13.2148	27.6396
25.1316	34.231
41.0643	66.3642
17.7416	56.926
24.3302	36.7492
