# Supplementary material for: Deciphering the preeclampsia-specific immune microenvironment and the role of pro-inflammatory macrophages at the maternal–fetal interface
Source: eLife journal article supplement (doi:10.7554/elife.100002), 2024-09-11
Supplement: fig6-figsupp2-data1 [file granulocyte Diffgene.xls]

## Sheet: 0
p_val	avg_logFC	pct.1	pct.2	p_val_adj	gene	cluster		source	term_name	term_id	highlighted	adjusted_p_value	negative_log10_of_adjusted_p_value	term_size	query_size	intersection_size	effective_domain_size	intersections
2.88381e-79	0.824353	0.73	0.458	5.71138e-75	Fos	0		GO:MF	protein binding	GO:0005515	TRUE	0.000505144	3.29658	10460	42	33	25063	FOS,BTG2,IL1R2,CDK2AP2,MPP7,CSF3R,DUSP1,EGR1,H2-Q10,JAML,FXYD5,H3F3B,CXCR4,CD300C2,CYTIP,TNFAIP2,LSP1,CCPG1,CDC42EP3,CST3,JUND,TSPAN13,EMD,FAU,UCP2,ANKRD11,CD300LD,VPS37B,SSH2,FEM1C,CCR1,RPL37,RPL17
1.43002e-162	0.794255	0.98	0.869	2.83215e-158	Btg2	0		GO:MF	RNA polymerase II core promoter sequence-specific DNA binding	GO:0000979	TRUE	0.00267916	2.572	22	42	3	25063	FOS,EGR1,H3F3B
6.60357e-57	0.782533	0.451	0.231	1.30784e-52	Hist1h1c	0		GO:MF	cytokine receptor activity	GO:0004896	TRUE	0.00695167	2.15791	92	42	4	25063	IL1R2,CSF3R,CXCR4,CCR1
2.36432e-150	0.778448	0.968	0.791	4.68254e-146	Il1r2	0		GO:MF	binding	GO:0005488	FALSE	0.0137933	1.86033	16378	42	39	25063	FOS,BTG2,IL1R2,CDK2AP2,FOSB,MPP7,CSF3R,DUSP1,COQ10B,EGR1,STK17B,H2-Q10,JAML,FXYD5,H3F3B,CXCR4,CD300C2,YPEL3,CYTIP,TNFAIP2,PLA2G7,LSP1,CCPG1,ZFP36L2,CDC42EP3,CST3,JUND,TSPAN13,EMD,FAU,UCP2,ANKRD11,CD300LD,VPS37B,SSH2,FEM1C,CCR1,RPL37,RPL17
1.73215e-81	0.744223	0.759	0.549	3.43052e-77	Cdk2ap2	0		GO:MF	immune receptor activity	GO:0140375	FALSE	0.027805	1.55588	131	42	4	25063	IL1R2,CSF3R,CXCR4,CCR1
4.13155e-57	0.737287	0.419	0.204	8.18253e-53	Fosb	0		GO:MF	core promoter sequence-specific DNA binding	GO:0001046	FALSE	0.0291915	1.53474	48	42	3	25063	FOS,EGR1,H3F3B
2.27682e-80	0.727357	0.574	0.273	4.50925e-76	Mpp7	0		GO:MF	cytokine binding	GO:0019955	FALSE	0.0380167	1.42003	142	42	4	25063	IL1R2,CSF3R,CXCR4,CCR1
5.14051e-145	0.71659	0.942	0.736	1.01808e-140	Csf3r	0		GO:BP	positive regulation of biological process	GO:0048518	TRUE	0.00941063	2.02638	6589	47	26	26944	FOS,BTG2,FOSB,MPP7,DUSP1,EGR1,STK17B,H2-Q10,JAML,CXCR4,CD300C2,YPEL3,PLA2G7,CCPG1,ZFP36L2,CDC42EP3,CST3,JUND,EMD,UCP2,VPS37B,SSH2,CCR1,RPL37,RPL17,SIRPB1B
1.4517e-67	0.71651	0.465	0.224	2.87509e-63	Hist1h2bc	0		GO:BP	regulation of biological process	GO:0050789	FALSE	0.00980619	2.0085	13144	47	38	26944	FOS,BTG2,IL1R2,CDK2AP2,FOSB,MPP7,CSF3R,DUSP1,FGL2,EGR1,STK17B,H2-Q10,JAML,FXYD5,H3F3B,CXCR4,CD300C2,YPEL3,CYTIP,PLA2G7,LSP1,CCPG1,ZFP36L2,CDC42EP3,CST3,JUND,TSPAN13,EMD,UCP2,LY6E,CD300LD,VPS37B,SSH2,CCR1,RPL37,RPL17,PTGS2OS2,SIRPB1B
2.48857e-103	0.673729	0.965	0.848	4.92861e-99	Dusp1	0		GO:BP	immune system process	GO:0002376	TRUE	0.0207367	1.68326	2819	47	16	26944	FOS,CSF3R,DUSP1,FGL2,LST1,EGR1,H2-Q10,JAML,CD300C2,PLA2G7,ZFP36L2,JUND,FAU,CD300LD,CCR1,SIRPB1B
1.89464e-68	0.667999	0.433	0.19	3.75233e-64	Gm2a	0		GO:BP	chemotaxis	GO:0006935	TRUE	0.0218712	1.66013	455	47	7	26944	CSF3R,DUSP1,JAML,CXCR4,PLA2G7,LSP1,CCR1
7.47553e-62	0.652929	0.485	0.235	1.48053e-57	Fgl2	0		GO:BP	taxis	GO:0042330	FALSE	0.0224989	1.64784	457	47	7	26944	CSF3R,DUSP1,JAML,CXCR4,PLA2G7,LSP1,CCR1
1.00585e-72	0.649219	0.737	0.51	1.99208e-68	Lst1	0		GO:BP	biological regulation	GO:0065007	FALSE	0.0230526	1.63728	13527	47	38	26944	FOS,BTG2,IL1R2,CDK2AP2,FOSB,MPP7,CSF3R,DUSP1,FGL2,EGR1,STK17B,H2-Q10,JAML,FXYD5,H3F3B,CXCR4,CD300C2,YPEL3,CYTIP,PLA2G7,LSP1,CCPG1,ZFP36L2,CDC42EP3,CST3,JUND,TSPAN13,EMD,UCP2,LY6E,CD300LD,VPS37B,SSH2,CCR1,RPL37,RPL17,PTGS2OS2,SIRPB1B
7.21406e-83	0.635335	0.708	0.464	1.42874e-78	Coq10b	0		GO:BP	positive regulation of cellular process	GO:0048522	FALSE	0.0300734	1.52182	6078	47	24	26944	FOS,BTG2,FOSB,MPP7,DUSP1,EGR1,STK17B,H2-Q10,JAML,CXCR4,CD300C2,YPEL3,PLA2G7,CCPG1,ZFP36L2,CDC42EP3,CST3,JUND,EMD,SSH2,CCR1,RPL37,RPL17,SIRPB1B
1.0995e-46	0.633907	0.519	0.3	2.17756e-42	Egr1	0		GO:BP	skeletal muscle cell differentiation	GO:0035914	TRUE	0.0383782	1.41592	95	47	4	26944	FOS,BTG2,EGR1,EMD
6.20871e-86	0.61732	0.818	0.56	1.22964e-81	Stk17b	0		GO:CC	transcription factor AP-1 complex	GO:0035976	TRUE	0.00596388	2.22447	5	44	2	26995	FOS,JUND
6.63915e-59	0.610826	0.639	0.41	1.31488e-54	H2-Q10	0		KEGG	Osteoclast differentiation	KEGG:04380	FALSE	0.0225839	1.6462	131	25	4	9330	FOS,FOSB,JUND,SIRPB1B
3.32766e-57	0.605643	0.348	0.128	6.59043e-53	Jaml	0
4.47941e-162	0.604978	0.995	0.937	8.87148e-158	Fxyd5	0
2.18713e-82	0.603119	0.997	0.982	4.33162e-78	H3f3b	0
4.36859e-45	0.596014	0.384	0.185	8.652e-41	Cxcr4	0
3.3746e-52	0.59259	0.375	0.177	6.6834e-48	Cd300c2	0
4.7545e-74	0.59081	0.692	0.436	9.41628e-70	Ypel3	0
7.17356e-61	0.588879	0.664	0.431	1.42072e-56	Cytip	0
1.50108e-39	0.583494	0.257	0.107	2.9729e-35	AW011738	0
1.57522e-61	0.582314	0.862	0.758	3.11973e-57	Tnfaip2	0
4.12379e-64	0.575647	0.715	0.474	8.16717e-60	Pla2g7	0
2.05046e-75	0.568891	0.836	0.648	4.06094e-71	Lsp1	0
2.75541e-56	0.56006	0.531	0.311	5.4571e-52	Ccpg1	0
1.9495e-46	0.558786	0.433	0.25	3.86099e-42	2410006H16Rik	0
1.97497e-33	0.551993	0.37	0.213	3.91142e-29	Zfp36l2	0
1.84285e-37	0.545369	0.224	0.087	3.64976e-33	Cdc42ep3	0
1.72494e-71	0.535114	0.842	0.657	3.41625e-67	Cst3	0
3.81157e-59	0.534573	0.834	0.724	7.54881e-55	Jund	0
8.15698e-48	0.532453	0.299	0.124	1.61549e-43	Tspan13	0
1.38922e-32	0.526824	0.535	0.411	2.75136e-28	Cwc25	0
4.85772e-40	0.523982	0.525	0.375	9.62071e-36	Emd	0
9.4098e-150	0.519204	0.999	0.977	1.86361e-145	Fau	0
4.11738e-53	0.514475	0.653	0.476	8.15447e-49	Ucp2	0
1.03332e-49	0.513959	0.603	0.412	2.0465e-45	Ankrd11	0
3.76006e-57	0.513443	0.755	0.52	7.44679e-53	Ly6e	0
1.29206e-55	0.511458	0.684	0.472	2.55892e-51	Cd300ld	0
2.19885e-41	0.511092	0.725	0.587	4.35482e-37	Vps37b	0
1.10398e-44	0.508196	0.364	0.185	2.18643e-40	Ssh2	0
9.65079e-45	0.506098	0.516	0.315	1.91134e-40	Fem1c	0
1.39592e-86	0.503665	0.955	0.859	2.76462e-82	Ccr1	0
1.55884e-68	0.501844	0.889	0.795	3.08727e-64	Rpl37	0
1.15869e-72	0.501509	0.871	0.743	2.29478e-68	Rpl17	0
3.60942e-36	0.49555	0.358	0.182	7.14846e-32	Ptgs2os2	0
4.66654e-45	0.495314	0.408	0.207	9.24208e-41	Sirpb1b	0
2.44289e-32	0.494635	0.595	0.455	4.83815e-28	Kctd12	0
2.32223e-45	0.493596	0.278	0.101	4.59917e-41	Pnpla2	0
1.26558e-30	0.484533	0.501	0.345	2.50649e-26	Igfbp6	0
1.25156e-45	0.47995	0.701	0.571	2.47871e-41	Neurl3	0
5.35896e-40	0.479653	0.489	0.311	1.06134e-35	Atg3	0
3.81359e-55	0.476502	0.741	0.558	7.55282e-51	Zyx	0
3.74329e-30	0.475874	0.725	0.64	7.41358e-26	Ifrd1	0
1.11117e-103	0.475231	0.986	0.935	2.20068e-99	Rps9	0
4.8806e-27	0.470027	0.37	0.242	9.66603e-23	H2-Q7	0
3.2427e-55	0.466415	0.781	0.583	6.42218e-51	Gda	0
2.64361e-56	0.465753	0.781	0.604	5.23566e-52	Laptm5	0
3.47386e-42	0.463962	0.839	0.766	6.87998e-38	Plin2	0
2.91208e-40	0.463682	0.704	0.529	5.76738e-36	D8Ertd738e	0
2.18393e-40	0.460486	0.618	0.424	4.32528e-36	Emb	0
7.78226e-56	0.459061	0.87	0.706	1.54128e-51	Hmgb2	0
1.88897e-38	0.457668	0.635	0.491	3.7411e-34	2024-03-07	0
2.5941e-44	0.454595	0.644	0.458	5.13762e-40	Csrnp1	0
6.30808e-40	0.452675	0.553	0.389	1.24932e-35	H2afj	0
9.53815e-36	0.449852	0.572	0.402	1.88903e-31	Gsn	0
1.01011e-36	0.449635	0.699	0.519	2.00052e-32	Ppp1r15a	0
3.69636e-44	0.448341	0.728	0.563	7.32064e-40	Fosl2	0
7.43754e-39	0.447586	0.465	0.278	1.473e-34	Grk2	0
1.81934e-43	0.446126	0.684	0.492	3.6032e-39	Sorl1	0
2.01876e-37	0.444513	0.468	0.278	3.99816e-33	Nfam1	0
1.46473e-120	0.441402	0.996	0.976	2.90091e-116	Tyrobp	0
7.83634e-38	0.438426	0.467	0.294	1.55199e-33	Per1	0
4.73195e-35	0.436199	0.472	0.298	9.37163e-31	Cd300a	0
2.47008e-38	0.435711	0.517	0.351	4.89199e-34	Rabac1	0
2.25838e-36	0.434193	0.676	0.541	4.47273e-32	Dennd4a	0
7.01545e-37	0.433404	0.484	0.304	1.38941e-32	Timm10b	0
1.56229e-39	0.433323	0.535	0.389	3.09411e-35	Supt4a	0
9.29641e-43	0.43229	0.634	0.467	1.84115e-38	Vamp8	0
1.9518e-45	0.425547	0.745	0.607	3.86554e-41	Adipor1	0
2.35652e-23	0.423538	0.526	0.382	4.66708e-19	Slc2a3	0
4.6824e-47	0.423165	0.728	0.587	9.27349e-43	Snap23	0
1.79786e-30	0.422294	0.356	0.206	3.56065e-26	Tbc1d15	0
3.77925e-35	0.420151	0.296	0.131	7.48481e-31	Gm5150	0
3.53996e-69	0.419441	0.96	0.868	7.01089e-65	Lmnb1	0
1.06633e-33	0.419228	0.313	0.154	2.11187e-29	Rassf3	0
2.72298e-32	0.417295	0.466	0.307	5.39286e-28	Dhrs7	0
1.13454e-12	0.414082	0.524	0.417	2.24696e-08	Asprv1	0
1.13921e-34	0.413303	0.596	0.428	2.25621e-30	Gpx4	0
1.31315e-50	0.41199	0.84	0.757	2.60069e-46	Ndel1	0
1.74431e-21	0.410822	0.28	0.156	3.45462e-17	Cebpd	0
1.76066e-33	0.408938	0.518	0.38	3.48698e-29	Fam32a	0
1.0487e-31	0.408679	0.602	0.483	2.07696e-27	Calm2	0
1.10623e-29	0.408621	0.545	0.398	2.19089e-25	Gcnt2	0
1.80404e-52	0.404872	0.838	0.756	3.5729e-48	Rpl18a	0
6.96962e-31	0.403399	0.517	0.356	1.38033e-26	2310001H17Rik	0
1.40824e-52	0.401672	0.999	0.987	2.78902e-48	Il1b	0
7.61224e-74	0.400462	0.99	0.977	1.5076e-69	Btg1	0
1.00444e-55	0.398022	0.993	0.965	1.98929e-51	Junb	0
1.16622e-42	0.397785	0.796	0.678	2.30971e-38	Selplg	0
9.99555e-38	0.396858	0.703	0.567	1.97962e-33	Sde2	0
1.90221e-35	0.395732	0.552	0.424	3.76732e-31	Tnfrsf1a	0
2.99932e-36	0.394788	0.729	0.55	5.94014e-32	Sell	0
6.58915e-57	0.394126	0.932	0.86	1.30498e-52	Rpl41	0
8.66075e-63	0.393128	0.956	0.891	1.71526e-58	Ets2	0
3.88267e-28	0.391262	0.623	0.469	7.68963e-24	Mirt1	0
2.66951e-55	0.391145	0.921	0.857	5.28697e-51	Ptprc	0
2.78751e-25	0.390391	0.618	0.52	5.52066e-21	Jdp2	0
1.67174e-30	0.390286	0.542	0.395	3.31088e-26	Selenon	0
2.89674e-27	0.389335	0.645	0.532	5.737e-23	Kpna4	0
1.9567e-34	0.389121	0.705	0.586	3.87524e-30	Efhd2	0
8.85198e-48	0.388673	0.848	0.735	1.75314e-43	Nfe2l2	0
4.13627e-33	0.388022	0.232	0.089	8.19188e-29	Sirpb1c	0
2.13543e-56	0.387573	0.929	0.876	4.22922e-52	Rps27	0
2.86771e-30	0.387175	0.516	0.382	5.67951e-26	Hcst	0
1.54898e-29	0.387097	0.641	0.511	3.06775e-25	Nudt4	0
1.59448e-55	0.384441	0.942	0.867	3.15788e-51	Map1lc3b	0
8.84956e-29	0.383853	0.514	0.369	1.75265e-24	Serp1	0
3.05939e-36	0.383579	0.742	0.601	6.05912e-32	Lyst	0
3.8573e-32	0.383079	0.704	0.538	7.63939e-28	Cxcr2	0
3.64256e-40	0.381066	0.8	0.716	7.21409e-36	Rpl27a	0
1.17786e-31	0.379292	0.159	0.046	2.33275e-27	Gm19696	0
1.47558e-33	0.379036	0.819	0.67	2.92238e-29	Ptgs2	0
4.64921e-22	0.378825	0.428	0.283	9.20776e-18	Ptma	0
4.37969e-19	0.377693	0.596	0.512	8.67397e-15	Apoe	0
3.55997e-20	0.377179	0.37	0.255	7.05051e-16	Ddit3	0
3.00122e-27	0.3768	0.505	0.364	5.94391e-23	Ncor1	0
7.02524e-25	0.376169	0.261	0.141	1.39135e-20	1600010M07Rik	0
3.53726e-37	0.375657	0.783	0.671	7.00555e-33	Srsf5	0
3.93933e-63	0.373369	0.975	0.946	7.80184e-59	Ddx5	0
9.7922e-20	0.372432	0.492	0.355	1.93935e-15	Mpeg1	0
1.78206e-21	0.371922	0.495	0.354	3.52936e-17	Txnip	0
2.00095e-46	0.371504	0.932	0.902	3.96289e-42	Nfkbiz	0
9.81687e-31	0.370385	0.546	0.411	1.94423e-26	AB124611	0
2.13696e-25	0.368711	0.271	0.146	4.23225e-21	Tctex1d2	0
2.18597e-24	0.367584	0.464	0.315	4.32931e-20	Ogfrl1	0
7.29912e-34	0.367066	0.752	0.659	1.44559e-29	Kdm6b	0
4.73293e-28	0.366743	0.64	0.521	9.37356e-24	Rpl27	0
5.87474e-48	0.3659	0.88	0.742	1.16349e-43	Gsr	0
9.59628e-26	0.363964	0.331	0.186	1.90054e-21	Washc2	0
1.19507e-24	0.362093	0.666	0.534	2.36685e-20	Gpx1	0
1.09676e-39	0.361112	0.812	0.713	2.17213e-35	Rps10	0
7.78842e-20	0.360578	0.327	0.219	1.5425e-15	Sh2d3c	0
1.53706e-25	0.360519	0.366	0.244	3.04415e-21	Tmem59	0
2.76456e-37	0.360008	0.8	0.725	5.47521e-33	Ankrd33b	0
4.43468e-26	0.359971	0.214	0.101	8.78287e-22	Tpst2	0
2.66092e-23	0.359013	0.32	0.197	5.26996e-19	Drap1	0
3.24973e-39	0.358639	0.876	0.816	6.43609e-35	Snx20	0
1.57982e-20	0.357981	0.368	0.241	3.12884e-16	Pbx1	0
6.36591e-21	0.35778	0.416	0.31	1.26077e-16	Jmjd1c	0
2.62664e-20	0.357164	0.517	0.395	5.20206e-16	Nfkbid	0
8.8007e-25	0.357032	0.206	0.107	1.74298e-20	Rab43	0
2.23493e-24	0.356792	0.405	0.277	4.42629e-20	Celf2	0
9.65945e-24	0.354705	0.568	0.456	1.91305e-19	Klf3	0
4.52023e-37	0.353594	0.734	0.622	8.95231e-33	Ube2b	0
2.27833e-25	0.353264	0.585	0.459	4.51223e-21	Ddx3x	0
4.99755e-32	0.352351	0.792	0.644	9.89765e-28	Picalm	0
1.41917e-22	0.348951	0.313	0.183	2.81066e-18	Arhgap45	0
1.06308e-15	0.348907	0.141	0.063	2.10543e-11	Acsl1	0
1.03634e-22	0.34643	0.365	0.227	2.05247e-18	Tnrc6b	0
3.90112e-20	0.34566	0.352	0.22	7.72618e-16	Braf	0
4.02703e-29	0.345646	0.721	0.6	7.97554e-25	Ncf2	0
2.82754e-20	0.345259	0.344	0.228	5.59994e-16	Ptpn18	0
2.68145e-17	0.343717	0.472	0.376	5.3106e-13	Zfand5	0
5.65797e-23	0.34369	0.375	0.244	1.12056e-18	Smap2	0
2.16326e-29	0.343357	0.645	0.553	4.28434e-25	Rpl18	0
1.06917e-21	0.342877	0.423	0.294	2.11749e-17	Ifngr1	0
8.93348e-24	0.342171	0.486	0.366	1.76928e-19	Syf2	0
1.66093e-27	0.341983	0.6	0.492	3.28947e-23	Themis2	0
1.19768e-19	0.341469	0.616	0.533	2.372e-15	Dnaja1	0
6.96665e-32	0.340842	0.891	0.826	1.37975e-27	Rps27a	0
9.68668e-32	0.339445	0.66	0.563	1.91845e-27	Pfdn5	0
5.70895e-23	0.33905	0.608	0.463	1.13066e-18	Tgfbi	0
2.95977e-20	0.337159	0.497	0.377	5.86182e-16	Hmgb1	0
1.18037e-57	0.33586	0.985	0.973	2.33773e-53	Pim1	0
3.25727e-22	0.334341	0.504	0.406	6.45103e-18	Stat3	0
1.21892e-36	0.33322	0.767	0.705	2.41406e-32	Sf3b1	0
6.57902e-22	0.332071	0.283	0.172	1.30298e-17	Glipr1	0
6.40588e-26	0.331057	0.643	0.525	1.26868e-21	Srrm2	0
8.50452e-63	0.329736	0.993	0.957	1.68432e-58	H2-D1	0
9.62211e-22	0.329305	0.425	0.326	1.90566e-17	Rbm3	0
1.45396e-31	0.328593	0.851	0.73	2.87957e-27	Taldo1	0
3.89133e-20	0.328319	0.465	0.358	7.70678e-16	Tmed10	0
2.50021e-31	0.327565	0.771	0.706	4.95166e-27	Rpl30	0
4.53063e-22	0.3274	0.332	0.203	8.97291e-18	Ppp3ca	0
2.03348e-15	0.327337	0.507	0.394	4.02731e-11	Tsc22d3	0
2.0794e-18	0.327105	0.439	0.322	4.11826e-14	Gpcpd1	0
1.26015e-15	0.326317	0.336	0.228	2.49572e-11	Plekho2	0
5.74796e-28	0.32599	0.651	0.511	1.13838e-23	Rpl13a	0
1.05915e-17	0.325745	0.412	0.296	2.09765e-13	Gm34084	0
1.40033e-20	0.325136	0.392	0.269	2.77335e-16	Zfp106	0
6.9086e-36	0.324888	0.128	0.024	1.36825e-31	Fbxo31	0
1.2287e-32	0.324161	0.819	0.725	2.43344e-28	Rpl37a	0
1.36568e-24	0.32404	0.711	0.615	2.70473e-20	Tgoln1	0
8.55499e-24	0.322723	0.204	0.091	1.69432e-19	Ctsa	0
2.05172e-25	0.322716	0.273	0.14	4.06343e-21	Preb	0
5.11379e-22	0.322427	0.691	0.611	1.01279e-17	Tpm4	0
4.72694e-19	0.322018	0.708	0.613	9.3617e-15	Rdh12	0
6.88559e-22	0.32065	0.479	0.367	1.36369e-17	Cmip	0
1.15615e-24	0.319252	0.662	0.562	2.28975e-20	Rpl10	0
2.73548e-18	0.317971	0.309	0.205	5.41762e-14	Med13l	0
1.10088e-42	0.315911	0.981	0.941	2.1803e-38	Msrb1	0
1.80332e-31	0.315285	0.811	0.748	3.57147e-27	Spi1	0
1.1677e-21	0.315065	0.149	0.067	2.31263e-17	Elmsan1	0
8.36572e-21	0.314869	0.7	0.661	1.65683e-16	Tgm2	0
5.60936e-24	0.313669	0.813	0.745	1.11093e-19	Nlrp3	0
2.70492e-19	0.313666	0.319	0.204	5.35709e-15	Gm26740	0
5.27191e-18	0.313512	0.327	0.204	1.0441e-13	Ankrd44	0
1.3654e-31	0.312937	0.798	0.723	2.70418e-27	Rpl34	0
1.37268e-24	0.31262	0.714	0.605	2.7186e-20	Cotl1	0
5.23864e-18	0.312568	0.261	0.163	1.03751e-13	Midn	0
2.13899e-33	0.31229	0.905	0.812	4.23628e-29	Slc16a3	0
1.25589e-19	0.311796	0.239	0.125	2.48729e-15	Ttc7	0
1.59517e-15	0.311369	0.282	0.179	3.15923e-11	Rin3	0
1.74278e-26	0.310091	0.718	0.616	3.45158e-22	Rplp2	0
2.79454e-19	0.309788	0.207	0.097	5.53458e-15	Gngt2	0
3.15874e-28	0.309616	0.96	0.922	6.25588e-24	G0s2	0
3.35928e-26	0.309298	0.709	0.594	6.65306e-22	Gpsm3	0
3.27497e-21	0.308755	0.671	0.565	6.48608e-17	Trib1	0
1.12006e-18	0.30724	0.286	0.182	2.21829e-14	Man2b1	0
5.09849e-22	0.307067	0.557	0.49	1.00976e-17	Slc25a3	0
3.08203e-28	0.306413	0.799	0.719	6.10397e-24	Rps14	0
8.32128e-18	0.305624	0.309	0.201	1.64803e-13	Unc119	0
2.38698e-27	0.304065	0.103	0.022	4.72742e-23	Acot1	0
5.04326e-18	0.303849	0.261	0.148	9.98817e-14	Grcc10	0
2.55511e-28	0.303681	0.795	0.728	5.0604e-24	Rpl9	0
4.83933e-18	0.302584	0.565	0.462	9.58428e-14	Rpl11	0
1.04763e-19	0.30232	0.561	0.434	2.07484e-15	Apbb1ip	0
1.09411e-17	0.301866	0.272	0.179	2.16689e-13	Sik1	0
3.21238e-27	0.300396	0.811	0.708	6.36211e-23	Mrpl33	0
2.32901e-21	0.300187	0.131	0.049	4.61261e-17	Retn	0
1.48108e-15	0.299171	0.275	0.177	2.93328e-11	Arid4a	0
1.21822e-37	0.298399	0.912	0.849	2.41268e-33	Rps16	0
3.4555e-35	0.298345	0.934	0.883	6.84361e-31	Arpc3	0
1.28339e-24	0.297221	0.7	0.593	2.54175e-20	Pirb	0
1.94836e-17	0.297111	0.323	0.196	3.85872e-13	4930581F22Rik	0
2.71294e-15	0.296902	0.289	0.185	5.37298e-11	Ltb	0
1.5447e-29	0.296689	0.816	0.771	3.05927e-25	Spag9	0
4.86305e-15	0.29576	0.296	0.196	9.63127e-11	Xylt1	0
6.88034e-33	0.295507	0.875	0.734	1.36265e-28	Ccl6	0
4.57079e-15	0.293944	0.262	0.179	9.05245e-11	Tm6sf1	0
7.39224e-13	0.293152	0.268	0.184	1.46403e-08	Smarca5	0
3.7904e-24	0.292599	0.83	0.745	7.50688e-20	Tiparp	0
2.50767e-15	0.292264	0.319	0.219	4.96644e-11	Btbd9	0
4.25783e-14	0.292077	0.228	0.13	8.43263e-10	Rgs2	0
1.78774e-12	0.291331	0.186	0.114	3.54063e-08	Hist1h4i	0
2.92598e-26	0.291305	0.796	0.639	5.7949e-22	Lrg1	0
4.56042e-23	0.291302	0.607	0.521	9.0319e-19	Dazap2	0
7.61428e-19	0.291246	0.625	0.54	1.50801e-14	Rps3a1	0
1.49505e-26	0.291232	0.64	0.593	2.96094e-22	Etf1	0
3.25516e-22	0.290666	0.665	0.557	6.44685e-18	Rpl39	0
1.07912e-16	0.290548	0.295	0.195	2.1372e-12	Unc93b1	0
1.41284e-18	0.290071	0.443	0.351	2.79813e-14	Atp6v0d1	0
6.05452e-16	0.289058	0.319	0.218	1.1991e-11	Il18rap	0
3.57335e-15	0.288023	0.382	0.275	7.07702e-11	Gpr132	0
9.4191e-10	0.287072	0.215	0.153	1.86545e-05	Sap18	0
4.47901e-18	0.286686	0.254	0.148	8.87068e-14	Erp29	0
6.62229e-14	0.286486	0.224	0.148	1.31154e-09	Sfpq	0
5.99302e-16	0.285677	0.23	0.126	1.18692e-11	Galnt11	0
8.75147e-38	0.285392	0.922	0.794	1.73323e-33	Coro1a	0
2.78203e-19	0.285332	0.602	0.486	5.5098e-15	Rpl38	0
9.57707e-22	0.284329	0.687	0.613	1.89674e-17	Rps21	0
3.82896e-36	0.284195	0.941	0.885	7.58326e-32	Neat1	0
7.43409e-20	0.28364	0.618	0.503	1.47232e-15	Syk	0
2.80832e-26	0.283587	0.894	0.824	5.56188e-22	H2-K1	0
2.27817e-17	0.283548	0.211	0.117	4.51191e-13	Tmem154	0
1.21217e-19	0.283328	0.678	0.584	2.4007e-15	Atox1	0
2.67084e-16	0.283286	0.3	0.193	5.28959e-12	Wipf1	0
2.04166e-12	0.28297	0.413	0.308	4.0435e-08	Gla	0
2.37074e-19	0.282814	0.865	0.802	4.69526e-15	Ctsd	0
1.17834e-14	0.281932	0.532	0.449	2.3337e-10	Tra2a	0
1.14632e-15	0.281585	0.819	0.753	2.27029e-11	Zfp36	0
3.70411e-19	0.281541	0.552	0.44	7.336e-15	Fam49b	0
1.43635e-17	0.281012	0.469	0.367	2.84469e-13	Anp32a	0
1.27606e-49	0.280243	0.987	0.912	2.52724e-45	Cd52	0
7.57083e-13	0.279858	0.352	0.281	1.4994e-08	Cdk11b	0
1.15419e-14	0.279154	0.456	0.338	2.28588e-10	Lbr	0
3.00103e-16	0.27864	0.391	0.294	5.94355e-12	Vps28	0
9.86938e-17	0.278073	0.252	0.144	1.95463e-12	Kmt2c	0
8.08881e-20	0.277892	0.606	0.541	1.60199e-15	Csf2rb	0
7.67469e-16	0.277674	0.598	0.536	1.51997e-11	Top1	0
5.04544e-29	0.27762	0.838	0.764	9.99249e-25	Cox8a	0
1.20407e-16	0.27737	0.433	0.354	2.38466e-12	Rab8a	0
7.15098e-16	0.275482	0.348	0.264	1.41625e-11	Max	0
2.63972e-18	0.274961	0.669	0.572	5.22797e-14	Rpl24	0
2.0907e-15	0.274764	0.22	0.134	4.14064e-11	Hdac4	0
5.39765e-26	0.274627	0.896	0.825	1.069e-21	Rpl23	0
3.95513e-29	0.274562	0.764	0.72	7.83313e-25	Rbm39	0
1.11771e-09	0.274546	0.193	0.125	2.21363e-05	H2-Q6	0
7.33598e-19	0.274375	0.52	0.445	1.45289e-14	Serinc3	0
3.69554e-18	0.273602	0.577	0.48	7.31902e-14	Atp5e	0
4.03093e-17	0.272811	0.582	0.499	7.98326e-13	Sbno1	0
7.12851e-48	0.27206	1	0.997	1.4118e-43	Malat1	0
8.40922e-13	0.271949	0.239	0.185	1.66545e-08	Arrdc3	0
8.94227e-36	0.271425	0.951	0.896	1.77102e-31	Tpd52	0
2.16859e-18	0.27108	0.162	0.071	4.29488e-14	Rasa3	0
1.66883e-14	0.270908	0.14	0.075	3.30512e-10	Gm16556	0
2.66039e-10	0.270843	0.194	0.128	5.26891e-06	Cir1	0
8.02761e-15	0.270611	0.461	0.357	1.58987e-10	Ppp2r5a	0
4.45372e-15	0.270514	0.301	0.189	8.8206e-11	Nisch	0
2.07633e-12	0.27024	0.275	0.179	4.11217e-08	Fam111a	0
1.81009e-14	0.269336	0.249	0.149	3.58488e-10	Pkn1	0
9.35433e-18	0.26872	0.508	0.43	1.85263e-13	Nsd3	0
5.15666e-18	0.268234	0.667	0.575	1.02128e-13	Fyb	0
4.35537e-21	0.267918	0.694	0.627	8.62581e-17	Rps23	0
1.03424e-14	0.26668	0.208	0.128	2.04831e-10	Rp9	0
1.20838e-55	0.266281	0.999	0.997	2.3932e-51	Tmsb4x	0
1.73243e-11	0.26596	0.467	0.399	3.43108e-07	Atp11b	0
1.89489e-18	0.265918	0.517	0.462	3.75283e-14	Uqcrh	0
1.71063e-13	0.265715	0.358	0.276	3.38791e-09	Itgal	0
2.27348e-14	0.265601	0.286	0.189	4.50264e-10	Ubn1	0
2.51931e-20	0.26543	0.71	0.637	4.98949e-16	Pde4b	0
4.12514e-18	0.26518	0.537	0.467	8.16984e-14	Ssu72	0
2.14863e-13	0.264956	0.205	0.119	4.25536e-09	Il6ra	0
6.59777e-17	0.26484	0.186	0.09	1.30669e-12	Pip4k2a	0
1.31376e-13	0.264621	0.397	0.313	2.6019e-09	Tomm7	0
6.53336e-50	0.264386	0.995	0.99	1.29393e-45	Cebpb	0
3.73095e-22	0.263465	0.683	0.61	7.38915e-18	Atp5l	0
1.91116e-12	0.263426	0.306	0.218	3.78505e-08	Fam129a	0
2.0432e-15	0.262312	0.393	0.319	4.04656e-11	Ube2s	0
5.14903e-17	0.261104	0.52	0.383	1.01977e-12	Akap13	0
1.56005e-23	0.260982	0.738	0.696	3.08969e-19	Rabgef1	0
4.26528e-13	0.260674	0.267	0.174	8.44739e-09	Mir142hg	0
4.32948e-13	0.259501	0.294	0.2	8.57454e-09	Pag1	0
2.25729e-14	0.258985	0.529	0.445	4.47057e-10	Ier2	0
9.22496e-14	0.258354	0.241	0.174	1.827e-09	Stk11	0
4.42406e-17	0.257395	0.519	0.434	8.76184e-13	Cox6b1	0
4.9262e-14	0.256465	0.33	0.222	9.75634e-10	Slc22a15	0
6.25047e-22	0.256236	0.839	0.734	1.23791e-17	Mcemp1	0
9.47437e-15	0.256033	0.261	0.176	1.8764e-10	Tmem14c	0
7.92882e-13	0.255863	0.294	0.218	1.5703e-08	Tprgl	0
1.61934e-12	0.255436	0.237	0.16	3.2071e-08	Cnbp	0
1.65169e-14	0.255234	0.341	0.231	3.27116e-10	Pstpip1	0
5.43268e-14	0.255039	0.125	0.055	1.07594e-09	Gm39321	0
1.9132e-22	0.25475	0.14	0.045	3.78909e-18	Elp1	0
1.19793e-12	0.254245	0.277	0.186	2.37251e-08	Bin2	0
3.97173e-18	0.254114	0.702	0.621	7.86601e-14	Emilin2	0
1.64899e-10	0.253703	0.352	0.255	3.26583e-06	Isy1	0
1.57755e-15	0.253285	0.182	0.097	3.12433e-11	Pfkfb4	0
1.43745e-13	0.253223	0.115	0.055	2.84688e-09	Impact	0
3.5794e-12	0.252918	0.29	0.199	7.089e-08	Ppt1	0
2.54892e-11	0.252556	0.341	0.262	5.04815e-07	Pbxip1	0
6.62492e-16	0.252551	0.147	0.078	1.31207e-11	N4bp2l1	0
4.69417e-12	0.252301	0.391	0.312	9.2968e-08	Cdc42se1	0
4.18142e-13	0.252143	0.347	0.281	8.28131e-09	Mpc1	0
2.43408e-10	0.251092	0.312	0.239	4.82069e-06	Wac	0
7.38044e-16	0.251042	0.581	0.525	1.4617e-11	Clk1	0

## Sheet: 1
p_val	avg_logFC	pct.1	pct.2	p_val_adj	gene	cluster		source	term_name	term_id	highlighted	adjusted_p_value	negative_log10_of_adjusted_p_value	term_size	query_size	intersection_size	effective_domain_size	intersections
0	1.84061	0.873	0.355	0	Hmox1	1		GO:MF	protein binding	GO:0005515	TRUE	6.32036e-06	5.19926	10460	46	38	25063	HMOX1,CSTB,SAA3,ESD,IL1RN,CCL4,PRDX1,LCN2,CCL3,SOD2,BATF,SQSTM1,BRI3,IL10,SLC31A2,HSP90AA1,GADD45B,GCLM,CHIL1,CTSB,ATP6V0C,CSF3,FTH1,EZR,DOCK10,SPP1,CD274,PLGRKT,RNH1,BCL2A1A,CD63,LAMP1,IL1A,FNIP2,SH3BP5,CD9,FURIN,TNIP1
0	1.84037	0.967	0.609	0	Cstb	1		GO:MF	molecular function regulator activity	GO:0098772	FALSE	2.70872e-05	4.56724	2074	46	17	25063	CSTB,SAA3,IL1RN,CCL4,CCL3,IL10,HSP90AA1,GCLM,CSF3,DOCK10,SPP1,RNH1,LAMP1,IL1A,FNIP2,SH3BP5,FURIN
1.77242e-32	1.73529	0.452	0.394	3.51028e-28	Saa3	1		GO:MF	binding	GO:0005488	FALSE	3.34123e-05	4.47609	16378	46	45	25063	HMOX1,CSTB,SAA3,ESD,IL1RN,CCL4,PRDX1,LCN2,CCL3,SOD2,BATF,SQSTM1,BRI3,F10,IL10,SLC31A2,HSP90AA1,GADD45B,GCLM,CHIL1,CTSB,ATP6V0C,PFKFB3,CSF3,FTH1,EZR,DOCK10,GDE1,CPEB4,SPP1,CD274,ORM1,PLGRKT,RNH1,BCL2A1A,CD63,LAMP1,IL1A,MT1,FNIP2,SH3BP5,CD9,FURIN,TNIP1,SGPL1
0	1.61273	0.909	0.549	0	Esd	1		GO:MF	cytokine activity	GO:0005125	FALSE	0.000114812	3.94001	241	46	7	25063	IL1RN,CCL4,CCL3,IL10,CSF3,SPP1,IL1A
0	1.4657	0.987	0.727	0	Il1rn	1		GO:MF	iron ion sequestering activity	GO:0140315	TRUE	0.0013964	2.85499	2	46	2	25063	LCN2,FTH1
0	1.4536	1	0.987	0	Ftl1	1		GO:MF	receptor ligand activity	GO:0048018	FALSE	0.00267696	2.57236	549	46	8	25063	SAA3,IL1RN,CCL4,CCL3,IL10,CSF3,SPP1,IL1A
1.65503e-272	1.4381	0.877	0.598	3.27779e-268	AA467197	1		GO:MF	signaling receptor activator activity	GO:0030546	FALSE	0.00293631	2.5322	556	46	8	25063	SAA3,IL1RN,CCL4,CCL3,IL10,CSF3,SPP1,IL1A
2.39558e-234	1.3239	0.964	0.682	4.74445e-230	Ccl4	1		GO:MF	signaling receptor regulator activity	GO:0030545	FALSE	0.00516678	2.28678	601	46	8	25063	SAA3,IL1RN,CCL4,CCL3,IL10,CSF3,SPP1,IL1A
1.26331e-61	1.31952	0.257	0.113	2.50199e-57	Prdx1	1		GO:MF	cytokine receptor binding	GO:0005126	FALSE	0.0101237	1.99466	317	46	6	25063	IL1RN,CCL4,CCL3,IL10,CSF3,IL1A
2.82564e-273	1.31904	0.968	0.927	5.59619e-269	Lcn2	1		GO:MF	molecular function inhibitor activity	GO:0140678	FALSE	0.0197008	1.70552	528	46	7	25063	CSTB,IL1RN,RNH1,LAMP1,FNIP2,SH3BP5,FURIN
4.39967e-222	1.23006	0.966	0.656	8.71356e-218	Ccl3	1		GO:MF	enzyme binding	GO:0019899	FALSE	0.0200808	1.69722	2330	46	14	25063	HMOX1,CSTB,LCN2,SOD2,SQSTM1,HSP90AA1,GCLM,ATP6V0C,CSF3,EZR,DOCK10,LAMP1,FURIN,TNIP1
2.20897e-282	1.2193	0.95	0.632	4.37486e-278	Sod2	1		GO:MF	CCR1 chemokine receptor binding	GO:0031726	TRUE	0.0208481	1.68093	6	46	2	25063	CCL4,CCL3
9.54519e-227	1.21085	0.678	0.162	1.89043e-222	Batf	1		GO:MF	metal ion sequestering activity	GO:0140487	FALSE	0.0208481	1.68093	6	46	2	25063	LCN2,FTH1
1.25544e-185	1.16329	0.811	0.455	2.48641e-181	Sqstm1	1		GO:MF	identical protein binding	GO:0042802	FALSE	0.024112	1.61777	2369	46	14	25063	HMOX1,ESD,CCL4,PRDX1,LCN2,CCL3,SOD2,SQSTM1,BRI3,HSP90AA1,FTH1,EZR,BCL2A1A,TNIP1
2.81951e-277	1.15972	0.888	0.452	5.58403e-273	Bri3	1		GO:MF	CCR5 chemokine receptor binding	GO:0031730	TRUE	0.0291532	1.53531	7	46	2	25063	CCL4,CCL3
9.51493e-140	1.15635	0.52	0.139	1.88443e-135	F10	1		GO:MF	signaling receptor binding	GO:0005102	FALSE	0.046651	1.33114	1591	46	11	25063	SAA3,IL1RN,CCL4,CCL3,SQSTM1,IL10,HSP90AA1,CSF3,SPP1,IL1A,CD9
4.67566e-66	1.14451	0.207	0.04	9.26014e-62	Il10	1		GO:BP	programmed cell death	GO:0012501	TRUE	1.03167e-09	8.98646	2125	46	22	26944	HMOX1,IL1RN,LCN2,CCL3,SOD2,SQSTM1,IL10,HSP90AA1,GADD45B,GCLM,CHIL1,CTSB,ATP6V0C,CPEB4,SPP1,CD274,BCL2A1A,LAMP1,IL1A,MT1,FNIP2,SGPL1
3.94984e-224	1.11301	0.694	0.194	7.82266e-220	Slc31a2	1		GO:BP	cell death	GO:0008219	FALSE	1.03167e-09	8.98646	2125	46	22	26944	HMOX1,IL1RN,LCN2,CCL3,SOD2,SQSTM1,IL10,HSP90AA1,GADD45B,GCLM,CHIL1,CTSB,ATP6V0C,CPEB4,SPP1,CD274,BCL2A1A,LAMP1,IL1A,MT1,FNIP2,SGPL1
2.11034e-35	1.0942	0.607	0.437	4.17952e-31	Hsp90aa1	1		GO:BP	response to stimulus	GO:0050896	FALSE	3.52019e-09	8.45343	10506	46	41	26944	HMOX1,SAA3,ESD,IL1RN,AA467197,CCL4,PRDX1,LCN2,CCL3,SOD2,BATF,SQSTM1,F10,IL10,HSP90AA1,GADD45B,GCLM,CHIL1,CTSB,ATP6V0C,CSF3,FTH1,EZR,DOCK10,GDE1,CPEB4,SPP1,CD274,ORM1,PLGRKT,BCL2A1A,CD63,LAMP1,IL1A,MT1,FNIP2,SH3BP5,CD9,FURIN,TNIP1,SGPL1
1.28978e-208	1.08705	0.982	0.76	2.55441e-204	Gadd45b	1		GO:BP	cellular response to stimulus	GO:0051716	FALSE	5.11012e-08	7.29157	8752	46	37	26944	HMOX1,SAA3,ESD,IL1RN,CCL4,PRDX1,LCN2,CCL3,SOD2,BATF,SQSTM1,F10,IL10,HSP90AA1,GADD45B,GCLM,CHIL1,CTSB,ATP6V0C,CSF3,EZR,DOCK10,GDE1,CPEB4,SPP1,CD274,BCL2A1A,CD63,LAMP1,IL1A,MT1,FNIP2,SH3BP5,CD9,FURIN,TNIP1,SGPL1
1.14372e-108	1.08527	0.417	0.206	2.26515e-104	Gclm	1		GO:BP	apoptotic process	GO:0006915	FALSE	5.42191e-08	7.26585	2050	46	20	26944	HMOX1,IL1RN,LCN2,CCL3,SOD2,SQSTM1,IL10,HSP90AA1,GADD45B,GCLM,CHIL1,CTSB,CPEB4,SPP1,CD274,BCL2A1A,IL1A,MT1,FNIP2,SGPL1
2.32972e-190	1.06027	0.788	0.519	4.61402e-186	Chil1	1		GO:BP	response to stress	GO:0006950	FALSE	8.4736e-08	7.07193	3936	46	26	26944	HMOX1,SAA3,IL1RN,CCL4,PRDX1,LCN2,CCL3,SOD2,BATF,SQSTM1,F10,IL10,HSP90AA1,GCLM,CHIL1,CPEB4,SPP1,ORM1,PLGRKT,BCL2A1A,LAMP1,IL1A,MT1,FNIP2,CD9,TNIP1
1.9014e-233	1.04782	0.905	0.486	3.76571e-229	Ctsz	1		GO:BP	immune system process	GO:0002376	TRUE	2.78721e-07	6.55483	2819	46	22	26944	HMOX1,IL1RN,CCL4,PRDX1,LCN2,CCL3,BATF,SQSTM1,IL10,HSP90AA1,CSF3,FTH1,EZR,DOCK10,SPP1,CD274,ORM1,BCL2A1A,LAMP1,IL1A,CD9,TNIP1
1.79799e-277	1.02245	0.956	0.736	3.56092e-273	Ctsb	1		GO:BP	cell migration	GO:0016477	FALSE	4.11703e-07	6.38542	1538	46	17	26944	HMOX1,SAA3,IL1RN,CCL4,LCN2,CCL3,SOD2,HSP90AA1,DOCK10,SPP1,CD274,RNH1,CD63,IL1A,CD9,FURIN,SGPL1
5.53777105612247e-309	1.01997	0.988	0.878	1.09676e-304	Atp6v0c	1		GO:BP	intracellular signal transduction	GO:0035556	FALSE	5.16839e-07	6.28664	2610	46	21	26944	HMOX1,CCL4,PRDX1,CCL3,SOD2,BATF,SQSTM1,F10,IL10,GADD45B,CHIL1,ATP6V0C,CSF3,EZR,DOCK10,BCL2A1A,IL1A,MT1,FNIP2,SH3BP5,TNIP1
1.63274e-155	1.01118	0.651	0.231	3.23365e-151	Pfkfb3	1		GO:BP	signal transduction	GO:0007165	FALSE	8.47505e-07	6.07186	6895	46	32	26944	HMOX1,IL1RN,CCL4,PRDX1,LCN2,CCL3,SOD2,BATF,SQSTM1,F10,IL10,GADD45B,GCLM,CHIL1,ATP6V0C,CSF3,EZR,DOCK10,GDE1,CPEB4,SPP1,CD274,BCL2A1A,CD63,LAMP1,IL1A,MT1,FNIP2,SH3BP5,FURIN,TNIP1,SGPL1
9.97324e-69	1.0108	0.332	0.096	1.9752e-64	Csf3	1		GO:BP	response to external stimulus	GO:0009605	FALSE	1.21236e-06	5.91637	3042	46	22	26944	SAA3,AA467197,CCL4,PRDX1,LCN2,CCL3,SOD2,BATF,IL10,HSP90AA1,GCLM,CHIL1,CSF3,CPEB4,SPP1,CD274,PLGRKT,CD63,LAMP1,IL1A,CD9,TNIP1
6.66885e-291	0.990046	1	0.999	1.32077e-286	Fth1	1		GO:BP	cellular homeostasis	GO:0019725	FALSE	2.44929e-06	5.61096	869	46	13	26944	HMOX1,PRDX1,LCN2,CCL3,SOD2,SLC31A2,GCLM,ATP6V0C,FTH1,SPP1,LAMP1,IL1A,MT1
2.8746e-181	0.979423	0.846	0.607	5.69314e-177	Ezr	1		GO:BP	cellular response to chemical stimulus	GO:0070887	FALSE	2.54073e-06	5.59504	3162	46	22	26944	HMOX1,SAA3,ESD,IL1RN,CCL4,PRDX1,LCN2,CCL3,SOD2,SQSTM1,IL10,GCLM,CHIL1,CTSB,CSF3,EZR,CPEB4,SPP1,CD274,IL1A,MT1,TNIP1
2.54255e-159	0.976986	0.675	0.294	5.03553e-155	Ftl1-ps1	1		GO:BP	locomotion	GO:0040011	FALSE	2.66282e-06	5.57466	1273	46	15	26944	HMOX1,SAA3,IL1RN,CCL4,LCN2,CCL3,SOD2,DOCK10,SPP1,CD274,PLGRKT,CD63,IL1A,CD9,FURIN
3.8925e-202	0.947746	0.583	0.109	7.70909e-198	Dock10	1		GO:BP	cell motility	GO:0048870	FALSE	3.24692e-06	5.48853	1760	46	17	26944	HMOX1,SAA3,IL1RN,CCL4,LCN2,CCL3,SOD2,HSP90AA1,DOCK10,SPP1,CD274,RNH1,CD63,IL1A,CD9,FURIN,SGPL1
2.37938e-148	0.945993	0.594	0.21	4.71236e-144	Gde1	1		GO:BP	biological regulation	GO:0065007	FALSE	5.00479e-06	5.30061	13527	46	42	26944	HMOX1,CSTB,IL1RN,CCL4,PRDX1,LCN2,CCL3,SOD2,BATF,SQSTM1,F10,IL10,SLC31A2,HSP90AA1,GADD45B,GCLM,CHIL1,CTSZ,CTSB,ATP6V0C,CSF3,FTH1,EZR,DOCK10,GDE1,CPEB4,SPP1,CD274,ORM1,PLGRKT,RNH1,BCL2A1A,CD63,LAMP1,IL1A,MT1,FNIP2,SH3BP5,CD9,FURIN,TNIP1,SGPL1
4.87069e-100	0.911564	0.497	0.178	9.6464e-96	Cpeb4	1		GO:BP	response to oxygen-containing compound	GO:1901700	FALSE	5.13595e-06	5.28938	2077	46	18	26944	HMOX1,ESD,PRDX1,LCN2,CCL3,SOD2,SQSTM1,IL10,HSP90AA1,GCLM,CSF3,EZR,CPEB4,SPP1,CD274,IL1A,MT1,TNIP1
9.41702e-28	0.911201	0.417	0.297	1.86504e-23	Spp1	1		GO:BP	regulation of response to stimulus	GO:0048583	FALSE	5.50535e-06	5.25922	3987	46	24	26944	HMOX1,IL1RN,CCL4,PRDX1,CCL3,SOD2,SQSTM1,F10,IL10,HSP90AA1,GADD45B,GCLM,CHIL1,ATP6V0C,CSF3,EZR,CD274,CD63,LAMP1,IL1A,FNIP2,CD9,FURIN,TNIP1
3.3763e-170	0.886305	0.837	0.431	6.68677e-166	Cd274	1		GO:BP	homeostatic process	GO:0042592	FALSE	6.10705e-06	5.21417	1835	46	17	26944	HMOX1,IL1RN,PRDX1,LCN2,CCL3,SOD2,SQSTM1,SLC31A2,GCLM,ATP6V0C,FTH1,DOCK10,SPP1,BCL2A1A,LAMP1,IL1A,MT1
9.82597e-51	0.882798	0.129	0.022	1.94603e-46	Orm1	1		GO:BP	intracellular chemical homeostasis	GO:0055082	FALSE	7.2807e-06	5.13783	768	46	12	26944	HMOX1,LCN2,CCL3,SOD2,SLC31A2,GCLM,ATP6V0C,FTH1,SPP1,LAMP1,IL1A,MT1
1.59273e-151	0.879136	0.647	0.229	3.1544e-147	Plgrkt	1		GO:BP	signaling	GO:0023052	FALSE	7.55376e-06	5.12184	7472	46	32	26944	HMOX1,IL1RN,CCL4,PRDX1,LCN2,CCL3,SOD2,BATF,SQSTM1,F10,IL10,GADD45B,GCLM,CHIL1,ATP6V0C,CSF3,EZR,DOCK10,GDE1,CPEB4,SPP1,CD274,BCL2A1A,CD63,LAMP1,IL1A,MT1,FNIP2,SH3BP5,FURIN,TNIP1,SGPL1
7.06509e-121	0.873695	0.609	0.279	1.39924e-116	Rnh1	1		GO:BP	monoatomic cation homeostasis	GO:0055080	FALSE	7.93535e-06	5.10043	608	46	11	26944	HMOX1,LCN2,CCL3,SOD2,SLC31A2,ATP6V0C,FTH1,SPP1,LAMP1,IL1A,MT1
1.31037e-131	0.873079	0.675	0.254	2.59519e-127	Bcl2a1a	1		GO:BP	monoatomic ion homeostasis	GO:0050801	FALSE	9.71396e-06	5.0126	620	46	11	26944	HMOX1,LCN2,CCL3,SOD2,SLC31A2,ATP6V0C,FTH1,SPP1,LAMP1,IL1A,MT1
1.22091e-95	0.842706	0.651	0.412	2.41802e-91	Cd63	1		GO:BP	cell communication	GO:0007154	FALSE	1.11914e-05	4.95111	7582	46	32	26944	HMOX1,IL1RN,CCL4,PRDX1,LCN2,CCL3,SOD2,BATF,SQSTM1,F10,IL10,GADD45B,GCLM,CHIL1,ATP6V0C,CSF3,EZR,DOCK10,GDE1,CPEB4,SPP1,CD274,BCL2A1A,CD63,LAMP1,IL1A,MT1,FNIP2,SH3BP5,FURIN,TNIP1,SGPL1
2.44475e-130	0.836984	0.64	0.302	4.84183e-126	Lamp1	1		GO:BP	neuron apoptotic process	GO:0051402	FALSE	1.30481e-05	4.88445	354	46	9	26944	HMOX1,LCN2,CCL3,SOD2,IL10,GCLM,CTSB,CPEB4,MT1
2.4145e-155	0.833843	0.865	0.428	4.78192e-151	Il1a	1		GO:BP	biological process involved in interspecies interaction between organisms	GO:0044419	FALSE	1.40958e-05	4.85091	1940	46	17	26944	SAA3,AA467197,CCL4,PRDX1,LCN2,CCL3,SOD2,BATF,IL10,HSP90AA1,CTSB,CSF3,CD274,LAMP1,IL1A,FURIN,TNIP1
1.70165e-12	0.828936	0.268	0.217	3.37012e-08	Mt1	1		GO:BP	immune response	GO:0006955	FALSE	1.46494e-05	4.83418	1945	46	17	26944	HMOX1,IL1RN,CCL4,PRDX1,LCN2,CCL3,BATF,IL10,HSP90AA1,CSF3,FTH1,EZR,DOCK10,CD274,LAMP1,IL1A,TNIP1
9.92344e-127	0.813978	0.414	0.078	1.96534e-122	Fnip2	1		GO:BP	regulation of biological process	GO:0050789	FALSE	1.51154e-05	4.82058	13144	46	41	26944	HMOX1,CSTB,IL1RN,CCL4,PRDX1,LCN2,CCL3,SOD2,BATF,SQSTM1,F10,IL10,SLC31A2,HSP90AA1,GADD45B,GCLM,CHIL1,CTSZ,ATP6V0C,CSF3,FTH1,EZR,DOCK10,GDE1,CPEB4,SPP1,CD274,ORM1,PLGRKT,RNH1,BCL2A1A,CD63,LAMP1,IL1A,MT1,FNIP2,SH3BP5,CD9,FURIN,TNIP1,SGPL1
3.63705e-91	0.806887	0.833	0.653	7.20318e-87	Il1f9	1		GO:BP	cellular response to oxygen-containing compound	GO:1901701	FALSE	2.38271e-05	4.62293	1497	46	15	26944	ESD,PRDX1,LCN2,SOD2,SQSTM1,IL10,GCLM,CSF3,EZR,CPEB4,SPP1,CD274,IL1A,MT1,TNIP1
4.76413e-130	0.800087	0.49	0.133	9.43536e-126	Sh3bp5	1		GO:BP	intracellular monoatomic cation homeostasis	GO:0030003	FALSE	3.24194e-05	4.48919	535	46	10	26944	HMOX1,LCN2,CCL3,SLC31A2,ATP6V0C,FTH1,SPP1,LAMP1,IL1A,MT1
2.66477e-227	0.796611	0.973	0.922	5.27758e-223	Cd9	1		GO:BP	intracellular monoatomic ion homeostasis	GO:0006873	FALSE	3.92697e-05	4.40594	546	46	10	26944	HMOX1,LCN2,CCL3,SLC31A2,ATP6V0C,FTH1,SPP1,LAMP1,IL1A,MT1
6.22169e-127	0.789768	0.707	0.357	1.23221e-122	Furin	1		GO:BP	defense response	GO:0006952	FALSE	4.04699e-05	4.39287	1812	46	16	26944	HMOX1,SAA3,IL1RN,CCL4,PRDX1,LCN2,CCL3,BATF,IL10,HSP90AA1,CHIL1,ORM1,PLGRKT,LAMP1,IL1A,TNIP1
5.80001e-136	0.779014	0.668	0.282	1.14869e-131	Tnip1	1		GO:BP	regulation of signal transduction	GO:0009966	FALSE	4.49604e-05	4.34717	3005	46	20	26944	HMOX1,IL1RN,CCL4,PRDX1,CCL3,SOD2,SQSTM1,F10,IL10,GADD45B,GCLM,CHIL1,ATP6V0C,CSF3,EZR,CD63,IL1A,FNIP2,FURIN,TNIP1
3.09686e-125	0.778775	0.586	0.209	6.13332e-121	Sgpl1	1		GO:BP	regulation of neuron apoptotic process	GO:0043523	FALSE	6.5348e-05	4.18477	299	46	8	26944	HMOX1,LCN2,CCL3,SOD2,IL10,GCLM,CPEB4,MT1
1.47147e-143	0.769505	0.535	0.135	2.91425e-139	Ikbke	1		GO:BP	negative regulation of neuron apoptotic process	GO:0043524	FALSE	8.641e-05	4.06344	202	46	7	26944	HMOX1,LCN2,SOD2,IL10,GCLM,CPEB4,MT1
5.6756e-97	0.763825	0.365	0.104	1.12405e-92	Adora2b	1		GO:BP	regulation of programmed cell death	GO:0043067	FALSE	0.000135709	3.86739	1707	46	15	26944	HMOX1,IL1RN,LCN2,CCL3,SOD2,IL10,HSP90AA1,GADD45B,GCLM,ATP6V0C,CPEB4,SPP1,CD274,BCL2A1A,MT1
8.20967e-124	0.762878	0.696	0.353	1.62593e-119	Irak3	1		GO:BP	inflammatory response	GO:0006954	FALSE	0.000150946	3.82118	811	46	11	26944	HMOX1,SAA3,IL1RN,CCL4,CCL3,IL10,CHIL1,ORM1,PLGRKT,IL1A,TNIP1
6.05787e-162	0.761822	0.901	0.645	1.19976e-157	Mapkapk2	1		GO:BP	regulation of intracellular signal transduction	GO:1902531	FALSE	0.000152203	3.81758	1722	46	15	26944	CCL4,PRDX1,CCL3,SOD2,SQSTM1,F10,IL10,GADD45B,CHIL1,ATP6V0C,CSF3,EZR,IL1A,FNIP2,TNIP1
7.85497e-154	0.759984	0.917	0.618	1.55568e-149	Ninj1	1		GO:BP	regulation of cellular process	GO:0050794	FALSE	0.000168885	3.77241	12593	46	39	26944	HMOX1,IL1RN,CCL4,PRDX1,LCN2,CCL3,SOD2,BATF,SQSTM1,F10,IL10,SLC31A2,HSP90AA1,GADD45B,GCLM,CHIL1,CTSZ,ATP6V0C,CSF3,FTH1,EZR,DOCK10,GDE1,CPEB4,SPP1,CD274,PLGRKT,RNH1,BCL2A1A,CD63,LAMP1,IL1A,MT1,FNIP2,SH3BP5,CD9,FURIN,TNIP1,SGPL1
2.96629e-100	0.751377	0.624	0.355	5.87475e-96	Plbd1	1		GO:BP	regulation of cytokine production	GO:0001817	FALSE	0.000177171	3.75161	824	46	11	26944	HMOX1,CCL4,CCL3,BATF,IL10,HSP90AA1,CHIL1,EZR,CD274,IL1A,FURIN
1.75968e-95	0.748636	0.563	0.27	3.48505e-91	Mafg	1		GO:BP	regulation of signaling	GO:0023051	FALSE	0.000183929	3.73535	3616	46	21	26944	HMOX1,IL1RN,CCL4,PRDX1,CCL3,SOD2,SQSTM1,F10,IL10,GADD45B,GCLM,CHIL1,ATP6V0C,CSF3,EZR,SPP1,CD63,IL1A,FNIP2,FURIN,TNIP1
3.18749e-85	0.746836	0.468	0.184	6.31282e-81	Mrpl52	1		GO:BP	regulation of cell communication	GO:0010646	FALSE	0.000183929	3.73535	3616	46	21	26944	HMOX1,IL1RN,CCL4,PRDX1,CCL3,SOD2,SQSTM1,F10,IL10,GADD45B,GCLM,CHIL1,ATP6V0C,CSF3,EZR,SPP1,CD63,IL1A,FNIP2,FURIN,TNIP1
7.0849e-106	0.744875	0.668	0.301	1.40316e-101	Arid5b	1		GO:BP	cytokine production	GO:0001816	FALSE	0.000190587	3.71991	830	46	11	26944	HMOX1,CCL4,CCL3,BATF,IL10,HSP90AA1,CHIL1,EZR,CD274,IL1A,FURIN
1.13219e-110	0.744598	0.445	0.125	2.2423e-106	Ube2f	1		GO:BP	response to other organism	GO:0051707	FALSE	0.000231228	3.63596	1778	46	15	26944	SAA3,AA467197,CCL4,PRDX1,LCN2,CCL3,SOD2,BATF,IL10,HSP90AA1,CSF3,CD274,LAMP1,IL1A,TNIP1
8.07725e-94	0.741861	0.575	0.335	1.5997e-89	Cd68	1		GO:BP	response to external biotic stimulus	GO:0043207	FALSE	0.000238099	3.62324	1782	46	15	26944	SAA3,AA467197,CCL4,PRDX1,LCN2,CCL3,SOD2,BATF,IL10,HSP90AA1,CSF3,CD274,LAMP1,IL1A,TNIP1
2.03991e-95	0.738031	0.538	0.258	4.04005e-91	Klhdc4	1		GO:BP	positive regulation of response to stimulus	GO:0048584	FALSE	0.000251071	3.6002	2359	46	17	26944	CCL4,CCL3,F10,IL10,HSP90AA1,GADD45B,CHIL1,ATP6V0C,CSF3,EZR,CD274,CD63,LAMP1,IL1A,FNIP2,FURIN,TNIP1
1.26007e-101	0.729168	0.884	0.697	2.49556e-97	Klf2	1		GO:BP	intracellular signaling cassette	GO:0141124	FALSE	0.000259841	3.58529	1794	46	15	26944	HMOX1,CCL4,PRDX1,CCL3,SQSTM1,F10,GADD45B,CHIL1,ATP6V0C,CSF3,EZR,DOCK10,IL1A,MT1,TNIP1
2.27317e-103	0.724836	0.7	0.441	4.50202e-99	Capg	1		GO:BP	response to biotic stimulus	GO:0009607	FALSE	0.000311046	3.50718	1819	46	15	26944	SAA3,AA467197,CCL4,PRDX1,LCN2,CCL3,SOD2,BATF,IL10,HSP90AA1,CSF3,CD274,LAMP1,IL1A,TNIP1
4.35286e-89	0.717961	0.492	0.219	8.62084e-85	Ebi3	1		GO:BP	chemical homeostasis	GO:0048878	FALSE	0.00034292	3.46481	1091	46	12	26944	HMOX1,LCN2,CCL3,SOD2,SLC31A2,GCLM,ATP6V0C,FTH1,SPP1,LAMP1,IL1A,MT1
9.58155e-91	0.716946	0.603	0.276	1.89763e-86	Map3k8	1		GO:BP	response to organic substance	GO:0010033	FALSE	0.000422634	3.37404	3435	46	20	26944	HMOX1,SAA3,ESD,IL1RN,CCL4,CCL3,SOD2,IL10,HSP90AA1,GCLM,CHIL1,CTSB,CSF3,EZR,CPEB4,SPP1,CD274,IL1A,CD9,TNIP1
7.02307e-135	0.712675	0.927	0.696	1.39092e-130	Marcks	1		GO:BP	inorganic ion homeostasis	GO:0098771	FALSE	0.000502149	3.29917	543	46	9	26944	HMOX1,LCN2,CCL3,SOD2,SLC31A2,FTH1,SPP1,IL1A,MT1
1.11701e-153	0.711622	0.919	0.534	2.21223e-149	Bcl2a1b	1		GO:BP	regulation of biological quality	GO:0065008	FALSE	0.000526824	3.27833	3134	46	19	26944	HMOX1,IL1RN,CCL4,CCL3,SOD2,SQSTM1,F10,IL10,HSP90AA1,GCLM,CTSB,ATP6V0C,CSF3,EZR,SPP1,LAMP1,CD9,FURIN,SGPL1
1.72023e-88	0.710769	0.846	0.747	3.40692e-84	Lgals3	1		GO:BP	cell activation	GO:0001775	FALSE	0.000661237	3.17964	1160	46	12	26944	HMOX1,PRDX1,CCL3,BATF,IL10,HSP90AA1,GCLM,DOCK10,CD274,LAMP1,IL1A,CD9
1.60742e-83	0.708015	0.348	0.087	3.1835e-79	Pwp1	1		GO:BP	regulation of apoptotic process	GO:0042981	FALSE	0.000675867	3.17014	1658	46	14	26944	HMOX1,IL1RN,LCN2,CCL3,SOD2,IL10,HSP90AA1,GADD45B,GCLM,CPEB4,SPP1,CD274,BCL2A1A,MT1
8.58286e-100	0.704456	0.498	0.178	1.69984e-95	Fndc3a	1		GO:BP	response to chemical	GO:0042221	FALSE	0.000842859	3.07425	5561	46	25	26944	HMOX1,SAA3,ESD,IL1RN,CCL4,PRDX1,LCN2,CCL3,SOD2,SQSTM1,IL10,HSP90AA1,GCLM,CHIL1,CTSB,CSF3,EZR,CPEB4,SPP1,CD274,PLGRKT,IL1A,MT1,CD9,TNIP1
1.21364e-99	0.702188	0.742	0.504	2.40361e-95	Tpi1	1		GO:BP	regulation of cell migration	GO:0030334	FALSE	0.00103794	2.98383	984	46	11	26944	HMOX1,IL1RN,LCN2,CCL3,SOD2,DOCK10,CD274,CD63,IL1A,CD9,FURIN
3.70416e-140	0.695721	0.956	0.831	7.33609e-136	Basp1	1		GO:BP	apoptotic signaling pathway	GO:0097190	FALSE	0.00180084	2.74452	633	46	9	26944	HMOX1,LCN2,SOD2,IL10,GCLM,BCL2A1A,IL1A,FNIP2,SGPL1
1.80796e-36	0.695606	0.959	0.927	3.58066e-32	Slpi	1		GO:BP	regulation of cell motility	GO:2000145	FALSE	0.00187304	2.72745	1045	46	11	26944	HMOX1,IL1RN,LCN2,CCL3,SOD2,DOCK10,CD274,CD63,IL1A,CD9,FURIN
8.71068e-84	0.677273	0.474	0.172	1.72515e-79	Rhob	1		GO:BP	cellular response to organic substance	GO:0071310	FALSE	0.00213218	2.67118	2420	46	16	26944	SAA3,IL1RN,CCL4,CCL3,SOD2,IL10,GCLM,CHIL1,CTSB,CSF3,EZR,CPEB4,SPP1,CD274,IL1A,TNIP1
3.08864e-56	0.675482	0.617	0.48	6.11705e-52	Txnrd1	1		GO:BP	regulation of ERK1 and ERK2 cascade	GO:0070372	FALSE	0.00228186	2.64171	328	46	7	26944	CCL4,CCL3,CHIL1,ATP6V0C,EZR,IL1A,TNIP1
4.06245e-139	0.674212	0.975	0.877	8.04569e-135	Ubb	1		GO:BP	negative regulation of programmed cell death	GO:0043069	FALSE	0.00233768	2.63122	1069	46	11	26944	HMOX1,IL1RN,LCN2,SOD2,IL10,GCLM,ATP6V0C,CPEB4,SPP1,BCL2A1A,MT1
9.78725e-122	0.672624	0.876	0.694	1.93837e-117	Atp6v1e1	1		GO:BP	cell surface receptor signaling pathway	GO:0007166	FALSE	0.00241649	2.61682	2766	46	17	26944	HMOX1,IL1RN,CCL4,LCN2,CCL3,IL10,GCLM,ATP6V0C,CSF3,EZR,CPEB4,CD274,BCL2A1A,CD63,IL1A,FURIN,SGPL1
1.62243e-76	0.671544	0.828	0.626	3.21322e-72	Hilpda	1		GO:BP	acute-phase response	GO:0006953	TRUE	0.00256694	2.59058	49	46	4	26944	SAA3,IL1RN,ORM1,IL1A
1.6534e-119	0.670346	0.367	0.062	3.27455e-115	Fmnl2	1		GO:BP	regulation of locomotion	GO:0040012	FALSE	0.00279972	2.55289	1089	46	11	26944	HMOX1,IL1RN,LCN2,CCL3,SOD2,DOCK10,CD274,CD63,IL1A,CD9,FURIN
5.32688e-78	0.666351	0.604	0.281	1.05499e-73	Bcl2a1d	1		GO:BP	regulation of MAPK cascade	GO:0043408	FALSE	0.00287576	2.54125	670	46	9	26944	CCL4,PRDX1,CCL3,GADD45B,CHIL1,ATP6V0C,EZR,IL1A,TNIP1
1.29536e-119	0.66529	0.903	0.705	2.56546e-115	Cd24a	1		GO:BP	regulation of multicellular organismal process	GO:0051239	FALSE	0.00321095	2.49337	3165	46	18	26944	HMOX1,CCL4,LCN2,CCL3,BATF,IL10,HSP90AA1,CHIL1,CSF3,EZR,SPP1,CD274,RNH1,CD63,IL1A,CD9,FURIN,SGPL1
2.36893e-91	0.65938	0.816	0.624	4.69167e-87	Ldha	1		GO:BP	response to reactive oxygen species	GO:0000302	FALSE	0.00331453	2.47958	219	46	6	26944	HMOX1,PRDX1,LCN2,SOD2,SQSTM1,IL1A
2.41673e-84	0.659273	0.644	0.351	4.78634e-80	C3	1		GO:BP	negative regulation of biological process	GO:0048519	FALSE	0.00336109	2.47352	5966	46	25	26944	HMOX1,CSTB,IL1RN,LCN2,CCL3,SOD2,SQSTM1,IL10,GCLM,CTSZ,ATP6V0C,FTH1,EZR,CPEB4,SPP1,CD274,BCL2A1A,CD63,IL1A,MT1,FNIP2,SH3BP5,CD9,FURIN,TNIP1
4.89318e-102	0.651065	0.957	0.92	9.69094e-98	Txn1	1		GO:BP	regulation of protein metabolic process	GO:0051246	TRUE	0.00347607	2.45891	1901	46	14	26944	CSTB,SQSTM1,IL10,HSP90AA1,CHIL1,CTSZ,CSF3,EZR,CPEB4,PLGRKT,FNIP2,SH3BP5,FURIN,TNIP1
1.29777e-44	0.650886	0.535	0.348	2.57024e-40	Rgcc	1		GO:BP	ERK1 and ERK2 cascade	GO:0070371	FALSE	0.0036444	2.43837	352	46	7	26944	CCL4,CCL3,CHIL1,ATP6V0C,EZR,IL1A,TNIP1
1.19895e-88	0.650035	0.676	0.43	2.37453e-84	Bsg	1		GO:BP	negative regulation of cellular process	GO:0048523	FALSE	0.00429271	2.36727	5599	46	24	26944	HMOX1,IL1RN,LCN2,CCL3,SOD2,SQSTM1,IL10,GCLM,CTSZ,ATP6V0C,FTH1,EZR,CPEB4,SPP1,CD274,BCL2A1A,CD63,IL1A,MT1,FNIP2,SH3BP5,CD9,FURIN,TNIP1
6.9486e-50	0.646761	0.357	0.286	1.37617e-45	Creg1	1		GO:BP	multicellular organismal-level homeostasis	GO:0048871	FALSE	0.00436597	2.35992	912	46	10	26944	HMOX1,IL1RN,PRDX1,LCN2,SOD2,SQSTM1,DOCK10,SPP1,BCL2A1A,IL1A
1.5902e-41	0.646227	0.67	0.47	3.14939e-37	Jun	1		GO:BP	positive regulation of cytokine production	GO:0001819	FALSE	0.00449396	2.34737	523	46	8	26944	CCL4,CCL3,BATF,IL10,HSP90AA1,CHIL1,CD274,IL1A
3.1244e-98	0.642477	0.8	0.605	6.18788e-94	Pgam1	1		GO:BP	positive regulation of cellular process	GO:0048522	FALSE	0.00481883	2.31706	6078	46	25	26944	HMOX1,CCL4,LCN2,CCL3,SOD2,BATF,SQSTM1,F10,IL10,HSP90AA1,GADD45B,CHIL1,ATP6V0C,CSF3,EZR,SPP1,CD274,PLGRKT,BCL2A1A,CD63,LAMP1,IL1A,FNIP2,FURIN,TNIP1
6.54882e-92	0.63026	0.781	0.506	1.29699e-87	Mif	1		GO:BP	response to interleukin-1	GO:0070555	FALSE	0.00506729	2.29522	131	46	5	26944	SAA3,IL1RN,CCL4,CCL3,CHIL1
9.01157e-71	0.62919	0.572	0.312	1.78474e-66	Rilpl2	1		GO:BP	positive regulation of cell communication	GO:0010647	FALSE	0.00595387	2.2252	1990	46	14	26944	CCL4,CCL3,SQSTM1,F10,IL10,GADD45B,CHIL1,ATP6V0C,CSF3,SPP1,CD63,IL1A,FNIP2,FURIN
2.33296e-81	0.625604	0.358	0.106	4.62043e-77	Abcc1	1		GO:BP	positive regulation of signaling	GO:0023056	FALSE	0.00595387	2.2252	1990	46	14	26944	CCL4,CCL3,SQSTM1,F10,IL10,GADD45B,CHIL1,ATP6V0C,CSF3,SPP1,CD63,IL1A,FNIP2,FURIN
7.31041e-87	0.622832	0.942	0.804	1.44783e-82	Ubc	1		GO:BP	response to toxic substance	GO:0009636	FALSE	0.00761579	2.11829	253	46	6	26944	ESD,PRDX1,LCN2,CCL3,SOD2,MT1
2.11135e-30	0.620531	0.285	0.151	4.18153e-26	Id2	1		GO:BP	MAPK cascade	GO:0000165	FALSE	0.00786824	2.10412	758	46	9	26944	CCL4,PRDX1,CCL3,GADD45B,CHIL1,ATP6V0C,EZR,IL1A,TNIP1
1.18267e-96	0.619781	0.883	0.71	2.34228e-92	Card19	1		GO:BP	positive regulation of cellular metabolic process	GO:0031325	FALSE	0.0104105	1.98253	3434	46	18	26944	HMOX1,CCL4,LCN2,CCL3,SOD2,BATF,SQSTM1,IL10,HSP90AA1,CHIL1,CSF3,EZR,SPP1,CD274,PLGRKT,IL1A,FNIP2,TNIP1
1.12299e-86	0.61977	0.408	0.117	2.22408e-82	Gns	1		GO:BP	response to oxidative stress	GO:0006979	FALSE	0.0110898	1.95508	417	46	7	26944	HMOX1,PRDX1,LCN2,SOD2,SQSTM1,GCLM,IL1A
4.54315e-166	0.617101	0.991	0.977	8.9977e-162	Fcer1g	1		GO:BP	leukocyte activation	GO:0045321	FALSE	0.0129116	1.88902	1031	46	10	26944	HMOX1,PRDX1,CCL3,BATF,IL10,HSP90AA1,DOCK10,CD274,LAMP1,IL1A
7.12642e-95	0.615259	0.77	0.59	1.41139e-90	Cd47	1		GO:BP	positive regulation of gene expression	GO:0010628	FALSE	0.0136966	1.86339	1285	46	11	26944	CCL4,LCN2,CCL3,BATF,IL10,HSP90AA1,CHIL1,EZR,CD274,PLGRKT,IL1A
5.34791e-66	0.603642	0.736	0.488	1.05915e-61	Cks2	1		GO:BP	negative regulation of apoptotic process	GO:0043066	FALSE	0.0138156	1.85963	1039	46	10	26944	HMOX1,IL1RN,LCN2,SOD2,IL10,GCLM,CPEB4,SPP1,BCL2A1A,MT1
6.71063e-148	0.603575	0.948	0.851	1.32904e-143	Cd53	1		GO:BP	regulation of immune system process	GO:0002682	FALSE	0.0159524	1.79717	1575	46	12	26944	HMOX1,CCL3,IL10,HSP90AA1,CSF3,EZR,CD274,ORM1,LAMP1,IL1A,CD9,TNIP1
1.20011e-79	0.603468	0.487	0.191	2.37681e-75	Znrf1	1		GO:BP	positive regulation of apoptotic process	GO:0043065	FALSE	0.0160036	1.79578	622	46	8	26944	HMOX1,LCN2,CCL3,SOD2,IL10,GADD45B,CD274,BCL2A1A
7.09519e-67	0.600225	0.466	0.202	1.4052e-62	Tgfb1	1		GO:BP	positive regulation of programmed cell death	GO:0043068	FALSE	0.020127	1.69622	642	46	8	26944	HMOX1,LCN2,CCL3,SOD2,IL10,GADD45B,CD274,BCL2A1A
5.67987e-10	0.593903	0.406	0.351	1.1249e-05	Chil3	1		GO:BP	positive regulation of signal transduction	GO:0009967	FALSE	0.0202969	1.69257	1613	46	12	26944	CCL4,CCL3,F10,IL10,GADD45B,CHIL1,ATP6V0C,CSF3,CD63,IL1A,FNIP2,FURIN
2.15575e-81	0.593023	0.511	0.197	4.26946e-77	Klhl24	1		GO:BP	positive regulation of biological process	GO:0048518	FALSE	0.0223358	1.651	6589	46	25	26944	HMOX1,CCL4,LCN2,CCL3,SOD2,BATF,SQSTM1,F10,IL10,HSP90AA1,GADD45B,CHIL1,ATP6V0C,CSF3,EZR,SPP1,CD274,PLGRKT,BCL2A1A,CD63,LAMP1,IL1A,FNIP2,FURIN,TNIP1
1.1889e-45	0.592796	0.341	0.145	2.35462e-41	Sephs2	1		GO:BP	multicellular organismal process	GO:0032501	FALSE	0.0240716	1.61849	9132	46	30	26944	HMOX1,CSTB,IL1RN,CCL4,PRDX1,LCN2,CCL3,SOD2,BATF,SQSTM1,F10,IL10,HSP90AA1,GCLM,CHIL1,CTSZ,CTSB,CSF3,EZR,DOCK10,SPP1,CD274,RNH1,BCL2A1A,CD63,LAMP1,IL1A,CD9,FURIN,SGPL1
4.57095e-64	0.590383	0.552	0.29	9.05277e-60	Morrbid	1		GO:BP	organonitrogen compound metabolic process	GO:1901564	TRUE	0.0273572	1.56293	5744	46	23	26944	HMOX1,CSTB,CCL3,SOD2,SQSTM1,F10,IL10,HSP90AA1,GCLM,CHIL1,CTSZ,CTSB,CSF3,EZR,GDE1,CPEB4,SPP1,PLGRKT,FNIP2,SH3BP5,FURIN,TNIP1,SGPL1
9.63776e-56	0.59025	0.247	0.079	1.90876e-51	Sh3bgrl	1		GO:BP	response to organic cyclic compound	GO:0014070	FALSE	0.0302289	1.51958	1137	46	10	26944	SAA3,IL1RN,CCL3,SOD2,IL10,HSP90AA1,GCLM,EZR,SPP1,IL1A
1.55782e-84	0.587791	0.801	0.538	3.08527e-80	Tnfrsf1b	1		GO:BP	leukocyte activation involved in immune response	GO:0002366	FALSE	0.0305557	1.51491	323	46	6	26944	HMOX1,CCL3,BATF,IL10,DOCK10,LAMP1
7.71474e-61	0.587409	0.381	0.139	1.5279e-56	Arf2	1		GO:BP	cell activation involved in immune response	GO:0002263	FALSE	0.0321891	1.49229	326	46	6	26944	HMOX1,CCL3,BATF,IL10,DOCK10,LAMP1
5.65907e-62	0.582859	0.612	0.355	1.12078e-57	Gna13	1		GO:BP	positive regulation of metabolic process	GO:0009893	FALSE	0.0352194	1.45322	3745	46	18	26944	HMOX1,CCL4,LCN2,CCL3,SOD2,BATF,SQSTM1,IL10,HSP90AA1,CHIL1,CSF3,EZR,SPP1,CD274,PLGRKT,IL1A,FNIP2,TNIP1
2.21292e-81	0.581249	0.241	0.036	4.38269e-77	Fam20c	1		GO:BP	response to xenobiotic stimulus	GO:0009410	FALSE	0.0372503	1.42887	503	46	7	26944	CCL4,LCN2,CCL3,SOD2,IL10,HSP90AA1,GCLM
1.4107e-85	0.58074	0.721	0.513	2.7939e-81	Slc9a3r1	1		GO:BP	negative regulation of cell population proliferation	GO:0008285	FALSE	0.0378747	1.42165	701	46	8	26944	HMOX1,SOD2,IL10,FTH1,CD274,IL1A,FNIP2,CD9
6.3281e-64	0.579781	0.502	0.277	1.25328e-59	Rybp	1		GO:BP	negative regulation of vascular associated smooth muscle cell proliferation	GO:1904706	TRUE	0.0384649	1.41494	32	46	3	26944	HMOX1,SOD2,IL10
2.36478e-75	0.578246	0.319	0.086	4.68345e-71	Fcgr2b	1		GO:BP	response to cytokine	GO:0034097	FALSE	0.044064	1.35592	1188	46	10	26944	SAA3,IL1RN,CCL4,CCL3,GCLM,CHIL1,CSF3,SPP1,CD274,IL1A
4.60099e-69	0.576028	0.357	0.114	9.11225e-65	Slco3a1	1		GO:BP	regulation of transport	GO:0051049	TRUE	0.0455699	1.34132	1749	46	12	26944	HMOX1,IL1RN,LCN2,CCL3,SLC31A2,HSP90AA1,EZR,SPP1,CD63,LAMP1,IL1A,FURIN
1.28194e-73	0.575034	0.663	0.377	2.53888e-69	Irak2	1		GO:BP	developmental process	GO:0032502	TRUE	0.0463534	1.33392	6854	46	25	26944	HMOX1,IL1RN,LCN2,CCL3,SOD2,BATF,SQSTM1,IL10,HSP90AA1,GADD45B,CHIL1,CTSZ,CTSB,CSF3,EZR,DOCK10,SPP1,CD274,RNH1,CD63,LAMP1,IL1A,CD9,FURIN,SGPL1
8.35212e-70	0.573912	0.905	0.702	1.65414e-65	Hcar2	1		GO:CC	vesicle	GO:0031982	TRUE	4.86752e-08	7.31269	2228	47	20	26995	ESD,IL1RN,LCN2,SQSTM1,SLC31A2,HSP90AA1,CTSZ,CTSB,ATP6V0C,CSF3,FTH1,EZR,GDE1,SPP1,CD274,CD63,LAMP1,SH3BP5,CD9,FURIN
1.29384e-61	0.567554	0.513	0.291	2.56244e-57	Atp6v1a	1		GO:CC	extracellular region	GO:0005576	TRUE	7.10896e-08	7.14819	2554	47	21	26995	CSTB,SAA3,IL1RN,CCL4,LCN2,CCL3,F10,IL10,CHIL1,CTSZ,CTSB,CSF3,FTH1,SPP1,CD274,ORM1,RNH1,CD63,IL1A,CD9,FURIN
1.21256e-87	0.566397	0.802	0.633	2.40148e-83	Atp6v0e	1		GO:CC	cytoplasm	GO:0005737	FALSE	7.19489e-08	7.14298	11561	47	41	26995	HMOX1,CSTB,ESD,IL1RN,AA467197,PRDX1,LCN2,CCL3,SOD2,BATF,SQSTM1,BRI3,SLC31A2,HSP90AA1,GADD45B,GCLM,CHIL1,CTSZ,CTSB,ATP6V0C,PFKFB3,CSF3,FTH1,EZR,DOCK10,GDE1,CPEB4,SPP1,CD274,PLGRKT,RNH1,BCL2A1A,CD63,LAMP1,IL1A,MT1,FNIP2,SH3BP5,FURIN,TNIP1,SGPL1
3.22291e-55	0.56603	0.506	0.258	6.38297e-51	Rhov	1		GO:CC	extracellular space	GO:0005615	FALSE	1.35633e-07	6.86763	1836	47	18	26995	CSTB,SAA3,IL1RN,CCL4,LCN2,CCL3,F10,IL10,CHIL1,CTSZ,CTSB,CSF3,SPP1,CD274,ORM1,CD63,IL1A,CD9
1.11237e-38	0.56377	0.207	0.097	2.20304e-34	Blvrb	1		GO:CC	vacuole	GO:0005773	FALSE	2.18758e-06	5.66004	640	47	11	26995	SQSTM1,BRI3,SLC31A2,CTSZ,CTSB,ATP6V0C,FTH1,CD63,LAMP1,MT1,FNIP2
2.63729e-103	0.562828	0.278	0.035	5.22315e-99	Mreg	1		GO:CC	lysosome	GO:0005764	FALSE	5.1458e-06	5.28855	535	47	10	26995	SQSTM1,BRI3,SLC31A2,CTSZ,CTSB,FTH1,CD63,LAMP1,MT1,FNIP2
6.16588e-45	0.557957	0.618	0.38	1.22115e-40	Atf3	1		GO:CC	lytic vacuole	GO:0000323	FALSE	5.1458e-06	5.28855	535	47	10	26995	SQSTM1,BRI3,SLC31A2,CTSZ,CTSB,FTH1,CD63,LAMP1,MT1,FNIP2
5.04447e-62	0.557908	0.775	0.544	9.99058e-58	Traf1	1		GO:CC	cytoplasmic vesicle	GO:0031410	FALSE	7.129e-06	5.14697	2077	47	17	26995	ESD,LCN2,SQSTM1,SLC31A2,HSP90AA1,CTSZ,CTSB,ATP6V0C,CSF3,FTH1,EZR,GDE1,CD274,CD63,LAMP1,SH3BP5,FURIN
1.0514e-43	0.551181	0.411	0.199	2.08231e-39	Ankrd12	1		GO:CC	intracellular vesicle	GO:0097708	FALSE	7.33394e-06	5.13466	2081	47	17	26995	ESD,LCN2,SQSTM1,SLC31A2,HSP90AA1,CTSZ,CTSB,ATP6V0C,CSF3,FTH1,EZR,GDE1,CD274,CD63,LAMP1,SH3BP5,FURIN
1.22228e-60	0.550148	0.37	0.133	2.42073e-56	Schip1	1		GO:CC	autolysosome	GO:0044754	FALSE	0.00031192	3.50596	13	47	3	26995	SQSTM1,FTH1,LAMP1
2.28646e-54	0.546125	0.36	0.139	4.52834e-50	Denr	1		GO:CC	secondary lysosome	GO:0005767	FALSE	0.000495024	3.30537	15	47	3	26995	SQSTM1,FTH1,LAMP1
1.29518e-63	0.544861	0.564	0.291	2.56511e-59	Atp6ap2	1		GO:CC	endocytic vesicle lumen	GO:0071682	TRUE	0.000662258	3.17897	2	47	2	26995	CSF3,FTH1
5.06518e-64	0.541003	0.306	0.086	1.00316e-59	Bax	1		GO:CC	membrane-bounded organelle	GO:0043227	FALSE	0.00320643	2.49398	14934	47	40	26995	HMOX1,CSTB,ESD,IL1RN,AA467197,PRDX1,LCN2,SOD2,BATF,SQSTM1,BRI3,SLC31A2,HSP90AA1,GADD45B,CHIL1,CTSZ,CTSB,ATP6V0C,PFKFB3,CSF3,FTH1,EZR,DOCK10,GDE1,CPEB4,SPP1,CD274,PLGRKT,RNH1,BCL2A1A,CD63,LAMP1,IL1A,MT1,FNIP2,SH3BP5,CD9,FURIN,TNIP1,SGPL1
1.29633e-69	0.537538	0.731	0.443	2.56739e-65	Rbpj	1		GO:CC	intracellular membrane-bounded organelle	GO:0043231	FALSE	0.00486841	2.31261	14435	47	39	26995	HMOX1,CSTB,ESD,IL1RN,AA467197,PRDX1,LCN2,SOD2,BATF,SQSTM1,BRI3,SLC31A2,HSP90AA1,GADD45B,CHIL1,CTSZ,CTSB,ATP6V0C,PFKFB3,CSF3,FTH1,EZR,DOCK10,GDE1,CPEB4,SPP1,CD274,PLGRKT,RNH1,BCL2A1A,CD63,LAMP1,IL1A,MT1,FNIP2,SH3BP5,FURIN,TNIP1,SGPL1
5.16881e-54	0.53581	0.45	0.237	1.02368e-49	Kmt5a	1		GO:CC	pigment granule	GO:0048770	FALSE	0.00701428	2.15402	103	47	4	26995	HSP90AA1,CTSB,CD63,LAMP1
3.27491e-55	0.530298	0.482	0.235	6.48596e-51	Il4ra	1		GO:CC	melanosome	GO:0042470	FALSE	0.00701428	2.15402	103	47	4	26995	HSP90AA1,CTSB,CD63,LAMP1
2.60606e-82	0.528153	0.818	0.534	5.16131e-78	Cflar	1		GO:CC	vacuolar membrane	GO:0005774	FALSE	0.00790397	2.10215	358	47	6	26995	BRI3,SLC31A2,ATP6V0C,CD63,LAMP1,FNIP2
1.48128e-65	0.524297	0.85	0.629	2.93368e-61	Upp1	1		GO:CC	cell surface	GO:0009986	TRUE	0.0143577	1.84291	1037	47	9	26995	HSP90AA1,CTSZ,CTSB,CD274,CD63,LAMP1,IL1A,CD9,FURIN
1.80196e-58	0.524123	0.625	0.37	3.56878e-54	Nfkbib	1		GO:CC	perinuclear region of cytoplasm	GO:0048471	FALSE	0.0170673	1.76784	819	47	8	26995	HMOX1,BRI3,HSP90AA1,CTSB,EZR,CPEB4,SPP1,LAMP1
1.85051e-63	0.522967	0.267	0.069	3.66494e-59	Gas7	1		GO:CC	cytoplasmic vesicle membrane	GO:0030659	FALSE	0.0364155	1.43871	914	47	8	26995	SLC31A2,ATP6V0C,GDE1,CD274,CD63,LAMP1,SH3BP5,FURIN
1.07484e-39	0.522723	0.421	0.255	2.12873e-35	Pts	1		GO:CC	lytic vacuole membrane	GO:0098852	FALSE	0.0371322	1.43025	298	47	5	26995	BRI3,SLC31A2,CD63,LAMP1,FNIP2
3.81563e-57	0.522466	0.392	0.175	7.55685e-53	Ubap1	1		GO:CC	lysosomal membrane	GO:0005765	FALSE	0.0371322	1.43025	298	47	5	26995	BRI3,SLC31A2,CD63,LAMP1,FNIP2
9.9422e-40	0.522183	0.264	0.113	1.96905e-35	Gm31814	1		GO:CC	organelle	GO:0043226	FALSE	0.038159	1.4184	16169	47	40	26995	HMOX1,CSTB,ESD,IL1RN,AA467197,PRDX1,LCN2,SOD2,BATF,SQSTM1,BRI3,SLC31A2,HSP90AA1,GADD45B,CHIL1,CTSZ,CTSB,ATP6V0C,PFKFB3,CSF3,FTH1,EZR,DOCK10,GDE1,CPEB4,SPP1,CD274,PLGRKT,RNH1,BCL2A1A,CD63,LAMP1,IL1A,MT1,FNIP2,SH3BP5,CD9,FURIN,TNIP1,SGPL1
2.13473e-58	0.522156	0.574	0.337	4.22784e-54	Lrrfip2	1		GO:CC	vesicle membrane	GO:0012506	FALSE	0.0403998	1.39362	928	47	8	26995	SLC31A2,ATP6V0C,GDE1,CD274,CD63,LAMP1,SH3BP5,FURIN
3.07241e-75	0.521858	0.901	0.807	6.08491e-71	Rab7	1		KEGG	Lysosome	KEGG:04142	FALSE	0.00838927	2.07628	135	34	5	9330	CTSZ,CTSB,ATP6V0C,CD63,LAMP1
1.40684e-68	0.51968	0.31	0.09	2.78624e-64	B4galt5	1		KEGG	Ferroptosis	KEGG:04216	FALSE	0.0285815	1.54391	40	34	3	9330	HMOX1,GCLM,FTH1
3.27569e-70	0.519637	0.41	0.141	6.4875e-66	Ralgds	1		KEGG	Cytokine-cytokine receptor interaction	KEGG:04060	FALSE	0.0396359	1.40191	290	34	6	9330	IL1RN,CCL4,CCL3,IL10,CSF3,IL1A
5.85797e-39	0.518959	0.491	0.503	1.16017e-34	Psap	1
6.18253e-73	0.507573	0.292	0.069	1.22445e-68	Plagl2	1
1.80243e-49	0.503162	0.185	0.043	3.56972e-45	St6galnac4	1
2.70964e-59	0.501564	0.475	0.231	5.36644e-55	Sirt2	1
1.08867e-39	0.500877	0.573	0.438	2.15611e-35	Eif4ebp1	1
4.5877e-71	0.499156	0.279	0.061	9.08593e-67	Atp6v1c1	1
3.87283e-69	0.497461	0.962	0.953	7.67014e-65	Prdx5	1
4.28852e-55	0.496939	0.334	0.114	8.4934e-51	1700017B05Rik	1
2.83541e-74	0.494427	0.921	0.877	5.61553e-70	Cyba	1
1.2597e-33	0.494134	0.26	0.113	2.49484e-29	Nos2	1
1.47037e-39	0.493625	0.443	0.237	2.91207e-35	Bnip3	1
4.23027e-78	0.493326	0.825	0.656	8.37806e-74	Atp6v0b	1
7.54916e-53	0.492011	0.619	0.428	1.49511e-48	Lrrc25	1
1.64159e-51	0.491526	0.554	0.405	3.25116e-47	Bnip3l	1
4.41019e-55	0.488793	0.654	0.497	8.73437e-51	Ubald2	1
4.40229e-44	0.486138	0.428	0.207	8.71873e-40	Hk2	1
1.18575e-60	0.485566	0.253	0.061	2.34839e-56	Pdcd1lg2	1
1.64462e-46	0.48233	0.369	0.158	3.25718e-42	Itgb1	1
4.35205e-54	0.481924	0.424	0.192	8.61923e-50	Slc25a37	1
1.24364e-53	0.478703	0.433	0.213	2.46302e-49	Tmem38b	1
1.05205e-67	0.47617	0.913	0.792	2.08358e-63	Ctsd	1
1.36472e-39	0.474851	0.408	0.222	2.70283e-35	Cdk5r1	1
4.02501e-44	0.473833	0.712	0.572	7.97153e-40	Ptpn1	1
2.57109e-53	0.473305	0.612	0.489	5.09204e-49	Gng12	1
1.51395e-42	0.472556	0.417	0.219	2.99839e-38	P4hb	1
4.73706e-23	0.468854	0.174	0.122	9.38175e-19	Itpr2	1
3.52027e-48	0.465362	0.507	0.269	6.97189e-44	Mapk6	1
9.97551e-26	0.462278	0.405	0.235	1.97565e-21	Gm12840	1
6.76765e-52	0.46178	0.327	0.132	1.34033e-47	Ubtd1	1
1.22541e-40	0.460848	0.314	0.136	2.42692e-36	Milr1	1
2.32419e-52	0.460318	0.398	0.164	4.60306e-48	M6pr	1
2.01804e-33	0.460133	0.354	0.186	3.99673e-29	Eif2s2	1
9.24111e-32	0.459961	0.328	0.161	1.8302e-27	Dedd2	1
3.74266e-41	0.458364	0.634	0.453	7.41233e-37	Casp4	1
6.17979e-33	0.455186	0.558	0.355	1.22391e-28	Tnf	1
3.38774e-47	0.45391	0.315	0.124	6.70941e-43	Ptges3	1
1.208e-42	0.453878	0.536	0.359	2.39245e-38	Sin3b	1
1.44812e-23	0.451299	0.314	0.241	2.86801e-19	Plk2	1
1.16966e-71	0.449541	0.933	0.835	2.31652e-67	Ehd1	1
8.05838e-43	0.446797	0.943	0.899	1.59596e-38	Pnrc1	1
2.66217e-34	0.443941	0.569	0.382	5.27243e-30	Ero1l	1
9.97359e-28	0.443771	0.49	0.307	1.97527e-23	Icam1	1
2.56397e-27	0.443586	0.225	0.118	5.07795e-23	Srxn1	1
2.20201e-27	0.442641	0.454	0.308	4.36108e-23	Metrnl	1
6.95796e-45	0.437073	0.332	0.136	1.37802e-40	Rab9	1
7.44857e-38	0.436753	0.731	0.606	1.47519e-33	Riok3	1
1.60988e-36	0.436354	0.375	0.199	3.18837e-32	Rest	1
4.48579e-34	0.435857	0.214	0.072	8.8841e-30	Cldn1	1
2.2724e-41	0.433148	0.284	0.104	4.50048e-37	St13	1
8.7717e-45	0.431134	0.552	0.327	1.73724e-40	Iqsec1	1
1.82002e-44	0.42836	0.54	0.33	3.60455e-40	Lasp1	1
2.15889e-49	0.424512	0.245	0.072	4.27568e-45	Npc1	1
5.6033e-52	0.422562	0.223	0.053	1.10973e-47	Mllt6	1
7.1801e-70	0.421125	0.897	0.843	1.42202e-65	Rhoa	1
8.748e-42	0.418589	0.377	0.173	1.73254e-37	Aff1	1
6.12713e-38	0.418175	0.294	0.119	1.21348e-33	Zbtb7a	1
1.58773e-33	0.417724	0.443	0.283	3.14449e-29	Anxa3	1
9.4732e-40	0.415557	0.24	0.089	1.87617e-35	Acsl5	1
4.49844e-21	0.415175	0.279	0.153	8.90915e-17	Osgin1	1
4.41449e-46	0.414101	0.7	0.459	8.74289e-42	Bhlhe40	1
8.52017e-100	0.412449	0.995	0.982	1.68742e-95	Eif1	1
9.11306e-50	0.408894	0.287	0.093	1.80484e-45	C9orf72	1
5.91245e-50	0.408657	0.196	0.042	1.17096e-45	Mfsd7a	1
4.78905e-53	0.408265	0.269	0.08	9.48471e-49	Rps6ka2	1
3.44834e-34	0.406615	0.559	0.383	6.82944e-30	Il10rb	1
1.32956e-41	0.406401	0.473	0.24	2.63319e-37	Csf1	1
6.04742e-38	0.406359	0.516	0.292	1.19769e-33	Tnfrsf23	1
9.18187e-44	0.405441	0.663	0.42	1.81847e-39	Tgif1	1
1.99804e-07	0.40233	0.439	0.389	0.00395711	Cstdc4	1
5.21563e-24	0.399309	0.617	0.481	1.03296e-19	Socs3	1
4.31241e-34	0.399252	0.681	0.509	8.54073e-30	Eif5	1
5.04117e-37	0.398636	0.637	0.451	9.98404e-33	Fas	1
1.08148e-31	0.397176	0.567	0.422	2.14188e-27	Eif4a1	1
6.71347e-28	0.395758	0.552	0.396	1.3296e-23	Zc3h12a	1
4.46855e-58	0.395742	0.896	0.798	8.84997e-54	Sdcbp	1
4.59293e-34	0.391135	0.286	0.137	9.0963e-30	Psmb5	1
4.01001e-83	0.390597	0.98	0.938	7.94182e-79	Gabarap	1
4.09902e-28	0.387971	0.807	0.676	8.11811e-24	Klf6	1
6.35326e-28	0.386182	0.382	0.23	1.25826e-23	Mpp1	1
9.20914e-45	0.385637	0.857	0.681	1.82387e-40	Zeb2	1
7.7805e-41	0.380768	0.998	0.974	1.54093e-36	Nfkbia	1
7.90495e-38	0.379711	0.635	0.419	1.56558e-33	Cpne2	1
2.48925e-38	0.379288	0.273	0.104	4.92996e-34	Arl8a	1
2.03845e-20	0.377631	0.292	0.156	4.03715e-16	E230032D23Rik	1
1.6998e-26	0.377362	0.446	0.289	3.36646e-22	Alas1	1
6.13216e-08	0.376588	0.174	0.117	0.00121447	Inhba	1
1.76607e-36	0.376346	0.438	0.242	3.49771e-32	Relb	1
1.98521e-40	0.375262	0.278	0.102	3.93171e-36	Rragc	1
6.58388e-32	0.37472	0.339	0.163	1.30394e-27	Fuca2	1
1.82403e-33	0.374604	0.346	0.165	3.61249e-29	Vav1	1
7.82912e-35	0.373954	0.281	0.112	1.55056e-30	Sla	1
2.45019e-18	0.372548	0.836	0.727	4.8526e-14	Cxcl3	1
8.17598e-34	0.371834	0.173	0.051	1.61925e-29	Tecpr1	1
4.19107e-43	0.371731	0.841	0.747	8.30042e-39	Eef1a1	1
1.75984e-22	0.371571	0.396	0.268	3.48536e-18	4833407H14Rik	1
4.8062e-30	0.371019	0.259	0.12	9.51867e-26	Osbpl8	1
5.32061e-38	0.370514	0.927	0.78	1.05375e-33	Ccrl2	1
1.03818e-54	0.370339	0.889	0.84	2.05611e-50	Vasp	1
4.29544e-27	0.368668	0.76	0.64	8.50712e-23	Hspa5	1
1.97113e-31	0.367674	0.494	0.292	3.90381e-27	Gla	1
3.07834e-36	0.364959	0.266	0.105	6.09665e-32	Slc31a1	1
9.06721e-35	0.364428	0.769	0.611	1.79576e-30	Rab11fip1	1
1.57545e-34	0.36375	0.333	0.159	3.12018e-30	Map2k1	1
2.50576e-39	0.363248	0.197	0.053	4.96265e-35	Zfp703	1
4.65876e-28	0.363191	0.31	0.169	9.22668e-24	Hmox2	1
1.45467e-37	0.362822	0.195	0.055	2.88097e-33	Tm9sf4	1
3.84871e-33	0.362695	0.797	0.694	7.62237e-29	Fcgr3	1
2.87116e-29	0.36257	0.281	0.137	5.68633e-25	Agpat4	1
5.70885e-57	0.361766	0.171	0.025	1.13064e-52	Stom	1
6.18271e-41	0.360887	0.18	0.041	1.22449e-36	Frrs1	1
3.01221e-30	0.359273	0.588	0.434	5.96569e-26	Hck	1
3.96114e-27	0.35911	0.327	0.166	7.84505e-23	Runx1	1
5.47675e-43	0.358568	0.832	0.636	1.08467e-38	Pik3ap1	1
1.14997e-29	0.357559	0.326	0.156	2.27751e-25	Zmiz1	1
1.0541e-34	0.353097	0.259	0.105	2.08764e-30	Sh3gl1	1
6.71106e-27	0.352813	0.231	0.106	1.32913e-22	B3gnt2	1
5.68031e-25	0.351664	0.525	0.502	1.12499e-20	Cyp4f18	1
5.92901e-30	0.350878	0.441	0.274	1.17424e-25	Atp6v1d	1
1.07206e-34	0.350807	0.892	0.818	2.12322e-30	Aldoa	1
7.53707e-31	0.35048	0.367	0.202	1.49272e-26	Pfkl	1
1.19787e-19	0.349441	0.293	0.194	2.37239e-15	Lipg	1
1.10518e-27	0.349325	0.329	0.188	2.18881e-23	Rab10	1
3.45162e-22	0.347221	0.298	0.172	6.83593e-18	Egln3	1
5.80479e-34	0.347066	0.249	0.103	1.14964e-29	Psmd11	1
2.82891e-30	0.346249	0.36	0.181	5.60266e-26	Atf7ip	1
4.84798e-42	0.345973	0.861	0.787	9.60142e-38	Msn	1
5.93514e-41	0.345821	0.118	0.015	1.17546e-36	Gm36913	1
1.48316e-23	0.342548	0.455	0.299	2.93739e-19	Eea1	1
2.36153e-19	0.342113	0.383	0.271	4.67701e-15	Zfp292	1
1.29137e-29	0.338968	0.885	0.782	2.55755e-25	Ier5	1
9.8647e-26	0.334218	0.374	0.223	1.9537e-21	Sntb2	1
1.7021e-25	0.334015	0.264	0.12	3.37101e-21	Fam162a	1
2.11227e-30	0.333948	0.28	0.127	4.18336e-26	Ndfip2	1
6.2874e-19	0.331783	0.315	0.207	1.24522e-14	Cycs	1
4.46523e-22	0.331158	0.395	0.255	8.84339e-18	Optn	1
2.59218e-27	0.329685	0.453	0.277	5.1338e-23	Neu1	1
2.36151e-28	0.328098	0.531	0.406	4.67698e-24	Ube2l3	1
5.61358e-28	0.327856	0.266	0.124	1.11177e-23	Wsb2	1
2.49352e-32	0.327839	0.242	0.09	4.93842e-28	Slc44a1	1
2.52475e-28	0.327292	0.536	0.384	5.00027e-24	Gnb1	1
3.10062e-30	0.326901	0.595	0.436	6.14077e-26	Clta	1
3.76355e-24	0.326836	0.286	0.151	7.4537e-20	Ppp4r2	1
5.40555e-36	0.325924	0.617	0.388	1.07057e-31	Gm20186	1
5.69281e-42	0.325866	0.957	0.912	1.12746e-37	Slfn2	1
1.31147e-23	0.324997	0.31	0.169	2.59737e-19	Wwp2	1
2.27281e-31	0.324556	0.178	0.072	4.50131e-27	Msmo1	1
3.47218e-28	0.324138	0.673	0.542	6.87666e-24	Capza2	1
1.13279e-32	0.322967	0.765	0.588	2.2435e-28	N4bp1	1
2.68425e-31	0.322635	0.241	0.097	5.31615e-27	Rbpms	1
8.37132e-27	0.322215	0.709	0.615	1.65794e-22	Kras	1
7.78783e-21	0.32211	0.32	0.206	1.54238e-16	Mdm2	1
6.19295e-22	0.321333	0.501	0.375	1.22651e-17	Pfkp	1
7.53239e-27	0.32066	0.666	0.572	1.49179e-22	Ncf4	1
4.05525e-35	0.320659	0.11	0.017	8.03142e-31	Serf1	1
4.50633e-29	0.320626	0.185	0.063	8.92478e-25	Sowahc	1
5.5965e-27	0.32049	0.276	0.132	1.10839e-22	6530402F18Rik	1
6.53053e-26	0.320048	0.696	0.549	1.29337e-21	Adgre5	1
2.60082e-22	0.319671	0.329	0.181	5.15092e-18	Gm20406	1
3.19261e-24	0.319197	0.932	0.892	6.32296e-20	Slc7a11	1
5.17134e-33	0.318874	0.206	0.068	1.02418e-28	Tpp1	1
6.5352e-24	0.318784	0.465	0.303	1.2943e-19	Rab32	1
1.82821e-26	0.318075	0.609	0.44	3.62077e-22	Slc11a1	1
1.85481e-35	0.317918	0.913	0.859	3.67344e-31	Sat1	1
2.67132e-29	0.317428	0.762	0.643	5.29055e-25	Pgk1	1
1.05892e-20	0.316994	0.405	0.263	2.0972e-16	Sema4d	1
1.31314e-21	0.31659	0.439	0.303	2.60067e-17	Sf3b6	1
1.11006e-25	0.315454	0.278	0.139	2.19847e-21	St3gal1	1
6.42945e-22	0.314738	0.417	0.259	1.27335e-17	Dleu2	1
1.0606e-20	0.314578	0.247	0.124	2.10051e-16	Apoc2	1
2.78438e-11	0.313288	0.932	0.882	5.51445e-07	Ier3	1
7.75565e-32	0.312453	0.217	0.077	1.53601e-27	P2rx4	1
2.52349e-29	0.308842	0.737	0.633	4.99777e-25	Chmp4b	1
2.40302e-23	0.307885	0.269	0.151	4.75918e-19	Ywhag	1
1.05081e-05	0.307801	0.217	0.158	0.208113	Clec4n	1
9.36878e-25	0.307727	0.219	0.104	1.85549e-20	Nfyb	1
1.17013e-21	0.307157	0.338	0.221	2.31745e-17	Gramd1a	1
2.4495e-22	0.307009	0.491	0.338	4.85123e-18	Hnrnpf	1
2.66644e-21	0.306439	0.379	0.272	5.28088e-17	Zdhhc18	1
2.53467e-27	0.30523	0.239	0.1	5.01991e-23	Tnfrsf26	1
1.26526e-43	0.304933	0.957	0.947	2.50585e-39	Msrb1	1
5.12608e-23	0.303471	0.157	0.096	1.01522e-18	Mfsd14a	1
1.20037e-22	0.302586	0.448	0.308	2.37734e-18	Npepps	1
8.81111e-23	0.301846	0.337	0.194	1.74504e-18	Napa	1
3.52532e-23	0.301824	0.607	0.48	6.9819e-19	Tuba1c	1
2.90882e-28	0.300729	0.206	0.08	5.76092e-24	Gba	1
1.51247e-21	0.300361	0.431	0.294	2.99545e-17	Cyfip1	1
1.90898e-38	0.300346	0.144	0.027	3.78073e-34	Ggta1	1
9.46901e-22	0.299835	0.441	0.313	1.87534e-17	Ifngr2	1
4.53554e-18	0.297871	0.423	0.289	8.98264e-14	Trim25	1
5.44874e-19	0.297448	0.478	0.356	1.07912e-14	Ubxn4	1
2.39783e-22	0.297195	0.197	0.085	4.7489e-18	Canx	1
4.78429e-26	0.297135	0.229	0.095	9.4753e-22	Ncoa3	1
4.82355e-17	0.296721	0.482	0.395	9.55303e-13	1810058I24Rik	1
4.45625e-18	0.296463	0.507	0.353	8.82561e-14	Mpeg1	1
8.77749e-15	0.29516	0.262	0.161	1.73838e-10	Tceal9	1
4.11561e-15	0.294766	0.193	0.103	8.15096e-11	Eif3a	1
3.19135e-24	0.294513	0.14	0.042	6.32047e-20	Gm31718	1
4.11773e-19	0.293611	0.52	0.406	8.15517e-15	Arl6ip1	1
2.47272e-21	0.293367	0.366	0.222	4.89721e-17	Surf4	1
4.77737e-19	0.292154	0.425	0.319	9.46157e-15	Ap3s1	1
5.71574e-16	0.290892	0.433	0.348	1.132e-11	Mbnl2	1
5.4259e-22	0.290817	0.181	0.069	1.0746e-17	Trpm7	1
1.78733e-19	0.290643	0.428	0.285	3.5398e-15	Map4k4	1
2.42903e-28	0.289065	0.778	0.712	4.81069e-24	Rac1	1
2.09455e-20	0.288689	0.158	0.062	4.14826e-16	Amdhd2	1
2.57615e-22	0.288544	0.264	0.128	5.10206e-18	Fam50a	1
5.75042e-48	0.288199	0.981	0.94	1.13887e-43	Lilrb4a	1
1.01403e-31	0.286807	0.191	0.06	2.00829e-27	Slc9a8	1
1.84372e-21	0.285489	0.405	0.265	3.65149e-17	Ubxn1	1
4.68155e-34	0.285467	0.163	0.042	9.27182e-30	Rhoq	1
1.37429e-32	0.285397	0.182	0.058	2.72178e-28	Fam214b	1
3.74005e-19	0.285393	0.53	0.397	7.40716e-15	Bcl2l1	1
1.92755e-18	0.285312	0.344	0.23	3.81751e-14	Rab31	1
2.16911e-21	0.285039	0.395	0.239	4.29592e-17	Sh2b2	1
9.98513e-21	0.284914	0.216	0.104	1.97755e-16	Fkbp15	1
4.63953e-27	0.284247	0.816	0.733	9.1886e-23	Cd300lf	1
2.01413e-17	0.284104	0.363	0.247	3.98898e-13	Mthfs	1
1.15316e-22	0.281103	0.328	0.176	2.28383e-18	Fnip1	1
6.74184e-20	0.28092	0.538	0.449	1.33522e-15	Rnf11	1
1.44443e-20	0.280377	0.694	0.559	2.86069e-16	Tlr2	1
1.24235e-19	0.278659	0.529	0.382	2.46048e-15	Nfkb2	1
3.70212e-23	0.278643	0.155	0.055	7.33206e-19	Fbxo30	1
2.15957e-23	0.278471	0.231	0.121	4.27704e-19	Srebf2	1
1.26027e-20	0.277604	0.203	0.089	2.49597e-16	Rnd1	1
1.26759e-30	0.277549	0.166	0.048	2.51047e-26	P2ry2	1
3.58022e-27	0.277443	0.16	0.057	7.09062e-23	Cndp2	1
4.61661e-18	0.277436	0.545	0.47	9.14319e-14	Atp6v1f	1
5.88452e-16	0.276236	0.511	0.402	1.16543e-11	Npc2	1
3.71444e-18	0.276085	0.451	0.327	7.35645e-14	Vapa	1
2.67171e-17	0.276077	0.284	0.188	5.29133e-13	Ywhah	1
7.14338e-19	0.275248	0.236	0.134	1.41475e-14	Hk1	1
1.62291e-16	0.274719	0.277	0.169	3.21417e-12	P4ha1	1
3.88518e-23	0.274141	0.208	0.089	7.69459e-19	Kansl3	1
3.67328e-09	0.274126	0.104	0.085	7.27493e-05	Gadd45g	1
4.26444e-17	0.274109	0.426	0.311	8.44573e-13	Bcl3	1
3.92014e-12	0.273455	0.238	0.156	7.76383e-08	Hsp90b1	1
5.20793e-19	0.273262	0.297	0.175	1.03143e-14	Col4a3bp	1
5.63341e-15	0.272946	0.299	0.207	1.1157e-10	Cnih4	1
1.6685e-27	0.27227	0.214	0.081	3.30445e-23	Dtnbp1	1
2.82806e-18	0.271892	0.205	0.098	5.60096e-14	Tmem251	1
3.30864e-20	0.271019	0.252	0.134	6.55276e-16	Acbd3	1
9.67758e-23	0.270959	0.265	0.132	1.91664e-18	Pttg1ip	1
2.10823e-26	0.269732	0.139	0.041	4.17536e-22	Bbc3	1
2.87206e-20	0.269503	0.554	0.397	5.68811e-16	Snx10	1
3.65594e-18	0.26877	0.457	0.319	7.24059e-14	Erbin	1
6.48035e-19	0.267973	0.141	0.053	1.28343e-14	Ccdc126	1
2.0378e-17	0.266798	0.186	0.083	4.03587e-13	Mtdh	1
3.44373e-21	0.266725	0.265	0.143	6.8203e-17	Vps35	1
1.62731e-15	0.264874	0.107	0.037	3.22288e-11	Pou2f2	1
2.20741e-12	0.264693	0.778	0.699	4.37178e-08	Tnfaip3	1
8.32948e-15	0.264061	0.385	0.27	1.64965e-10	Psme2	1
9.51025e-20	0.2633	0.491	0.359	1.8835e-15	Zfand3	1
2.44126e-21	0.262774	0.843	0.792	4.83492e-17	Tax1bp1	1
3.54491e-21	0.262675	0.682	0.533	7.0207e-17	Atp2b1	1
1.92418e-19	0.26224	0.66	0.525	3.81084e-15	Vps4b	1
1.06193e-14	0.26216	0.231	0.137	2.10316e-10	Spcs2	1
5.38739e-18	0.260857	0.687	0.566	1.06697e-13	Slc3a2	1
1.12558e-14	0.260489	0.429	0.306	2.22922e-10	Klf13	1
8.1362e-19	0.259983	0.234	0.119	1.61137e-14	Ewsr1	1
1.91625e-16	0.258734	0.404	0.3	3.79514e-12	Gpat3	1
1.32373e-34	0.258619	0.112	0.017	2.62165e-30	9130230L23Rik	1
3.00274e-24	0.254919	0.174	0.063	5.94694e-20	Nfe2l1	1
2.47644e-32	0.25434	0.977	0.95	4.9046e-28	B2m	1
4.56608e-36	0.254237	0.109	0.015	9.04313e-32	Slc43a3	1
3.13015e-16	0.253464	0.437	0.308	6.19926e-12	Hnrnph2	1
5.37879e-15	0.253244	0.307	0.203	1.06527e-10	Krcc1	1
3.57208e-19	0.251585	0.544	0.408	7.0745e-15	Snx3	1
1.28055e-15	0.250967	0.346	0.224	2.53612e-11	Mthfsl	1
2.49536e-22	0.250895	0.189	0.075	4.94206e-18	Dgkz	1
8.9527e-31	0.250154	0.14	0.033	1.77308e-26	Dtx4	1

## Sheet: 2
p_val	avg_logFC	pct.1	pct.2	p_val_adj	gene	cluster		source	term_name	term_id	highlighted	adjusted_p_value	negative_log10_of_adjusted_p_value	term_size	query_size	intersection_size	effective_domain_size	intersections
7.24396e-107	0.681446	0.957	0.812	1.43467e-102	Thbs1	2		GO:MF	protein binding	GO:0005515	TRUE	9.17974e-06	5.03717	10460	48	39	25063	THBS1,STFA2L1,IL1B,FPR1,PTGS2,S100A11,SLC2A3,CXCL3,MXI1,PDE4B,MMP9,HDC,MCEMP1,SELL,TPM4,ENTPD1,TAGLN2,S100A9,TGM2,LCP1,CD93,SUB1,CLEC5A,IL1R2,PHLDA1,LRG1,ADAM8,CHD1,RHOH,TGFBI,LYZ2,ARPC3,DGAT1,CSTDC4,CYTH1,CCL6,PILRA,EIF4G2,GRINA
7.01578e-71	0.584653	0.838	0.589	1.38947e-66	Rdh12	2		GO:MF	calcium ion binding	GO:0005509	TRUE	0.00298841	2.52456	719	48	9	25063	THBS1,S100A11,SELENON,SELL,S100A9,TGM2,LCP1,CD93,ADAM8
8.01658e-88	0.528469	0.994	0.916	1.58768e-83	G0s2	2		GO:MF	cell adhesion molecule binding	GO:0050839	FALSE	0.00749043	2.12549	292	48	6	25063	THBS1,IL1B,SELL,LCP1,ADAM8,TGFBI
1.63721e-65	0.52719	0.971	0.89	3.24249e-61	Ifitm1	2		GO:MF	binding	GO:0005488	FALSE	0.0466605	1.33105	16378	48	43	25063	THBS1,STFA2L1,NKTR,IL1B,ANTXR2,FPR1,PTGS2,S100A11,SLC2A3,CXCL3,MXI1,PDE4B,SELENON,MMP9,HDC,MCEMP1,SELL,TPM4,ENTPD1,TAGLN2,S100A9,TGM2,LCP1,CD93,SLC27A4,SUB1,CLEC5A,IL1R2,PHLDA1,LRG1,ADAM8,CHD1,RHOH,TGFBI,LYZ2,ARPC3,DGAT1,CSTDC4,CYTH1,CCL6,PILRA,EIF4G2,GRINA
4.88175e-88	0.479255	0.962	0.802	9.66831e-84	Slc16a3	2		GO:BP	neutrophil migration	GO:1990266	TRUE	6.23829e-06	5.20493	126	50	7	26944	IL1B,CXCL3,PDE4B,SELL,S100A9,ADAM8,CCL6
7.84291e-13	0.461514	0.473	0.412	1.55329e-08	Stfa2l1	2		GO:BP	cell chemotaxis	GO:0060326	FALSE	1.2595e-05	4.8998	321	50	9	26944	THBS1,IL1B,CXCL3,PDE4B,MMP9,SELL,S100A9,ADAM8,CCL6
1.1791e-25	0.445168	0.363	0.205	2.3352e-21	Ss18l2	2		GO:BP	leukocyte chemotaxis	GO:0030595	FALSE	1.69858e-05	4.76991	229	50	8	26944	IL1B,CXCL3,PDE4B,MMP9,SELL,S100A9,ADAM8,CCL6
6.27551e-30	0.440175	0.796	0.668	1.24287e-25	Nktr	2		GO:BP	chemotaxis	GO:0006935	FALSE	1.71412e-05	4.76596	455	50	10	26944	THBS1,IL1B,FPR1,CXCL3,PDE4B,MMP9,SELL,S100A9,ADAM8,CCL6
2.24822e-73	0.433379	1	0.987	4.45259e-69	Il1b	2		GO:BP	taxis	GO:0042330	FALSE	1.78688e-05	4.7479	457	50	10	26944	THBS1,IL1B,FPR1,CXCL3,PDE4B,MMP9,SELL,S100A9,ADAM8,CCL6
4.73094e-44	0.423193	0.696	0.473	9.36963e-40	Antxr2	2		GO:BP	myeloid leukocyte migration	GO:0097529	FALSE	2.14821e-05	4.66792	236	50	8	26944	IL1B,CXCL3,PDE4B,MMP9,SELL,S100A9,ADAM8,CCL6
2.19973e-39	0.41404	0.854	0.687	4.35656e-35	Fpr1	2		GO:BP	granulocyte migration	GO:0097530	FALSE	2.41039e-05	4.61791	153	50	7	26944	IL1B,CXCL3,PDE4B,SELL,S100A9,ADAM8,CCL6
3.0555e-55	0.413805	0.884	0.661	6.05142e-51	Ptgs2	2		GO:BP	neutrophil chemotaxis	GO:0030593	FALSE	6.66831e-05	4.17598	103	50	6	26944	IL1B,CXCL3,PDE4B,SELL,S100A9,CCL6
2.03378e-87	0.395852	0.993	0.937	4.0279e-83	S100a11	2		GO:BP	granulocyte chemotaxis	GO:0071621	FALSE	0.000222408	3.65285	126	50	6	26944	IL1B,CXCL3,PDE4B,SELL,S100A9,CCL6
2.78928e-17	0.379804	0.527	0.385	5.52417e-13	Slc2a3	2		GO:BP	positive regulation of apoptotic process	GO:0043065	TRUE	0.000319427	3.49563	622	50	10	26944	THBS1,G0S2,IL1B,PTGS2,MMP9,S100A9,TGM2,SLC27A4,PHLDA1,ADAM8
6.19768e-49	0.366147	0.905	0.714	1.22745e-44	Cxcl3	2		GO:BP	positive regulation of programmed cell death	GO:0043068	FALSE	0.000427475	3.36909	642	50	10	26944	THBS1,G0S2,IL1B,PTGS2,MMP9,S100A9,TGM2,SLC27A4,PHLDA1,ADAM8
2.01502e-20	0.35306	0.366	0.228	3.99076e-16	Mxi1	2		GO:BP	locomotion	GO:0040011	TRUE	0.000679643	3.16772	1273	50	13	26944	THBS1,IFITM1,IL1B,FPR1,PTGS2,S100A11,CXCL3,PDE4B,MMP9,SELL,S100A9,ADAM8,CCL6
2.08161e-42	0.351443	0.83	0.615	4.12263e-38	Pde4b	2		GO:BP	leukocyte migration	GO:0050900	FALSE	0.00079889	3.09751	378	50	8	26944	IL1B,CXCL3,PDE4B,MMP9,SELL,S100A9,ADAM8,CCL6
1.24623e-36	0.350415	0.616	0.384	2.46816e-32	Selenon	2		GO:BP	cell migration	GO:0016477	FALSE	0.000882494	3.05429	1538	50	14	26944	THBS1,IFITM1,IL1B,PTGS2,S100A11,CXCL3,PDE4B,MMP9,SELL,S100A9,LCP1,LRG1,ADAM8,CCL6
2.64063e-67	0.338639	0.889	0.602	5.22977e-63	Mmp9	2		GO:BP	regulation of apoptotic process	GO:0042981	FALSE	0.00216906	2.66373	1658	50	14	26944	THBS1,G0S2,IL1B,PTGS2,SLC2A3,MMP9,SELL,S100A9,TGM2,SLC27A4,CLEC5A,PHLDA1,ADAM8,GRINA
9.59575e-55	0.324114	0.977	0.881	1.90044e-50	Hdc	2		GO:BP	regulation of proteolysis	GO:0030162	TRUE	0.0022919	2.6398	435	50	8	26944	THBS1,STFA2L1,IL1B,PTGS2,S100A9,IL1R2,ADAM8,CSTDC4
3.47075e-42	0.323428	0.905	0.724	6.87383e-38	Mcemp1	2		GO:BP	regulation of programmed cell death	GO:0043067	FALSE	0.00306317	2.51383	1707	50	14	26944	THBS1,G0S2,IL1B,PTGS2,SLC2A3,MMP9,SELL,S100A9,TGM2,SLC27A4,CLEC5A,PHLDA1,ADAM8,GRINA
4.03773e-57	0.317825	0.985	0.914	7.99673e-53	Cd52	2		GO:BP	cell adhesion	GO:0007155	TRUE	0.00329927	2.48158	1465	50	13	26944	THBS1,STFA2L1,IL1B,SELL,S100A9,TGM2,CD93,LRG1,ADAM8,RHOH,TGFBI,CSTDC4,CYTH1
2.91311e-46	0.317569	0.796	0.541	5.76941e-42	Sell	2		GO:BP	cell motility	GO:0048870	FALSE	0.00439122	2.35741	1760	50	14	26944	THBS1,IFITM1,IL1B,PTGS2,S100A11,CXCL3,PDE4B,MMP9,SELL,S100A9,LCP1,LRG1,ADAM8,CCL6
4.10466e-39	0.315533	0.807	0.59	8.12928e-35	Tpm4	2		GO:BP	positive regulation of multicellular organismal process	GO:0051240	TRUE	0.00586366	2.23183	1804	50	14	26944	THBS1,G0S2,IL1B,PTGS2,PDE4B,MMP9,S100A9,TGM2,CLEC5A,LRG1,ADAM8,RHOH,DGAT1,EIF4G2
4.13917e-30	0.314802	0.763	0.589	8.19762e-26	Entpd1	2		GO:BP	response to external stimulus	GO:0009605	FALSE	0.00763374	2.11726	3042	50	18	26944	THBS1,IFITM1,IL1B,FPR1,PTGS2,CXCL3,PDE4B,MMP9,CD52,SELL,S100A9,SLC27A4,CLEC5A,LRG1,ADAM8,WFDC17,LYZ2,CCL6
7.7474e-15	0.31105	0.521	0.385	1.53437e-10	Tagln2	2		GO:BP	leukocyte aggregation	GO:0070486	TRUE	0.00859104	2.06595	18	50	3	26944	IL1B,S100A9,ADAM8
8.54149e-56	0.311044	1	0.997	1.69164e-51	S100a9	2		GO:BP	biological process involved in interspecies interaction between organisms	GO:0044419	FALSE	0.0136096	1.86616	1940	50	14	26944	IFITM1,IL1B,PTGS2,CXCL3,PDE4B,CD52,S100A9,CLEC5A,LRG1,ADAM8,CHD1,WFDC17,LYZ2,CCL6
1.41007e-26	0.310018	0.802	0.641	2.79264e-22	Tgm2	2		GO:BP	positive regulation of transforming growth factor beta production	GO:0071636	TRUE	0.0161289	1.7924	22	50	3	26944	THBS1,PTGS2,ADAM8
1.23832e-49	0.305657	0.975	0.877	2.45249e-45	Lcp1	2		GO:BP	negative regulation of proteolysis	GO:0045861	FALSE	0.0175706	1.75521	154	50	5	26944	THBS1,STFA2L1,PTGS2,IL1R2,CSTDC4
1.39626e-18	0.304148	0.346	0.207	2.76529e-14	Cd93	2		GO:BP	regulation of apoptotic signaling pathway	GO:2001233	FALSE	0.0203235	1.692	417	50	7	26944	THBS1,G0S2,IL1B,PTGS2,MMP9,S100A9,GRINA
1.0514e-23	0.303077	0.402	0.242	2.08229e-19	Slc27a4	2		GO:BP	apoptotic process	GO:0006915	FALSE	0.0255356	1.59285	2050	50	14	26944	THBS1,G0S2,IL1B,PTGS2,SLC2A3,MMP9,SELL,S100A9,TGM2,SLC27A4,CLEC5A,PHLDA1,ADAM8,GRINA
5.40866e-21	0.301352	0.768	0.621	1.07119e-16	Sub1	2		GO:BP	response to other organism	GO:0051707	FALSE	0.0271894	1.5656	1778	50	13	26944	IFITM1,IL1B,PTGS2,CXCL3,PDE4B,CD52,S100A9,CLEC5A,LRG1,ADAM8,WFDC17,LYZ2,CCL6
4.50871e-17	0.298464	0.418	0.285	8.9295e-13	Clec5a	2		GO:BP	response to external biotic stimulus	GO:0043207	FALSE	0.0278486	1.5552	1782	50	13	26944	IFITM1,IL1B,PTGS2,CXCL3,PDE4B,CD52,S100A9,CLEC5A,LRG1,ADAM8,WFDC17,LYZ2,CCL6
1.27571e-50	0.297331	0.96	0.797	2.52654e-46	Il1r2	2		GO:BP	inflammatory response	GO:0006954	TRUE	0.0286972	1.54216	811	50	9	26944	THBS1,IL1B,FPR1,PTGS2,CXCL3,S100A9,IL1R2,ADAM8,CCL6
8.21807e-18	0.297113	0.502	0.352	1.62759e-13	Phlda1	2		GO:BP	defense response	GO:0006952	FALSE	0.0332595	1.47808	1812	50	13	26944	THBS1,IFITM1,IL1B,FPR1,PTGS2,CXCL3,S100A9,CLEC5A,IL1R2,ADAM8,WFDC17,LYZ2,CCL6
2.88567e-43	0.296438	0.859	0.63	5.71506e-39	Lrg1	2		GO:BP	response to biotic stimulus	GO:0009607	FALSE	0.0346482	1.46032	1819	50	13	26944	IFITM1,IL1B,PTGS2,CXCL3,PDE4B,CD52,S100A9,CLEC5A,LRG1,ADAM8,WFDC17,LYZ2,CCL6
4.52252e-23	0.295684	0.719	0.556	8.95684e-19	Adam8	2		GO:BP	programmed cell death	GO:0012501	FALSE	0.0382957	1.41685	2125	50	14	26944	THBS1,G0S2,IL1B,PTGS2,SLC2A3,MMP9,SELL,S100A9,TGM2,SLC27A4,CLEC5A,PHLDA1,ADAM8,GRINA
8.85798e-16	0.291624	0.392	0.279	1.75432e-11	Chd1	2		GO:BP	cell death	GO:0008219	FALSE	0.0382957	1.41685	2125	50	14	26944	THBS1,G0S2,IL1B,PTGS2,SLC2A3,MMP9,SELL,S100A9,TGM2,SLC27A4,CLEC5A,PHLDA1,ADAM8,GRINA
2.29403e-17	0.291239	0.284	0.16	4.54334e-13	Rhoh	2		GO:BP	epithelial cell migration	GO:0010631	TRUE	0.045617	1.34087	316	50	6	26944	THBS1,PTGS2,MMP9,S100A9,LRG1,ADAM8
6.60946e-26	0.290526	0.656	0.457	1.309e-21	Tgfbi	2		GO:BP	epithelium migration	GO:0090132	FALSE	0.0480971	1.31788	319	50	6	26944	THBS1,PTGS2,MMP9,S100A9,LRG1,ADAM8
1.40703e-29	0.286744	0.975	0.927	2.78663e-25	Wfdc17	2		GO:CC	extracellular space	GO:0005615	TRUE	0.000119315	3.9233	1836	49	15	26995	THBS1,STFA2L1,IL1B,S100A11,CXCL3,MMP9,SELL,ENTPD1,S100A9,LRG1,TGFBI,WFDC17,LYZ2,CSTDC4,CCL6
1.60377e-22	0.282231	0.905	0.793	3.17626e-18	Lyz2	2		GO:CC	cell periphery	GO:0071944	TRUE	0.000133758	3.87368	6862	49	29	26995	THBS1,IFITM1,SLC16A3,STFA2L1,NKTR,ANTXR2,FPR1,PTGS2,S100A11,SLC2A3,PDE4B,MMP9,CD52,SELL,TPM4,ENTPD1,S100A9,TGM2,LCP1,CD93,SLC27A4,CLEC5A,IL1R2,LRG1,ADAM8,RHOH,TGFBI,CSTDC4,CYTH1
3.75479e-47	0.281835	0.966	0.878	7.43635e-43	Arpc3	2		GO:CC	extracellular region	GO:0005576	FALSE	0.000295909	3.52884	2554	49	17	26995	THBS1,STFA2L1,IL1B,S100A11,CXCL3,MMP9,SELL,ENTPD1,S100A9,TGM2,IL1R2,LRG1,TGFBI,WFDC17,LYZ2,CSTDC4,CCL6
1.26366e-27	0.27401	0.673	0.47	2.50267e-23	Dgat1	2		GO:CC	plasma membrane	GO:0005886	FALSE	0.00662086	2.17909	6367	49	25	26995	THBS1,IFITM1,SLC16A3,STFA2L1,NKTR,ANTXR2,FPR1,PTGS2,SLC2A3,PDE4B,CD52,SELL,ENTPD1,S100A9,TGM2,LCP1,CD93,SLC27A4,CLEC5A,IL1R2,LRG1,ADAM8,RHOH,CSTDC4,CYTH1
0.000421688	0.273375	0.418	0.394	1	Cstdc4	2		GO:CC	podosome	GO:0002102	TRUE	0.00990773	2.00403	37	49	3	26995	TPM4,LCP1,ADAM8
8.90676e-21	0.266677	0.5	0.33	1.76398e-16	Cyth1	2		GO:CC	cytoplasm	GO:0005737	FALSE	0.0112642	1.9483	11561	49	35	26995	THBS1,G0S2,IFITM1,STFA2L1,NKTR,IL1B,FPR1,PTGS2,S100A11,SLC2A3,MXI1,PDE4B,SELENON,HDC,TPM4,ENTPD1,S100A9,TGM2,LCP1,CD93,SLC27A4,CLEC5A,IL1R2,PHLDA1,ADAM8,CHD1,RHOH,TGFBI,LYZ2,ARPC3,DGAT1,CSTDC4,CYTH1,EIF4G2,GRINA
9.7221e-26	0.26372	0.876	0.738	1.92546e-21	Ccl6	2		GO:CC	cornified envelope	GO:0001533	FALSE	0.0403058	1.39463	59	49	3	26995	STFA2L1,S100A9,CSTDC4
1.38661e-22	0.262819	0.68	0.503	2.74617e-18	Pilra	2		GO:CC	cellular anatomical entity	GO:0110165	FALSE	0.0435847	1.36067	22653	49	49	26995	THBS1,RDH12,G0S2,IFITM1,SLC16A3,STFA2L1,NKTR,IL1B,ANTXR2,FPR1,PTGS2,S100A11,SLC2A3,CXCL3,MXI1,PDE4B,SELENON,MMP9,HDC,MCEMP1,CD52,SELL,TPM4,ENTPD1,TAGLN2,S100A9,TGM2,LCP1,CD93,SLC27A4,SUB1,CLEC5A,IL1R2,PHLDA1,LRG1,ADAM8,CHD1,RHOH,TGFBI,WFDC17,LYZ2,ARPC3,DGAT1,CSTDC4,CYTH1,CCL6,PILRA,EIF4G2,GRINA
2.02722e-14	0.262719	0.573	0.456	4.01491e-10	Eif4g2	2		KEGG	IL-17 signaling pathway	KEGG:04657	FALSE	0.000410543	3.38664	93	27	5	9330	IL1B,PTGS2,CXCL3,MMP9,S100A9
5.45184e-41	0.262608	0.976	0.897	1.07974e-36	Grina	2		KEGG	TNF signaling pathway	KEGG:04668	FALSE	0.0211517	1.67465	115	27	4	9330	IL1B,PTGS2,CXCL3,MMP9
4.41225e-32	0.262098	0.904	0.748	8.73846e-28	Tspo	2
1.17043e-47	0.26095	0.999	0.994	2.31803e-43	S100a8	2
1.40902e-13	0.258855	0.378	0.252	2.79057e-09	Isy1	2
1.0941e-16	0.257262	0.474	0.32	2.16686e-12	Ly6g	2
1.93291e-18	0.257096	0.762	0.642	3.82812e-14	Arf4	2
5.69704e-12	0.256576	0.214	0.132	1.1283e-07	Rdh11	2
5.63328e-29	0.256153	0.955	0.875	1.11567e-24	Trem1	2
8.10685e-12	0.255719	0.309	0.21	1.60556e-07	Crlf3	2
1.03691e-15	0.254282	0.379	0.248	2.0536e-11	Fosl1	2
4.06167e-19	0.253672	0.834	0.731	8.04413e-15	Lamp2	2
5.6569e-18	0.252568	0.649	0.494	1.12035e-13	Timp2	2
4.06639e-38	0.252241	0.993	0.964	8.05348e-34	Actg1	2

## Sheet: 3
p_val	avg_logFC	cluster 3	other clusters	p_val_adj	gene	cluster		source	term_name	term_id	highlighted	adjusted_p_value	negative_log10_of_adjusted_p_value	term_size	query_size	intersection_size	effective_domain_size	intersections
1.75998e-258	1.27696	0.912	0.546	3.48564e-254	Ifitm6	3		GO:MF	calcium-dependent protein binding	GO:0048306	TRUE	1.30986e-07	6.88278	88	48	7	25063	CD177,ANXA1,S100A8,PDCD6,S100A9,S100A6,S100A11
2.12691e-151	1.23226	0.656	0.233	4.21234e-147	Ngp	3		GO:MF	protein binding	GO:0005515	FALSE	9.17974e-06	5.03717	10460	48	39	25063	MMP8,RETNLG,CD177,ANXA1,LY6G,PGLYRP1,PROK2,ARHGDIB,S100A8,TKT,ALOX5AP,LY6C2,MMP9,TSPO,CNN2,MGST1,PDCD6,S100A9,ALDH2,S100A6,ATXN10,FLNA,LBR,HACD4,S100A11,VIM,LRG1,FIS1,TAGLN2,CCND3,GYG,GLIPR2,TMSB4X,PNKP,ITM2B,GPI1,MYL6,G6PDX,LYZ2
1.42449e-238	1.18875	0.879	0.419	2.8212e-234	Mmp8	3		GO:MF	identical protein binding	GO:0042802	TRUE	0.00034121	3.46698	2369	48	17	25063	ANXA1,TKT,ALOX5AP,MMP9,MGST1,PDCD6,ALDH2,S100A6,ATXN10,FLNA,S100A11,VIM,FIS1,GYG,GLIPR2,G6PDX,LYZ2
7.17726e-194	1.07402	0.989	0.876	1.42146e-189	Retnlg	3		GO:MF	calcium ion binding	GO:0005509	TRUE	0.00298841	2.52456	719	48	9	25063	MMP8,ANXA1,S100A8,TKT,PDCD6,S100A9,S100A6,S100A11,MYL6
1.68944e-176	1.04709	0.646	0.194	3.34594e-172	Cd177	3		GO:MF	antioxidant activity	GO:0016209	TRUE	0.00868398	2.06128	86	48	4	25063	S100A8,ALOX5AP,MGST1,S100A9
5.79962e-214	1.02429	0.887	0.459	1.14862e-209	Anxa1	3		GO:MF	monosaccharide binding	GO:0048029	TRUE	0.0103906	1.98336	90	48	4	25063	TKT,GYG,GPI1,G6PDX
1.4923e-149	0.972734	0.719	0.273	2.95549e-145	Ly6g	3		GO:MF	molecular function regulator activity	GO:0098772	TRUE	0.0390072	1.40885	2074	48	13	25063	NGP,RETNLG,ANXA1,LY6G,PGLYRP1,WFDC21,ARHGDIB,ALOX5AP,LY6C2,FLNA,LRG1,CCND3,GPI1
6.56983e-232	0.94651	0.95	0.647	1.30116e-227	Pglyrp1	3		GO:MF	protein homodimerization activity	GO:0042803	FALSE	0.0434765	1.36175	786	48	8	25063	TKT,PDCD6,S100A6,FLNA,S100A11,GYG,GLIPR2,G6PDX
3.79074e-110	0.90131	0.547	0.171	7.50756e-106	Prok2	3		GO:MF	binding	GO:0005488	FALSE	0.0466605	1.33105	16378	48	43	25063	MMP8,RETNLG,CD177,ANXA1,LY6G,PGLYRP1,PROK2,R3HDM4,ARHGDIB,S100A8,TKT,ALOX5AP,LY6C2,MMP9,TSPO,CNN2,MGST1,PDCD6,S100A9,ALDH2,S100A6,ATXN10,FLNA,LBR,HACD4,S100A11,VIM,LRG1,QSOX1,FIS1,TAGLN2,CCND3,GYG,SMPDL3A,GLIPR2,TMSB4X,PNKP,ITM2B,GPI1,MYL6,MAPK13,G6PDX,LYZ2
6.24724e-193	0.792353	0.974	0.804	1.23726e-188	Wfdc21	3		GO:BP	cell migration	GO:0016477	TRUE	1.29837e-06	5.8866	1538	49	17	26944	RETNLG,CD177,ANXA1,ARHGDIB,S100A8,MMP9,TSPO,CNN2,PDCD6,S100A9,FLNA,S100A11,VIM,LRG1,GLIPR2,TMSB4X,GPI1
2.66673e-156	0.784187	0.776	0.313	5.28146e-152	R3hdm4	3		GO:BP	locomotion	GO:0040011	FALSE	7.17284e-06	5.14431	1273	49	15	26944	RETNLG,ANXA1,PROK2,ARHGDIB,S100A8,MMP9,CNN2,PDCD6,S100A9,FLNA,S100A11,VIM,GLIPR2,TMSB4X,GPI1
8.22864e-172	0.756503	0.934	0.631	1.62968e-167	Arhgdib	3		GO:BP	cell motility	GO:0048870	FALSE	9.99215e-06	5.00034	1760	49	17	26944	RETNLG,CD177,ANXA1,ARHGDIB,S100A8,MMP9,TSPO,CNN2,PDCD6,S100A9,FLNA,S100A11,VIM,LRG1,GLIPR2,TMSB4X,GPI1
4.23371e-163	0.742387	0.999	0.994	8.38487e-159	S100a8	3		GO:BP	response to oxygen-containing compound	GO:1901700	TRUE	1.68229e-05	4.7741	2077	49	18	26944	MMP8,ANXA1,LY6G,WFDC21,S100A8,LY6C2,MMP9,TSPO,MGST1,S100A9,ALDH2,FLNA,VIM,FIS1,CCND3,GPI1,MAPK13,G6PDX
9.65626e-130	0.717885	0.661	0.242	1.91242e-125	Tkt	3		GO:BP	response to stress	GO:0006950	TRUE	2.16498e-05	4.66455	3936	49	24	26944	IFITM6,NGP,MMP8,CD177,ANXA1,PGLYRP1,WFDC21,S100A8,ALOX5AP,MMP9,TSPO,CNN2,MGST1,PDCD6,S100A9,FLNA,VIM,LRG1,FIS1,PNKP,GPI1,MAPK13,G6PDX,LYZ2
2.11623e-192	0.716073	0.987	0.85	4.1912e-188	Alox5ap	3		GO:BP	response to external stimulus	GO:0009605	FALSE	0.000199316	3.70046	3042	49	20	26944	IFITM6,MMP8,RETNLG,CD177,ANXA1,PGLYRP1,PROK2,WFDC21,S100A8,ALOX5AP,MMP9,TSPO,CNN2,MGST1,S100A9,FLNA,VIM,LRG1,GPI1,LYZ2
3.74048e-107	0.71418	0.729	0.338	7.40802e-103	Ly6c2	3		GO:BP	myeloid leukocyte migration	GO:0097529	FALSE	0.000391839	3.40689	236	49	7	26944	RETNLG,CD177,ANXA1,S100A8,MMP9,CNN2,S100A9
6.71236e-140	0.701126	0.923	0.597	1.32938e-135	Mmp9	3		GO:BP	regulation of cell migration	GO:0030334	FALSE	0.00205072	2.68809	984	49	11	26944	ANXA1,ARHGDIB,MMP9,CNN2,PDCD6,FLNA,S100A11,VIM,GLIPR2,TMSB4X,GPI1
1.68405e-140	0.680495	0.917	0.618	3.33526e-136	Prr13	3		GO:BP	ameboidal-type cell migration	GO:0001667	FALSE	0.00227148	2.64369	446	49	8	26944	ANXA1,ARHGDIB,MMP9,PDCD6,S100A9,LRG1,GLIPR2,GPI1
1.53668e-163	0.6803	0.96	0.738	3.04339e-159	Tspo	3		GO:BP	epithelial cell migration	GO:0010631	FALSE	0.00277276	2.55709	316	49	7	26944	ANXA1,MMP9,PDCD6,S100A9,LRG1,GLIPR2,GPI1
5.36245e-116	0.659786	0.698	0.297	1.06203e-111	Cnn2	3		GO:BP	epithelium migration	GO:0090132	FALSE	0.00295208	2.52987	319	49	7	26944	ANXA1,MMP9,PDCD6,S100A9,LRG1,GLIPR2,GPI1
5.54018e-111	0.655357	0.79	0.39	1.09723e-106	Mgst1	3		GO:BP	tissue migration	GO:0090130	FALSE	0.00333997	2.47626	325	49	7	26944	ANXA1,MMP9,PDCD6,S100A9,LRG1,GLIPR2,GPI1
5.69361e-91	0.654905	0.608	0.257	1.12762e-86	Pdcd6	3		GO:BP	regulation of cell motility	GO:2000145	FALSE	0.00367735	2.43447	1045	49	11	26944	ANXA1,ARHGDIB,MMP9,CNN2,PDCD6,FLNA,S100A11,VIM,GLIPR2,TMSB4X,GPI1
8.3075e-136	0.654577	1	0.997	1.6453e-131	S100a9	3		GO:BP	cellular detoxification	GO:1990748	FALSE	0.00471783	2.32626	121	49	5	26944	S100A8,ALOX5AP,MGST1,S100A9,ALDH2
4.47597e-113	0.643621	0.57	0.183	8.86467e-109	Aldh2	3		GO:BP	regulation of locomotion	GO:0040012	FALSE	0.00547168	2.26188	1089	49	11	26944	ANXA1,ARHGDIB,MMP9,CNN2,PDCD6,FLNA,S100A11,VIM,GLIPR2,TMSB4X,GPI1
2.87812e-117	0.619896	0.988	0.943	5.70012e-113	S100a6	3		GO:BP	response to organic substance	GO:0010033	FALSE	0.00680147	2.1674	3435	49	19	26944	IFITM6,MMP8,ANXA1,LY6G,WFDC21,S100A8,LY6C2,MMP9,TSPO,MGST1,S100A9,ALDH2,FLNA,VIM,FIS1,CCND3,GPI1,MAPK13,G6PDX
4.4753e-96	0.589622	0.636	0.263	8.86333e-92	Atxn10	3		GO:BP	cellular response to toxic substance	GO:0097237	FALSE	0.00723184	2.14075	132	49	5	26944	S100A8,ALOX5AP,MGST1,S100A9,ALDH2
8.67407e-98	0.586678	0.662	0.282	1.7179e-93	Flna	3		GO:BP	leukocyte migration	GO:0050900	FALSE	0.00902512	2.04455	378	49	7	26944	RETNLG,CD177,ANXA1,S100A8,MMP9,CNN2,S100A9
7.82685e-109	0.577881	0.704	0.293	1.55011e-104	Lbr	3		GO:BP	cellular response to chemical stimulus	GO:0070887	FALSE	0.00916851	2.0377	3162	49	18	26944	IFITM6,MMP8,RETNLG,ANXA1,LY6G,S100A8,ALOX5AP,LY6C2,MMP9,TSPO,MGST1,S100A9,ALDH2,FLNA,VIM,FIS1,MAPK13,G6PDX
1.79144e-99	0.575307	0.583	0.209	3.54794e-95	Hacd4	3		GO:BP	detoxification	GO:0098754	FALSE	0.00964306	2.01578	140	49	5	26944	S100A8,ALOX5AP,MGST1,S100A9,ALDH2
9.95913e-140	0.558266	0.998	0.937	1.97241e-135	S100a11	3		GO:BP	response to bacterium	GO:0009617	FALSE	0.0135527	1.86798	968	49	10	26944	MMP8,PGLYRP1,WFDC21,S100A8,TSPO,MGST1,S100A9,VIM,LRG1,LYZ2
2.12111e-69	0.547521	0.795	0.506	4.20086e-65	Vim	3		GO:BP	positive regulation of cell migration	GO:0030335	FALSE	0.0151242	1.82033	577	49	8	26944	ANXA1,MMP9,PDCD6,FLNA,S100A11,GLIPR2,TMSB4X,GPI1
9.88773e-104	0.545372	0.929	0.618	1.95827e-99	Lrg1	3		GO:BP	positive regulation of epithelial cell migration	GO:0010634	FALSE	0.0168445	1.77354	157	49	5	26944	ANXA1,MMP9,PDCD6,GLIPR2,GPI1
2.11344e-68	0.523113	0.605	0.289	4.18567e-64	Qsox1	3		GO:BP	cellular response to oxygen-containing compound	GO:1901701	FALSE	0.0193201	1.71399	1497	49	12	26944	MMP8,ANXA1,LY6G,LY6C2,MMP9,TSPO,MGST1,ALDH2,FLNA,VIM,FIS1,MAPK13
4.10281e-103	0.515929	0.948	0.781	8.12561e-99	Sh3bgrl3	3		GO:BP	response to other organism	GO:0051707	FALSE	0.0206684	1.68469	1778	49	13	26944	IFITM6,MMP8,CD177,ANXA1,PGLYRP1,WFDC21,S100A8,TSPO,MGST1,S100A9,VIM,LRG1,LYZ2
5.25777e-81	0.51279	0.701	0.352	1.0413e-76	Fis1	3		GO:BP	response to external biotic stimulus	GO:0043207	FALSE	0.0211725	1.67423	1782	49	13	26944	IFITM6,MMP8,CD177,ANXA1,PGLYRP1,WFDC21,S100A8,TSPO,MGST1,S100A9,VIM,LRG1,LYZ2
7.53896e-38	0.507685	0.595	0.371	1.49309e-33	Tagln2	3		GO:BP	positive regulation of cell motility	GO:2000147	FALSE	0.0218288	1.66097	607	49	8	26944	ANXA1,MMP9,PDCD6,FLNA,S100A11,GLIPR2,TMSB4X,GPI1
2.75825e-83	0.506402	0.598	0.247	5.46272e-79	Ccnd3	3		GO:BP	response to nitrogen compound	GO:1901698	TRUE	0.0258508	1.58753	1283	49	11	26944	ANXA1,LY6G,LY6C2,MMP9,TSPO,MGST1,FLNA,VIM,FIS1,CCND3,MAPK13
2.0381e-71	0.498255	0.474	0.176	4.03645e-67	Gyg	3		GO:BP	response to biotic stimulus	GO:0009607	FALSE	0.0263768	1.57878	1819	49	13	26944	IFITM6,MMP8,CD177,ANXA1,PGLYRP1,WFDC21,S100A8,TSPO,MGST1,S100A9,VIM,LRG1,LYZ2
5.65626e-88	0.49348	0.924	0.746	1.12022e-83	Serf2	3		GO:BP	positive regulation of locomotion	GO:0040017	FALSE	0.0266355	1.57454	624	49	8	26944	ANXA1,MMP9,PDCD6,FLNA,S100A11,GLIPR2,TMSB4X,GPI1
2.51002e-79	0.488206	0.54	0.208	4.97109e-75	Smpdl3a	3		GO:BP	response to lipopolysaccharide	GO:0032496	FALSE	0.028362	1.54726	451	49	7	26944	MMP8,WFDC21,S100A8,TSPO,MGST1,S100A9,VIM
4.11931e-73	0.484477	0.762	0.434	8.1583e-69	Glipr2	3		GO:BP	response to molecule of bacterial origin	GO:0002237	FALSE	0.0354724	1.45011	467	49	7	26944	MMP8,WFDC21,S100A8,TSPO,MGST1,S100A9,VIM
3.40204e-130	0.480133	1	0.997	6.73774e-126	Tmsb4x	3		GO:BP	glucose 6-phosphate metabolic process	GO:0051156	TRUE	0.0382191	1.41772	30	49	3	26944	TKT,GPI1,G6PDX
1.20763e-68	0.469369	0.538	0.227	2.39171e-64	Asnsd1	3		GO:BP	regulation of multicellular organismal process	GO:0051239	TRUE	0.0403781	1.39385	3165	49	17	26944	NGP,MMP8,ANXA1,PGLYRP1,PROK2,ARHGDIB,MMP9,TSPO,PDCD6,S100A9,FLNA,VIM,LRG1,GLIPR2,GPI1,MAPK13,G6PDX
1.09813e-69	0.46648	0.515	0.207	2.17484e-65	Pnkp	3		GO:BP	cellular response to chemical stress	GO:0062197	FALSE	0.0490661	1.30922	329	49	6	26944	ANXA1,MMP9,TSPO,MGST1,MAPK13,G6PDX
7.68368e-87	0.465281	0.941	0.721	1.52175e-82	Itm2b	3		GO:CC	extracellular space	GO:0005615	TRUE	2.51111e-06	5.60013	1836	49	17	26995	NGP,MMP8,RETNLG,ANXA1,PGLYRP1,WFDC21,S100A8,MMP9,S100A9,S100A11,LRG1,QSOX1,SMPDL3A,GLIPR2,ITM2B,GPI1,LYZ2
7.69397e-71	0.463682	0.778	0.462	1.52379e-66	Gpi1	3		GO:CC	extracellular region	GO:0005576	FALSE	5.37121e-05	4.26993	2554	49	18	26995	NGP,MMP8,RETNLG,ANXA1,PGLYRP1,PROK2,WFDC21,S100A8,MMP9,S100A9,S100A11,LRG1,QSOX1,SMPDL3A,GLIPR2,ITM2B,GPI1,LYZ2
1.10637e-85	0.4538	0.953	0.838	2.19116e-81	Myl6	3		GO:CC	cytoplasm	GO:0005737	FALSE	0.0365657	1.43693	11561	49	34	26995	NGP,CD177,ANXA1,PGLYRP1,ARHGDIB,S100A8,TKT,ALOX5AP,PRR13,TSPO,MGST1,PDCD6,S100A9,ALDH2,S100A6,ATXN10,FLNA,LBR,HACD4,S100A11,VIM,QSOX1,SH3BGRL3,FIS1,CCND3,GYG,SERF2,GLIPR2,TMSB4X,ITM2B,GPI1,MAPK13,G6PDX,LYZ2
1.93633e-64	0.450338	0.419	0.149	3.83491e-60	Mapk13	3		GO:CC	microbody	GO:0042579	TRUE	0.0388332	1.4108	151	49	4	26995	TKT,MGST1,VIM,FIS1
1.76168e-78	0.449863	0.384	0.103	3.48901e-74	G6pdx	3		GO:CC	peroxisome	GO:0005777	FALSE	0.0388332	1.4108	151	49	4	26995	TKT,MGST1,VIM,FIS1
5.78459e-70	0.447542	0.951	0.784	1.14564e-65	Lyz2	3		GO:CC	cellular anatomical entity	GO:0110165	FALSE	0.0435847	1.36067	22653	49	49	26995	IFITM6,NGP,MMP8,RETNLG,CD177,ANXA1,LY6G,PGLYRP1,PROK2,WFDC21,R3HDM4,ARHGDIB,S100A8,TKT,ALOX5AP,LY6C2,MMP9,PRR13,TSPO,CNN2,MGST1,PDCD6,S100A9,ALDH2,S100A6,ATXN10,FLNA,LBR,HACD4,S100A11,VIM,LRG1,QSOX1,SH3BGRL3,FIS1,TAGLN2,CCND3,GYG,SERF2,SMPDL3A,GLIPR2,TMSB4X,PNKP,ITM2B,GPI1,MYL6,MAPK13,G6PDX,LYZ2
1.07102e-67	0.446932	0.797	0.494	2.12115e-63	Pygl	3		KEGG	IL-17 signaling pathway	KEGG:04657	FALSE	0.00518328	2.2854	93	24	4	9330	S100A8,MMP9,S100A9,MAPK13
2.05179e-45	0.439989	0.318	0.114	4.06357e-41	Acvrl1	3		KEGG	Pentose phosphate pathway	KEGG:00030	FALSE	0.00521734	2.28255	34	24	3	9330	TKT,GPI1,G6PDX
3.5791e-73	0.435456	0.783	0.45	7.0884e-69	Dgat1	3
7.07082e-65	0.429457	0.632	0.314	1.40038e-60	Cfp	3
5.06705e-57	0.427817	0.339	0.107	1.00353e-52	Pmvk	3
8.76376e-55	0.426538	0.677	0.388	1.73566e-50	Rab5if	3
1.15191e-105	0.424325	1	0.988	2.28135e-101	Actb	3
1.07575e-31	0.415453	0.954	0.894	2.13053e-27	Ifitm1	3
6.26665e-54	0.415165	0.851	0.606	1.24111e-49	Sub1	3
2.12654e-82	0.411262	0.962	0.791	4.21161e-78	Coro1a	3
1.79334e-66	0.405177	0.833	0.534	3.5517e-62	Adam8	3
3.82119e-80	0.402109	0.329	0.071	7.56787e-76	Flot2	3
1.60792e-55	0.400748	0.532	0.249	3.18449e-51	4932438A13Rik	3
5.65986e-72	0.399427	0.948	0.793	1.12093e-67	Anxa2	3
3.30367e-53	0.397763	0.332	0.106	6.54293e-49	Rflnb	3
3.33336e-78	0.396592	0.948	0.715	6.60172e-74	Taldo1	3
5.02763e-67	0.39562	0.847	0.543	9.95722e-63	Zyx	3
1.34709e-57	0.394904	0.257	0.058	2.66792e-53	Serpinb1a	3
1.19253e-67	0.394488	0.762	0.438	2.3618e-63	Tgfbi	3
1.24701e-57	0.385701	0.468	0.193	2.4697e-53	Sqor	3
9.97194e-55	0.385101	0.575	0.287	1.97494e-50	Actn1	3
1.03454e-52	0.384794	0.302	0.092	2.04892e-48	Ggt1	3
1.43799e-57	0.381776	0.52	0.235	2.84794e-53	Gng2	3
3.55566e-59	0.378245	0.918	0.765	7.04199e-55	Arpc5	3
1.08694e-58	0.377894	0.382	0.131	2.15269e-54	Lamtor4	3
4.83583e-49	0.372658	0.472	0.214	9.57736e-45	Hmgn2	3
4.49441e-38	0.369071	0.254	0.082	8.90118e-34	Krt83	3
4.67935e-46	0.368405	0.406	0.171	9.26745e-42	Mmp25	3
6.54564e-59	0.368131	0.805	0.512	1.29636e-54	Gpx1	3
1.56671e-49	0.365227	0.749	0.476	3.10287e-45	Timp2	3
1.91513e-56	0.36478	0.915	0.691	3.79291e-52	Mrpl33	3
8.40595e-59	0.359981	0.947	0.822	1.6648e-54	Arpc1b	3
4.58179e-59	0.35822	0.584	0.289	9.07424e-55	Dhrs7	3
1.446e-69	0.356421	0.736	0.407	2.86381e-65	Emb	3
5.21592e-69	0.356349	0.961	0.803	1.03301e-64	Hp	3
4.95351e-48	0.355558	0.455	0.204	9.81042e-44	Pi16	3
5.04838e-50	0.351276	0.425	0.177	9.99831e-46	Nfe2	3
5.57821e-60	0.349277	0.938	0.718	1.10476e-55	Mcemp1	3
3.92279e-42	0.343988	0.329	0.124	7.7691e-38	9830107B12Rik	3
5.352e-65	0.343571	0.82	0.512	1.05996e-60	D8Ertd738e	3
5.17276e-51	0.340619	0.841	0.584	1.02446e-46	Cotl1	3
1.37701e-42	0.335483	0.408	0.18	2.72716e-38	Dhrs9	3
7.83094e-50	0.334645	0.373	0.142	1.55092e-45	Ckap4	3
1.71632e-50	0.333278	0.453	0.2	3.39918e-46	Limd2	3
3.11012e-61	0.331556	0.819	0.521	6.1596e-57	Cxcr2	3
3.05824e-43	0.331322	0.45	0.211	6.05684e-39	S100a13	3
1.84546e-52	0.330802	0.951	0.831	3.65493e-48	Sem1	3
7.63131e-69	0.327692	0.998	0.964	1.51138e-64	Actg1	3
1.13491e-33	0.327476	0.666	0.438	2.24768e-29	Eif4g2	3
4.3392e-40	0.327227	0.754	0.51	8.59379e-36	Mbd2	3
1.14529e-44	0.326818	0.552	0.293	2.26825e-40	Atp5f1	3
1.02784e-42	0.326203	0.499	0.254	2.03565e-38	Cdk11b	3
1.05324e-47	0.326162	0.727	0.455	2.08595e-43	Dstn	3
6.69975e-45	0.325763	0.904	0.705	1.32689e-40	Hmgb2	3
2.71678e-18	0.325737	0.32	0.178	5.38059e-14	Trf	3
2.69407e-38	0.323503	0.713	0.472	5.3356e-34	Plp2	3
2.93475e-44	0.322975	0.216	0.053	5.81227e-40	Cdadc1	3
1.39094e-47	0.321621	0.832	0.582	2.75475e-43	Ncf2	3
3.13984e-35	0.321399	0.473	0.25	6.21845e-31	Rasa2	3
8.71728e-58	0.320774	0.245	0.052	1.72646e-53	Adpgk	3
3.79898e-38	0.319678	0.546	0.306	7.52388e-34	Anxa11	3
1.1012e-38	0.319268	0.667	0.421	2.18093e-34	Capza1	3
4.08001e-55	0.318106	0.726	0.434	8.08045e-51	Kctd12	3
1.30386e-63	0.31634	0.865	0.573	2.58229e-59	Gda	3
1.09364e-34	0.313919	0.714	0.485	2.16595e-30	Sri	3
4.51682e-37	0.31233	0.641	0.399	8.94555e-33	H2afz	3
6.49127e-55	0.312035	0.973	0.858	1.2856e-50	Pfn1	3
7.02721e-40	0.30911	0.55	0.306	1.39174e-35	Ppp1ca	3
3.84506e-35	0.3083	0.453	0.234	7.61514e-31	Cyb5r4	3
2.53358e-36	0.307228	0.345	0.147	5.01776e-32	Mettl9	3
8.96742e-36	0.307038	0.583	0.347	1.776e-31	Cdkn1b	3
1.33715e-63	0.306377	0.787	0.478	2.64823e-59	Sorl1	3
2.67874e-52	0.302676	0.39	0.151	5.30524e-48	Magoh	3
8.87456e-49	0.298461	0.559	0.291	1.75761e-44	Cox6c	3
2.76461e-52	0.296687	0.296	0.089	5.47531e-48	Add3	3
2.39152e-71	0.295674	0.848	0.533	4.73641e-67	Sell	3
1.5148e-35	0.294725	0.918	0.812	3.00005e-31	Slc16a3	3
2.07344e-46	0.294137	0.637	0.368	4.10644e-42	Atp11b	3
8.16413e-33	0.293243	0.368	0.173	1.61691e-28	Hmgcr	3
2.2473e-39	0.292939	0.325	0.128	4.45078e-35	Tuba1a	3
4.54282e-40	0.292569	0.947	0.824	8.99706e-36	Calm1	3
4.15862e-35	0.291928	0.469	0.249	8.23614e-31	Capns1	3
8.1235e-38	0.291572	0.249	0.08	1.60886e-33	Ceacam10	3
7.93317e-41	0.288945	0.53	0.287	1.57116e-36	Cdc42se1	3
2.26198e-41	0.288547	0.368	0.154	4.47986e-37	Txndc17	3
5.08612e-38	0.288537	0.795	0.564	1.00731e-33	Myh9	3
5.56504e-42	0.288092	0.93	0.774	1.10216e-37	Gmfg	3
8.58128e-37	0.287455	0.423	0.207	1.69952e-32	Mapk3	3
4.61695e-47	0.286889	0.633	0.366	9.14387e-43	Slc2a3	3
1.12207e-40	0.28588	0.468	0.237	2.22225e-36	Ltb4r1	3
6.78053e-44	0.285528	0.822	0.576	1.34288e-39	Gpsm3	3
2.9672e-35	0.284705	0.404	0.198	5.87654e-31	Crispld2	3
1.52355e-34	0.282786	0.59	0.359	3.01739e-30	Tmcc1	3
2.04606e-45	0.281352	0.209	0.051	4.05223e-41	Itgb2l	3
1.38596e-45	0.281273	0.959	0.831	2.74489e-41	Gnai2	3
1.56346e-60	0.281025	0.994	0.913	3.09644e-56	Cd52	3
3.72284e-27	0.279611	0.241	0.095	7.37309e-23	Hist1h1e	3
1.74336e-37	0.278256	0.25	0.082	3.45273e-33	F5	3
6.8451e-36	0.277958	0.474	0.253	1.35567e-31	Svil	3
1.63718e-35	0.274237	0.451	0.235	3.24244e-31	Fosl1	3
5.45871e-34	0.274133	0.346	0.155	1.0811e-29	Ndufb11	3
1.38984e-40	0.27285	0.979	0.916	2.75258e-36	Gapdh	3
2.2465e-44	0.272203	0.235	0.065	4.4492e-40	Bmx	3
2.56288e-36	0.270296	0.395	0.188	5.07578e-32	Hspa4	3
6.70678e-29	0.269591	0.438	0.241	1.32828e-24	Ywhab	3
2.99776e-31	0.269106	0.557	0.338	5.93707e-27	Ndfip1	3
5.69071e-43	0.269069	0.652	0.395	1.12704e-38	AB124611	3
8.75366e-41	0.268198	0.273	0.092	1.73366e-36	Stim2	3
4.97863e-42	0.265536	0.972	0.878	9.86018e-38	Lcp1	3
1.00512e-35	0.265316	0.8	0.577	1.99063e-31	Pirb	3
8.56886e-28	0.265247	0.572	0.365	1.69706e-23	Kdm7a	3
2.80256e-26	0.264137	0.494	0.298	5.55047e-22	Pomp	3
2.90028e-45	0.26379	0.589	0.33	5.74401e-41	Msra	3
3.92422e-33	0.26252	0.576	0.351	7.77193e-29	Cdkn2d	3
8.41664e-35	0.26057	0.36	0.167	1.66692e-30	Mindy1	3
3.52117e-37	0.260552	0.358	0.157	6.97368e-33	Dbnl	3
3.12659e-32	0.259581	0.332	0.151	6.1922e-28	Abtb1	3
1.36499e-32	0.259488	0.52	0.303	2.70336e-28	Chp1	3
2.64623e-32	0.25771	0.263	0.099	5.24087e-28	Atp11a	3
4.11483e-35	0.257478	0.255	0.091	8.14943e-31	Eid1	3
4.50715e-38	0.2554	0.513	0.283	8.92642e-34	Atp5h	3
2.52318e-28	0.255208	0.481	0.283	4.99716e-24	Emp3	3
5.79008e-32	0.255074	0.232	0.08	1.14672e-27	Gm29264	3
8.48698e-31	0.254753	0.323	0.146	1.68085e-26	Mpc2	3
1.84671e-38	0.25357	0.435	0.219	3.6574e-34	Cmtm6	3
7.75518e-40	0.253482	0.962	0.855	1.53591e-35	Rac2	3
3.69843e-32	0.251991	0.399	0.203	7.32473e-28	Degs1	3
7.65506e-27	0.251509	0.404	0.221	1.51608e-22	Mxi1	3

## Sheet: 4
p_val	avg_logFC	pct.1	pct.2	p_val_adj	gene	cluster		source	term_name	term_id	highlighted	adjusted_p_value	negative_log10_of_adjusted_p_value	term_size	query_size	intersection_size	effective_domain_size	intersections
8.75702e-131	2.15597	0.49	0.167	1.73433e-126	Cxcl10	4		GO:MF	double-stranded RNA binding	GO:0003725	TRUE	3.43634e-06	5.4639	80	47	6	25063	OASL1,OASL2,ZBP1,DDX60,IFIH1,EIF2AK2
0	1.9452	0.946	0.364	0	Rsad2	4		GO:MF	identical protein binding	GO:0042802	TRUE	4.30903e-05	4.36562	2369	47	18	25063	IFIT3,GBP2,IFI204,IFI211,IFIT3B,ZBP1,TRIM30A,IFI207,GBP5,IFIH1,SPPL2A,IFI209,CCL4,EIF2AK2,STAT1,IFI27L2A,SP100,BST2
0	1.88133	0.886	0.193	0	Ifit1	4		GO:MF	protein binding	GO:0005515	FALSE	0.000103099	3.98675	10460	47	37	25063	CXCL10,RSAD2,IFIT1,IFIT3,GBP2,ISG15,PARP14,IFIT2,IFI204,OASL1,HERC6,IFI211,USP18,IRF7,IFIT3B,PLAC8,OASL2,ZBP1,GBP7,DDX60,RTP4,TRIM30A,PSMB8,IFI207,TRAFD1,GBP5,IFIH1,SPPL2A,IFI209,CCL4,TAPBP,EIF2AK2,STAT1,IFI27L2A,PTTG1,SP100,BST2
1.90073e-210	1.60654	0.643	0.099	3.76439e-206	Ifit3	4		GO:MF	binding	GO:0005488	FALSE	0.000272572	3.56452	16378	47	45	25063	CXCL10,RSAD2,IFIT1,IFIT3,GBP2,ISG20,ISG15,PARP14,IFIT2,IFI204,SLFN5,OASL1,IFI47,HERC6,IFI211,XAF1,USP18,IRF7,IFIT3B,PLAC8,OASL2,ZBP1,GBP7,DDX60,RTP4,TRIM30A,CMPK2,SLFN4,PSMB8,IFI207,TRAFD1,GBP5,SLFN8,RNF213,IFIH1,SPPL2A,IFI209,CCL4,TAPBP,EIF2AK2,STAT1,IFI27L2A,PTTG1,SP100,BST2
1.48633e-176	1.39117	0.695	0.202	2.94368e-172	Gbp2	4		GO:BP	response to other organism	GO:0051707	TRUE	1.91519e-35	34.7178	1778	47	39	26944	CXCL10,RSAD2,IFIT1,IFIT3,GBP2,ISG20,ISG15,PARP14,IFIT2,IFI204,OASL1,IFI47,HERC6,IFI211,USP18,IRF7,IFIT3B,PLAC8,OASL2,ZBP1,GBP7,DDX60,RTP4,TRIM30A,IFITM3,CMPK2,SLFN4,IFI207,TRAFD1,GBP5,SLFN8,IFIH1,IFI209,CCL4,EIF2AK2,STAT1,IFI27L2A,SP100,BST2
5.37979e-248	1.35325	0.928	0.478	1.06547e-243	Isg20	4		GO:BP	response to external biotic stimulus	GO:0043207	FALSE	2.09001e-35	34.6799	1782	47	39	26944	CXCL10,RSAD2,IFIT1,IFIT3,GBP2,ISG20,ISG15,PARP14,IFIT2,IFI204,OASL1,IFI47,HERC6,IFI211,USP18,IRF7,IFIT3B,PLAC8,OASL2,ZBP1,GBP7,DDX60,RTP4,TRIM30A,IFITM3,CMPK2,SLFN4,IFI207,TRAFD1,GBP5,SLFN8,IFIH1,IFI209,CCL4,EIF2AK2,STAT1,IFI27L2A,SP100,BST2
2.03158e-270	1.31729	0.996	0.749	4.02355e-266	Isg15	4		GO:BP	defense response to other organism	GO:0098542	FALSE	2.58508e-35	34.5875	1281	47	36	26944	CXCL10,RSAD2,IFIT1,IFIT3,GBP2,ISG20,ISG15,PARP14,IFIT2,IFI204,OASL1,IFI47,HERC6,IFI211,USP18,IRF7,IFIT3B,PLAC8,OASL2,ZBP1,GBP7,DDX60,RTP4,TRIM30A,IFITM3,IFI207,TRAFD1,GBP5,SLFN8,IFIH1,IFI209,CCL4,EIF2AK2,STAT1,SP100,BST2
9.97435e-174	1.23429	0.751	0.259	1.97542e-169	Parp14	4		GO:BP	response to biotic stimulus	GO:0009607	FALSE	4.64488e-35	34.333	1819	47	39	26944	CXCL10,RSAD2,IFIT1,IFIT3,GBP2,ISG20,ISG15,PARP14,IFIT2,IFI204,OASL1,IFI47,HERC6,IFI211,USP18,IRF7,IFIT3B,PLAC8,OASL2,ZBP1,GBP7,DDX60,RTP4,TRIM30A,IFITM3,CMPK2,SLFN4,IFI207,TRAFD1,GBP5,SLFN8,IFIH1,IFI209,CCL4,EIF2AK2,STAT1,IFI27L2A,SP100,BST2
6.94948e-138	1.22133	0.352	0.021	1.37634e-133	Ifit2	4		GO:BP	biological process involved in interspecies interaction between organisms	GO:0044419	FALSE	5.65763e-34	33.2474	1940	47	39	26944	CXCL10,RSAD2,IFIT1,IFIT3,GBP2,ISG20,ISG15,PARP14,IFIT2,IFI204,OASL1,IFI47,HERC6,IFI211,USP18,IRF7,IFIT3B,PLAC8,OASL2,ZBP1,GBP7,DDX60,RTP4,TRIM30A,IFITM3,CMPK2,SLFN4,IFI207,TRAFD1,GBP5,SLFN8,IFIH1,IFI209,CCL4,EIF2AK2,STAT1,IFI27L2A,SP100,BST2
2.89711e-180	1.17507	0.9	0.414	5.73773e-176	Ifi204	4		GO:BP	defense response to symbiont	GO:0140546	FALSE	2.29627e-33	32.639	1150	47	34	26944	CXCL10,RSAD2,IFIT1,IFIT3,GBP2,ISG20,ISG15,PARP14,IFIT2,IFI204,OASL1,HERC6,IFI211,USP18,IRF7,IFIT3B,OASL2,ZBP1,GBP7,DDX60,RTP4,TRIM30A,IFITM3,IFI207,TRAFD1,GBP5,SLFN8,IFIH1,IFI209,CCL4,EIF2AK2,STAT1,SP100,BST2
8.07634e-140	1.17213	0.706	0.223	1.59952e-135	Slfn5	4		GO:BP	defense response to virus	GO:0051607	FALSE	3.15221e-33	32.5014	313	47	25	26944	CXCL10,RSAD2,IFIT1,IFIT3,GBP2,ISG20,ISG15,IFIT2,OASL1,USP18,IRF7,IFIT3B,OASL2,ZBP1,GBP7,DDX60,RTP4,TRIM30A,IFITM3,GBP5,SLFN8,IFIH1,EIF2AK2,STAT1,BST2
1.56307e-154	1.11787	0.676	0.177	3.09567e-150	Oasl1	4		GO:BP	response to virus	GO:0009615	FALSE	1.25966e-32	31.8997	393	47	26	26944	CXCL10,RSAD2,IFIT1,IFIT3,GBP2,ISG20,ISG15,IFIT2,OASL1,USP18,IRF7,IFIT3B,OASL2,ZBP1,GBP7,DDX60,RTP4,TRIM30A,IFITM3,GBP5,SLFN8,IFIH1,EIF2AK2,STAT1,IFI27L2A,BST2
8.10818e-162	1.09976	0.464	0.047	1.60583e-157	Ifi47	4		GO:BP	innate immune response	GO:0045087	FALSE	3.6233e-32	31.4409	977	47	32	26944	CXCL10,RSAD2,IFIT1,IFIT3,GBP2,ISG20,ISG15,PARP14,IFIT2,IFI204,OASL1,HERC6,IFI211,USP18,IRF7,IFIT3B,OASL2,ZBP1,GBP7,DDX60,TRIM30A,IFITM3,IFI207,TRAFD1,GBP5,IFIH1,IFI209,CCL4,EIF2AK2,STAT1,SP100,BST2
2.18134e-155	1.00413	0.553	0.085	4.32014e-151	Herc6	4		GO:BP	defense response	GO:0006952	FALSE	1.32588e-31	30.8775	1812	47	37	26944	CXCL10,RSAD2,IFIT1,IFIT3,GBP2,ISG20,ISG15,PARP14,IFIT2,IFI204,OASL1,IFI47,HERC6,IFI211,USP18,IRF7,IFIT3B,PLAC8,OASL2,ZBP1,GBP7,DDX60,RTP4,TRIM30A,IFITM3,IFI207,TRAFD1,GBP5,SLFN8,IFIH1,IFI209,CCL4,TAPBP,EIF2AK2,STAT1,SP100,BST2
3.33061e-110	0.98164	0.382	0.052	6.59626e-106	Ifi211	4		GO:BP	response to external stimulus	GO:0009605	FALSE	1.9058e-26	25.7199	3042	47	39	26944	CXCL10,RSAD2,IFIT1,IFIT3,GBP2,ISG20,ISG15,PARP14,IFIT2,IFI204,OASL1,IFI47,HERC6,IFI211,USP18,IRF7,IFIT3B,PLAC8,OASL2,ZBP1,GBP7,DDX60,RTP4,TRIM30A,IFITM3,CMPK2,SLFN4,IFI207,TRAFD1,GBP5,SLFN8,IFIH1,IFI209,CCL4,EIF2AK2,STAT1,IFI27L2A,SP100,BST2
1.87912e-143	0.965918	0.669	0.187	3.72161e-139	Xaf1	4		GO:BP	immune response	GO:0006955	FALSE	3.46835e-24	23.4599	1945	47	33	26944	CXCL10,RSAD2,IFIT1,IFIT3,GBP2,ISG20,ISG15,PARP14,IFIT2,IFI204,OASL1,HERC6,IFI211,USP18,IRF7,IFIT3B,OASL2,ZBP1,GBP7,DDX60,TRIM30A,IFITM3,IFI207,TRAFD1,GBP5,IFIH1,SPPL2A,IFI209,CCL4,EIF2AK2,STAT1,SP100,BST2
7.81246e-106	0.962044	0.552	0.142	1.54726e-101	Gm13822	4		GO:BP	immune system process	GO:0002376	FALSE	3.76485e-23	22.4243	2819	47	36	26944	CXCL10,RSAD2,IFIT1,IFIT3,GBP2,ISG20,ISG15,PARP14,IFIT2,IFI204,OASL1,HERC6,IFI211,USP18,IRF7,IFIT3B,OASL2,ZBP1,GBP7,DDX60,TRIM30A,IFITM3,PSMB8,IFI207,TRAFD1,GBP5,SLFN8,IFIH1,SPPL2A,IFI209,CCL4,TAPBP,EIF2AK2,STAT1,SP100,BST2
3.74139e-132	0.960995	0.485	0.091	7.40983e-128	Usp18	4		GO:BP	response to stress	GO:0006950	FALSE	8.90613e-21	20.0503	3936	47	38	26944	CXCL10,RSAD2,IFIT1,IFIT3,GBP2,ISG20,ISG15,PARP14,IFIT2,IFI204,OASL1,IFI47,HERC6,IFI211,USP18,IRF7,IFIT3B,PLAC8,OASL2,ZBP1,GBP7,DDX60,RTP4,TRIM30A,IFITM3,IFI207,TRAFD1,GBP5,SLFN8,IFIH1,IFI209,CCL4,TAPBP,EIF2AK2,STAT1,PTTG1,SP100,BST2
6.82081e-127	0.941962	0.764	0.361	1.35086e-122	Irf7	4		GO:BP	response to interferon-beta	GO:0035456	FALSE	2.45591e-20	19.6098	72	47	13	26944	IFIT1,IFIT3,GBP2,IFI204,IFI47,IFI211,XAF1,GBP7,IFITM3,IFI207,IFI209,STAT1,BST2
6.63184e-111	0.90312	0.356	0.037	1.31344e-106	Ifit3b	4		GO:BP	response to cytokine	GO:0034097	FALSE	3.73432e-20	19.4278	1188	47	26	26944	CXCL10,IFIT1,IFIT3,GBP2,ISG15,PARP14,IFI204,OASL1,IFI47,IFI211,XAF1,USP18,IRF7,OASL2,ZBP1,GBP7,IFITM3,IFI207,GBP5,IFIH1,IFI209,CCL4,EIF2AK2,STAT1,SP100,BST2
5.26599e-86	0.899422	0.82	0.572	1.04293e-81	Plac8	4		GO:BP	regulation of response to biotic stimulus	GO:0002831	FALSE	1.35556e-18	17.8679	556	47	20	26944	RSAD2,GBP2,ISG15,PARP14,IFI204,OASL1,IFI211,USP18,IRF7,ZBP1,GBP7,DDX60,TRIM30A,IFI207,TRAFD1,GBP5,IFIH1,IFI209,EIF2AK2,STAT1
5.69373e-109	0.849368	0.8	0.392	1.12764e-104	Oasl2	4		GO:BP	regulation of innate immune response	GO:0045088	FALSE	1.51609e-18	17.8193	463	47	19	26944	RSAD2,GBP2,ISG15,PARP14,IFI204,OASL1,IFI211,USP18,IRF7,ZBP1,GBP7,DDX60,TRIM30A,IFI207,TRAFD1,GBP5,IFIH1,IFI209,EIF2AK2
8.48229e-109	0.843353	0.743	0.343	1.67992e-104	Zbp1	4		GO:BP	negative regulation of viral process	GO:0048525	TRUE	2.37817e-16	15.6238	99	47	12	26944	RSAD2,ISG20,ISG15,OASL1,OASL2,TRIM30A,IFITM3,IFIH1,EIF2AK2,STAT1,SP100,BST2
1.31628e-88	0.824173	0.448	0.113	2.6069e-84	Gbp7	4		GO:BP	cellular response to cytokine stimulus	GO:0071345	FALSE	1.26278e-15	14.8987	1074	47	22	26944	CXCL10,IFIT1,IFIT3,GBP2,ISG15,PARP14,IFI204,OASL1,IFI47,IFI211,USP18,IRF7,OASL2,ZBP1,GBP7,IFITM3,IFI207,GBP5,IFIH1,IFI209,CCL4,STAT1
1.8778e-77	0.795683	0.482	0.154	3.71898e-73	Ddx60	4		GO:BP	activation of innate immune response	GO:0002218	FALSE	2.13732e-15	14.6701	292	47	15	26944	RSAD2,GBP2,IFI204,OASL1,IFI211,IRF7,ZBP1,GBP7,DDX60,TRIM30A,IFI207,GBP5,IFIH1,IFI209,EIF2AK2
4.37972e-116	0.792534	0.911	0.531	8.67404e-112	Rtp4	4		GO:BP	regulation of defense response	GO:0031347	FALSE	2.24102e-15	14.6496	811	47	20	26944	RSAD2,GBP2,ISG15,PARP14,IFI204,OASL1,IFI211,USP18,IRF7,ZBP1,GBP7,DDX60,TRIM30A,IFI207,TRAFD1,GBP5,IFIH1,IFI209,EIF2AK2,STAT1
9.51427e-101	0.786101	0.83	0.489	1.8843e-96	Trim30a	4		GO:BP	regulation of viral process	GO:0050792	FALSE	4.17576e-15	14.3793	174	47	13	26944	RSAD2,ISG20,ISG15,OASL1,OASL2,GBP7,TRIM30A,IFITM3,IFIH1,EIF2AK2,STAT1,SP100,BST2
4.45146e-138	0.728498	0.996	0.935	8.81612e-134	Ifitm3	4		GO:BP	regulation of immune response	GO:0050776	FALSE	2.17897e-14	13.6617	912	47	20	26944	RSAD2,GBP2,ISG15,PARP14,IFI204,OASL1,IFI211,USP18,IRF7,ZBP1,GBP7,DDX60,TRIM30A,IFI207,TRAFD1,GBP5,IFIH1,SPPL2A,IFI209,EIF2AK2
3.30098e-110	0.717133	0.298	0.021	6.53759e-106	Cmpk2	4		GO:BP	cellular response to interferon-beta	GO:0035458	FALSE	2.2024e-14	13.6571	64	47	10	26944	IFIT1,IFIT3,GBP2,IFI204,IFI47,IFI211,GBP7,IFI207,IFI209,STAT1
2.7751e-111	0.712878	0.975	0.78	5.49609e-107	Slfn4	4		GO:BP	regulation of response to external stimulus	GO:0032101	FALSE	6.82446e-14	13.1659	1126	47	21	26944	CXCL10,RSAD2,GBP2,ISG15,PARP14,IFI204,OASL1,IFI211,USP18,IRF7,ZBP1,GBP7,DDX60,TRIM30A,IFI207,TRAFD1,GBP5,IFIH1,IFI209,EIF2AK2,STAT1
7.39842e-69	0.709467	0.581	0.262	1.46526e-64	Psmb8	4		GO:BP	positive regulation of innate immune response	GO:0045089	FALSE	1.38405e-13	12.8588	386	47	15	26944	RSAD2,GBP2,IFI204,OASL1,IFI211,IRF7,ZBP1,GBP7,DDX60,TRIM30A,IFI207,GBP5,IFIH1,IFI209,EIF2AK2
4.72652e-42	0.703858	0.399	0.155	9.36086e-38	Ifi207	4		GO:BP	regulation of immune system process	GO:0002682	FALSE	2.55999e-13	12.5918	1575	47	23	26944	CXCL10,RSAD2,GBP2,ISG15,PARP14,IFI204,OASL1,IFI211,USP18,IRF7,ZBP1,GBP7,DDX60,TRIM30A,IFI207,TRAFD1,GBP5,IFIH1,SPPL2A,IFI209,EIF2AK2,STAT1,BST2
1.58146e-74	0.671403	0.536	0.212	3.13208e-70	Trafd1	4		GO:BP	positive regulation of response to biotic stimulus	GO:0002833	FALSE	3.90681e-13	12.4082	414	47	15	26944	RSAD2,GBP2,IFI204,OASL1,IFI211,IRF7,ZBP1,GBP7,DDX60,TRIM30A,IFI207,GBP5,IFIH1,IFI209,EIF2AK2
2.94571e-69	0.670648	0.238	0.024	5.83397e-65	Gbp5	4		GO:BP	negative regulation of viral genome replication	GO:0045071	FALSE	4.62051e-13	12.3353	53	47	9	26944	RSAD2,ISG20,ISG15,OASL1,OASL2,IFITM3,IFIH1,EIF2AK2,BST2
1.26005e-69	0.651201	0.426	0.112	2.49552e-65	Slfn8	4		GO:BP	regulation of viral genome replication	GO:0045069	FALSE	5.65197e-13	12.2478	87	47	10	26944	RSAD2,ISG20,ISG15,OASL1,OASL2,GBP7,IFITM3,IFIH1,EIF2AK2,BST2
2.05208e-66	0.643028	0.441	0.136	4.06414e-62	Epsti1	4		GO:BP	regulation of viral life cycle	GO:1903900	FALSE	1.83378e-12	11.7367	145	47	11	26944	RSAD2,ISG20,ISG15,OASL1,OASL2,GBP7,TRIM30A,IFITM3,IFIH1,EIF2AK2,BST2
8.90377e-68	0.639061	0.462	0.139	1.76339e-63	Rnf213	4		GO:BP	positive regulation of defense response	GO:0031349	FALSE	8.64744e-12	11.0631	511	47	15	26944	RSAD2,GBP2,IFI204,OASL1,IFI211,IRF7,ZBP1,GBP7,DDX60,TRIM30A,IFI207,GBP5,IFIH1,IFI209,EIF2AK2
2.87594e-69	0.635428	0.359	0.079	5.6958e-65	Ifih1	4		GO:BP	positive regulation of response to external stimulus	GO:0032103	FALSE	1.50985e-11	10.8211	654	47	16	26944	CXCL10,RSAD2,GBP2,IFI204,OASL1,IFI211,IRF7,ZBP1,GBP7,DDX60,TRIM30A,IFI207,GBP5,IFIH1,IFI209,EIF2AK2
2.35982e-55	0.63479	0.587	0.325	4.67362e-51	Sppl2a	4		GO:BP	viral genome replication	GO:0019079	FALSE	1.57334e-11	10.8032	120	47	10	26944	RSAD2,ISG20,ISG15,OASL1,OASL2,GBP7,IFITM3,IFIH1,EIF2AK2,BST2
8.71947e-54	0.634457	0.252	0.047	1.72689e-49	Ifi209	4		GO:BP	activation of immune response	GO:0002253	FALSE	1.6011e-11	10.7956	533	47	15	26944	RSAD2,GBP2,IFI204,OASL1,IFI211,IRF7,ZBP1,GBP7,DDX60,TRIM30A,IFI207,GBP5,IFIH1,IFI209,EIF2AK2
3.98298e-27	0.634429	0.813	0.723	7.88828e-23	Ccl4	4		GO:BP	cellular response to organic substance	GO:0071310	FALSE	2.11014e-11	10.6757	2420	47	25	26944	CXCL10,IFIT1,IFIT3,GBP2,ISG15,PARP14,IFI204,OASL1,IFI47,IFI211,USP18,IRF7,OASL2,ZBP1,GBP7,TRIM30A,IFITM3,CMPK2,IFI207,GBP5,IFIH1,IFI209,CCL4,EIF2AK2,STAT1
1.44239e-55	0.612821	0.587	0.328	2.85666e-51	Tapbp	4		GO:BP	viral process	GO:0016032	FALSE	3.78219e-11	10.4223	350	47	13	26944	RSAD2,ISG20,ISG15,OASL1,OASL2,GBP7,TRIM30A,IFITM3,IFIH1,EIF2AK2,STAT1,SP100,BST2
6.97924e-67	0.608839	0.422	0.126	1.38224e-62	Eif2ak2	4		GO:BP	regulation of response to stress	GO:0080134	FALSE	5.36727e-11	10.2702	1374	47	20	26944	RSAD2,GBP2,ISG15,PARP14,IFI204,OASL1,IFI211,USP18,IRF7,ZBP1,GBP7,DDX60,TRIM30A,IFI207,TRAFD1,GBP5,IFIH1,IFI209,EIF2AK2,STAT1
4.49224e-53	0.591899	0.45	0.178	8.89687e-49	Stat1	4		GO:BP	response to organic substance	GO:0010033	FALSE	7.98516e-11	10.0977	3435	47	28	26944	CXCL10,IFIT1,IFIT3,GBP2,ISG15,PARP14,IFI204,OASL1,IFI47,IFI211,XAF1,USP18,IRF7,OASL2,ZBP1,GBP7,TRIM30A,IFITM3,CMPK2,IFI207,GBP5,IFIH1,IFI209,CCL4,EIF2AK2,STAT1,SP100,BST2
6.59421e-22	0.588341	0.858	0.802	1.30598e-17	Ifi27l2a	4		GO:BP	response to stimulus	GO:0050896	FALSE	1.07649e-10	9.96799	10506	47	43	26944	CXCL10,RSAD2,IFIT1,IFIT3,GBP2,ISG20,ISG15,PARP14,IFIT2,IFI204,OASL1,IFI47,HERC6,IFI211,XAF1,USP18,IRF7,IFIT3B,PLAC8,OASL2,ZBP1,GBP7,DDX60,RTP4,TRIM30A,IFITM3,CMPK2,SLFN4,IFI207,TRAFD1,GBP5,SLFN8,IFIH1,SPPL2A,IFI209,CCL4,TAPBP,EIF2AK2,STAT1,IFI27L2A,PTTG1,SP100,BST2
1.92529e-57	0.587692	0.461	0.172	3.81305e-53	Ddx58	4		GO:BP	antiviral innate immune response	GO:0140374	FALSE	1.18137e-10	9.92761	57	47	8	26944	CXCL10,IFIT3,IFIT2,USP18,IFIT3B,ZBP1,IFIH1,EIF2AK2
3.94184e-41	0.579815	0.485	0.267	7.80681e-37	Psme2	4		GO:BP	response to type I interferon	GO:0034340	FALSE	8.39325e-10	9.07607	72	47	8	26944	ISG15,USP18,IRF7,ZBP1,IFITM3,IFIH1,STAT1,SP100
2.43504e-48	0.568396	0.506	0.229	4.82259e-44	Pttg1	4		GO:BP	viral life cycle	GO:0019058	FALSE	1.90759e-09	8.71952	272	47	11	26944	RSAD2,ISG20,ISG15,OASL1,OASL2,GBP7,TRIM30A,IFITM3,IFIH1,EIF2AK2,BST2
3.69499e-53	0.564958	0.643	0.354	7.31793e-49	Sp100	4		GO:BP	positive regulation of immune response	GO:0050778	FALSE	1.98446e-09	8.70236	744	47	15	26944	RSAD2,GBP2,IFI204,OASL1,IFI211,IRF7,ZBP1,GBP7,DDX60,TRIM30A,IFI207,GBP5,IFIH1,IFI209,EIF2AK2
6.54723e-43	0.562914	0.384	0.142	1.29668e-38	Bst2	4		GO:BP	interferon-mediated signaling pathway	GO:0140888	FALSE	2.727e-09	8.56432	83	47	8	26944	ISG15,PARP14,USP18,IRF7,ZBP1,IFITM3,IFIH1,STAT1
2.237e-18	0.558974	0.662	0.487	4.43037e-14	Il1a	4		GO:BP	cellular response to chemical stimulus	GO:0070887	FALSE	9.13495e-09	8.03929	3162	47	25	26944	CXCL10,IFIT1,IFIT3,GBP2,ISG15,PARP14,IFI204,OASL1,IFI47,IFI211,USP18,IRF7,OASL2,ZBP1,GBP7,TRIM30A,IFITM3,CMPK2,IFI207,GBP5,IFIH1,IFI209,CCL4,EIF2AK2,STAT1
1.13682e-32	0.553364	0.713	0.479	2.25147e-28	Cd274	4		GO:BP	response to type II interferon	GO:0034341	FALSE	1.37022e-08	7.86321	160	47	9	26944	GBP2,PARP14,GBP7,IFITM3,GBP5,CCL4,STAT1,SP100,BST2
1.30629e-28	0.545588	0.408	0.228	2.58711e-24	Pnp	4		GO:BP	cytoplasmic pattern recognition receptor signaling pathway	GO:0002753	FALSE	1.44951e-08	7.83878	161	47	9	26944	RSAD2,GBP2,OASL1,IRF7,DDX60,TRIM30A,GBP5,IFIH1,EIF2AK2
1.0191e-41	0.541985	0.313	0.095	2.01833e-37	9930111J21Rik2	4		GO:BP	cellular response to type I interferon	GO:0071357	FALSE	3.69887e-08	7.43193	66	47	7	26944	ISG15,USP18,IRF7,ZBP1,IFITM3,IFIH1,STAT1
7.59365e-52	0.539723	0.338	0.092	1.50392e-47	Dtx3l	4		GO:BP	type I interferon-mediated signaling pathway	GO:0060337	FALSE	3.69887e-08	7.43193	66	47	7	26944	ISG15,USP18,IRF7,ZBP1,IFITM3,IFIH1,STAT1
1.9443e-58	0.53751	0.25	0.04	3.85069e-54	Irgm1	4		GO:BP	cytokine-mediated signaling pathway	GO:0019221	FALSE	3.72286e-08	7.42912	473	47	12	26944	CXCL10,ISG15,PARP14,OASL1,USP18,IRF7,OASL2,ZBP1,IFITM3,IFIH1,CCL4,STAT1
1.60598e-43	0.521753	0.576	0.313	3.18065e-39	Tor1aip1	4		GO:BP	positive regulation of immune system process	GO:0002684	FALSE	4.34757e-08	7.36175	1105	47	16	26944	CXCL10,RSAD2,GBP2,IFI204,OASL1,IFI211,IRF7,ZBP1,GBP7,DDX60,TRIM30A,IFI207,GBP5,IFIH1,IFI209,EIF2AK2
2.19367e-61	0.520412	0.25	0.039	4.34457e-57	Igtp	4		GO:BP	response to bacterium	GO:0009617	FALSE	8.2274e-08	7.08474	968	47	15	26944	CXCL10,IFIT1,IFIT3,GBP2,ISG15,IFI204,HERC6,USP18,PLAC8,GBP7,TRIM30A,CMPK2,SLFN4,GBP5,EIF2AK2
1.92402e-49	0.520134	0.375	0.121	3.81053e-45	Ifi35	4		GO:BP	regulation of pattern recognition receptor signaling pathway	GO:0062207	FALSE	3.51565e-07	6.45399	151	47	8	26944	RSAD2,GBP2,OASL1,IRF7,DDX60,TRIM30A,GBP5,EIF2AK2
1.71418e-51	0.519778	0.345	0.095	3.39494e-47	Nmi	4		GO:BP	pattern recognition receptor signaling pathway	GO:0002221	FALSE	6.1666e-07	6.20995	245	47	9	26944	RSAD2,GBP2,OASL1,IRF7,DDX60,TRIM30A,GBP5,IFIH1,EIF2AK2
1.80476e-51	0.514039	0.287	0.064	3.57433e-47	Stat2	4		GO:BP	regulation of cytoplasmic pattern recognition receptor signaling pathway	GO:0039531	FALSE	8.36946e-07	6.0773	102	47	7	26944	RSAD2,GBP2,OASL1,DDX60,TRIM30A,GBP5,EIF2AK2
2.83828e-18	0.507837	0.385	0.243	5.6212e-14	Cybb	4		GO:BP	innate immune response-activating signaling pathway	GO:0002758	FALSE	9.08691e-07	6.04158	256	47	9	26944	RSAD2,GBP2,OASL1,IRF7,DDX60,TRIM30A,GBP5,IFIH1,EIF2AK2
4.1794e-34	0.507327	0.919	0.793	8.2773e-30	Ccrl2	4		GO:BP	response to chemical	GO:0042221	FALSE	1.79998e-06	5.74473	5561	47	29	26944	CXCL10,IFIT1,IFIT3,GBP2,ISG15,PARP14,IFI204,OASL1,IFI47,IFI211,XAF1,USP18,IRF7,OASL2,ZBP1,GBP7,RTP4,TRIM30A,IFITM3,CMPK2,IFI207,GBP5,IFIH1,IFI209,CCL4,EIF2AK2,STAT1,SP100,BST2
6.78527e-40	0.5018	0.699	0.473	1.34382e-35	Samd9l	4		GO:BP	response to interferon-alpha	GO:0035455	FALSE	3.55003e-06	5.44977	31	47	5	26944	IFIT1,IFI204,IFITM3,EIF2AK2,BST2
1.08319e-13	0.498478	0.799	0.701	2.14526e-09	Ccl3	4		GO:BP	regulation of response to stimulus	GO:0048583	FALSE	9.34709e-06	5.02932	3987	47	24	26944	CXCL10,RSAD2,GBP2,ISG15,PARP14,IFI204,OASL1,IFI211,USP18,IRF7,ZBP1,GBP7,DDX60,TRIM30A,IFI207,TRAFD1,GBP5,IFIH1,SPPL2A,IFI209,CCL4,EIF2AK2,STAT1,SP100
8.60051e-22	0.497858	0.701	0.548	1.70333e-17	Ly6e	4		GO:BP	intracellular receptor signaling pathway	GO:0030522	FALSE	1.87074e-05	4.72799	362	47	9	26944	RSAD2,GBP2,OASL1,IRF7,DDX60,TRIM30A,GBP5,IFIH1,EIF2AK2
2.4192e-46	0.493843	0.613	0.311	4.79122e-42	Trim30d	4		GO:BP	regulation of cytokine production	GO:0001817	TRUE	2.01219e-05	4.69633	824	47	12	26944	RSAD2,ISG15,XAF1,IRF7,GBP7,TRIM30A,GBP5,IFIH1,CCL4,EIF2AK2,STAT1,BST2
1.48246e-43	0.487378	0.869	0.679	2.93601e-39	Slfn1	4		GO:BP	cytokine production	GO:0001816	FALSE	2.18039e-05	4.66146	830	47	12	26944	RSAD2,ISG15,XAF1,IRF7,GBP7,TRIM30A,GBP5,IFIH1,CCL4,EIF2AK2,STAT1,BST2
4.72478e-47	0.48679	0.138	0.009	9.35742e-43	Trim30c	4		GO:BP	positive regulation of response to stimulus	GO:0048584	FALSE	5.46726e-05	4.26223	2359	47	18	26944	CXCL10,RSAD2,GBP2,PARP14,IFI204,OASL1,IFI211,IRF7,ZBP1,GBP7,DDX60,TRIM30A,IFI207,GBP5,IFIH1,IFI209,CCL4,EIF2AK2
2.25913e-08	0.481715	0.473	0.393	0.000447421	Ly6c2	4		GO:BP	immune response-activating signaling pathway	GO:0002757	FALSE	0.000114145	3.94254	447	47	9	26944	RSAD2,GBP2,OASL1,IRF7,DDX60,TRIM30A,GBP5,IFIH1,EIF2AK2
1.33992e-32	0.47623	0.562	0.336	2.65371e-28	Trim12a	4		GO:BP	immune response-regulating signaling pathway	GO:0002764	FALSE	0.0001511	3.82074	462	47	9	26944	RSAD2,GBP2,OASL1,IRF7,DDX60,TRIM30A,GBP5,IFIH1,EIF2AK2
7.28256e-46	0.475564	0.394	0.136	1.44231e-41	Tap1	4		GO:BP	type I interferon production	GO:0032606	FALSE	0.000155832	3.80734	128	47	6	26944	ISG15,XAF1,IRF7,GBP7,IFIH1,STAT1
1.67501e-29	0.466798	0.522	0.316	3.31736e-25	Oas3	4		GO:BP	regulation of type I interferon production	GO:0032479	FALSE	0.000155832	3.80734	128	47	6	26944	ISG15,XAF1,IRF7,GBP7,IFIH1,STAT1
2.33339e-63	0.462323	0.993	0.95	4.62128e-59	B2m	4		GO:BP	cytolysis in another organism	GO:0051715	TRUE	0.000165201	3.78199	6	47	3	26944	GBP2,GBP7,GBP5
4.68832e-26	0.458807	0.515	0.302	9.28523e-22	Ctss	4		GO:BP	interleukin-27-mediated signaling pathway	GO:0070106	FALSE	0.000165201	3.78199	6	47	3	26944	OASL1,OASL2,STAT1
1.58338e-42	0.453309	0.284	0.077	3.13589e-38	Parp9	4		GO:BP	cellular response to type II interferon	GO:0071346	FALSE	0.000178864	3.74748	131	47	6	26944	GBP2,PARP14,GBP7,GBP5,CCL4,STAT1
4.21844e-21	0.448404	0.476	0.307	8.35462e-17	Taf7	4		GO:BP	positive regulation of pattern recognition receptor signaling pathway	GO:0062208	FALSE	0.000223496	3.65073	69	47	5	26944	RSAD2,GBP2,OASL1,DDX60,GBP5
9.60005e-36	0.448239	0.368	0.157	1.90129e-31	Ogfr	4		GO:BP	cytolysis	GO:0019835	FALSE	0.00046143	3.33589	8	47	3	26944	GBP2,GBP7,GBP5
6.12246e-24	0.444995	0.848	0.708	1.21255e-19	Marcksl1	4		GO:BP	regulation of response to cytokine stimulus	GO:0060759	FALSE	0.000584	3.23359	160	47	6	26944	ISG15,PARP14,USP18,IRF7,ZBP1,IFIH1
4.7773e-25	0.443904	0.191	0.055	9.46145e-21	Ly6i	4		GO:BP	regulation of inflammasome-mediated signaling pathway	GO:0141085	FALSE	0.0013079	2.88342	41	47	4	26944	GBP2,TRIM30A,GBP5,EIF2AK2
3.65965e-49	0.442019	0.27	0.057	7.24794e-45	Tor3a	4		GO:BP	regulation of type I interferon-mediated signaling pathway	GO:0060338	FALSE	0.00228601	2.64092	47	47	4	26944	ISG15,USP18,IRF7,ZBP1
5.34207e-34	0.440398	0.52	0.27	1.058e-29	H2-Q4	4		GO:BP	inflammasome-mediated signaling pathway	GO:0141084	FALSE	0.00228601	2.64092	47	47	4	26944	GBP2,TRIM30A,GBP5,EIF2AK2
3.50982e-33	0.438361	0.343	0.141	6.95119e-29	Sp110	4		GO:BP	positive regulation of AIM2 inflammasome complex assembly	GO:0140973	FALSE	0.0049636	2.3042	2	47	2	26944	GBP2,GBP5
4.00855e-37	0.437854	0.256	0.076	7.93893e-33	Nt5c3	4		GO:BP	positive regulation of cytokine production	GO:0001819	FALSE	0.00514696	2.28845	523	47	8	26944	RSAD2,ISG15,IRF7,GBP5,IFIH1,CCL4,EIF2AK2,STAT1
1.188e-13	0.435385	0.231	0.128	2.35284e-09	Nos2	4		GO:BP	positive regulation of response to cytokine stimulus	GO:0060760	FALSE	0.0101615	1.99304	68	47	4	26944	PARP14,IRF7,ZBP1,IFIH1
3.24943e-43	0.42839	0.247	0.055	6.43549e-39	Daxx	4		GO:BP	regulation of cytokine-mediated signaling pathway	GO:0001959	FALSE	0.01025	1.98928	149	47	5	26944	ISG15,PARP14,USP18,IRF7,ZBP1
1.18625e-50	0.427745	0.989	0.95	2.34937e-46	Acod1	4		GO:BP	cellular response to stimulus	GO:0051716	FALSE	0.0169831	1.76998	8752	47	30	26944	CXCL10,RSAD2,IFIT1,IFIT3,GBP2,ISG15,PARP14,IFI204,OASL1,IFI47,IFI211,USP18,IRF7,OASL2,ZBP1,GBP7,DDX60,TRIM30A,IFITM3,CMPK2,IFI207,GBP5,IFIH1,IFI209,CCL4,EIF2AK2,STAT1,IFI27L2A,PTTG1,SP100
5.18374e-40	0.426157	0.242	0.061	1.02664e-35	Zup1	4		GO:BP	positive regulation of interferon-alpha production	GO:0032727	FALSE	0.0209564	1.67868	26	47	3	26944	IRF7,IFIH1,STAT1
1.82742e-40	0.421195	0.231	0.056	3.61921e-36	Ube2l6	4		GO:BP	positive regulation of type I interferon production	GO:0032481	FALSE	0.0214377	1.66882	82	47	4	26944	ISG15,IRF7,IFIH1,STAT1
3.4934e-18	0.421092	0.338	0.196	6.91868e-14	Lipg	4		GO:BP	regulation of AIM2 inflammasome complex assembly	GO:0140971	FALSE	0.0297153	1.52702	4	47	2	26944	GBP2,GBP5
7.0443e-30	0.420195	0.489	0.272	1.39512e-25	Lgals9	4		GO:BP	positive regulation of pyroptosis	GO:0140639	TRUE	0.0297153	1.52702	4	47	2	26944	GBP2,GBP5
2.42931e-23	0.418127	0.485	0.299	4.81124e-19	Irf2	4		GO:BP	interferon-alpha production	GO:0032607	FALSE	0.0360093	1.44358	31	47	3	26944	IRF7,IFIH1,STAT1
3.24557e-23	0.410124	0.326	0.155	6.42784e-19	Peli1	4		GO:BP	regulation of interferon-alpha production	GO:0032647	FALSE	0.0360093	1.44358	31	47	3	26944	IRF7,IFIH1,STAT1
1.25972e-45	0.409708	0.939	0.825	2.49487e-41	H2-K1	4		GO:BP	killing of cells of another organism	GO:0031640	FALSE	0.0451494	1.34535	99	47	4	26944	CXCL10,GBP2,GBP7,GBP5
2.06202e-21	0.40461	0.103	0.022	4.08382e-17	Ifi206	4		GO:BP	disruption of cell in another organism	GO:0141061	FALSE	0.0451494	1.34535	99	47	4	26944	CXCL10,GBP2,GBP7,GBP5
6.08548e-23	0.386598	0.324	0.163	1.20523e-18	Psmb9	4		GO:BP	regulation of signal transduction	GO:0009966	FALSE	0.0463392	1.33405	3005	47	16	26944	RSAD2,GBP2,ISG15,PARP14,OASL1,USP18,IRF7,ZBP1,GBP7,DDX60,TRIM30A,GBP5,CCL4,EIF2AK2,STAT1,SP100
1.14446e-13	0.382016	0.28	0.166	2.26659e-09	Irf1	4		GO:CC	cytoplasm	GO:0005737	TRUE	3.66965e-08	7.43538	11561	48	42	26995	RSAD2,IFIT1,IFIT3,GBP2,ISG20,ISG15,PARP14,IFIT2,IFI204,OASL1,IFI47,HERC6,IFI211,XAF1,USP18,IRF7,IFIT3B,OASL2,ZBP1,GBP7,DDX60,RTP4,TRIM30A,IFITM3,CMPK2,SLFN4,PSMB8,IFI207,TRAFD1,GBP5,SLFN8,RNF213,IFIH1,SPPL2A,IFI209,TAPBP,EIF2AK2,STAT1,IFI27L2A,PTTG1,SP100,BST2
1.60347e-26	0.380752	0.716	0.58	3.17567e-22	Sp140	4		GO:CC	cytosol	GO:0005829	FALSE	3.89369e-06	5.40964	4105	48	24	26995	IFIT1,IFIT3,GBP2,PARP14,IFI204,OASL1,HERC6,IFI211,USP18,IRF7,IFIT3B,OASL2,ZBP1,DDX60,TRIM30A,SLFN4,PSMB8,IFI207,SLFN8,RNF213,IFI209,EIF2AK2,STAT1,PTTG1
4.54504e-24	0.375197	0.306	0.137	9.00146e-20	1600014C10Rik	4		GO:CC	intracellular membrane-bounded organelle	GO:0043231	FALSE	0.00324545	2.48873	14435	48	40	26995	RSAD2,IFIT3,GBP2,ISG20,PARP14,IFIT2,IFI204,SLFN5,OASL1,IFI47,HERC6,IFI211,XAF1,USP18,IRF7,IFIT3B,PLAC8,OASL2,ZBP1,GBP7,TRIM30A,IFITM3,CMPK2,SLFN4,PSMB8,IFI207,TRAFD1,GBP5,SLFN8,RNF213,IFIH1,SPPL2A,IFI209,TAPBP,EIF2AK2,STAT1,IFI27L2A,PTTG1,SP100,BST2
5.2381e-29	0.370896	0.792	0.634	1.03741e-24	Chmp4b	4		GO:CC	intracellular anatomical structure	GO:0005622	FALSE	0.00351714	2.45381	17412	48	44	26995	RSAD2,IFIT1,IFIT3,GBP2,ISG20,ISG15,PARP14,IFIT2,IFI204,SLFN5,OASL1,IFI47,HERC6,IFI211,XAF1,USP18,IRF7,IFIT3B,PLAC8,OASL2,ZBP1,GBP7,DDX60,RTP4,TRIM30A,IFITM3,CMPK2,SLFN4,PSMB8,IFI207,TRAFD1,GBP5,SLFN8,RNF213,IFIH1,SPPL2A,IFI209,TAPBP,EIF2AK2,STAT1,IFI27L2A,PTTG1,SP100,BST2
1.46165e-22	0.368421	0.648	0.466	2.8948e-18	Casp4	4		GO:CC	symbiont cell surface	GO:0106139	TRUE	0.00720881	2.14214	5	48	2	26995	GBP2,GBP5
6.63384e-20	0.364077	0.41	0.242	1.31383e-15	Gm20559	4		GO:CC	host intracellular region	GO:0043656	FALSE	0.00720881	2.14214	5	48	2	26995	GBP2,GBP7
3.66302e-22	0.358041	0.781	0.632	7.25462e-18	Samhd1	4		GO:CC	host cell cytoplasm part	GO:0033655	FALSE	0.00720881	2.14214	5	48	2	26995	GBP2,GBP7
2.62163e-20	0.358038	0.356	0.183	5.19215e-16	Ascc3	4		GO:CC	host intracellular part	GO:0033646	TRUE	0.00720881	2.14214	5	48	2	26995	GBP2,GBP7
1.2763e-20	0.353298	0.243	0.1	2.52772e-16	Tbrg1	4		GO:CC	host cell part	GO:0033643	FALSE	0.00720881	2.14214	5	48	2	26995	GBP2,GBP7
9.68693e-19	0.350076	0.48	0.313	1.9185e-14	Psme1	4		GO:CC	host cell cytoplasm	GO:0030430	FALSE	0.00720881	2.14214	5	48	2	26995	GBP2,GBP7
9.78117e-28	0.349957	0.294	0.114	1.93716e-23	Parp10	4		GO:CC	symbiont-containing vacuole membrane	GO:0020005	FALSE	0.00720881	2.14214	5	48	2	26995	GBP2,GBP7
1.12527e-16	0.348832	0.545	0.4	2.22859e-12	Nfkbib	4		GO:CC	symbiont-containing vacuole	GO:0020003	FALSE	0.00720881	2.14214	5	48	2	26995	GBP2,GBP7
5.92546e-22	0.34743	0.37	0.19	1.17354e-17	Usp25	4		GO:CC	membrane-bounded organelle	GO:0043227	FALSE	0.00934144	2.02959	14934	48	40	26995	RSAD2,IFIT3,GBP2,ISG20,PARP14,IFIT2,IFI204,SLFN5,OASL1,IFI47,HERC6,IFI211,XAF1,USP18,IRF7,IFIT3B,PLAC8,OASL2,ZBP1,GBP7,TRIM30A,IFITM3,CMPK2,SLFN4,PSMB8,IFI207,TRAFD1,GBP5,SLFN8,RNF213,IFIH1,SPPL2A,IFI209,TAPBP,EIF2AK2,STAT1,IFI27L2A,PTTG1,SP100,BST2
4.97035e-19	0.346251	0.48	0.292	9.84378e-15	Trim25	4		GO:CC	other organism part	GO:0044217	FALSE	0.0108009	1.96654	6	48	2	26995	GBP2,GBP5
2.5584e-37	0.345772	0.177	0.031	5.06691e-33	Parp12	4		GO:CC	intracellular organelle	GO:0043229	FALSE	0.0144105	1.84132	15836	48	41	26995	RSAD2,IFIT3,GBP2,ISG20,PARP14,IFIT2,IFI204,SLFN5,OASL1,IFI47,HERC6,IFI211,XAF1,USP18,IRF7,IFIT3B,PLAC8,OASL2,ZBP1,GBP7,DDX60,TRIM30A,IFITM3,CMPK2,SLFN4,PSMB8,IFI207,TRAFD1,GBP5,SLFN8,RNF213,IFIH1,SPPL2A,IFI209,TAPBP,EIF2AK2,STAT1,IFI27L2A,PTTG1,SP100,BST2
1.0341e-23	0.343999	0.27	0.108	2.04804e-19	Trim56	4		GO:CC	organelle	GO:0043226	FALSE	0.027789	1.55613	16169	48	41	26995	RSAD2,IFIT3,GBP2,ISG20,PARP14,IFIT2,IFI204,SLFN5,OASL1,IFI47,HERC6,IFI211,XAF1,USP18,IRF7,IFIT3B,PLAC8,OASL2,ZBP1,GBP7,DDX60,TRIM30A,IFITM3,CMPK2,SLFN4,PSMB8,IFI207,TRAFD1,GBP5,SLFN8,RNF213,IFIH1,SPPL2A,IFI209,TAPBP,EIF2AK2,STAT1,IFI27L2A,PTTG1,SP100,BST2
7.83718e-18	0.343511	0.257	0.114	1.55215e-13	Clic4	4		GO:CC	host cellular component	GO:0018995	FALSE	0.0472014	1.32605	12	48	2	26995	GBP2,GBP7
3.92739e-19	0.342956	0.569	0.436	7.7782e-15	Shisa5	4		KEGG	Cytosolic DNA-sensing pathway	KEGG:04623	FALSE	8.90104e-05	4.05056	82	23	5	9330	CXCL10,IFI204,IRF7,ZBP1,CCL4
1.23791e-34	0.342188	0.986	0.912	2.45169e-30	Slfn2	4		KEGG	Hepatitis C	KEGG:05160	FALSE	0.000141968	3.84781	165	23	6	9330	CXCL10,RSAD2,IFIT1,IRF7,EIF2AK2,STAT1
9.64513e-19	0.338121	0.385	0.226	1.91022e-14	Rnf114	4		KEGG	Influenza A	KEGG:05164	FALSE	0.000180841	3.7427	172	23	6	9330	CXCL10,RSAD2,IRF7,IFIH1,EIF2AK2,STAT1
1.05089e-18	0.338117	0.305	0.154	2.08129e-14	Gm21188	4		KEGG	NOD-like receptor signaling pathway	KEGG:04621	FALSE	0.000542586	3.26553	208	23	6	9330	GBP2,IFI204,IRF7,GBP7,GBP5,STAT1
2.15971e-21	0.337307	0.331	0.164	4.27731e-17	Helz2	4		KEGG	Epstein-Barr virus infection	KEGG:05169	FALSE	0.000808619	3.09226	223	23	6	9330	CXCL10,ISG15,IRF7,TAPBP,EIF2AK2,STAT1
9.19597e-20	0.334354	0.201	0.088	1.82126e-15	Ehd4	4		KEGG	RIG-I-like receptor signaling pathway	KEGG:04622	FALSE	0.00157902	2.80161	71	23	4	9330	CXCL10,ISG15,IRF7,IFIH1
3.15767e-16	0.331581	0.515	0.362	6.25377e-12	H2-T23	4		KEGG	Herpes simplex virus 1 infection	KEGG:05168	FALSE	0.00435597	2.36092	445	23	7	9330	IRF7,IFIH1,TAPBP,EIF2AK2,STAT1,SP100,BST2
2.35167e-18	0.328227	0.371	0.21	4.65749e-14	Irf9	4		KEGG	Toll-like receptor signaling pathway	KEGG:04620	FALSE	0.0068191	2.16627	103	23	4	9330	CXCL10,IRF7,CCL4,STAT1
1.4285e-14	0.326257	0.385	0.24	2.82914e-10	Nampt	4		KEGG	Coronavirus disease - COVID-19	KEGG:05171	FALSE	0.0170229	1.76897	243	23	5	9330	CXCL10,ISG15,IFIH1,EIF2AK2,STAT1
2.4519e-21	0.326099	0.194	0.065	4.85599e-17	Tent5a	4		KEGG	Measles	KEGG:05162	FALSE	0.0247779	1.60594	144	23	4	9330	IRF7,IFIH1,EIF2AK2,STAT1
2.30902e-05	0.325879	0.473	0.381	0.457301	Tnf	4
5.96262e-27	0.325463	0.144	0.028	1.1809e-22	Gbp9	4
1.41282e-21	0.320807	0.2	0.069	2.79809e-17	Casp8	4
2.20815e-13	0.318881	0.438	0.312	4.37324e-09	Gch1	4
3.35495e-14	0.317098	0.361	0.231	6.64448e-10	Trim12c	4
1.49416e-14	0.314144	0.364	0.216	2.95919e-10	Clec2d	4
7.64161e-32	0.313946	0.112	0.012	1.51342e-27	Gbp3	4
3.20923e-25	0.312722	0.956	0.893	6.35588e-21	Samsn1	4
4.69128e-23	0.311675	0.841	0.747	9.29107e-19	Tmbim6	4
6.47488e-29	0.311385	0.158	0.031	1.28235e-24	A930037H05Rik	4
7.18433e-12	0.302749	0.743	0.66	1.42286e-07	Upp1	4
7.54122e-19	0.295878	0.986	0.951	1.49354e-14	Prdx5	4
2.71044e-11	0.294387	0.718	0.589	5.36803e-07	Bcl2a1b	4
2.23341e-12	0.29257	0.676	0.572	4.42328e-08	Tlr2	4
1.37757e-18	0.291714	0.114	0.025	2.72827e-14	Ifit1bl2	4
4.09899e-27	0.291204	0.103	0.012	8.11805e-23	Ifi208	4
9.16835e-16	0.286175	0.701	0.546	1.81579e-11	Trim30b	4
7.74451e-17	0.278613	0.266	0.127	1.5338e-12	Lgals8	4
1.39579e-16	0.271871	0.897	0.803	2.76436e-12	Slc15a3	4
1.02255e-10	0.270923	0.51	0.411	2.02516e-06	Npc2	4
2.23141e-13	0.270736	0.877	0.817	4.4193e-09	Rab7	4
2.58729e-14	0.269852	0.266	0.137	5.12413e-10	H2-T22	4
4.68805e-15	0.267338	0.806	0.692	9.28468e-11	Smox	4
1.47135e-10	0.265802	0.879	0.79	2.91401e-06	Gadd45b	4
1.37541e-22	0.262047	0.131	0.028	2.72399e-18	Mitd1	4
4.40401e-11	0.258168	0.131	0.05	8.72214e-07	Tmem140	4
1.04534e-11	0.257428	0.86	0.763	2.07031e-07	Il1rn	4
6.02726e-09	0.255986	0.772	0.679	0.00011937	Sod2	4
1.20865e-16	0.252891	0.17	0.06	2.39374e-12	Znfx1	4
6.09405e-10	0.252346	0.378	0.285	1.20693e-05	Rap2c	4

## Sheet: 5
p_val	avg_logFC	pct.1	pct.2	p_val_adj	gene	cluster		source	term_name	term_id	highlighted	adjusted_p_value	negative_log10_of_adjusted_p_value	term_size	query_size	intersection_size	effective_domain_size	intersections
5.38802e-76	1.24603	0.705	0.364	1.0671e-71	Tnf	5		GO:MF	cytokine receptor binding	GO:0005126	TRUE	6.44772e-12	11.1906	317	47	13	25063	TNF,IL23A,CCL3,IL1A,CCL4,CXCL3,CXCL2,TGFB1,CCRL2,IL1RN,CSF1,CSF3,CFLAR
5.06219e-135	1.22506	0.92	0.576	1.00257e-130	Bcl2a1b	5		GO:MF	cytokine activity	GO:0005125	FALSE	7.48972e-12	11.1255	241	47	12	25063	TNF,IL23A,CCL3,IL1A,CCL4,CXCL3,CXCL2,TGFB1,IL1RN,SPP1,CSF1,CSF3
2.45659e-37	1.20492	0.3	0.084	4.86528e-33	Il23a	5		GO:MF	signaling receptor regulator activity	GO:0030545	FALSE	2.06467e-08	7.68515	601	47	13	25063	TNF,IL23A,CCL3,IL1A,CCL4,CXCL3,CXCL2,TGFB1,IL1RN,SPP1,CSF1,CLEC12A,CSF3
2.1358e-94	1.17319	0.954	0.691	4.22996e-90	Ccl3	5		GO:MF	receptor ligand activity	GO:0048018	FALSE	1.14515e-07	6.94114	549	47	12	25063	TNF,IL23A,CCL3,IL1A,CCL4,CXCL3,CXCL2,TGFB1,IL1RN,SPP1,CSF1,CSF3
8.57313e-87	1.09323	0.737	0.305	1.69791e-82	Bcl2a1d	5		GO:MF	signaling receptor activator activity	GO:0030546	FALSE	1.32304e-07	6.87843	556	47	12	25063	TNF,IL23A,CCL3,IL1A,CCL4,CXCL3,CXCL2,TGFB1,IL1RN,SPP1,CSF1,CSF3
3.91259e-72	1.08945	0.815	0.48	7.74889e-68	Il1a	5		GO:MF	signaling receptor binding	GO:0005102	FALSE	6.00679e-06	5.22136	1591	47	16	25063	TNF,IL23A,CCL3,IL1A,ICAM1,CCL4,CXCL3,PLAUR,CXCL2,TGFB1,CCRL2,IL1RN,SPP1,CSF1,CSF3,CFLAR
1.83454e-73	1.05803	0.71	0.308	3.63332e-69	Icam1	5		GO:MF	molecular function activator activity	GO:0140677	FALSE	3.81927e-05	4.41802	1124	47	13	25063	TNF,IL23A,CCL3,IL1A,CCL4,CXCL3,CXCL2,TGFB1,IL1RN,SPP1,CSF1,CSF3,CFLAR
2.65089e-69	1.04878	0.666	0.301	5.25009e-65	Bcl2a1a	5		GO:MF	protein binding	GO:0005515	FALSE	0.000103099	3.98675	10460	47	37	25063	TNF,BCL2A1B,IL23A,CCL3,BCL2A1D,IL1A,ICAM1,BCL2A1A,MARCKSL1,CCL4,CXCL3,PLAUR,CXCL2,TGFB1,CCRL2,CHKA,CLEC4E,IL1RN,SPP1,RBPJ,KLF2,CLEC4N,MAPKAPK2,ATP6V1E1,CSF1,UPP1,UBC,EHD1,CSF3,GCH1,XBP1,CFLAR,MARCKS,FAS,NR4A1,DUSP2,SOD2
2.25337e-87	0.943636	0.927	0.706	4.46281e-83	Marcksl1	5		GO:MF	chemokine receptor binding	GO:0042379	FALSE	0.00013524	3.8689	77	47	5	25063	CCL3,CCL4,CXCL3,CXCL2,CCRL2
4.17994e-59	0.922727	0.92	0.716	8.27838e-55	Ccl4	5		GO:MF	identical protein binding	GO:0042802	TRUE	0.000253378	3.59623	2369	47	17	25063	TNF,BCL2A1B,CCL3,BCL2A1D,BCL2A1A,CCL4,TGFB1,CHKA,CSF1,UPP1,EHD1,GCH1,XBP1,MARCKS,FAS,NR4A1,SOD2
2.63354e-36	0.908937	0.856	0.737	5.21572e-32	Cxcl3	5		GO:MF	chemokine activity	GO:0008009	FALSE	0.000621271	3.20672	45	47	4	25063	CCL3,CCL4,CXCL3,CXCL2
1.04223e-49	0.809563	0.549	0.317	2.06413e-45	Mrgpra2a	5		GO:MF	molecular function regulator activity	GO:0098772	FALSE	0.00132661	2.87726	2074	47	15	25063	TNF,IL23A,CCL3,BCL2A1D,IL1A,CCL4,CXCL3,CXCL2,TGFB1,IL1RN,SPP1,CSF1,CLEC12A,CSF3,CFLAR
9.8924e-56	0.790395	0.69	0.522	1.95919e-51	Mrgpra2b	5		GO:MF	BH domain binding	GO:0051400	TRUE	0.00201	2.6968	18	47	3	25063	BCL2A1B,BCL2A1D,BCL2A1A
2.46762e-71	0.779704	0.895	0.764	4.88711e-67	Plaur	5		GO:MF	enzyme binding	GO:0019899	FALSE	0.00549837	2.25977	2330	47	15	25063	TNF,PLAUR,TGFB1,MAPKAPK2,ATP6V1E1,UBC,EHD1,CSF3,GCH1,XBP1,CFLAR,MARCKS,FAS,DUSP2,SOD2
1.04592e-51	0.767418	0.859	0.671	2.07144e-47	Il1f9	5		GO:MF	protease binding	GO:0002020	FALSE	0.0117299	1.93071	191	47	5	25063	TNF,UBC,XBP1,CFLAR,FAS
1.08513e-51	0.754376	1	1	2.14909e-47	Cxcl2	5		GO:MF	mitogen-activated protein kinase binding	GO:0051019	TRUE	0.0119946	1.92102	32	47	3	25063	MAPKAPK2,GCH1,DUSP2
2.69707e-59	0.69318	0.924	0.723	5.34154e-55	Hcar2	5		GO:MF	CCR1 chemokine receptor binding	GO:0031726	TRUE	0.0208873	1.68012	6	47	2	25063	CCL3,CCL4
9.54613e-41	0.646334	0.515	0.227	1.89061e-36	Tgfb1	5		GO:MF	protein-containing complex binding	GO:0044877	TRUE	0.026941	1.56959	2038	47	13	25063	BCL2A1B,BCL2A1D,ICAM1,BCL2A1A,MARCKSL1,TGFB1,SPP1,RBPJ,GCH1,XBP1,CFLAR,MARCKS,FAS
3.15252e-50	0.644802	0.968	0.793	6.24357e-46	Ccrl2	5		GO:MF	CCR5 chemokine receptor binding	GO:0031730	TRUE	0.0292073	1.53451	7	47	2	25063	CCL3,CCL4
1.33411e-23	0.641591	0.329	0.138	2.64221e-19	Chka	5		GO:BP	response to stress	GO:0006950	TRUE	1.04291e-12	11.9818	3936	46	31	26944	TNF,BCL2A1B,IL23A,CCL3,BCL2A1D,IL1A,ICAM1,BCL2A1A,CCL4,CXCL3,PLAUR,CXCL2,TGFB1,CCRL2,CHKA,CLEC4E,IL1RN,SPP1,RBPJ,KLF2,CLEC4N,MAPKAPK2,CSF1,UPP1,GCH1,XBP1,CFLAR,MARCKS,FAS,NR4A1,SOD2
6.2464e-44	0.640803	0.978	0.948	1.2371e-39	Clec4e	5		GO:BP	cell surface receptor signaling pathway	GO:0007166	FALSE	1.82662e-12	11.7384	2766	46	27	26944	TNF,BCL2A1B,IL23A,CCL3,BCL2A1D,IL1A,ICAM1,BCL2A1A,CCL4,CXCL3,PLAUR,CXCL2,HCAR2,TGFB1,CCRL2,CLEC4E,IL1RN,RBPJ,CLEC4N,MAPKAPK2,CSF1,CSF3,XBP1,CFLAR,MARCKS,ARID5B,FAS
1.21727e-10	0.638562	0.41	0.254	2.41081e-06	Gm12840	5		GO:BP	immune system process	GO:0002376	FALSE	2.93701e-12	11.5321	2819	46	27	26944	TNF,IL23A,CCL3,BCL2A1D,IL1A,ICAM1,BCL2A1A,CCL4,CXCL3,CXCL2,HCAR2,TGFB1,CCRL2,CLEC4E,IL1RN,SPP1,RBPJ,KLF2,CLEC4N,MAPKAPK2,CSF1,CSF3,GCH1,XBP1,CFLAR,FAS,MAP3K8
1.51095e-62	0.638258	0.976	0.757	2.99244e-58	Il1rn	5		GO:BP	cell communication	GO:0007154	FALSE	3.89657e-11	10.4093	7582	46	38	26944	TNF,BCL2A1B,IL23A,CCL3,BCL2A1D,IL1A,ICAM1,BCL2A1A,CCL4,CXCL3,MRGPRA2A,MRGPRA2B,PLAUR,CXCL2,HCAR2,TGFB1,CCRL2,CHKA,CLEC4E,IL1RN,SPP1,RBPJ,KLF2,CLEC4N,MAPKAPK2,CSF1,UPP1,CSF3,XBP1,GPR84,CFLAR,MARCKS,ARID5B,FAS,NR4A1,DUSP2,SOD2,MAP3K8
4.75033e-11	0.633744	0.422	0.309	9.40804e-07	Spp1	5		GO:BP	signal transduction	GO:0007165	FALSE	1.8678e-10	9.72867	6895	46	36	26944	TNF,BCL2A1B,IL23A,CCL3,BCL2A1D,IL1A,ICAM1,BCL2A1A,CCL4,CXCL3,MRGPRA2A,MRGPRA2B,PLAUR,CXCL2,HCAR2,TGFB1,CCRL2,CLEC4E,IL1RN,SPP1,RBPJ,KLF2,CLEC4N,MAPKAPK2,CSF1,CSF3,XBP1,GPR84,CFLAR,MARCKS,ARID5B,FAS,NR4A1,DUSP2,SOD2,MAP3K8
5.17145e-44	0.627438	0.746	0.473	1.02421e-39	Rbpj	5		GO:BP	response to cytokine	GO:0034097	FALSE	5.25705e-10	9.27926	1188	46	18	26944	TNF,CCL3,IL1A,ICAM1,CCL4,CXCL3,CXCL2,CCRL2,IL1RN,SPP1,KLF2,MAPKAPK2,CSF1,CSF3,GCH1,XBP1,ARID5B,FAS
1.08253e-31	0.625893	0.866	0.719	2.14395e-27	Klf2	5		GO:BP	cellular response to stimulus	GO:0051716	FALSE	5.52129e-10	9.25796	8752	46	39	26944	TNF,BCL2A1B,IL23A,CCL3,BCL2A1D,IL1A,ICAM1,BCL2A1A,CCL4,CXCL3,MRGPRA2A,MRGPRA2B,PLAUR,CXCL2,HCAR2,TGFB1,CCRL2,CHKA,CLEC4E,IL1RN,SPP1,RBPJ,KLF2,CLEC4N,MAPKAPK2,CSF1,UPP1,CSF3,GCH1,XBP1,GPR84,CFLAR,MARCKS,ARID5B,FAS,NR4A1,DUSP2,SOD2,MAP3K8
1.22888e-18	0.614067	0.334	0.155	2.43379e-14	Clec4n	5		GO:BP	immune response	GO:0006955	FALSE	1.97771e-09	8.70384	1945	46	21	26944	TNF,IL23A,CCL3,BCL2A1D,IL1A,ICAM1,CCL4,CXCL3,CXCL2,TGFB1,CCRL2,CLEC4E,IL1RN,RBPJ,CLEC4N,MAPKAPK2,CSF1,CSF3,GCH1,XBP1,FAS
9.50481e-57	0.608073	0.893	0.674	1.88243e-52	Mapkapk2	5		GO:BP	response to external stimulus	GO:0009605	FALSE	2.08551e-09	8.68079	3042	46	25	26944	TNF,IL23A,CCL3,IL1A,CCL4,CXCL3,PLAUR,CXCL2,TGFB1,CCRL2,CHKA,CLEC4E,SPP1,RBPJ,CLEC4N,MAPKAPK2,CSF1,UPP1,CSF3,GCH1,XBP1,CFLAR,FAS,NR4A1,SOD2
9.93111e-40	0.597861	0.61	0.313	1.96686e-35	Morrbid	5		GO:BP	signaling	GO:0023052	FALSE	2.56495e-09	8.59092	7472	46	36	26944	TNF,BCL2A1B,IL23A,CCL3,BCL2A1D,IL1A,ICAM1,BCL2A1A,CCL4,CXCL3,MRGPRA2A,MRGPRA2B,PLAUR,CXCL2,HCAR2,TGFB1,CCRL2,CLEC4E,IL1RN,SPP1,RBPJ,KLF2,CLEC4N,MAPKAPK2,CSF1,CSF3,XBP1,GPR84,CFLAR,MARCKS,ARID5B,FAS,NR4A1,DUSP2,SOD2,MAP3K8
2.93912e-29	0.577227	0.549	0.304	5.82093e-25	Maff	5		GO:BP	inflammatory response	GO:0006954	FALSE	4.91176e-09	8.30876	811	46	15	26944	TNF,IL23A,CCL3,IL1A,ICAM1,CCL4,CXCL3,CXCL2,TGFB1,CCRL2,IL1RN,RBPJ,MAPKAPK2,CSF1,NR4A1
4.34136e-42	0.57512	0.859	0.716	8.59807e-38	Atp6v1e1	5		GO:BP	cellular response to organic substance	GO:0071310	FALSE	1.39029e-08	7.85689	2420	46	22	26944	TNF,CCL3,IL1A,ICAM1,CCL4,CXCL3,CXCL2,TGFB1,CCRL2,IL1RN,SPP1,KLF2,CSF1,CSF3,GCH1,XBP1,CFLAR,MARCKS,ARID5B,FAS,NR4A1,SOD2
2.26987e-13	0.56744	0.437	0.269	4.49548e-09	Csf1	5		GO:BP	biological process involved in interspecies interaction between organisms	GO:0044419	FALSE	1.99451e-08	7.70016	1940	46	20	26944	TNF,IL23A,CCL3,IL1A,ICAM1,CCL4,CXCL3,CXCL2,TGFB1,CLEC4E,RBPJ,CLEC4N,MAPKAPK2,CSF1,CSF3,GCH1,XBP1,CFLAR,NR4A1,SOD2
6.78563e-34	0.562119	0.832	0.655	1.34389e-29	Upp1	5		GO:BP	cellular response to cytokine stimulus	GO:0071345	FALSE	2.01622e-08	7.69546	1074	46	16	26944	TNF,CCL3,IL1A,ICAM1,CCL4,CXCL3,CXCL2,CCRL2,IL1RN,SPP1,KLF2,CSF1,CSF3,XBP1,ARID5B,FAS
5.02851e-34	0.559939	0.912	0.822	9.95897e-30	Ubc	5		GO:BP	locomotion	GO:0040011	FALSE	2.15207e-08	7.66714	1273	46	17	26944	TNF,IL23A,CCL3,IL1A,ICAM1,CCL4,CXCL3,CXCL2,TGFB1,CCRL2,IL1RN,SPP1,CSF1,XBP1,FAS,NR4A1,SOD2
5.25737e-26	0.551845	0.493	0.314	1.04122e-21	Sf3b6	5		GO:BP	response to stimulus	GO:0050896	FALSE	3.84753e-08	7.41482	10506	46	40	26944	TNF,BCL2A1B,IL23A,CCL3,BCL2A1D,IL1A,ICAM1,BCL2A1A,CCL4,CXCL3,MRGPRA2A,MRGPRA2B,PLAUR,CXCL2,HCAR2,TGFB1,CCRL2,CHKA,CLEC4E,IL1RN,SPP1,RBPJ,KLF2,CLEC4N,MAPKAPK2,CSF1,UPP1,EHD1,CSF3,GCH1,XBP1,GPR84,CFLAR,MARCKS,ARID5B,FAS,NR4A1,DUSP2,SOD2,MAP3K8
1.30638e-17	0.526502	0.61	0.413	2.58728e-13	Gm20186	5		GO:BP	cell migration	GO:0016477	FALSE	3.93994e-08	7.40451	1538	46	18	26944	TNF,IL23A,CCL3,IL1A,ICAM1,CCL4,CXCL3,CXCL2,TGFB1,CCRL2,IL1RN,SPP1,CSF1,XBP1,ARID5B,FAS,NR4A1,SOD2
5.509e-21	0.526213	0.261	0.114	1.09106e-16	Clec12a	5		GO:BP	response to other organism	GO:0051707	FALSE	4.32436e-08	7.36408	1778	46	19	26944	TNF,IL23A,CCL3,IL1A,CCL4,CXCL3,CXCL2,TGFB1,CLEC4E,RBPJ,CLEC4N,MAPKAPK2,CSF1,CSF3,GCH1,XBP1,CFLAR,NR4A1,SOD2
2.8373e-48	0.521842	0.951	0.845	5.61927e-44	Ehd1	5		GO:BP	response to external biotic stimulus	GO:0043207	FALSE	4.49575e-08	7.3472	1782	46	19	26944	TNF,IL23A,CCL3,IL1A,CCL4,CXCL3,CXCL2,TGFB1,CLEC4E,RBPJ,CLEC4N,MAPKAPK2,CSF1,CSF3,GCH1,XBP1,CFLAR,NR4A1,SOD2
3.01058e-06	0.520518	0.222	0.131	0.0596245	Csf3	5		GO:BP	leukocyte migration	GO:0050900	FALSE	5.31257e-08	7.2747	378	46	11	26944	TNF,IL23A,CCL3,IL1A,ICAM1,CCL4,CXCL3,CXCL2,TGFB1,SPP1,CSF1
1.36347e-24	0.516797	0.483	0.312	2.70035e-20	Gch1	5		GO:BP	response to lipid	GO:0033993	FALSE	5.95673e-08	7.22499	1155	46	16	26944	TNF,CCL3,IL1A,CXCL3,CXCL2,TGFB1,IL1RN,SPP1,MAPKAPK2,CSF3,GCH1,XBP1,CFLAR,FAS,NR4A1,SOD2
2.2161e-19	0.514017	0.4	0.225	4.38899e-15	Xbp1	5		GO:BP	response to biotic stimulus	GO:0009607	FALSE	6.41165e-08	7.19303	1819	46	19	26944	TNF,IL23A,CCL3,IL1A,CCL4,CXCL3,CXCL2,TGFB1,CLEC4E,RBPJ,CLEC4N,MAPKAPK2,CSF1,CSF3,GCH1,XBP1,CFLAR,NR4A1,SOD2
7.30882e-18	0.513942	0.317	0.181	1.44751e-13	Gpr84	5		GO:BP	homeostatic process	GO:0042592	FALSE	7.45683e-08	7.12745	1835	46	19	26944	TNF,CCL3,IL1A,ICAM1,BCL2A1A,MARCKSL1,HCAR2,TGFB1,IL1RN,SPP1,RBPJ,KLF2,ATP6V1E1,CSF1,EHD1,XBP1,CFLAR,FAS,SOD2
4.85225e-36	0.511001	0.81	0.565	9.60988e-32	Cflar	5		GO:BP	hemopoiesis	GO:0030097	FALSE	1.72479e-07	6.76326	1044	46	15	26944	TNF,IL23A,CCL3,BCL2A1D,IL1A,TGFB1,CLEC4E,RBPJ,KLF2,CSF1,CSF3,XBP1,CFLAR,FAS,SOD2
2.46899e-33	0.510188	0.898	0.724	4.88983e-29	Marcks	5		GO:BP	granulocyte migration	GO:0097530	FALSE	3.36868e-07	6.47254	153	46	8	26944	IL23A,CCL3,IL1A,CCL4,CXCL3,CXCL2,SPP1,CSF1
1.50765e-34	0.509208	0.651	0.343	2.9859e-30	Arid5b	5		GO:BP	cellular response to chemical stimulus	GO:0070887	FALSE	3.45972e-07	6.46096	3162	46	23	26944	TNF,IL23A,CCL3,IL1A,ICAM1,CCL4,CXCL3,CXCL2,TGFB1,CCRL2,IL1RN,SPP1,KLF2,CSF1,CSF3,GCH1,XBP1,CFLAR,MARCKS,ARID5B,FAS,NR4A1,SOD2
2.32469e-33	0.506903	0.717	0.465	4.60406e-29	Fas	5		GO:BP	extrinsic apoptotic signaling pathway	GO:0097191	FALSE	3.46099e-07	6.4608	234	46	9	26944	TNF,BCL2A1B,BCL2A1D,IL1A,ICAM1,BCL2A1A,TGFB1,CFLAR,FAS
3.16908e-19	0.499097	0.668	0.513	6.27637e-15	Nr4a1	5		GO:BP	regulation of multicellular organismal process	GO:0051239	FALSE	3.52656e-07	6.45265	3165	46	23	26944	TNF,IL23A,CCL3,IL1A,ICAM1,CCL4,PLAUR,HCAR2,TGFB1,CLEC4E,SPP1,RBPJ,KLF2,CLEC4N,MAPKAPK2,MAFF,CSF1,CSF3,GCH1,XBP1,MARCKS,FAS,NR4A1
1.9654e-10	0.496379	0.334	0.202	3.89248e-06	Dusp2	5		GO:BP	cell motility	GO:0048870	FALSE	3.58676e-07	6.4453	1760	46	18	26944	TNF,IL23A,CCL3,IL1A,ICAM1,CCL4,CXCL3,CXCL2,TGFB1,CCRL2,IL1RN,SPP1,CSF1,XBP1,ARID5B,FAS,NR4A1,SOD2
1.5545e-40	0.490789	0.92	0.67	3.0787e-36	Sod2	5		GO:BP	intracellular signal transduction	GO:0035556	FALSE	5.16839e-07	6.28664	2610	46	21	26944	TNF,BCL2A1B,CCL3,BCL2A1D,IL1A,ICAM1,BCL2A1A,CCL4,PLAUR,TGFB1,CCRL2,CLEC4N,MAPKAPK2,CSF1,CSF3,XBP1,CFLAR,FAS,DUSP2,SOD2,MAP3K8
5.49868e-26	0.489449	0.578	0.314	1.08901e-21	Map3k8	5		GO:BP	cytokine-mediated signaling pathway	GO:0019221	FALSE	5.74873e-07	6.24043	473	46	11	26944	TNF,CCL3,IL1A,CCL4,CXCL3,CXCL2,CCRL2,IL1RN,CSF1,CSF3,FAS
1.73331e-20	0.489131	0.349	0.161	3.43283e-16	Schip1	5		GO:BP	defense response	GO:0006952	FALSE	5.75192e-07	6.24019	1812	46	18	26944	TNF,IL23A,CCL3,IL1A,ICAM1,CCL4,CXCL3,CXCL2,TGFB1,CCRL2,CLEC4E,IL1RN,RBPJ,CLEC4N,MAPKAPK2,CSF1,GCH1,NR4A1
1.10779e-36	0.488318	0.946	0.787	2.19399e-32	Gadd45b	5		GO:BP	positive regulation of response to stimulus	GO:0048584	FALSE	6.69682e-07	6.17413	2359	46	20	26944	TNF,IL23A,CCL3,BCL2A1D,IL1A,ICAM1,CCL4,PLAUR,TGFB1,CLEC4E,RBPJ,KLF2,CLEC4N,MAPKAPK2,CSF1,CSF3,XBP1,CFLAR,MARCKS,FAS
1.06405e-18	0.487568	0.459	0.257	2.10734e-14	Nr4a3	5		GO:BP	positive regulation of apoptotic process	GO:0043065	FALSE	6.75749e-07	6.17021	622	46	12	26944	TNF,BCL2A1B,CCL3,BCL2A1D,BCL2A1A,HCAR2,TGFB1,XBP1,CFLAR,FAS,NR4A1,SOD2
3.19821e-31	0.484796	0.798	0.541	6.33405e-27	Ctsz	5		GO:BP	response to bacterium	GO:0009617	FALSE	7.69919e-07	6.11356	968	46	14	26944	TNF,IL23A,IL1A,CXCL3,CXCL2,CLEC4E,RBPJ,MAPKAPK2,CSF3,GCH1,XBP1,CFLAR,NR4A1,SOD2
6.86239e-30	0.479234	0.88	0.729	1.3591e-25	Cd24a	5		GO:BP	apoptotic signaling pathway	GO:0097190	FALSE	8.24692e-07	6.08371	633	46	12	26944	TNF,BCL2A1B,BCL2A1D,IL1A,ICAM1,BCL2A1A,PLAUR,TGFB1,XBP1,CFLAR,FAS,SOD2
2.20294e-29	0.478381	0.82	0.639	4.36293e-25	Rel	5		GO:BP	positive regulation of programmed cell death	GO:0043068	FALSE	9.67997e-07	6.01413	642	46	12	26944	TNF,BCL2A1B,CCL3,BCL2A1D,BCL2A1A,HCAR2,TGFB1,XBP1,CFLAR,FAS,NR4A1,SOD2
1.02987e-34	0.477722	0.873	0.654	2.03965e-30	Ninj1	5		GO:BP	positive regulation of cellular process	GO:0048522	FALSE	1.28164e-06	5.89223	6078	46	30	26944	TNF,BCL2A1B,IL23A,CCL3,BCL2A1D,IL1A,ICAM1,BCL2A1A,MARCKSL1,CCL4,PLAUR,HCAR2,TGFB1,CLEC4E,SPP1,RBPJ,KLF2,CLEC4N,MAPKAPK2,MAFF,CSF1,EHD1,CSF3,XBP1,CFLAR,MARCKS,ARID5B,FAS,NR4A1,SOD2
2.94109e-16	0.476186	0.539	0.368	5.82483e-12	Rgcc	5		GO:BP	leukocyte differentiation	GO:0002521	FALSE	1.51751e-06	5.81887	668	46	12	26944	TNF,IL23A,CCL3,BCL2A1D,IL1A,TGFB1,CLEC4E,RBPJ,CSF1,CSF3,XBP1,FAS
7.39467e-08	0.474054	0.449	0.436	0.00146451	Asprv1	5		GO:BP	positive regulation of biological process	GO:0048518	FALSE	1.62742e-06	5.7885	6589	46	31	26944	TNF,BCL2A1B,IL23A,CCL3,BCL2A1D,IL1A,ICAM1,BCL2A1A,MARCKSL1,CCL4,PLAUR,HCAR2,TGFB1,CLEC4E,SPP1,RBPJ,KLF2,CLEC4N,MAPKAPK2,MAFF,CSF1,EHD1,CSF3,GCH1,XBP1,CFLAR,MARCKS,ARID5B,FAS,NR4A1,SOD2
3.04942e-46	0.463728	1	0.999	6.03938e-42	Fth1	5		GO:BP	response to organic substance	GO:0010033	FALSE	1.81874e-06	5.74023	3435	46	23	26944	TNF,CCL3,IL1A,ICAM1,CCL4,CXCL3,CXCL2,TGFB1,CCRL2,IL1RN,SPP1,KLF2,MAPKAPK2,CSF1,CSF3,GCH1,XBP1,CFLAR,MARCKS,ARID5B,FAS,NR4A1,SOD2
2.58542e-19	0.459198	0.866	0.757	5.12042e-15	Zfp36	5		GO:BP	positive regulation of signaling	GO:0023056	FALSE	2.59732e-06	5.58547	1990	46	18	26944	TNF,CCL3,IL1A,ICAM1,CCL4,PLAUR,HCAR2,TGFB1,SPP1,RBPJ,KLF2,CLEC4N,CSF1,CSF3,XBP1,CFLAR,MARCKS,FAS
3.92578e-12	0.449774	0.361	0.25	7.775e-08	Cybb	5		GO:BP	positive regulation of cell communication	GO:0010647	FALSE	2.59732e-06	5.58547	1990	46	18	26944	TNF,CCL3,IL1A,ICAM1,CCL4,PLAUR,HCAR2,TGFB1,SPP1,RBPJ,KLF2,CLEC4N,CSF1,CSF3,XBP1,CFLAR,MARCKS,FAS
1.8463e-22	0.445782	0.507	0.277	3.65659e-18	Spata13	5		GO:BP	release of cytochrome c from mitochondria	GO:0001836	FALSE	2.80758e-06	5.55167	67	46	6	26944	BCL2A1B,BCL2A1D,BCL2A1A,PLAUR,FAS,SOD2
1.17192e-08	0.437683	0.127	0.057	0.000232099	Mir155hg	5		GO:BP	granulocyte chemotaxis	GO:0071621	FALSE	3.27795e-06	5.4844	126	46	7	26944	IL23A,CCL3,CCL4,CXCL3,CXCL2,SPP1,CSF1
2.35497e-09	0.435835	0.622	0.496	4.66402e-05	Jun	5		GO:BP	neutrophil migration	GO:1990266	FALSE	3.27795e-06	5.4844	126	46	7	26944	IL23A,CCL3,IL1A,CCL4,CXCL3,CXCL2,SPP1
2.05865e-37	0.430603	0.966	0.928	4.07717e-33	Cd9	5		GO:BP	apoptotic process	GO:0006915	FALSE	4.17136e-06	5.37972	2050	46	18	26944	TNF,BCL2A1B,CCL3,BCL2A1D,IL1A,ICAM1,BCL2A1A,PLAUR,HCAR2,TGFB1,IL1RN,SPP1,XBP1,CFLAR,MARCKS,FAS,NR4A1,SOD2
6.40958e-20	0.429799	0.676	0.487	1.26942e-15	Bhlhe40	5		GO:BP	multicellular organismal-level homeostasis	GO:0048871	FALSE	4.38299e-06	5.35823	912	46	13	26944	TNF,IL1A,BCL2A1A,HCAR2,TGFB1,IL1RN,SPP1,RBPJ,KLF2,CSF1,CFLAR,FAS,SOD2
1.02578e-15	0.427893	0.488	0.347	2.03155e-11	Rilpl2	5		GO:BP	cellular response to stress	GO:0033554	FALSE	4.52656e-06	5.34423	1799	46	17	26944	TNF,BCL2A1B,BCL2A1D,IL1A,BCL2A1A,TGFB1,CHKA,SPP1,KLF2,MAPKAPK2,UPP1,GCH1,XBP1,CFLAR,MARCKS,FAS,SOD2
1.51997e-19	0.42205	0.883	0.793	3.0103e-15	Ier5	5		GO:BP	positive regulation of multicellular organismal process	GO:0051240	FALSE	4.72073e-06	5.32599	1804	46	17	26944	TNF,IL23A,CCL3,IL1A,ICAM1,CCL4,HCAR2,TGFB1,CLEC4E,SPP1,RBPJ,CLEC4N,MAPKAPK2,CSF1,GCH1,XBP1,MARCKS
6.40748e-40	0.417863	0.988	0.981	1.269e-35	Cd14	5		GO:BP	regulation of response to stimulus	GO:0048583	FALSE	5.50535e-06	5.25922	3987	46	24	26944	TNF,IL23A,CCL3,BCL2A1D,IL1A,ICAM1,CCL4,PLAUR,TGFB1,CLEC4E,IL1RN,RBPJ,KLF2,CLEC4N,MAPKAPK2,CSF1,CSF3,GCH1,XBP1,CFLAR,MARCKS,FAS,DUSP2,SOD2
7.42226e-23	0.416616	0.634	0.396	1.46998e-18	Irak3	5		GO:BP	cell chemotaxis	GO:0060326	FALSE	5.57566e-06	5.2537	321	46	9	26944	IL23A,CCL3,CCL4,CXCL3,CXCL2,CCRL2,SPP1,CSF1,NR4A1
3.94676e-22	0.41456	0.683	0.445	7.81655e-18	Tgif1	5		GO:BP	MAPK cascade	GO:0000165	FALSE	6.2884e-06	5.20146	758	46	12	26944	TNF,CCL3,IL1A,ICAM1,CCL4,TGFB1,MAPKAPK2,XBP1,CFLAR,FAS,DUSP2,MAP3K8
1.07011e-19	0.40424	0.537	0.327	2.11936e-15	Erbin	5		GO:BP	response to lipopolysaccharide	GO:0032496	FALSE	6.41207e-06	5.193	451	46	10	26944	TNF,IL1A,CXCL3,CXCL2,MAPKAPK2,CSF3,GCH1,XBP1,NR4A1,SOD2
9.35792e-18	0.40415	0.459	0.289	1.85334e-13	Clint1	5		GO:BP	chemotaxis	GO:0006935	FALSE	6.97588e-06	5.1564	455	46	10	26944	IL23A,CCL3,CCL4,CXCL3,CXCL2,TGFB1,CCRL2,SPP1,CSF1,NR4A1
1.76999e-22	0.400893	0.893	0.818	3.50546e-18	Rab7	5		GO:BP	extrinsic apoptotic signaling pathway in absence of ligand	GO:0097192	FALSE	7.12552e-06	5.14718	78	46	6	26944	TNF,BCL2A1B,BCL2A1D,IL1A,BCL2A1A,FAS
1.46648e-16	0.397801	0.254	0.112	2.90436e-12	B9d2	5		GO:BP	taxis	GO:0042330	FALSE	7.27395e-06	5.13823	457	46	10	26944	IL23A,CCL3,CCL4,CXCL3,CXCL2,TGFB1,CCRL2,SPP1,CSF1,NR4A1
3.85798e-33	0.393961	0.978	0.952	7.64073e-29	Acod1	5		GO:BP	programmed cell death	GO:0012501	FALSE	7.37795e-06	5.13206	2125	46	18	26944	TNF,BCL2A1B,CCL3,BCL2A1D,IL1A,ICAM1,BCL2A1A,PLAUR,HCAR2,TGFB1,IL1RN,SPP1,XBP1,CFLAR,MARCKS,FAS,NR4A1,SOD2
3.65276e-23	0.39258	0.878	0.714	7.2343e-19	Ptafr	5		GO:BP	cell death	GO:0008219	FALSE	7.37795e-06	5.13206	2125	46	18	26944	TNF,BCL2A1B,CCL3,BCL2A1D,IL1A,ICAM1,BCL2A1A,PLAUR,HCAR2,TGFB1,IL1RN,SPP1,XBP1,CFLAR,MARCKS,FAS,NR4A1,SOD2
2.06776e-17	0.391472	0.698	0.488	4.09521e-13	Cd274	5		GO:BP	positive regulation of signal transduction	GO:0009967	FALSE	7.77773e-06	5.10915	1613	46	16	26944	TNF,CCL3,IL1A,ICAM1,CCL4,PLAUR,TGFB1,RBPJ,KLF2,CLEC4N,CSF1,CSF3,XBP1,CFLAR,MARCKS,FAS
1.85987e-16	0.391044	0.571	0.403	3.68347e-12	Nfkbib	5		GO:BP	signal transduction in absence of ligand	GO:0038034	FALSE	8.31519e-06	5.08013	80	46	6	26944	TNF,BCL2A1B,BCL2A1D,IL1A,BCL2A1A,FAS
1.65318e-09	0.390666	0.698	0.576	3.27412e-05	Traf1	5		GO:BP	response to molecule of bacterial origin	GO:0002237	FALSE	8.94065e-06	5.04863	467	46	10	26944	TNF,IL1A,CXCL3,CXCL2,MAPKAPK2,CSF3,GCH1,XBP1,NR4A1,SOD2
5.97357e-09	0.385797	0.346	0.226	0.000118307	Cpeb4	5		GO:BP	myeloid cell differentiation	GO:0030099	FALSE	9.12465e-06	5.03978	468	46	10	26944	TNF,IL23A,CCL3,TGFB1,RBPJ,KLF2,CSF1,CSF3,CFLAR,FAS
1.26797e-18	0.385616	0.998	0.976	2.51122e-14	Nfkbia	5		GO:BP	myeloid leukocyte migration	GO:0097529	FALSE	1.03891e-05	4.98342	236	46	8	26944	IL23A,CCL3,IL1A,CCL4,CXCL3,CXCL2,SPP1,CSF1
1.29258e-10	0.385515	0.3	0.172	2.55996e-06	F3	5		GO:BP	regulation of apoptotic process	GO:0042981	FALSE	1.15175e-05	4.93864	1658	46	16	26944	TNF,BCL2A1B,CCL3,BCL2A1D,ICAM1,BCL2A1A,PLAUR,HCAR2,TGFB1,IL1RN,SPP1,XBP1,CFLAR,FAS,NR4A1,SOD2
3.08734e-16	0.384031	0.495	0.296	6.11447e-12	Mapk6	5		GO:BP	positive regulation of cellular metabolic process	GO:0031325	FALSE	1.20979e-05	4.91729	3434	46	22	26944	TNF,IL23A,CCL3,IL1A,ICAM1,CCL4,PLAUR,TGFB1,CLEC4E,SPP1,RBPJ,KLF2,CLEC4N,MAPKAPK2,MAFF,CSF1,CSF3,XBP1,ARID5B,FAS,NR4A1,SOD2
3.81265e-16	0.383495	0.805	0.707	7.55096e-12	Fpr1	5		GO:BP	positive regulation of cellular biosynthetic process	GO:0031328	FALSE	1.3332e-05	4.87511	2799	46	20	26944	TNF,IL23A,CCL3,IL1A,ICAM1,CCL4,TGFB1,CLEC4E,SPP1,RBPJ,KLF2,CLEC4N,MAPKAPK2,MAFF,CSF1,CSF3,XBP1,ARID5B,NR4A1,SOD2
8.3659e-17	0.374732	0.61	0.41	1.65687e-12	Snx10	5		GO:BP	positive regulation of biosynthetic process	GO:0009891	FALSE	1.58244e-05	4.80067	2827	46	20	26944	TNF,IL23A,CCL3,IL1A,ICAM1,CCL4,TGFB1,CLEC4E,SPP1,RBPJ,KLF2,CLEC4N,MAPKAPK2,MAFF,CSF1,CSF3,XBP1,ARID5B,NR4A1,SOD2
1.52976e-11	0.371545	0.951	0.886	3.02969e-07	Ier3	5		GO:BP	regulation of programmed cell death	GO:0043067	FALSE	1.74226e-05	4.75889	1707	46	16	26944	TNF,BCL2A1B,CCL3,BCL2A1D,ICAM1,BCL2A1A,PLAUR,HCAR2,TGFB1,IL1RN,SPP1,XBP1,CFLAR,FAS,NR4A1,SOD2
1.41624e-16	0.371282	0.337	0.171	2.80486e-12	Cish	5		GO:BP	cellular response to oxygen-containing compound	GO:1901701	FALSE	2.38271e-05	4.62293	1497	46	15	26944	TNF,IL1A,ICAM1,CXCL3,CXCL2,TGFB1,SPP1,KLF2,CSF3,GCH1,XBP1,CFLAR,MARCKS,NR4A1,SOD2
7.8179e-13	0.370643	0.688	0.519	1.54834e-08	Cks2	5		GO:BP	regulation of cellular process	GO:0050794	FALSE	2.51508e-05	4.59945	12593	46	40	26944	TNF,BCL2A1B,IL23A,CCL3,BCL2A1D,IL1A,ICAM1,BCL2A1A,MARCKSL1,CCL4,CXCL3,MRGPRA2A,MRGPRA2B,PLAUR,CXCL2,HCAR2,TGFB1,CCRL2,CLEC4E,IL1RN,SPP1,RBPJ,KLF2,CLEC4N,MAPKAPK2,MAFF,CSF1,EHD1,CSF3,GCH1,XBP1,GPR84,CFLAR,MARCKS,ARID5B,FAS,NR4A1,DUSP2,SOD2,MAP3K8
1.06192e-20	0.36942	0.734	0.546	2.10314e-16	Nfkb1	5		GO:BP	intracellular signaling cassette	GO:0141124	FALSE	3.51681e-05	4.45385	1794	46	16	26944	TNF,CCL3,IL1A,ICAM1,CCL4,TGFB1,CCRL2,CLEC4N,MAPKAPK2,CSF1,CSF3,XBP1,CFLAR,FAS,DUSP2,MAP3K8
1.66198e-07	0.368899	0.173	0.109	0.00329155	4833438C02Rik	5		GO:BP	neutrophil chemotaxis	GO:0030593	FALSE	3.84227e-05	4.41541	103	46	6	26944	IL23A,CCL3,CCL4,CXCL3,CXCL2,SPP1
5.13214e-10	0.36879	0.29	0.166	1.01642e-05	Hspa4l	5		GO:BP	response to oxygen-containing compound	GO:1901700	FALSE	3.89318e-05	4.4097	2077	46	17	26944	TNF,CCL3,IL1A,ICAM1,CXCL3,CXCL2,TGFB1,SPP1,KLF2,MAPKAPK2,CSF3,GCH1,XBP1,CFLAR,MARCKS,NR4A1,SOD2
1.24716e-14	0.367532	0.344	0.182	2.47e-10	Egln3	5		GO:BP	positive regulation of immune system process	GO:0002684	FALSE	4.30436e-05	4.36609	1105	46	13	26944	TNF,IL23A,CCL3,BCL2A1D,IL1A,ICAM1,HCAR2,TGFB1,CLEC4E,CLEC4N,MAPKAPK2,CSF1,XBP1
1.01558e-29	0.366882	0.961	0.945	2.01135e-25	Clec4d	5		GO:BP	regulation of immune system process	GO:0002682	FALSE	4.68964e-05	4.32886	1575	46	15	26944	TNF,IL23A,CCL3,BCL2A1D,IL1A,ICAM1,HCAR2,TGFB1,CLEC4E,CLEC4N,MAPKAPK2,CSF1,CSF3,XBP1,FAS
1.95385e-32	0.366196	0.978	0.945	3.8696e-28	Lilrb4a	5		GO:BP	multicellular organism development	GO:0007275	FALSE	5.91843e-05	4.22779	4879	46	25	26944	TNF,IL23A,CCL3,IL1A,ICAM1,MARCKSL1,PLAUR,TGFB1,IL1RN,SPP1,RBPJ,KLF2,MAFF,CSF1,SF3B6,EHD1,CSF3,XBP1,CFLAR,MARCKS,ARID5B,FAS,NR4A1,DUSP2,SOD2
1.82784e-21	0.363333	0.961	0.902	3.62003e-17	Pnrc1	5		GO:BP	positive regulation of metabolic process	GO:0009893	FALSE	6.06196e-05	4.21739	3745	46	22	26944	TNF,IL23A,CCL3,IL1A,ICAM1,CCL4,PLAUR,TGFB1,CLEC4E,SPP1,RBPJ,KLF2,CLEC4N,MAPKAPK2,MAFF,CSF1,CSF3,XBP1,ARID5B,FAS,NR4A1,SOD2
1.27992e-13	0.36127	0.373	0.235	2.53488e-09	Mthfsl	5		GO:BP	positive regulation of myeloid cell differentiation	GO:0045639	FALSE	6.70341e-05	4.1737	113	46	6	26944	TNF,IL23A,CCL3,TGFB1,CSF1,CSF3
2.78856e-17	0.357715	0.91	0.849	5.52274e-13	Basp1	5		GO:BP	positive regulation of macromolecule metabolic process	GO:0010604	FALSE	7.17781e-05	4.14401	3427	46	21	26944	TNF,IL23A,CCL3,IL1A,ICAM1,CCL4,PLAUR,TGFB1,CLEC4E,SPP1,RBPJ,KLF2,CLEC4N,MAPKAPK2,MAFF,CSF1,CSF3,XBP1,ARID5B,FAS,NR4A1
1.18709e-18	0.357137	0.856	0.701	2.35104e-14	Zeb2	5		GO:BP	apoptotic mitochondrial changes	GO:0008637	FALSE	8.68707e-05	4.06113	118	46	6	26944	BCL2A1B,BCL2A1D,BCL2A1A,PLAUR,FAS,SOD2
8.42577e-17	0.356621	0.78	0.706	1.66872e-12	Fcgr3	5		GO:BP	anatomical structure development	GO:0048856	FALSE	9.13092e-05	4.03949	6269	46	28	26944	TNF,IL23A,CCL3,BCL2A1D,IL1A,ICAM1,MARCKSL1,PLAUR,TGFB1,CLEC4E,IL1RN,SPP1,RBPJ,KLF2,MAPKAPK2,MAFF,CSF1,SF3B6,EHD1,CSF3,XBP1,CFLAR,MARCKS,ARID5B,FAS,NR4A1,DUSP2,SOD2
2.12037e-09	0.355982	0.239	0.125	4.1994e-05	Pwp1	5		GO:BP	regulation of biological process	GO:0050789	FALSE	0.000111878	3.95126	13144	46	40	26944	TNF,BCL2A1B,IL23A,CCL3,BCL2A1D,IL1A,ICAM1,BCL2A1A,MARCKSL1,CCL4,CXCL3,MRGPRA2A,MRGPRA2B,PLAUR,CXCL2,HCAR2,TGFB1,CCRL2,CLEC4E,IL1RN,SPP1,RBPJ,KLF2,CLEC4N,MAPKAPK2,MAFF,CSF1,EHD1,CSF3,GCH1,XBP1,GPR84,CFLAR,MARCKS,ARID5B,FAS,NR4A1,DUSP2,SOD2,MAP3K8
6.56427e-14	0.353239	0.478	0.318	1.30005e-09	Tnfaip8	5		GO:BP	regulation of cell adhesion	GO:0030155	FALSE	0.000131518	3.88102	800	46	11	26944	TNF,IL23A,IL1A,ICAM1,PLAUR,TGFB1,IL1RN,SPP1,RBPJ,CSF1,XBP1
2.16826e-11	0.352723	0.427	0.297	4.29423e-07	Clec5a	5		GO:BP	developmental process	GO:0032502	FALSE	0.000141312	3.84982	6854	46	29	26944	TNF,IL23A,CCL3,BCL2A1D,IL1A,ICAM1,MARCKSL1,PLAUR,TGFB1,CLEC4E,IL1RN,SPP1,RBPJ,KLF2,MAPKAPK2,MAFF,ATP6V1E1,CSF1,SF3B6,EHD1,CSF3,XBP1,CFLAR,MARCKS,ARID5B,FAS,NR4A1,DUSP2,SOD2
9.40822e-18	0.352115	0.28	0.115	1.8633e-13	Rffl	5		GO:BP	regulation of intracellular signal transduction	GO:1902531	FALSE	0.000152203	3.81758	1722	46	15	26944	TNF,CCL3,IL1A,ICAM1,CCL4,PLAUR,TGFB1,CLEC4N,CSF1,CSF3,XBP1,CFLAR,FAS,DUSP2,SOD2
3.20233e-17	0.351529	0.62	0.412	6.34222e-13	Irak2	5		GO:BP	regulation of cell communication	GO:0010646	FALSE	0.000183929	3.73535	3616	46	21	26944	TNF,CCL3,IL1A,ICAM1,CCL4,PLAUR,HCAR2,TGFB1,IL1RN,SPP1,RBPJ,KLF2,CLEC4N,CSF1,CSF3,XBP1,CFLAR,MARCKS,FAS,DUSP2,SOD2
2.20043e-12	0.351431	0.417	0.273	4.35795e-08	Larp4b	5		GO:BP	regulation of signaling	GO:0023051	FALSE	0.000183929	3.73535	3616	46	21	26944	TNF,CCL3,IL1A,ICAM1,CCL4,PLAUR,HCAR2,TGFB1,IL1RN,SPP1,RBPJ,KLF2,CLEC4N,CSF1,CSF3,XBP1,CFLAR,MARCKS,FAS,DUSP2,SOD2
1.67924e-13	0.3506	0.702	0.573	3.32573e-09	Tlr2	5		GO:BP	positive regulation of tumor necrosis factor production	GO:0032760	FALSE	0.000185415	3.73185	134	46	6	26944	IL23A,CCL3,IL1A,CCL4,TGFB1,MAPKAPK2
1.79054e-13	0.349353	0.583	0.411	3.54616e-09	Zc3h12a	5		GO:BP	positive regulation of nitrogen compound metabolic process	GO:0051173	FALSE	0.000195533	3.70878	2944	46	19	26944	TNF,IL23A,CCL3,IL1A,ICAM1,PLAUR,TGFB1,SPP1,RBPJ,KLF2,CLEC4N,MAFF,CSF1,CSF3,XBP1,ARID5B,FAS,NR4A1,SOD2
3.06521e-15	0.3477	0.346	0.176	6.07065e-11	Ralgds	5		GO:BP	positive regulation of tumor necrosis factor superfamily cytokine production	GO:1903557	FALSE	0.000202478	3.69362	136	46	6	26944	IL23A,CCL3,IL1A,CCL4,TGFB1,MAPKAPK2
8.44525e-17	0.34712	0.771	0.628	1.67258e-12	Rab11fip1	5		GO:BP	negative regulation of apoptotic process	GO:0043066	FALSE	0.000202513	3.69355	1039	46	12	26944	TNF,BCL2A1B,BCL2A1D,ICAM1,BCL2A1A,PLAUR,IL1RN,SPP1,XBP1,CFLAR,FAS,SOD2
4.05811e-11	0.346828	0.434	0.271	8.0371e-07	Slc31a2	5		GO:BP	leukocyte chemotaxis	GO:0030595	FALSE	0.000203462	3.69152	229	46	7	26944	IL23A,CCL3,CCL4,CXCL3,CXCL2,SPP1,CSF1
1.78087e-19	0.3462	0.871	0.775	3.52701e-15	Ncf1	5		GO:BP	regulation of myeloid cell differentiation	GO:0045637	FALSE	0.000228884	3.64038	233	46	7	26944	TNF,IL23A,CCL3,TGFB1,CSF1,CSF3,FAS
2.44033e-19	0.345614	0.959	0.894	4.83307e-15	Slc7a11	5		GO:BP	defense response to other organism	GO:0098542	FALSE	0.000241313	3.61742	1281	46	13	26944	TNF,IL23A,CCL3,CCL4,CXCL3,CXCL2,TGFB1,CLEC4E,RBPJ,CLEC4N,MAPKAPK2,CSF1,GCH1
5.83159e-15	0.345224	0.615	0.45	1.15495e-10	Lcp2	5		GO:BP	positive regulation of myeloid leukocyte differentiation	GO:0002763	FALSE	0.000256748	3.59049	72	46	5	26944	TNF,IL23A,CCL3,TGFB1,CSF1
5.55699e-16	0.344741	0.91	0.864	1.10056e-11	Cd44	5		GO:BP	vascular process in circulatory system	GO:0003018	TRUE	0.000256938	3.59017	237	46	7	26944	TNF,ICAM1,CCL4,TGFB1,KLF2,GCH1,SOD2
1.09521e-07	0.341961	0.278	0.174	0.00216906	Arf2	5		GO:BP	regulation of MAPK cascade	GO:0043408	FALSE	0.000264961	3.57682	670	46	10	26944	TNF,CCL3,IL1A,ICAM1,CCL4,TGFB1,XBP1,CFLAR,FAS,DUSP2
2.51544e-19	0.341381	0.822	0.735	4.98182e-15	Rab20	5		GO:BP	positive regulation of cell adhesion	GO:0045785	FALSE	0.000268183	3.57157	504	46	9	26944	TNF,IL23A,IL1A,ICAM1,PLAUR,TGFB1,SPP1,CSF1,XBP1
1.81313e-14	0.340798	0.429	0.254	3.59091e-10	Mthfs	5		GO:BP	regulation of signal transduction	GO:0009966	FALSE	0.000271046	3.56696	3005	46	19	26944	TNF,CCL3,IL1A,ICAM1,CCL4,PLAUR,TGFB1,IL1RN,RBPJ,KLF2,CLEC4N,CSF1,CSF3,XBP1,CFLAR,MARCKS,FAS,DUSP2,SOD2
2.53431e-08	0.338592	0.344	0.216	0.000501921	Rhob	5		GO:BP	mononuclear cell differentiation	GO:1903131	FALSE	0.000272708	3.5643	505	46	9	26944	IL23A,BCL2A1D,IL1A,TGFB1,CLEC4E,RBPJ,CSF1,XBP1,FAS
1.23149e-12	0.338262	0.785	0.692	2.43897e-08	Klf6	5		GO:BP	negative regulation of programmed cell death	GO:0043069	FALSE	0.000275392	3.56005	1069	46	12	26944	TNF,BCL2A1B,BCL2A1D,ICAM1,BCL2A1A,PLAUR,IL1RN,SPP1,XBP1,CFLAR,FAS,SOD2
2.84781e-13	0.337814	0.446	0.308	5.64008e-09	Cyfip1	5		GO:BP	positive regulation of macromolecule biosynthetic process	GO:0010557	FALSE	0.000297082	3.52712	2697	46	18	26944	TNF,IL23A,CCL3,IL1A,CCL4,TGFB1,CLEC4E,SPP1,RBPJ,KLF2,CLEC4N,MAPKAPK2,MAFF,CSF1,CSF3,XBP1,ARID5B,NR4A1
3.72798e-26	0.336605	0.963	0.925	7.38327e-22	Plek	5		GO:BP	biological regulation	GO:0065007	FALSE	0.000301259	3.52106	13527	46	40	26944	TNF,BCL2A1B,IL23A,CCL3,BCL2A1D,IL1A,ICAM1,BCL2A1A,MARCKSL1,CCL4,CXCL3,MRGPRA2A,MRGPRA2B,PLAUR,CXCL2,HCAR2,TGFB1,CCRL2,CLEC4E,IL1RN,SPP1,RBPJ,KLF2,CLEC4N,MAPKAPK2,MAFF,CSF1,EHD1,CSF3,GCH1,XBP1,GPR84,CFLAR,MARCKS,ARID5B,FAS,NR4A1,DUSP2,SOD2,MAP3K8
1.43207e-12	0.326432	0.541	0.397	2.83622e-08	Nfkb2	5		GO:BP	multicellular organismal process	GO:0032501	FALSE	0.00030373	3.51751	9132	46	33	26944	TNF,IL23A,CCL3,BCL2A1D,IL1A,ICAM1,BCL2A1A,MARCKSL1,CCL4,PLAUR,HCAR2,TGFB1,CLEC4E,IL1RN,SPP1,RBPJ,KLF2,CLEC4N,MAPKAPK2,MAFF,CSF1,SF3B6,EHD1,CSF3,GCH1,XBP1,CFLAR,MARCKS,ARID5B,FAS,NR4A1,DUSP2,SOD2
2.83058e-14	0.321815	0.651	0.472	5.60597e-10	Casp4	5		GO:BP	tissue development	GO:0009888	FALSE	0.000361828	3.4415	2122	46	16	26944	TNF,IL1A,ICAM1,PLAUR,TGFB1,SPP1,RBPJ,KLF2,MAFF,CSF1,XBP1,CFLAR,MARCKS,ARID5B,NR4A1,DUSP2
2.54771e-08	0.318772	0.476	0.376	0.000504573	Cd74	5		GO:BP	positive regulation of cytokine production	GO:0001819	FALSE	0.000366351	3.4361	523	46	9	26944	TNF,IL23A,CCL3,IL1A,CCL4,TGFB1,CLEC4E,CLEC4N,MAPKAPK2
1.15378e-10	0.31826	0.32	0.194	2.28506e-06	Arhgef3	5		GO:BP	gland development	GO:0048732	FALSE	0.000384412	3.4152	526	46	9	26944	TNF,PLAUR,TGFB1,RBPJ,CSF1,XBP1,CFLAR,ARID5B,SOD2
2.40221e-12	0.318059	0.651	0.523	4.75757e-08	Zfp36l1	5		GO:BP	response to fluid shear stress	GO:0034405	FALSE	0.000445	3.35164	32	46	4	26944	TGFB1,SPP1,KLF2,XBP1
7.61679e-14	0.31598	0.866	0.749	1.50851e-09	Nlrp3	5		GO:BP	myeloid leukocyte differentiation	GO:0002573	FALSE	0.000493654	3.30658	261	46	7	26944	TNF,IL23A,CCL3,TGFB1,RBPJ,CSF1,CSF3
1.07369e-13	0.315292	0.332	0.168	2.12644e-09	Sephs2	5		GO:BP	regulation of biological quality	GO:0065008	FALSE	0.000526824	3.27833	3134	46	19	26944	TNF,CCL3,ICAM1,CCL4,CXCL3,PLAUR,CXCL2,HCAR2,TGFB1,CCRL2,IL1RN,SPP1,KLF2,MAPKAPK2,CSF3,GCH1,XBP1,MARCKS,SOD2
5.17892e-14	0.311788	0.729	0.573	1.02568e-09	Tnfrsf1b	5		GO:BP	chemokine-mediated signaling pathway	GO:0070098	FALSE	0.000557949	3.25341	84	46	5	26944	CCL3,CCL4,CXCL3,CXCL2,CCRL2
6.15443e-09	0.311171	0.415	0.276	0.000121889	Dleu2	5		GO:BP	epithelial cell apoptotic process	GO:1904019	FALSE	0.000569806	3.24427	162	46	6	26944	TNF,ICAM1,TGFB1,XBP1,CFLAR,FAS
2.84704e-11	0.304552	0.124	0.045	5.63856e-07	Tifa	5		GO:BP	cellular response to peptide	GO:1901653	FALSE	0.000582012	3.23507	398	46	8	26944	TNF,ICAM1,TGFB1,KLF2,XBP1,CFLAR,MARCKS,NR4A1
1.16998e-21	0.302072	0.915	0.843	2.31715e-17	Vasp	5		GO:BP	defense response to symbiont	GO:0140546	FALSE	0.000602895	3.21976	1150	46	12	26944	TNF,IL23A,CCL3,CCL4,CXCL3,CXCL2,TGFB1,CLEC4E,CLEC4N,MAPKAPK2,CSF1,GCH1
6.37644e-10	0.300844	0.744	0.654	1.26285e-05	Hspa5	5		GO:BP	muscle structure development	GO:0061061	FALSE	0.00060562	3.2178	733	46	10	26944	TNF,TGFB1,RBPJ,MAFF,EHD1,XBP1,CFLAR,ARID5B,NR4A1,SOD2
8.40179e-08	0.297174	0.512	0.392	0.00166397	Gna13	5		GO:BP	positive regulation of peptidyl-tyrosine phosphorylation	GO:0050731	FALSE	0.000612484	3.21291	164	46	6	26944	TNF,IL23A,ICAM1,TGFB1,CLEC4N,CSF3
6.96345e-08	0.294943	0.468	0.341	0.00137911	Malt1	5		GO:BP	positive regulation of leukocyte migration	GO:0002687	FALSE	0.000657752	3.18194	166	46	6	26944	IL23A,CCL3,IL1A,ICAM1,TGFB1,CSF1
0.000124501	0.293518	0.271	0.2	1	Ltb	5		GO:BP	response to endogenous stimulus	GO:0009719	FALSE	0.000690962	3.16055	1935	46	15	26944	TNF,ICAM1,CXCL2,TGFB1,IL1RN,SPP1,RBPJ,KLF2,MAPKAPK2,EHD1,XBP1,CFLAR,MARCKS,FAS,NR4A1
4.092e-10	0.291334	0.641	0.546	8.1042e-06	Tes	5		GO:BP	positive regulation of protein phosphorylation	GO:0001934	FALSE	0.000721231	3.14193	567	46	9	26944	TNF,IL23A,ICAM1,PLAUR,TGFB1,CLEC4N,CSF3,XBP1,FAS
0.00986809	0.287568	0.541	0.503	1	Socs3	5		GO:BP	cell development	GO:0048468	FALSE	0.000737841	3.13204	3202	46	19	26944	TNF,IL23A,CCL3,BCL2A1D,IL1A,ICAM1,TGFB1,CLEC4E,RBPJ,KLF2,CSF1,EHD1,CSF3,XBP1,CFLAR,MARCKS,ARID5B,FAS,SOD2
3.16611e-11	0.28492	0.276	0.167	6.27048e-07	Ptprj	5		GO:BP	positive regulation of osteoclast differentiation	GO:0045672	FALSE	0.000812217	3.09033	37	46	4	26944	TNF,IL23A,CCL3,CSF1
6.61119e-08	0.283166	0.91	0.876	0.00130935	Resf1	5		GO:BP	response to nutrient levels	GO:0031667	FALSE	0.000822571	3.08483	576	46	9	26944	TNF,IL1A,TGFB1,CHKA,SPP1,UPP1,XBP1,FAS,SOD2
1.45245e-28	0.283108	0.998	0.993	2.87657e-24	Srgn	5		GO:BP	response to glucocorticoid	GO:0051384	FALSE	0.000958642	3.01834	177	46	6	26944	TNF,CXCL2,TGFB1,IL1RN,CFLAR,FAS
1.12971e-10	0.27792	0.602	0.47	2.23739e-06	Sept7	5		GO:BP	cell differentiation	GO:0030154	FALSE	0.00102147	2.99077	4777	46	23	26944	TNF,IL23A,CCL3,BCL2A1D,IL1A,ICAM1,PLAUR,TGFB1,CLEC4E,SPP1,RBPJ,KLF2,MAFF,CSF1,EHD1,CSF3,XBP1,CFLAR,MARCKS,ARID5B,FAS,NR4A1,SOD2
2.41931e-08	0.275692	0.634	0.544	0.000479145	Slc9a3r1	5		GO:BP	cellular developmental process	GO:0048869	FALSE	0.00102541	2.9891	4778	46	23	26944	TNF,IL23A,CCL3,BCL2A1D,IL1A,ICAM1,PLAUR,TGFB1,CLEC4E,SPP1,RBPJ,KLF2,MAFF,CSF1,EHD1,CSF3,XBP1,CFLAR,MARCKS,ARID5B,FAS,NR4A1,SOD2
3.81019e-12	0.275272	0.751	0.608	7.54608e-08	Skil	5		GO:BP	epithelial cell differentiation	GO:0030855	FALSE	0.00103099	2.98674	777	46	10	26944	TNF,IL1A,ICAM1,PLAUR,TGFB1,RBPJ,KLF2,MAFF,XBP1,CFLAR
9.57821e-06	0.271887	0.42	0.319	0.189696	Eea1	5		GO:BP	response to chemokine	GO:1990868	FALSE	0.00103265	2.98605	95	46	5	26944	CCL3,CCL4,CXCL3,CXCL2,CCRL2
3.00014e-05	0.269489	0.163	0.092	0.594178	Cldn1	5		GO:BP	cellular response to chemokine	GO:1990869	FALSE	0.00103265	2.98605	95	46	5	26944	CCL3,CCL4,CXCL3,CXCL2,CCRL2
1.77761e-16	0.268139	0.937	0.862	3.52055e-12	Cd53	5		GO:BP	regulation of cell migration	GO:0030334	FALSE	0.00103794	2.98383	984	46	11	26944	TNF,IL23A,CCL3,IL1A,ICAM1,TGFB1,IL1RN,CSF1,XBP1,FAS,SOD2
4.2948e-11	0.266699	0.766	0.663	8.50586e-07	Rab8b	5		GO:BP	regulation of hemopoiesis	GO:1903706	FALSE	0.00106157	2.97405	431	46	8	26944	TNF,IL23A,CCL3,TGFB1,CSF1,CSF3,XBP1,FAS
0.000639002	0.265894	0.495	0.409	1	Ero1l	5		GO:BP	positive regulation of phosphorylation	GO:0042327	FALSE	0.00110838	2.95531	597	46	9	26944	TNF,IL23A,ICAM1,PLAUR,TGFB1,CLEC4N,CSF3,XBP1,FAS
1.95943e-07	0.265825	0.417	0.309	0.00388065	Alas1	5		GO:BP	transmembrane receptor protein tyrosine kinase signaling pathway	GO:0007169	TRUE	0.00113962	2.94324	599	46	9	26944	TNF,PLAUR,TGFB1,RBPJ,MAPKAPK2,CSF1,XBP1,MARCKS,ARID5B
1.38018e-07	0.263125	0.376	0.245	0.00273344	Batf	5		GO:BP	phosphorylation	GO:0016310	FALSE	0.00116371	2.93416	1470	46	13	26944	TNF,IL23A,CCL3,ICAM1,PLAUR,TGFB1,CHKA,CLEC4N,MAPKAPK2,CSF3,XBP1,FAS,MAP3K8
3.62392e-14	0.260133	0.778	0.606	7.17717e-10	N4bp1	5		GO:BP	cellular response to lipid	GO:0071396	FALSE	0.00118509	2.92625	789	46	10	26944	TNF,IL1A,CXCL3,CXCL2,TGFB1,SPP1,CSF3,GCH1,XBP1,CFLAR
2.05824e-13	0.259913	0.851	0.732	4.07635e-09	Card19	5		GO:BP	protein phosphorylation	GO:0006468	FALSE	0.00129681	2.88713	1236	46	12	26944	TNF,IL23A,CCL3,ICAM1,PLAUR,TGFB1,CLEC4N,MAPKAPK2,CSF3,XBP1,FAS,MAP3K8
1.05592e-11	0.259055	0.793	0.697	2.09124e-07	Smox	5		GO:BP	response to extracellular stimulus	GO:0009991	FALSE	0.00132551	2.87762	610	46	9	26944	TNF,IL1A,TGFB1,CHKA,SPP1,UPP1,XBP1,FAS,SOD2
5.9659e-21	0.258131	0.995	0.985	1.18155e-16	Mcl1	5		GO:BP	lymphocyte differentiation	GO:0030098	FALSE	0.00159423	2.79745	455	46	8	26944	IL23A,BCL2A1D,IL1A,TGFB1,CLEC4E,RBPJ,XBP1,FAS
3.25356e-07	0.256988	0.415	0.347	0.00644367	Dgat2	5		GO:BP	leukocyte activation	GO:0045321	FALSE	0.00164149	2.78476	1031	46	11	26944	TNF,IL23A,CCL3,BCL2A1D,IL1A,ICAM1,TGFB1,CLEC4E,RBPJ,XBP1,FAS
1.02234e-08	0.256694	0.702	0.626	0.000202474	Kras	5		GO:BP	cellular response to interleukin-1	GO:0071347	FALSE	0.00169926	2.76974	105	46	5	26944	CCL3,CCL4,CXCL2,IL1RN,KLF2
1.38824e-09	0.256617	0.278	0.153	2.74941e-05	Agpat4	5		GO:BP	regulation of developmental process	GO:0050793	FALSE	0.00170492	2.7683	2698	46	17	26944	TNF,IL23A,CCL3,IL1A,ICAM1,TGFB1,RBPJ,KLF2,MAFF,CSF1,EHD1,CSF3,XBP1,CFLAR,MARCKS,FAS,SOD2
0.148568	0.255898	0.346	0.315	1	Prap1	5		GO:BP	intrinsic apoptotic signaling pathway	GO:0097193	FALSE	0.00174328	2.75863	315	46	7	26944	TNF,BCL2A1B,BCL2A1D,BCL2A1A,PLAUR,XBP1,SOD2
4.05053e-06	0.255824	0.527	0.414	0.0802208	Atf3	5		GO:BP	regulation of cytokine production	GO:0001817	FALSE	0.00175586	2.75551	824	46	10	26944	TNF,IL23A,CCL3,IL1A,CCL4,TGFB1,CLEC4E,KLF2,CLEC4N,MAPKAPK2
5.19593e-14	0.254783	0.946	0.896	1.02905e-09	Samsn1	5		GO:BP	T cell differentiation	GO:0030217	FALSE	0.0017805	2.74946	316	46	7	26944	IL23A,BCL2A1D,IL1A,TGFB1,CLEC4E,XBP1,FAS
3.77339e-10	0.254419	0.788	0.661	7.4732e-06	Pik3ap1	5		GO:BP	cellular response to lipopolysaccharide	GO:0071222	FALSE	0.0017805	2.74946	316	46	7	26944	TNF,IL1A,CXCL3,CXCL2,CSF3,GCH1,XBP1
1.2179e-11	0.253105	0.876	0.811	2.41206e-07	Sdcbp	5		GO:BP	regulation of cell motility	GO:2000145	FALSE	0.00187304	2.72745	1045	46	11	26944	TNF,IL23A,CCL3,IL1A,ICAM1,TGFB1,IL1RN,CSF1,XBP1,FAS,SOD2
1.49724e-08	0.251279	0.405	0.269	0.000296529	Jak2	5		GO:BP	cytokine production	GO:0001816	FALSE	0.00187475	2.72706	830	46	10	26944	TNF,IL23A,CCL3,IL1A,CCL4,TGFB1,CLEC4E,KLF2,CLEC4N,MAPKAPK2
8.71939e-10	0.250564	0.293	0.161	1.72688e-05	Rab9	5		GO:BP	positive regulation of gene expression	GO:0010628	FALSE	0.00195307	2.70928	1285	46	12	26944	TNF,IL23A,CCL3,IL1A,CCL4,TGFB1,CLEC4E,RBPJ,CLEC4N,MAPKAPK2,CSF1,XBP1
								GO:BP	intrinsic apoptotic signaling pathway in response to DNA damage	GO:0008630	FALSE	0.00195417	2.70904	108	46	5	26944	TNF,BCL2A1B,BCL2A1D,BCL2A1A,SOD2
								GO:BP	positive regulation of intracellular signal transduction	GO:1902533	FALSE	0.00196247	2.7072	1050	46	11	26944	TNF,CCL3,IL1A,ICAM1,CCL4,TGFB1,CLEC4N,CSF1,CSF3,XBP1,CFLAR
								GO:BP	cellular response to molecule of bacterial origin	GO:0071219	FALSE	0.00206024	2.68608	323	46	7	26944	TNF,IL1A,CXCL3,CXCL2,CSF3,GCH1,XBP1
								GO:BP	leukocyte activation involved in immune response	GO:0002366	FALSE	0.00206024	2.68608	323	46	7	26944	TNF,IL23A,CCL3,ICAM1,TGFB1,CLEC4E,XBP1
								GO:BP	regulation of multicellular organismal development	GO:2000026	FALSE	0.00211326	2.67505	1550	46	13	26944	TNF,IL23A,CCL3,IL1A,TGFB1,RBPJ,KLF2,MAFF,CSF1,CSF3,XBP1,MARCKS,FAS
								GO:BP	response to corticosteroid	GO:0031960	FALSE	0.00213406	2.67079	203	46	6	26944	TNF,CXCL2,TGFB1,IL1RN,CFLAR,FAS
								GO:BP	positive regulation of nitric oxide biosynthetic process	GO:0045429	FALSE	0.00216634	2.66427	47	46	4	26944	TNF,ICAM1,KLF2,SOD2
								GO:BP	cell activation involved in immune response	GO:0002263	FALSE	0.00219093	2.65937	326	46	7	26944	TNF,IL23A,CCL3,ICAM1,TGFB1,CLEC4E,XBP1
								GO:BP	positive regulation of hemopoiesis	GO:1903708	FALSE	0.00219592	2.65838	204	46	6	26944	TNF,IL23A,CCL3,TGFB1,CSF1,XBP1
								GO:BP	positive regulation of leukocyte differentiation	GO:1902107	FALSE	0.00219592	2.65838	204	46	6	26944	TNF,IL23A,CCL3,TGFB1,CSF1,XBP1
								GO:BP	positive regulation of cell-cell adhesion	GO:0022409	FALSE	0.00223601	2.65053	327	46	7	26944	TNF,IL23A,IL1A,ICAM1,PLAUR,TGFB1,XBP1
								GO:BP	fever generation	GO:0001660	TRUE	0.00226894	2.64418	13	46	3	26944	TNF,IL1A,IL1RN
								GO:BP	response to laminar fluid shear stress	GO:0034616	FALSE	0.00226894	2.64418	13	46	3	26944	TGFB1,KLF2,XBP1
								GO:BP	regulation of ERK1 and ERK2 cascade	GO:0070372	FALSE	0.00228186	2.64171	328	46	7	26944	CCL3,IL1A,ICAM1,CCL4,TGFB1,XBP1,CFLAR
								GO:BP	anatomical structure morphogenesis	GO:0009653	FALSE	0.00235616	2.6278	2761	46	17	26944	TNF,CCL3,IL1A,ICAM1,TGFB1,IL1RN,RBPJ,KLF2,CSF1,SF3B6,EHD1,XBP1,CFLAR,MARCKS,ARID5B,NR4A1,DUSP2
								GO:BP	epithelium development	GO:0060429	FALSE	0.0023713	2.62501	1309	46	12	26944	TNF,IL1A,ICAM1,PLAUR,TGFB1,RBPJ,KLF2,MAFF,CSF1,XBP1,CFLAR,MARCKS
								GO:BP	regulation of tumor necrosis factor production	GO:0032680	FALSE	0.00252769	2.59728	209	46	6	26944	IL23A,CCL3,IL1A,CCL4,TGFB1,MAPKAPK2
								GO:BP	tumor necrosis factor production	GO:0032640	FALSE	0.00252769	2.59728	209	46	6	26944	IL23A,CCL3,IL1A,CCL4,TGFB1,MAPKAPK2
								GO:BP	positive regulation of nitric oxide metabolic process	GO:1904407	FALSE	0.00256694	2.59058	49	46	4	26944	TNF,ICAM1,KLF2,SOD2
								GO:BP	tumor necrosis factor superfamily cytokine production	GO:0071706	FALSE	0.00274567	2.56135	212	46	6	26944	IL23A,CCL3,IL1A,CCL4,TGFB1,MAPKAPK2
								GO:BP	regulation of tumor necrosis factor superfamily cytokine production	GO:1903555	FALSE	0.00274567	2.56135	212	46	6	26944	IL23A,CCL3,IL1A,CCL4,TGFB1,MAPKAPK2
								GO:BP	regulation of locomotion	GO:0040012	FALSE	0.00279972	2.55289	1089	46	11	26944	TNF,IL23A,CCL3,IL1A,ICAM1,TGFB1,IL1RN,CSF1,XBP1,FAS,SOD2
								GO:BP	positive regulation of hepatocyte proliferation	GO:2000347	FALSE	0.00288428	2.53996	14	46	3	26944	TNF,XBP1,CFLAR
								GO:BP	regulation of leukocyte differentiation	GO:1902105	FALSE	0.00295354	2.52966	341	46	7	26944	TNF,IL23A,CCL3,TGFB1,CSF1,XBP1,FAS
								GO:BP	positive regulation of cell population proliferation	GO:0008284	FALSE	0.00300598	2.52201	1097	46	11	26944	TNF,IL23A,IL1A,MARCKSL1,TGFB1,RBPJ,CSF1,CSF3,XBP1,CFLAR,NR4A1
								GO:BP	regulation of cell-cell adhesion	GO:0022407	FALSE	0.00312615	2.50499	498	46	8	26944	TNF,IL23A,IL1A,ICAM1,PLAUR,TGFB1,IL1RN,XBP1
								GO:BP	regulation of peptidyl-tyrosine phosphorylation	GO:0050730	FALSE	0.00322783	2.49109	218	46	6	26944	TNF,IL23A,ICAM1,TGFB1,CLEC4N,CSF3
								GO:BP	positive regulation of phosphorus metabolic process	GO:0010562	FALSE	0.00324758	2.48844	680	46	9	26944	TNF,IL23A,ICAM1,PLAUR,TGFB1,CLEC4N,CSF3,XBP1,FAS
								GO:BP	positive regulation of phosphate metabolic process	GO:0045937	FALSE	0.00324758	2.48844	680	46	9	26944	TNF,IL23A,ICAM1,PLAUR,TGFB1,CLEC4N,CSF3,XBP1,FAS
								GO:BP	cellular response to biotic stimulus	GO:0071216	FALSE	0.0036444	2.43837	352	46	7	26944	TNF,IL1A,CXCL3,CXCL2,CSF3,GCH1,XBP1
								GO:BP	ERK1 and ERK2 cascade	GO:0070371	FALSE	0.0036444	2.43837	352	46	7	26944	CCL3,IL1A,ICAM1,CCL4,TGFB1,XBP1,CFLAR
								GO:BP	response to chemical	GO:0042221	FALSE	0.00378056	2.42244	5561	46	24	26944	TNF,IL23A,CCL3,IL1A,ICAM1,CCL4,CXCL3,CXCL2,TGFB1,CCRL2,IL1RN,SPP1,KLF2,MAPKAPK2,CSF1,CSF3,GCH1,XBP1,CFLAR,MARCKS,ARID5B,FAS,NR4A1,SOD2
								GO:BP	regulation of response to stress	GO:0080134	FALSE	0.00393079	2.40552	1374	46	12	26944	TNF,IL23A,CCL3,IL1A,PLAUR,TGFB1,CLEC4E,CLEC4N,MAPKAPK2,GCH1,XBP1,FAS
								GO:BP	positive regulation of protein metabolic process	GO:0051247	FALSE	0.00400547	2.39735	1130	46	11	26944	TNF,IL23A,ICAM1,PLAUR,TGFB1,KLF2,CLEC4N,CSF1,CSF3,XBP1,FAS
								GO:BP	regulation of epithelial cell apoptotic process	GO:1904035	FALSE	0.00402387	2.39536	125	46	5	26944	TNF,ICAM1,TGFB1,XBP1,CFLAR
								GO:BP	regulation of anatomical structure morphogenesis	GO:0022603	FALSE	0.00403588	2.39406	904	46	10	26944	TNF,CCL3,IL1A,ICAM1,TGFB1,RBPJ,KLF2,CSF1,XBP1,MARCKS
								GO:BP	positive regulation of ERK1 and ERK2 cascade	GO:0070374	FALSE	0.00418386	2.37842	228	46	6	26944	CCL3,IL1A,ICAM1,CCL4,TGFB1,CFLAR
								GO:BP	muscle organ development	GO:0007517	FALSE	0.00422772	2.37389	360	46	7	26944	TGFB1,RBPJ,MAFF,XBP1,CFLAR,ARID5B,NR4A1
								GO:BP	response to organic cyclic compound	GO:0014070	FALSE	0.00425167	2.37144	1137	46	11	26944	TNF,CCL3,IL1A,CXCL2,TGFB1,IL1RN,SPP1,KLF2,CFLAR,FAS,SOD2
								GO:BP	positive regulation of epithelial cell proliferation	GO:0050679	FALSE	0.00440028	2.35652	230	46	6	26944	TNF,TGFB1,RBPJ,XBP1,CFLAR,NR4A1
								GO:BP	osteoclast differentiation	GO:0030316	FALSE	0.00452195	2.34467	128	46	5	26944	TNF,IL23A,CCL3,TGFB1,CSF1
								GO:BP	leukocyte homeostasis	GO:0001776	FALSE	0.00506729	2.29522	131	46	5	26944	BCL2A1A,HCAR2,TGFB1,CSF1,FAS
								GO:BP	response to interleukin-1	GO:0070555	FALSE	0.00506729	2.29522	131	46	5	26944	CCL3,CCL4,CXCL2,IL1RN,KLF2
								GO:BP	regulation of endothelial cell apoptotic process	GO:2000351	FALSE	0.0050828	2.2939	58	46	4	26944	TNF,ICAM1,TGFB1,XBP1
								GO:BP	regulation of leukocyte migration	GO:0002685	FALSE	0.00510498	2.29201	236	46	6	26944	IL23A,CCL3,IL1A,ICAM1,TGFB1,CSF1
								GO:BP	response to steroid hormone	GO:0048545	FALSE	0.00515566	2.28772	371	46	7	26944	TNF,CXCL2,TGFB1,IL1RN,SPP1,CFLAR,FAS
								GO:BP	cell activation	GO:0001775	FALSE	0.00515705	2.2876	1160	46	11	26944	TNF,IL23A,CCL3,BCL2A1D,IL1A,ICAM1,TGFB1,CLEC4E,RBPJ,XBP1,FAS
								GO:BP	peptidyl-tyrosine phosphorylation	GO:0018108	FALSE	0.00549035	2.2604	239	46	6	26944	TNF,IL23A,ICAM1,TGFB1,CLEC4N,CSF3
								GO:BP	peptidyl-tyrosine modification	GO:0018212	FALSE	0.0057602	2.23956	241	46	6	26944	TNF,IL23A,ICAM1,TGFB1,CLEC4N,CSF3
								GO:BP	regulation of cell development	GO:0060284	FALSE	0.00576841	2.23894	941	46	10	26944	TNF,IL23A,CCL3,IL1A,TGFB1,CSF1,CSF3,XBP1,MARCKS,FAS
								GO:BP	negative regulation of apoptotic signaling pathway	GO:2001234	FALSE	0.00604075	2.21891	243	46	6	26944	TNF,ICAM1,PLAUR,XBP1,CFLAR,SOD2
								GO:BP	homeostasis of number of cells	GO:0048872	FALSE	0.00614137	2.21173	381	46	7	26944	BCL2A1A,HCAR2,TGFB1,KLF2,CSF1,CFLAR,FAS
								GO:BP	cellular response to fluid shear stress	GO:0071498	FALSE	0.00643498	2.19145	18	46	3	26944	SPP1,KLF2,XBP1
								GO:BP	positive regulation of protein modification process	GO:0031401	FALSE	0.00661861	2.17923	742	46	9	26944	TNF,IL23A,ICAM1,PLAUR,TGFB1,CLEC4N,CSF3,XBP1,FAS
								GO:BP	endothelial cell apoptotic process	GO:0072577	FALSE	0.0066498	2.17719	62	46	4	26944	TNF,ICAM1,TGFB1,XBP1
								GO:BP	positive regulation of DNA-templated transcription	GO:0045893	FALSE	0.00697087	2.15671	1726	46	13	26944	TNF,IL23A,CCL3,IL1A,TGFB1,SPP1,RBPJ,KLF2,MAFF,CSF3,XBP1,ARID5B,NR4A1
								GO:BP	vasodilation	GO:0042311	FALSE	0.00709179	2.14924	63	46	4	26944	TNF,KLF2,GCH1,SOD2
								GO:BP	positive regulation of RNA biosynthetic process	GO:1902680	FALSE	0.00710508	2.14843	1729	46	13	26944	TNF,IL23A,CCL3,IL1A,TGFB1,SPP1,RBPJ,KLF2,MAFF,CSF3,XBP1,ARID5B,NR4A1
								GO:BP	response to tumor necrosis factor	GO:0034612	FALSE	0.0071118	2.14802	250	46	6	26944	TNF,CCL3,CCL4,KLF2,GCH1,FAS
								GO:BP	cell adhesion	GO:0007155	FALSE	0.00762319	2.11786	1465	46	12	26944	TNF,IL23A,IL1A,ICAM1,PLAUR,TGFB1,IL1RN,SPP1,RBPJ,CSF1,XBP1,MARCKS
								GO:BP	innate immune response	GO:0045087	FALSE	0.0080436	2.09455	977	46	10	26944	TNF,IL23A,CCL3,CCL4,TGFB1,CLEC4E,CLEC4N,MAPKAPK2,CSF1,GCH1
								GO:BP	response to peptide	GO:1901652	FALSE	0.00825126	2.08348	568	46	8	26944	TNF,ICAM1,TGFB1,KLF2,XBP1,CFLAR,MARCKS,NR4A1
								GO:BP	anatomical structure formation involved in morphogenesis	GO:0048646	FALSE	0.00842843	2.07425	1221	46	11	26944	TNF,IL1A,TGFB1,RBPJ,KLF2,SF3B6,EHD1,XBP1,CFLAR,NR4A1,DUSP2
								GO:BP	positive regulation of developmental process	GO:0051094	FALSE	0.00846303	2.07247	1480	46	12	26944	TNF,IL23A,CCL3,IL1A,TGFB1,RBPJ,CSF1,EHD1,CSF3,XBP1,MARCKS,SOD2
								GO:BP	regulation of myeloid leukocyte differentiation	GO:0002761	FALSE	0.00861794	2.0646	146	46	5	26944	TNF,IL23A,CCL3,TGFB1,CSF1
								GO:BP	regulation of cell differentiation	GO:0045595	FALSE	0.00868653	2.06115	1761	46	13	26944	TNF,IL23A,CCL3,IL1A,TGFB1,RBPJ,MAFF,CSF1,CSF3,XBP1,MARCKS,FAS,SOD2
								GO:BP	fat cell differentiation	GO:0045444	FALSE	0.00871109	2.05993	259	46	6	26944	TNF,TGFB1,XBP1,ARID5B,NR4A1,SOD2
								GO:BP	gland morphogenesis	GO:0022612	FALSE	0.00920994	2.03574	148	46	5	26944	TNF,TGFB1,CSF1,XBP1,CFLAR
								GO:BP	positive regulation of cell migration	GO:0030335	FALSE	0.0092582	2.03347	577	46	8	26944	IL23A,CCL3,IL1A,ICAM1,TGFB1,CSF1,XBP1,SOD2
								GO:BP	response to hormone	GO:0009725	FALSE	0.0105923	1.97501	1008	46	10	26944	TNF,CXCL2,TGFB1,IL1RN,SPP1,XBP1,CFLAR,MARCKS,FAS,NR4A1
								GO:BP	regulation of cell population proliferation	GO:0042127	FALSE	0.0109657	1.95996	1799	46	13	26944	TNF,IL23A,IL1A,MARCKSL1,TGFB1,RBPJ,CSF1,CSF3,XBP1,CFLAR,FAS,NR4A1,SOD2
								GO:BP	regulation of apoptotic signaling pathway	GO:2001233	FALSE	0.0110898	1.95508	417	46	7	26944	TNF,ICAM1,PLAUR,XBP1,CFLAR,FAS,SOD2
								GO:BP	vasculature development	GO:0001944	FALSE	0.0113275	1.94586	793	46	9	26944	TNF,IL1A,TGFB1,RBPJ,KLF2,XBP1,CFLAR,NR4A1,SOD2
								GO:BP	regulation of nitric oxide biosynthetic process	GO:0045428	FALSE	0.0114532	1.94107	71	46	4	26944	TNF,ICAM1,KLF2,SOD2
								GO:BP	immune effector process	GO:0002252	FALSE	0.0115595	1.93706	795	46	9	26944	TNF,IL23A,CCL3,ICAM1,TGFB1,CLEC4E,MAPKAPK2,XBP1,FAS
								GO:BP	phosphate-containing compound metabolic process	GO:0006796	FALSE	0.0119032	1.92434	2428	46	15	26944	TNF,IL23A,CCL3,ICAM1,PLAUR,TGFB1,CHKA,CLEC4N,MAPKAPK2,UPP1,CSF3,XBP1,FAS,DUSP2,MAP3K8
								GO:BP	phosphorus metabolic process	GO:0006793	FALSE	0.0132887	1.87652	2450	46	15	26944	TNF,IL23A,CCL3,ICAM1,PLAUR,TGFB1,CHKA,CLEC4N,MAPKAPK2,UPP1,CSF3,XBP1,FAS,DUSP2,MAP3K8
								GO:BP	positive regulation of cell motility	GO:2000147	FALSE	0.0134021	1.87283	607	46	8	26944	IL23A,CCL3,IL1A,ICAM1,TGFB1,CSF1,XBP1,SOD2
								GO:BP	regulation of reactive oxygen species metabolic process	GO:2000377	TRUE	0.0134643	1.87082	160	46	5	26944	TNF,TGFB1,GCH1,CFLAR,SOD2
								GO:BP	positive regulation of leukocyte cell-cell adhesion	GO:1903039	FALSE	0.0135989	1.86649	280	46	6	26944	TNF,IL23A,IL1A,ICAM1,TGFB1,XBP1
								GO:BP	T cell activation	GO:0042110	FALSE	0.014058	1.85207	611	46	8	26944	IL23A,BCL2A1D,IL1A,ICAM1,TGFB1,CLEC4E,XBP1,FAS
								GO:BP	regulation of protein phosphorylation	GO:0001932	FALSE	0.0142526	1.84611	816	46	9	26944	TNF,IL23A,ICAM1,PLAUR,TGFB1,CLEC4N,CSF3,XBP1,FAS
								GO:BP	regulation of nitric oxide metabolic process	GO:0080164	FALSE	0.014256	1.846	75	46	4	26944	TNF,ICAM1,KLF2,SOD2
								GO:BP	organelle organization	GO:0006996	FALSE	0.014672	1.83351	3518	46	18	26944	TNF,BCL2A1B,CCL3,BCL2A1D,IL1A,ICAM1,BCL2A1A,MARCKSL1,PLAUR,TGFB1,CHKA,ATP6V1E1,EHD1,CSF3,CFLAR,MARCKS,FAS,SOD2
								GO:BP	interleukin-6 production	GO:0032635	FALSE	0.0156347	1.80591	165	46	5	26944	TNF,IL1A,TGFB1,KLF2,MAPKAPK2
								GO:BP	regulation of interleukin-6 production	GO:0032675	FALSE	0.0156347	1.80591	165	46	5	26944	TNF,IL1A,TGFB1,KLF2,MAPKAPK2
								GO:BP	regulation of hepatocyte proliferation	GO:2000345	FALSE	0.0158471	1.80005	24	46	3	26944	TNF,XBP1,CFLAR
								GO:BP	positive regulation of locomotion	GO:0040017	FALSE	0.0163808	1.78567	624	46	8	26944	IL23A,CCL3,IL1A,ICAM1,TGFB1,CSF1,XBP1,SOD2
								GO:BP	extrinsic apoptotic signaling pathway via death domain receptors	GO:0008625	FALSE	0.016668	1.77812	78	46	4	26944	TNF,ICAM1,CFLAR,FAS
								GO:BP	positive regulation of transcription by RNA polymerase II	GO:0045944	FALSE	0.0170315	1.76875	1315	46	11	26944	TNF,IL23A,CCL3,IL1A,TGFB1,RBPJ,KLF2,MAFF,CSF3,XBP1,NR4A1
								GO:BP	positive regulation of RNA metabolic process	GO:0051254	FALSE	0.0173718	1.76016	1877	46	13	26944	TNF,IL23A,CCL3,IL1A,TGFB1,SPP1,RBPJ,KLF2,MAFF,CSF3,XBP1,ARID5B,NR4A1
								GO:BP	lymphocyte activation	GO:0046649	FALSE	0.0193863	1.7125	848	46	9	26944	IL23A,BCL2A1D,IL1A,ICAM1,TGFB1,CLEC4E,RBPJ,XBP1,FAS
								GO:BP	liver development	GO:0001889	FALSE	0.020223	1.69415	174	46	5	26944	TNF,TGFB1,XBP1,CFLAR,SOD2
								GO:BP	nitric oxide biosynthetic process	GO:0006809	FALSE	0.0213396	1.67081	83	46	4	26944	TNF,ICAM1,KLF2,SOD2
								GO:BP	regulation of cellular biosynthetic process	GO:0031326	FALSE	0.0214051	1.66948	5663	46	23	26944	TNF,IL23A,CCL3,IL1A,ICAM1,CCL4,PLAUR,TGFB1,CLEC4E,SPP1,RBPJ,KLF2,CLEC4N,MAPKAPK2,MAFF,CSF1,CSF3,GCH1,XBP1,CFLAR,ARID5B,NR4A1,SOD2
								GO:BP	regulation of nitrogen compound metabolic process	GO:0051171	FALSE	0.0215483	1.66659	5229	46	22	26944	TNF,IL23A,CCL3,IL1A,ICAM1,PLAUR,TGFB1,SPP1,RBPJ,KLF2,CLEC4N,MAPKAPK2,MAFF,CSF1,CSF3,GCH1,XBP1,CFLAR,ARID5B,FAS,NR4A1,SOD2
								GO:BP	hepaticobiliary system development	GO:0061008	FALSE	0.0219656	1.65826	177	46	5	26944	TNF,TGFB1,XBP1,CFLAR,SOD2
								GO:BP	animal organ development	GO:0048513	FALSE	0.0228512	1.64109	3260	46	17	26944	TNF,IL1A,ICAM1,PLAUR,TGFB1,SPP1,RBPJ,KLF2,MAPKAPK2,MAFF,CSF1,XBP1,CFLAR,ARID5B,FAS,NR4A1,SOD2
								GO:BP	positive regulation of response to external stimulus	GO:0032103	FALSE	0.0230072	1.63814	654	46	8	26944	TNF,IL23A,CCL3,TGFB1,CLEC4E,CLEC4N,MAPKAPK2,CSF1
								GO:BP	cellular homeostasis	GO:0019725	FALSE	0.0235551	1.62792	869	46	9	26944	CCL3,IL1A,ICAM1,MARCKSL1,TGFB1,SPP1,ATP6V1E1,XBP1,SOD2
								GO:BP	blood vessel diameter maintenance	GO:0097746	FALSE	0.0238234	1.623	180	46	5	26944	TNF,ICAM1,KLF2,GCH1,SOD2
								GO:BP	regulation of tube diameter	GO:0035296	FALSE	0.0238234	1.623	180	46	5	26944	TNF,ICAM1,KLF2,GCH1,SOD2
								GO:BP	regulation of biosynthetic process	GO:0009889	FALSE	0.0243977	1.61265	5706	46	23	26944	TNF,IL23A,CCL3,IL1A,ICAM1,CCL4,PLAUR,TGFB1,CLEC4E,SPP1,RBPJ,KLF2,CLEC4N,MAPKAPK2,MAFF,CSF1,CSF3,GCH1,XBP1,CFLAR,ARID5B,NR4A1,SOD2
								GO:BP	regulation of tube size	GO:0035150	FALSE	0.0244692	1.61138	181	46	5	26944	TNF,ICAM1,KLF2,GCH1,SOD2
								GO:BP	regulation of phosphorylation	GO:0042325	FALSE	0.0253335	1.5963	877	46	9	26944	TNF,IL23A,ICAM1,PLAUR,TGFB1,CLEC4N,CSF3,XBP1,FAS
								GO:BP	positive regulation of MAPK cascade	GO:0043410	FALSE	0.0275866	1.5593	480	46	7	26944	TNF,CCL3,IL1A,ICAM1,CCL4,TGFB1,CFLAR
								GO:BP	regulation of osteoclast differentiation	GO:0045670	FALSE	0.0281425	1.55064	89	46	4	26944	TNF,IL23A,CCL3,CSF1
								GO:BP	heat generation	GO:0031649	FALSE	0.0284387	1.54609	29	46	3	26944	TNF,IL1A,IL1RN
								GO:BP	nitric oxide metabolic process	GO:0046209	FALSE	0.0294148	1.53143	90	46	4	26944	TNF,ICAM1,KLF2,SOD2
								GO:BP	mononuclear cell migration	GO:0071674	FALSE	0.0301414	1.52084	189	46	5	26944	CCL3,ICAM1,CCL4,TGFB1,CSF1
								GO:BP	positive regulation of ERBB signaling pathway	GO:1901186	FALSE	0.0315608	1.50085	30	46	3	26944	PLAUR,TGFB1,RBPJ
								GO:BP	regulation of animal organ morphogenesis	GO:2000027	FALSE	0.0320857	1.49369	92	46	4	26944	TNF,TGFB1,RBPJ,CSF1
								GO:BP	reactive nitrogen species metabolic process	GO:2001057	FALSE	0.0320857	1.49369	92	46	4	26944	TNF,ICAM1,KLF2,SOD2
								GO:BP	system development	GO:0048731	FALSE	0.0329776	1.48178	4117	46	19	26944	TNF,CCL3,IL1A,ICAM1,MARCKSL1,PLAUR,TGFB1,SPP1,RBPJ,KLF2,CSF1,EHD1,XBP1,CFLAR,MARCKS,ARID5B,FAS,NR4A1,SOD2
								GO:BP	secretion by cell	GO:0032940	TRUE	0.0348305	1.45804	913	46	9	26944	TNF,CCL3,IL1A,HCAR2,TGFB1,IL1RN,SPP1,XBP1,NR4A1
								GO:BP	actin cytoskeleton organization	GO:0030036	TRUE	0.0356155	1.44836	695	46	8	26944	TNF,IL1A,ICAM1,MARCKSL1,TGFB1,CSF3,CFLAR,MARCKS
								GO:BP	response to organonitrogen compound	GO:0010243	FALSE	0.0361821	1.44151	1161	46	10	26944	TNF,IL1A,ICAM1,CXCL2,TGFB1,KLF2,XBP1,CFLAR,MARCKS,NR4A1
								GO:BP	regulation of primary metabolic process	GO:0080090	FALSE	0.0374869	1.42612	5407	46	22	26944	TNF,IL23A,CCL3,IL1A,ICAM1,PLAUR,HCAR2,TGFB1,SPP1,RBPJ,KLF2,CLEC4N,MAPKAPK2,MAFF,CSF1,CSF3,XBP1,CFLAR,ARID5B,FAS,NR4A1,SOD2
								GO:BP	cellular response to peptide hormone stimulus	GO:0071375	FALSE	0.0381506	1.4185	336	46	6	26944	TNF,TGFB1,XBP1,CFLAR,MARCKS,NR4A1
								GO:BP	epithelial cell proliferation involved in liver morphogenesis	GO:0072575	FALSE	0.0384649	1.41494	32	46	3	26944	TNF,XBP1,CFLAR
								GO:BP	hepatocyte proliferation	GO:0072574	FALSE	0.0384649	1.41494	32	46	3	26944	TNF,XBP1,CFLAR
								GO:BP	inflammatory response to antigenic stimulus	GO:0002437	FALSE	0.0395403	1.40296	97	46	4	26944	TNF,ICAM1,IL1RN,RBPJ
								GO:BP	tube development	GO:0035295	FALSE	0.0418905	1.37788	1181	46	10	26944	TNF,IL1A,TGFB1,SPP1,RBPJ,KLF2,CSF1,XBP1,MARCKS,NR4A1
								GO:BP	mitochondrion organization	GO:0007005	FALSE	0.0427757	1.3688	514	46	7	26944	BCL2A1B,BCL2A1D,BCL2A1A,PLAUR,MARCKS,FAS,SOD2
								GO:BP	response to vitamin	GO:0033273	TRUE	0.0463623	1.33384	101	46	4	26944	IL1A,TGFB1,SPP1,SOD2
								GO:BP	positive regulation of protein-containing complex assembly	GO:0031334	TRUE	0.0477355	1.32116	208	46	5	26944	TNF,ICAM1,TGFB1,CSF3,FAS
								GO:BP	response to isolation stress	GO:0035900	FALSE	0.0490022	1.30978	5	46	2	26944	TNF,SOD2
								GO:BP	regulation of metabolic process	GO:0019222	FALSE	0.0499502	1.30146	6882	46	25	26944	TNF,IL23A,CCL3,IL1A,ICAM1,CCL4,PLAUR,HCAR2,TGFB1,CLEC4E,SPP1,RBPJ,KLF2,CLEC4N,MAPKAPK2,MAFF,CSF1,CSF3,GCH1,XBP1,CFLAR,ARID5B,FAS,NR4A1,SOD2
								GO:CC	extracellular space	GO:0005615	TRUE	0.000388963	3.41009	1836	47	14	26995	TNF,IL23A,CCL3,IL1A,ICAM1,CCL4,CXCL3,CXCL2,TGFB1,IL1RN,SPP1,CSF1,CSF3,FAS
								GO:CC	extracellular region	GO:0005576	FALSE	0.00373299	2.42794	2554	47	15	26995	TNF,IL23A,CCL3,IL1A,ICAM1,CCL4,CXCL3,PLAUR,CXCL2,TGFB1,IL1RN,SPP1,CSF1,CSF3,FAS
								GO:CC	external side of plasma membrane	GO:0009897	TRUE	0.00448027	2.3487	487	47	7	26995	TNF,ICAM1,PLAUR,CCRL2,CLEC4E,CLEC4N,FAS
								GO:CC	CD95 death-inducing signaling complex	GO:0031265	TRUE	0.00660052	2.18042	5	47	2	26995	CFLAR,FAS
								GO:CC	death-inducing signaling complex	GO:0031264	FALSE	0.0138303	1.85917	7	47	2	26995	CFLAR,FAS
								GO:CC	cell surface	GO:0009986	FALSE	0.0143577	1.84291	1037	47	9	26995	TNF,IL1A,ICAM1,PLAUR,TGFB1,CCRL2,CLEC4E,CLEC4N,FAS
								KEGG	Rheumatoid arthritis	KEGG:05323	FALSE	1.15579e-10	9.93712	87	39	10	9330	TNF,IL23A,CCL3,IL1A,ICAM1,CXCL3,CXCL2,TGFB1,ATP6V1E1,CSF1
								KEGG	NF-kappa B signaling pathway	KEGG:04064	FALSE	2.53859e-08	7.59541	105	39	9	9330	TNF,BCL2A1B,BCL2A1D,ICAM1,BCL2A1A,CCL4,CXCL3,CXCL2,CFLAR
								KEGG	Cytokine-cytokine receptor interaction	KEGG:04060	FALSE	9.28188e-08	7.03236	290	39	12	9330	TNF,IL23A,CCL3,IL1A,CCL4,CXCL3,CXCL2,TGFB1,IL1RN,CSF1,CSF3,FAS
								KEGG	TNF signaling pathway	KEGG:04668	FALSE	1.44602e-06	5.83983	115	39	8	9330	TNF,ICAM1,CXCL3,CXCL2,CSF1,CFLAR,FAS,MAP3K8
								KEGG	Viral protein interaction with cytokine and cytokine receptor	KEGG:04061	FALSE	0.000151786	3.81877	92	39	6	9330	TNF,CCL3,CCL4,CXCL3,CXCL2,CSF1
								KEGG	Lipid and atherosclerosis	KEGG:05417	FALSE	0.000186357	3.72966	216	39	8	9330	TNF,CCL3,ICAM1,CXCL3,CXCL2,XBP1,FAS,SOD2
								KEGG	MAPK signaling pathway	KEGG:04010	FALSE	0.000235236	3.6285	301	39	9	9330	TNF,IL1A,TGFB1,MAPKAPK2,CSF1,FAS,NR4A1,DUSP2,MAP3K8
								KEGG	Apoptosis	KEGG:04210	FALSE	0.00146289	2.83479	136	39	6	9330	TNF,BCL2A1B,BCL2A1D,BCL2A1A,CFLAR,FAS
								KEGG	Toll-like receptor signaling pathway	KEGG:04620	FALSE	0.00492688	2.30743	103	39	5	9330	TNF,CCL3,CCL4,SPP1,MAP3K8
								KEGG	Chagas disease	KEGG:05142	FALSE	0.00492688	2.30743	103	39	5	9330	TNF,CCL3,TGFB1,CFLAR,FAS
								KEGG	Malaria	KEGG:05144	FALSE	0.00591295	2.2282	55	39	4	9330	TNF,ICAM1,TGFB1,CSF3
								KEGG	C-type lectin receptor signaling pathway	KEGG:04625	FALSE	0.00734627	2.13393	112	39	5	9330	TNF,IL23A,CLEC4E,CLEC4N,MAPKAPK2
								KEGG	Inflammatory bowel disease	KEGG:05321	FALSE	0.00947048	2.02363	62	39	4	9330	TNF,IL23A,IL1A,TGFB1
								KEGG	Leishmaniasis	KEGG:05140	FALSE	0.015197	1.81824	70	39	4	9330	TNF,IL1A,MARCKSL1,TGFB1
								KEGG	Kaposi sarcoma-associated herpesvirus infection	KEGG:05167	FALSE	0.0191787	1.71718	216	39	6	9330	ICAM1,CXCL3,CXCL2,MAPKAPK2,UBC,FAS
								KEGG	Non-alcoholic fatty liver disease	KEGG:04932	FALSE	0.03356	1.47418	155	39	5	9330	TNF,IL1A,TGFB1,XBP1,FAS
								KEGG	African trypanosomiasis	KEGG:05143	FALSE	0.0368678	1.43335	37	39	3	9330	TNF,ICAM1,FAS
								KEGG	IL-17 signaling pathway	KEGG:04657	FALSE	0.045169	1.34516	93	39	4	9330	TNF,CXCL3,CXCL2,CSF3
								KEGG	Hematopoietic cell lineage	KEGG:04640	FALSE	0.0470354	1.32758	94	39	4	9330	TNF,IL1A,CSF1,CSF3

## Sheet: 6
p_val	avg_logFC	pct.1	pct.2	p_val_adj	gene	cluster		source	term_name	term_id	highlighted	adjusted_p_value	negative_log10_of_adjusted_p_value	term_size	query_size	intersection_size	effective_domain_size	intersections
9.68093e-24	3.54039	0.169	0.085	1.91731e-19	Hbb-bs	6		GO:MF	oxidoreduction-driven active transmembrane transporter activity	GO:0015453	TRUE	1.60629e-18	17.7942	33	41	10	25063	MT-ND1,MT-CO3,MT-CYTB,MT-ND2,MT-CO2,MT-ND4,MT-CO1,MT-ND3,MT-ND5,MT-ND4L
1.90207e-293	2.0057	0.72	0.358	3.76705e-289	mt-Nd1	6		GO:MF	electron transfer activity	GO:0009055	FALSE	4.0558e-16	15.3919	54	41	10	25063	MT-ND1,MT-CO3,MT-CYTB,MT-ND2,MT-CO2,MT-ND4,MT-CO1,MT-ND3,MT-ND5,MT-ND4L
0	1.98404	0.935	0.848	0	mt-Co3	6		GO:MF	primary active transmembrane transporter activity	GO:0015399	FALSE	1.01934e-11	10.9917	142	41	10	25063	MT-ND1,MT-CO3,MT-CYTB,MT-ND2,MT-CO2,MT-ND4,MT-CO1,MT-ND3,MT-ND5,MT-ND4L
0	1.97626	0.94	0.815	0	mt-Atp6	6		GO:MF	NADH dehydrogenase (ubiquinone) activity	GO:0008137	FALSE	1.02204e-10	9.99053	18	41	6	25063	MT-ND1,MT-ND2,MT-ND4,MT-ND3,MT-ND5,MT-ND4L
0	1.95115	0.856	0.618	0	mt-Cytb	6		GO:MF	NADH dehydrogenase (quinone) activity	GO:0050136	FALSE	1.49197e-10	9.82624	19	41	6	25063	MT-ND1,MT-ND2,MT-ND4,MT-ND3,MT-ND5,MT-ND4L
5.62115e-269	1.93945	0.739	0.331	1.11327e-264	mt-Nd2	6		GO:MF	NADH dehydrogenase activity	GO:0003954	FALSE	4.08819e-10	9.38847	22	41	6	25063	MT-ND1,MT-ND2,MT-ND4,MT-ND3,MT-ND5,MT-ND4L
0	1.86952	0.938	0.821	0	mt-Co2	6		GO:MF	NAD(P)H dehydrogenase (quinone) activity	GO:0003955	FALSE	4.08819e-10	9.38847	22	41	6	25063	MT-ND1,MT-ND2,MT-ND4,MT-ND3,MT-ND5,MT-ND4L
6.85272e-287	1.64427	0.814	0.521	1.35718e-282	mt-Nd4	6		GO:MF	oxidoreductase activity, acting on NAD(P)H, quinone or similar compound as acceptor	GO:0016655	FALSE	1.48391e-08	7.82859	38	41	6	25063	MT-ND1,MT-ND2,MT-ND4,MT-ND3,MT-ND5,MT-ND4L
2.46612e-280	1.60244	0.931	0.87	4.88415e-276	mt-Co1	6		GO:MF	active transmembrane transporter activity	GO:0022804	FALSE	6.63094e-07	6.17842	435	41	10	25063	MT-ND1,MT-CO3,MT-CYTB,MT-ND2,MT-CO2,MT-ND4,MT-CO1,MT-ND3,MT-ND5,MT-ND4L
6.1603e-73	1.40664	0.315	0.038	1.22005e-68	Gm26917	6		GO:MF	oxidoreductase activity, acting on NAD(P)H	GO:0016651	FALSE	7.3997e-07	6.13079	71	41	6	25063	MT-ND1,MT-ND2,MT-ND4,MT-ND3,MT-ND5,MT-ND4L
5.06327e-102	1.15355	0.454	0.083	1.00278e-97	mt-Nd3	6		GO:MF	transporter activity	GO:0005215	FALSE	1.25616e-05	4.90096	1189	41	13	25063	MT-ND1,MT-CO3,MT-ATP6,MT-CYTB,MT-ND2,MT-CO2,MT-ND4,MT-CO1,MT-ND3,MT-ND5,APOE,MT-ND4L,VMP1
4.36378e-85	1.08734	0.454	0.147	8.64246e-81	mt-Nd5	6		GO:MF	cytochrome-c oxidase activity	GO:0004129	FALSE	6.04974e-05	4.21826	7	41	3	25063	MT-CO3,MT-CO2,MT-CO1
1.37596e-16	0.950104	0.799	0.802	2.72509e-12	Slfn4	6		GO:MF	oxidoreductase activity, acting on a heme group of donors	GO:0016675	FALSE	9.66858e-05	4.01464	8	41	3	25063	MT-CO3,MT-CO2,MT-CO1
4.29703e-34	0.934066	0.588	0.442	8.51027e-30	Ctla2a	6		GO:MF	oxidoreductase activity	GO:0016491	FALSE	0.000160834	3.79362	780	41	10	25063	MT-ND1,MT-CO3,MT-CYTB,MT-ND2,MT-CO2,MT-ND4,MT-CO1,MT-ND3,MT-ND5,MT-ND4L
2.80839e-93	0.879431	1	1	5.56201e-89	Gm42418	6		GO:MF	transmembrane transporter activity	GO:0022857	FALSE	0.000395535	3.40281	1087	41	11	25063	MT-ND1,MT-CO3,MT-ATP6,MT-CYTB,MT-ND2,MT-CO2,MT-ND4,MT-CO1,MT-ND3,MT-ND5,MT-ND4L
1.80538e-20	0.874715	0.417	0.345	3.57555e-16	Malt1	6		GO:MF	proton transmembrane transporter activity	GO:0015078	FALSE	0.000700473	3.15461	122	41	5	25063	MT-CO3,MT-ATP6,MT-CYTB,MT-CO2,MT-CO1
3.38611e-39	0.822901	0.645	0.518	6.70618e-35	Apoe	6		GO:MF	structural constituent of ribosome	GO:0003735	TRUE	0.00875299	2.05784	348	41	6	25063	RPS18,RPL10A,RPSA,RPS20,RPL32,RPS19
1.31152e-29	0.781936	0.598	0.558	2.59746e-25	Nfkb1	6		GO:BP	ATP synthesis coupled electron transport	GO:0042773	TRUE	1.92364e-13	12.7159	83	44	10	26944	MT-ND1,MT-CO3,MT-CYTB,MT-ND2,MT-CO2,MT-ND4,MT-CO1,MT-ND3,MT-ND5,MT-ND4L
9.77551e-38	0.778828	0.457	0.352	1.93604e-33	Xist	6		GO:BP	oxidative phosphorylation	GO:0006119	FALSE	1.02038e-12	11.9912	146	44	11	26944	MT-ND1,MT-CO3,MT-ATP6,MT-CYTB,MT-ND2,MT-CO2,MT-ND4,MT-CO1,MT-ND3,MT-ND5,MT-ND4L
3.55497e-13	0.760812	0.395	0.311	7.04062e-09	Prap1	6		GO:BP	respiratory electron transport chain	GO:0022904	FALSE	3.94694e-12	11.4037	111	44	10	26944	MT-ND1,MT-CO3,MT-CYTB,MT-ND2,MT-CO2,MT-ND4,MT-CO1,MT-ND3,MT-ND5,MT-ND4L
1.71685e-24	0.730018	0.648	0.573	3.40023e-20	Igha	6		GO:BP	electron transport chain	GO:0022900	FALSE	2.93357e-11	10.5326	135	44	10	26944	MT-ND1,MT-CO3,MT-CYTB,MT-ND2,MT-CO2,MT-ND4,MT-CO1,MT-ND3,MT-ND5,MT-ND4L
3.12228e-28	0.703626	0.462	0.309	6.18368e-24	Rps18	6		GO:BP	aerobic respiration	GO:0009060	FALSE	3.79856e-11	10.4204	202	44	11	26944	MT-ND1,MT-CO3,MT-ATP6,MT-CYTB,MT-ND2,MT-CO2,MT-ND4,MT-CO1,MT-ND3,MT-ND5,MT-ND4L
3.77081e-24	0.698908	0.325	0.183	7.46808e-20	Rpl10a	6		GO:BP	aerobic electron transport chain	GO:0019646	FALSE	3.40868e-10	9.46741	68	44	8	26944	MT-ND1,MT-CO3,MT-CYTB,MT-ND2,MT-ND4,MT-CO1,MT-ND3,MT-ND5
6.24023e-17	0.681645	0.201	0.194	1.23588e-12	Dock10	6		GO:BP	cellular respiration	GO:0045333	FALSE	7.18805e-10	9.14339	264	44	11	26944	MT-ND1,MT-CO3,MT-ATP6,MT-CYTB,MT-ND2,MT-CO2,MT-ND4,MT-CO1,MT-ND3,MT-ND5,MT-ND4L
3.03116e-28	0.676289	0.28	0.097	6.00322e-24	Ahnak	6		GO:BP	mitochondrial ATP synthesis coupled electron transport	GO:0042775	FALSE	1.46042e-09	8.83552	81	44	8	26944	MT-ND1,MT-CO3,MT-CYTB,MT-ND2,MT-ND4,MT-CO1,MT-ND3,MT-ND5
8.23768e-26	0.662239	0.906	0.895	1.63147e-21	Neat1	6		GO:BP	energy derivation by oxidation of organic compounds	GO:0015980	FALSE	1.72697e-08	7.76272	354	44	11	26944	MT-ND1,MT-CO3,MT-ATP6,MT-CYTB,MT-ND2,MT-CO2,MT-ND4,MT-CO1,MT-ND3,MT-ND5,MT-ND4L
7.45525e-19	0.644752	0.414	0.309	1.47651e-14	Rbm25	6		GO:BP	proton motive force-driven mitochondrial ATP synthesis	GO:0042776	FALSE	1.86484e-08	7.72936	63	44	7	26944	MT-ND1,MT-ATP6,MT-ND2,MT-ND4,MT-ND3,MT-ND5,MT-ND4L
1.95631e-29	0.629619	0.779	0.805	3.87448e-25	Ccnl1	6		GO:BP	proton motive force-driven ATP synthesis	GO:0015986	FALSE	4.00666e-08	7.39722	70	44	7	26944	MT-ND1,MT-ATP6,MT-ND2,MT-ND4,MT-ND3,MT-ND5,MT-ND4L
7.09615e-19	0.624237	0.333	0.2	1.40539e-14	C1qb	6		GO:BP	electron transport coupled proton transport	GO:0015990	FALSE	5.93818e-08	7.22635	5	44	4	26944	MT-CYTB,MT-ND4,MT-CO1,MT-ND5
1.38458e-19	0.602761	0.362	0.36	2.74216e-15	Dmxl2	6		GO:BP	energy coupled proton transmembrane transport, against electrochemical gradient	GO:0015988	TRUE	5.93818e-08	7.22635	5	44	4	26944	MT-CYTB,MT-ND4,MT-CO1,MT-ND5
2.86075e-30	0.602045	0.898	0.849	5.66571e-26	Igkc	6		GO:BP	generation of precursor metabolites and energy	GO:0006091	FALSE	5.64561e-07	6.24829	491	44	11	26944	MT-ND1,MT-CO3,MT-ATP6,MT-CYTB,MT-ND2,MT-CO2,MT-ND4,MT-CO1,MT-ND3,MT-ND5,MT-ND4L
2.92634e-26	0.565567	0.452	0.393	5.79562e-22	Rpsa	6		GO:BP	ATP biosynthetic process	GO:0006754	FALSE	5.93895e-07	6.22629	102	44	7	26944	MT-ND1,MT-ATP6,MT-ND2,MT-ND4,MT-ND3,MT-ND5,MT-ND4L
3.32378e-24	0.562057	0.836	0.869	6.58274e-20	Lars2	6		GO:BP	purine ribonucleoside triphosphate biosynthetic process	GO:0009206	FALSE	1.22568e-06	5.91162	113	44	7	26944	MT-ND1,MT-ATP6,MT-ND2,MT-ND4,MT-ND3,MT-ND5,MT-ND4L
3.75613e-21	0.555868	0.258	0.215	7.43901e-17	H2-Ab1	6		GO:BP	purine nucleoside triphosphate biosynthetic process	GO:0009145	FALSE	1.30429e-06	5.88463	114	44	7	26944	MT-ND1,MT-ATP6,MT-ND2,MT-ND4,MT-ND3,MT-ND5,MT-ND4L
1.97981e-19	0.554734	0.38	0.287	3.92102e-15	Crip1	6		GO:BP	mitochondrial electron transport, NADH to ubiquinone	GO:0006120	FALSE	1.6876e-06	5.77273	28	44	5	26944	MT-ND1,MT-ND2,MT-ND4,MT-ND3,MT-ND5
2.97934e-35	0.553064	0.995	0.998	5.90057e-31	Malat1	6		GO:BP	ribonucleoside triphosphate biosynthetic process	GO:0009201	FALSE	1.76501e-06	5.75325	119	44	7	26944	MT-ND1,MT-ATP6,MT-ND2,MT-ND4,MT-ND3,MT-ND5,MT-ND4L
2.0129e-20	0.546901	0.548	0.503	3.98655e-16	Rps20	6		GO:BP	nucleoside triphosphate biosynthetic process	GO:0009142	FALSE	2.63794e-06	5.57874	126	44	7	26944	MT-ND1,MT-ATP6,MT-ND2,MT-ND4,MT-ND3,MT-ND5,MT-ND4L
6.98859e-24	0.541271	0.541	0.496	1.38409e-19	Rpl32	6		GO:BP	proton transmembrane transport	GO:1902600	FALSE	4.98948e-06	5.30194	138	44	7	26944	MT-CO3,MT-ATP6,MT-CYTB,MT-CO2,MT-ND4,MT-CO1,MT-ND5
3.02826e-27	0.540586	0.561	0.466	5.99746e-23	Rps19	6		GO:BP	organonitrogen compound biosynthetic process	GO:1901566	TRUE	9.21905e-06	5.03531	1707	44	16	26944	MT-ND1,MT-ATP6,MT-ND2,MT-ND4,MT-ND3,MT-ND5,APOE,NFKB1,RPS18,RPL10A,RPSA,LARS2,RPS20,RPL32,RPS19,MT-ND4L
1.15951e-20	0.528547	0.462	0.456	2.29642e-16	Chd2	6		GO:BP	response to stress	GO:0006950	TRUE	9.66987e-06	5.01458	3936	44	23	26944	MT-ND1,MT-ATP6,MT-CYTB,MT-CO2,MT-ND4,MT-CO1,MT-ND3,MT-ND5,CTLA2A,MALT1,APOE,NFKB1,PRAP1,IGHA,AHNAK,NEAT1,C1QB,H2-AB1,CRIP1,RPS19,CHD2,ZEB2,NFAT5
4.4304e-20	0.528469	0.754	0.782	8.77442e-16	Spag9	6		GO:BP	purine ribonucleotide biosynthetic process	GO:0009152	FALSE	8.82704e-05	4.05418	209	44	7	26944	MT-ND1,MT-ATP6,MT-ND2,MT-ND4,MT-ND3,MT-ND5,MT-ND4L
3.4229e-12	0.526456	0.367	0.297	6.77905e-08	Ccnl2	6		GO:BP	ribonucleotide biosynthetic process	GO:0009260	FALSE	0.000141792	3.84835	224	44	7	26944	MT-ND1,MT-ATP6,MT-ND2,MT-ND4,MT-ND3,MT-ND5,MT-ND4L
1.25127e-19	0.521535	0.717	0.713	2.47815e-15	Zeb2	6		GO:BP	ATP metabolic process	GO:0046034	FALSE	0.000169806	3.77005	230	44	7	26944	MT-ND1,MT-ATP6,MT-ND2,MT-ND4,MT-ND3,MT-ND5,MT-ND4L
1.11104e-16	0.517786	0.283	0.237	2.20041e-12	Nfat5	6		GO:BP	ribose phosphate biosynthetic process	GO:0046390	FALSE	0.000169806	3.77005	230	44	7	26944	MT-ND1,MT-ATP6,MT-ND2,MT-ND4,MT-ND3,MT-ND5,MT-ND4L
8.94922e-38	0.510767	0.201	0.033	1.77239e-33	mt-Nd4l	6		GO:BP	response to abiotic stimulus	GO:0009628	FALSE	0.000178077	3.74939	1300	44	13	26944	MT-ND1,MT-ATP6,MT-CYTB,MT-CO2,MT-ND4,MT-CO1,MT-ND3,MT-ND5,NFKB1,PRAP1,CRIP1,ZEB2,NFAT5
3.35801e-13	0.509474	0.313	0.229	6.65054e-09	Pnisr	6		GO:BP	purine nucleotide biosynthetic process	GO:0006164	FALSE	0.000226872	3.64422	240	44	7	26944	MT-ND1,MT-ATP6,MT-ND2,MT-ND4,MT-ND3,MT-ND5,MT-ND4L
2.33148e-19	0.508772	0.717	0.724	4.6175e-15	Son	6		GO:BP	purine-containing compound biosynthetic process	GO:0072522	FALSE	0.000283478	3.54748	248	44	7	26944	MT-ND1,MT-ATP6,MT-ND2,MT-ND4,MT-ND3,MT-ND5,MT-ND4L
3.32344e-15	0.503768	0.268	0.168	6.58207e-11	Rpl36a	6		GO:BP	purine ribonucleoside triphosphate metabolic process	GO:0009205	FALSE	0.000333376	3.47707	254	44	7	26944	MT-ND1,MT-ATP6,MT-ND2,MT-ND4,MT-ND3,MT-ND5,MT-ND4L
7.51517e-07	0.500458	0.563	0.578	0.0148838	Vmp1	6		GO:BP	ribonucleoside triphosphate metabolic process	GO:0009199	FALSE	0.000411273	3.38587	262	44	7	26944	MT-ND1,MT-ATP6,MT-ND2,MT-ND4,MT-ND3,MT-ND5,MT-ND4L
4.90135e-18	0.500236	0.184	0.07	9.70713e-14	Cd83	6		GO:BP	purine nucleoside triphosphate metabolic process	GO:0009144	FALSE	0.000411273	3.38587	262	44	7	26944	MT-ND1,MT-ATP6,MT-ND2,MT-ND4,MT-ND3,MT-ND5,MT-ND4L
9.058e-12	0.49352	0.199	0.146	1.79394e-07	Pf4	6		GO:BP	cytoplasmic translation	GO:0002181	TRUE	0.000417379	3.37947	158	44	6	26944	RPS18,RPL10A,RPSA,RPS20,RPL32,RPS19
1.93249e-15	0.493406	0.325	0.212	3.8273e-11	H2-Aa	6		GO:BP	nucleotide biosynthetic process	GO:0009165	FALSE	0.000613742	3.21201	278	44	7	26944	MT-ND1,MT-ATP6,MT-ND2,MT-ND4,MT-ND3,MT-ND5,MT-ND4L
1.60586e-14	0.49011	0.3	0.199	3.1804e-10	Rpl3	6		GO:BP	nucleoside triphosphate metabolic process	GO:0009141	FALSE	0.000628777	3.2015	279	44	7	26944	MT-ND1,MT-ATP6,MT-ND2,MT-ND4,MT-ND3,MT-ND5,MT-ND4L
3.01976e-15	0.486198	0.409	0.303	5.98063e-11	Ptma	6		GO:BP	nucleoside phosphate biosynthetic process	GO:1901293	FALSE	0.000659781	3.1806	281	44	7	26944	MT-ND1,MT-ATP6,MT-ND2,MT-ND4,MT-ND3,MT-ND5,MT-ND4L
2.82288e-11	0.479622	0.402	0.332	5.59072e-07	Luc7l2	6		GO:BP	response to oxygen levels	GO:0070482	FALSE	0.0010886	2.96313	447	44	8	26944	MT-ND1,MT-ATP6,MT-CYTB,MT-CO2,MT-ND4,MT-CO1,MT-ND5,ZEB2
8.03645e-25	0.479235	0.665	0.677	1.59162e-20	Rpl13	6		GO:BP	response to decreased oxygen levels	GO:0036293	FALSE	0.00520128	2.28389	383	44	7	26944	MT-ND1,MT-CYTB,MT-CO2,MT-ND4,MT-CO1,MT-ND5,ZEB2
3.87614e-24	0.477683	0.68	0.641	7.67669e-20	Rps8	6		GO:BP	mitochondrial respiratory chain complex I assembly	GO:0032981	TRUE	0.00619143	2.20821	62	44	4	26944	MT-ND1,MT-ND2,MT-ND4,MT-ND5
5.55557e-09	0.473515	0.189	0.209	0.000110028	Ikbke	6		GO:BP	NADH dehydrogenase complex assembly	GO:0010257	FALSE	0.00619143	2.20821	62	44	4	26944	MT-ND1,MT-ND2,MT-ND4,MT-ND5
1.67502e-15	0.472202	0.243	0.143	3.31738e-11	Macf1	6		GO:BP	cellular nitrogen compound biosynthetic process	GO:0044271	FALSE	0.00735088	2.13366	4715	44	21	26944	MT-ND1,MT-ATP6,MT-ND2,MT-ND4,MT-ND3,MT-ND5,APOE,NFKB1,RPS18,RPL10A,CCNL1,RPSA,LARS2,RPS20,RPL32,RPS19,CHD2,CCNL2,ZEB2,NFAT5,MT-ND4L
6.15562e-10	0.472049	0.37	0.234	1.21912e-05	Fosb	6		GO:BP	carbohydrate derivative biosynthetic process	GO:1901137	FALSE	0.0170129	1.76922	648	44	8	26944	MT-ND1,MT-ATP6,MT-ND2,MT-ND4,MT-ND3,MT-ND5,NFKB1,MT-ND4L
2.32982e-08	0.469809	0.266	0.18	0.000461421	Ccl2	6		GO:BP	purine ribonucleotide metabolic process	GO:0009150	FALSE	0.0177357	1.75115	462	44	7	26944	MT-ND1,MT-ATP6,MT-ND2,MT-ND4,MT-ND3,MT-ND5,MT-ND4L
2.2868e-12	0.465558	0.275	0.248	4.52902e-08	Jchain	6		GO:BP	ribonucleotide metabolic process	GO:0009259	FALSE	0.0236493	1.62618	483	44	7	26944	MT-ND1,MT-ATP6,MT-ND2,MT-ND4,MT-ND3,MT-ND5,MT-ND4L
8.64995e-11	0.460003	0.397	0.383	1.71312e-06	Cd74	6		GO:BP	ribose phosphate metabolic process	GO:0019693	FALSE	0.0277065	1.55742	495	44	7	26944	MT-ND1,MT-ATP6,MT-ND2,MT-ND4,MT-ND3,MT-ND5,MT-ND4L
3.54924e-17	0.457854	0.571	0.561	7.02927e-13	Rps15a	6		GO:BP	regulation of RNA splicing	GO:0043484	TRUE	0.0298029	1.52574	193	44	5	26944	AHNAK,RBM25,CCNL1,CCNL2,SON
2.39399e-09	0.45715	0.258	0.18	4.7413e-05	C1qa	6		GO:BP	cellular metabolic process	GO:0044237	FALSE	0.035163	1.45391	12956	44	35	26944	MT-ND1,MT-CO3,MT-ATP6,MT-CYTB,MT-ND2,MT-CO2,MT-ND4,MT-CO1,MT-ND3,MT-ND5,CTLA2A,MALT1,APOE,NFKB1,RPS18,RPL10A,AHNAK,RBM25,CCNL1,RPSA,LARS2,H2-AB1,CRIP1,RPS20,RPL32,RPS19,CHD2,SPAG9,CCNL2,ZEB2,NFAT5,MT-ND4L,SON,VMP1,CD83
1.22866e-14	0.45641	0.412	0.317	2.43336e-10	Rpl36	6		GO:BP	response to hypoxia	GO:0001666	FALSE	0.0412064	1.38504	350	44	6	26944	MT-ND1,MT-CYTB,MT-CO2,MT-ND4,MT-CO1,MT-ND5
3.32593e-12	0.452712	0.278	0.214	6.587e-08	Zc3h7a	6		GO:BP	mitochondrial respiratory chain complex assembly	GO:0033108	FALSE	0.0449787	1.34699	102	44	4	26944	MT-ND1,MT-ND2,MT-ND4,MT-ND5
2.24899e-15	0.451809	0.444	0.473	4.45412e-11	Slc11a1	6		GO:CC	respiratory chain complex	GO:0098803	FALSE	3.97903e-14	13.4002	90	43	10	26995	MT-ND1,MT-CO3,MT-CYTB,MT-ND2,MT-CO2,MT-ND4,MT-CO1,MT-ND3,MT-ND5,MT-ND4L
1.06739e-11	0.449465	0.382	0.336	2.11397e-07	Tmsb10	6		GO:CC	mitochondrial respirasome	GO:0005746	TRUE	3.97903e-14	13.4002	90	43	10	26995	MT-ND1,MT-CO3,MT-CYTB,MT-ND2,MT-CO2,MT-ND4,MT-CO1,MT-ND3,MT-ND5,MT-ND4L
4.02358e-10	0.44591	0.526	0.442	7.9687e-06	Ankrd11	6		GO:CC	respirasome	GO:0070469	FALSE	1.07281e-13	12.9695	99	43	10	26995	MT-ND1,MT-CO3,MT-CYTB,MT-ND2,MT-CO2,MT-ND4,MT-CO1,MT-ND3,MT-ND5,MT-ND4L
1.68242e-17	0.443619	0.315	0.349	3.33202e-13	Tet2	6		GO:CC	inner mitochondrial membrane protein complex	GO:0098800	FALSE	1.18956e-13	12.9246	150	43	11	26995	MT-ND1,MT-CO3,MT-ATP6,MT-CYTB,MT-ND2,MT-CO2,MT-ND4,MT-CO1,MT-ND3,MT-ND5,MT-ND4L
1.78627e-11	0.440228	0.328	0.279	3.53771e-07	Rpl12	6		GO:CC	mitochondrial protein-containing complex	GO:0098798	FALSE	2.32506e-10	9.63357	298	43	11	26995	MT-ND1,MT-CO3,MT-ATP6,MT-CYTB,MT-ND2,MT-CO2,MT-ND4,MT-CO1,MT-ND3,MT-ND5,MT-ND4L
5.17091e-10	0.439555	0.186	0.18	1.0241e-05	Amn1	6		GO:CC	oxidoreductase complex	GO:1990204	FALSE	3.43568e-09	8.46399	120	43	8	26995	MT-ND1,MT-CYTB,MT-ND2,MT-ND4,MT-CO1,MT-ND3,MT-ND5,MT-ND4L
1.59404e-10	0.436752	0.248	0.198	3.157e-06	Ascc3	6		GO:CC	respiratory chain complex I	GO:0045271	FALSE	3.83962e-08	7.41571	50	43	6	26995	MT-ND1,MT-ND2,MT-ND4,MT-ND3,MT-ND5,MT-ND4L
1.42132e-11	0.434853	0.288	0.286	2.81493e-07	Dot1l	6		GO:CC	mitochondrial respiratory chain complex I	GO:0005747	FALSE	3.83962e-08	7.41571	50	43	6	26995	MT-ND1,MT-ND2,MT-ND4,MT-ND3,MT-ND5,MT-ND4L
7.51321e-11	0.433603	0.243	0.141	1.48799e-06	Atrx	6		GO:CC	NADH dehydrogenase complex	GO:0030964	FALSE	3.83962e-08	7.41571	50	43	6	26995	MT-ND1,MT-ND2,MT-ND4,MT-ND3,MT-ND5,MT-ND4L
1.65822e-10	0.433209	0.171	0.095	3.28411e-06	Selenop	6		GO:CC	mitochondrial inner membrane	GO:0005743	FALSE	1.31513e-07	6.88103	539	43	11	26995	MT-ND1,MT-CO3,MT-ATP6,MT-CYTB,MT-ND2,MT-CO2,MT-ND4,MT-CO1,MT-ND3,MT-ND5,MT-ND4L
6.37082e-11	0.431588	0.191	0.129	1.26174e-06	S100a4	6		GO:CC	organelle inner membrane	GO:0019866	FALSE	3.57518e-07	6.4467	593	43	11	26995	MT-ND1,MT-CO3,MT-ATP6,MT-CYTB,MT-ND2,MT-CO2,MT-ND4,MT-CO1,MT-ND3,MT-ND5,MT-ND4L
7.36604e-19	0.43045	0.132	0.028	1.45884e-14	Mafb	6		GO:CC	protein-containing complex	GO:0032991	TRUE	2.20795e-06	5.65601	7427	43	30	26995	MT-ND1,MT-CO3,MT-ATP6,MT-CYTB,MT-ND2,MT-CO2,MT-ND4,MT-CO1,MT-ND3,MT-ND5,MALT1,APOE,NFKB1,IGHA,RPS18,RPL10A,AHNAK,CCNL1,C1QB,DMXL2,RPSA,H2-AB1,RPS20,RPL32,RPS19,CHD2,CCNL2,ZEB2,NFAT5,MT-ND4L
6.09295e-07	0.430248	0.228	0.212	0.0120671	Atf7ip	6		GO:CC	mitochondrial membrane	GO:0031966	FALSE	6.99216e-06	5.15539	791	43	11	26995	MT-ND1,MT-CO3,MT-ATP6,MT-CYTB,MT-ND2,MT-CO2,MT-ND4,MT-CO1,MT-ND3,MT-ND5,MT-ND4L
1.43028e-10	0.430017	0.561	0.56	2.83267e-06	Atp2b1	6		GO:CC	membrane protein complex	GO:0098796	FALSE	8.77614e-06	5.0567	1242	43	13	26995	MT-ND1,MT-CO3,MT-ATP6,MT-CYTB,MT-ND2,MT-CO2,MT-ND4,MT-CO1,MT-ND3,MT-ND5,AHNAK,H2-AB1,MT-ND4L
3.37001e-11	0.429833	0.109	0.031	6.67431e-07	Klf4	6		GO:CC	cytosolic ribosome	GO:0022626	TRUE	1.31148e-05	4.88224	130	43	6	26995	RPS18,RPL10A,RPSA,RPS20,RPL32,RPS19
2.69335e-10	0.429469	0.313	0.273	5.33418e-06	Mef2a	6		GO:CC	mitochondrial envelope	GO:0005740	FALSE	1.33526e-05	4.87443	843	43	11	26995	MT-ND1,MT-CO3,MT-ATP6,MT-CYTB,MT-ND2,MT-CO2,MT-ND4,MT-CO1,MT-ND3,MT-ND5,MT-ND4L
1.58651e-08	0.424341	0.66	0.693	0.000314208	Nktr	6		GO:CC	cytoplasm	GO:0005737	FALSE	5.58973e-05	4.25261	11561	43	35	26995	MT-ND1,MT-CO3,MT-ATP6,MT-CYTB,MT-ND2,MT-CO2,MT-ND4,MT-CO1,MT-ND3,MT-ND5,SLFN4,MALT1,APOE,NFKB1,PRAP1,RPS18,RPL10A,DOCK10,AHNAK,RBM25,CCNL1,DMXL2,RPSA,LARS2,H2-AB1,CRIP1,RPS20,RPL32,RPS19,SPAG9,ZEB2,NFAT5,MT-ND4L,PNISR,VMP1
2.05933e-13	0.424065	0.256	0.241	4.0785e-09	Gsap	6		GO:CC	transmembrane transporter complex	GO:1902495	FALSE	6.48535e-05	4.18807	420	43	8	26995	MT-ND1,MT-CYTB,MT-ND2,MT-ND4,MT-CO1,MT-ND3,MT-ND5,MT-ND4L
5.83675e-07	0.422457	0.203	0.211	0.0115597	Syne1	6		GO:CC	transporter complex	GO:1990351	FALSE	0.000102141	3.9908	446	43	8	26995	MT-ND1,MT-CYTB,MT-ND2,MT-ND4,MT-CO1,MT-ND3,MT-ND5,MT-ND4L
1.30639e-09	0.421414	0.243	0.152	2.58731e-05	Lgals1	6		GO:CC	cytochrome complex	GO:0070069	FALSE	0.000109651	3.95999	40	43	4	26995	MT-CO3,MT-CYTB,MT-CO2,MT-CO1
1.04521e-12	0.419852	0.63	0.628	2.07004e-08	Lyst	6		GO:CC	organelle envelope	GO:0031967	FALSE	0.000132048	3.87927	1305	43	12	26995	MT-ND1,MT-CO3,MT-ATP6,MT-CYTB,MT-ND2,MT-CO2,MT-ND4,MT-CO1,MT-ND3,MT-ND5,APOE,MT-ND4L
1.82343e-14	0.419641	0.434	0.363	3.61131e-10	Rpl15	6		GO:CC	envelope	GO:0031975	FALSE	0.000132048	3.87927	1305	43	12	26995	MT-ND1,MT-CO3,MT-ATP6,MT-CYTB,MT-ND2,MT-CO2,MT-ND4,MT-CO1,MT-ND3,MT-ND5,APOE,MT-ND4L
4.0835e-08	0.41856	0.273	0.176	0.000808738	Tra2b	6		GO:CC	ribosomal subunit	GO:0044391	FALSE	0.000176884	3.75231	202	43	6	26995	RPS18,RPL10A,RPSA,RPS20,RPL32,RPS19
4.44494e-15	0.411903	0.511	0.479	8.8032e-11	Rpl11	6		GO:CC	cytosolic small ribosomal subunit	GO:0022627	FALSE	0.000177736	3.75023	45	43	4	26995	RPS18,RPSA,RPS20,RPS19
2.98839e-19	0.411362	0.63	0.641	5.9185e-15	Rps23	6		GO:CC	catalytic complex	GO:1902494	FALSE	0.000548905	3.2605	1783	43	13	26995	MT-ND1,MT-CO3,MT-ATP6,MT-CYTB,MT-ND2,MT-CO2,MT-ND4,MT-CO1,MT-ND3,MT-ND5,CCNL1,CCNL2,MT-ND4L
2.74593e-18	0.410747	0.409	0.387	5.43832e-14	Rps4x	6		GO:CC	mitochondrion	GO:0005739	FALSE	0.00107548	2.9684	1895	43	13	26995	MT-ND1,MT-CO3,MT-ATP6,MT-CYTB,MT-ND2,MT-CO2,MT-ND4,MT-CO1,MT-ND3,MT-ND5,NFKB1,LARS2,MT-ND4L
1.15758e-06	0.406298	0.146	0.073	0.0229259	Hspa1a	6		GO:CC	mitochondrial respiratory chain complex IV	GO:0005751	FALSE	0.0018944	2.72253	25	43	3	26995	MT-CO3,MT-CO2,MT-CO1
4.05271e-17	0.405961	0.891	0.927	8.02639e-13	Lilr4b	6		GO:CC	small ribosomal subunit	GO:0015935	FALSE	0.00190381	2.72038	81	43	4	26995	RPS18,RPSA,RPS20,RPS19
4.57307e-11	0.405346	0.481	0.5	9.05697e-07	Mirt1	6		GO:CC	respiratory chain complex IV	GO:0045277	FALSE	0.00268931	2.57036	28	43	3	26995	MT-CO3,MT-CO2,MT-CO1
3.40952e-15	0.404092	0.499	0.488	6.75256e-11	Rpl6	6		GO:CC	intracellular organelle	GO:0043229	FALSE	0.00491206	2.30874	15836	43	38	26995	MT-ND1,MT-CO3,MT-ATP6,MT-CYTB,MT-ND2,MT-CO2,MT-ND4,MT-CO1,MT-ND3,MT-ND5,SLFN4,MALT1,APOE,NFKB1,PRAP1,RPS18,RPL10A,DOCK10,AHNAK,NEAT1,RBM25,CCNL1,DMXL2,RPSA,LARS2,H2-AB1,RPS20,RPL32,RPS19,CHD2,SPAG9,CCNL2,ZEB2,NFAT5,MT-ND4L,PNISR,SON,VMP1
5.96392e-09	0.404004	0.4	0.319	0.000118115	Ctss	6		GO:CC	organelle	GO:0043226	FALSE	0.00941585	2.02614	16169	43	38	26995	MT-ND1,MT-CO3,MT-ATP6,MT-CYTB,MT-ND2,MT-CO2,MT-ND4,MT-CO1,MT-ND3,MT-ND5,SLFN4,MALT1,APOE,NFKB1,PRAP1,RPS18,RPL10A,DOCK10,AHNAK,NEAT1,RBM25,CCNL1,DMXL2,RPSA,LARS2,H2-AB1,RPS20,RPL32,RPS19,CHD2,SPAG9,CCNL2,ZEB2,NFAT5,MT-ND4L,PNISR,SON,VMP1
1.11137e-11	0.402262	0.333	0.298	2.20107e-07	Rack1	6		GO:CC	ribosome	GO:0005840	FALSE	0.0114948	1.9395	420	43	6	26995	RPS18,RPL10A,RPSA,RPS20,RPL32,RPS19
5.51518e-16	0.401837	0.141	0.039	1.09228e-11	Ifi203	6		GO:CC	intracellular anatomical structure	GO:0005622	FALSE	0.0196615	1.70638	17412	43	39	26995	MT-ND1,MT-CO3,MT-ATP6,MT-CYTB,MT-ND2,MT-CO2,MT-ND4,MT-CO1,MT-ND3,MT-ND5,SLFN4,MALT1,APOE,NFKB1,PRAP1,RPS18,RPL10A,DOCK10,AHNAK,NEAT1,RBM25,CCNL1,DMXL2,RPSA,LARS2,H2-AB1,CRIP1,RPS20,RPL32,RPS19,CHD2,SPAG9,CCNL2,ZEB2,NFAT5,MT-ND4L,PNISR,SON,VMP1
8.01136e-09	0.401153	0.261	0.255	0.000158665	Tpbpa	6		GO:CC	intracellular membrane-bounded organelle	GO:0043231	FALSE	0.0285254	1.54477	14435	43	35	26995	MT-ND1,MT-CO3,MT-ATP6,MT-CYTB,MT-ND2,MT-CO2,MT-ND4,MT-CO1,MT-ND3,MT-ND5,SLFN4,MALT1,APOE,NFKB1,PRAP1,RPS18,DOCK10,AHNAK,NEAT1,RBM25,CCNL1,DMXL2,RPSA,LARS2,H2-AB1,RPS19,CHD2,SPAG9,CCNL2,ZEB2,NFAT5,MT-ND4L,PNISR,SON,VMP1
4.85158e-07	0.400591	0.377	0.362	0.00960856	Mbnl2	6		GO:CC	organelle membrane	GO:0031090	FALSE	0.0289604	1.5382	3365	43	15	26995	MT-ND1,MT-CO3,MT-ATP6,MT-CYTB,MT-ND2,MT-CO2,MT-ND4,MT-CO1,MT-ND3,MT-ND5,DMXL2,H2-AB1,SPAG9,MT-ND4L,VMP1
7.23303e-11	0.397938	0.598	0.544	1.4325e-06	Srrm2	6		GO:CC	mitochondrial respiratory chain complex III	GO:0005750	FALSE	0.036306	1.44002	12	43	2	26995	MT-CYTB,MT-CO1
5.36699e-09	0.396568	0.573	0.624	0.000106293	N4bp1	6		GO:CC	respiratory chain complex III	GO:0045275	FALSE	0.036306	1.44002	12	43	2	26995	MT-CYTB,MT-CO1
3.29497e-07	0.394757	0.233	0.216	0.0065257	Cpeb2	6		GO:CC	synapse	GO:0045202	TRUE	0.045401	1.34293	1641	43	10	26995	APOE,RPS18,DOCK10,C1QB,DMXL2,RPSA,RPS20,RPL32,RPS19,PNISR
1.58775e-06	0.393719	0.29	0.203	0.0314454	Nisch	6		KEGG	Oxidative phosphorylation	KEGG:00190	FALSE	6.61864e-12	11.1792	134	29	11	9330	MT-ND1,MT-CO3,MT-ATP6,MT-CYTB,MT-ND2,MT-CO2,MT-ND4,MT-CO1,MT-ND3,MT-ND5,MT-ND4L
3.15523e-07	0.393626	0.201	0.138	0.00624894	Gls	6		KEGG	Diabetic cardiomyopathy	KEGG:05415	FALSE	2.31014e-11	10.6364	205	29	12	9330	MT-ND1,MT-CO3,MT-ATP6,MT-CYTB,MT-ND2,MT-CO2,MT-ND4,MT-CO1,MT-ND3,MT-ND5,NFKB1,MT-ND4L
7.38128e-22	0.392604	0.578	0.621	1.46186e-17	Rpl19	6		KEGG	Chemical carcinogenesis - reactive oxygen species	KEGG:05208	FALSE	5.98777e-11	10.2227	222	29	12	9330	MT-ND1,MT-CO3,MT-ATP6,MT-CYTB,MT-ND2,MT-CO2,MT-ND4,MT-CO1,MT-ND3,MT-ND5,NFKB1,MT-ND4L
4.36934e-07	0.391865	0.221	0.183	0.00865347	Pik3c2a	6		KEGG	Prion disease	KEGG:05020	FALSE	5.11423e-10	9.29122	266	29	12	9330	MT-ND1,MT-CO3,MT-ATP6,MT-CYTB,MT-ND2,MT-CO2,MT-ND4,MT-CO1,MT-ND3,MT-ND5,C1QB,MT-ND4L
5.98247e-15	0.387531	0.35	0.398	1.18483e-10	Rlf	6		KEGG	Alzheimer disease	KEGG:05010	FALSE	1.80913e-09	8.74253	381	29	13	9330	MT-ND1,MT-CO3,MT-ATP6,MT-CYTB,MT-ND2,MT-CO2,MT-ND4,MT-CO1,MT-ND3,MT-ND5,APOE,NFKB1,MT-ND4L
3.46939e-09	0.38562	0.251	0.216	6.87112e-05	Smchd1	6		KEGG	Thermogenesis	KEGG:04714	FALSE	2.41973e-09	8.61623	229	29	11	9330	MT-ND1,MT-CO3,MT-ATP6,MT-CYTB,MT-ND2,MT-CO2,MT-ND4,MT-CO1,MT-ND3,MT-ND5,MT-ND4L
1.38882e-09	0.385463	0.357	0.265	2.75056e-05	Rpl5	6		KEGG	Parkinson disease	KEGG:05012	FALSE	1.07712e-08	7.96773	263	29	11	9330	MT-ND1,MT-CO3,MT-ATP6,MT-CYTB,MT-ND2,MT-CO2,MT-ND4,MT-CO1,MT-ND3,MT-ND5,MT-ND4L
5.31809e-08	0.383186	0.422	0.349	0.00105325	Ppia	6		KEGG	Huntington disease	KEGG:05016	FALSE	4.55828e-08	7.3412	301	29	11	9330	MT-ND1,MT-CO3,MT-ATP6,MT-CYTB,MT-ND2,MT-CO2,MT-ND4,MT-CO1,MT-ND3,MT-ND5,MT-ND4L
1.84417e-19	0.382541	0.712	0.712	3.65237e-15	Rplp1	6		KEGG	Amyotrophic lateral sclerosis	KEGG:05014	FALSE	3.70028e-07	6.43177	367	29	11	9330	MT-ND1,MT-CO3,MT-ATP6,MT-CYTB,MT-ND2,MT-CO2,MT-ND4,MT-CO1,MT-ND3,MT-ND5,MT-ND4L
2.05331e-08	0.380083	0.33	0.371	0.000406659	Arid5b	6		KEGG	Pathways of neurodegeneration - multiple diseases	KEGG:05022	FALSE	3.70698e-07	6.43098	470	29	12	9330	MT-ND1,MT-CO3,MT-ATP6,MT-CYTB,MT-ND2,MT-CO2,MT-ND4,MT-CO1,MT-ND3,MT-ND5,NFKB1,MT-ND4L
1.02509e-11	0.37987	0.548	0.529	2.0302e-07	Rpl8	6		KEGG	Coronavirus disease - COVID-19	KEGG:05171	FALSE	3.39558e-05	4.46909	243	29	8	9330	NFKB1,RPS18,RPL10A,C1QB,RPSA,RPS20,RPL32,RPS19
1.91894e-13	0.378767	0.538	0.506	3.80046e-09	Rpl38	6		KEGG	Retrograde endocannabinoid signaling	KEGG:04723	FALSE	0.000327396	3.48493	147	29	6	9330	MT-ND1,MT-ND2,MT-ND4,MT-ND3,MT-ND5,MT-ND4L
5.40757e-06	0.378764	0.117	0.058	0.107097	Gm34455	6		KEGG	Ribosome	KEGG:03010	FALSE	0.000756321	3.12129	170	29	6	9330	RPS18,RPL10A,RPSA,RPS20,RPL32,RPS19
1.46999e-19	0.378458	0.717	0.795	2.91132e-15	Rps24	6		KEGG	Non-alcoholic fatty liver disease	KEGG:04932	FALSE	0.00686892	2.16311	155	29	5	9330	MT-CO3,MT-CYTB,MT-CO2,MT-CO1,NFKB1
1.31216e-10	0.378218	0.337	0.328	2.59874e-06	Cd80	6		KEGG	Cardiac muscle contraction	KEGG:04260	FALSE	0.00943522	2.02525	87	29	4	9330	MT-CO3,MT-CYTB,MT-CO2,MT-CO1
6.80244e-11	0.377354	0.236	0.24	1.34722e-06	Fbxo11	6
1.05891e-08	0.37316	0.37	0.303	0.000209717	Ogt	6
5.76672e-12	0.372475	0.412	0.402	1.1421e-07	Hnrnpa3	6
2.67754e-11	0.371742	0.246	0.223	5.30286e-07	Tank	6
1.18833e-07	0.370993	0.365	0.281	0.00235349	Prrc2c	6
2.9657e-09	0.370672	0.241	0.16	5.87356e-05	Mycbp2	6
1.43969e-07	0.369797	0.32	0.236	0.0028513	Rps17	6
9.43905e-13	0.369617	0.504	0.527	1.8694e-08	Syk	6
2.238e-06	0.366547	0.164	0.13	0.0443236	Rc3h2	6
4.0927e-06	0.365302	0.208	0.143	0.081056	Rpl36al	6
2.13965e-06	0.364921	0.151	0.084	0.0423758	Stat2	6
5.01908e-14	0.363627	0.536	0.586	9.94029e-10	Csf2ra	6
1.03914e-13	0.36311	0.238	0.288	2.05802e-09	Larp4b	6
1.11073e-08	0.362751	0.206	0.173	0.00021998	Smg1	6
1.10725e-09	0.36182	0.144	0.058	2.1929e-05	Gpx3	6
2.75367e-06	0.358194	0.161	0.103	0.0545365	C1qc	6
5.19197e-07	0.35773	0.28	0.288	0.0102827	Dleu2	6
5.67819e-10	0.357328	0.236	0.181	1.12457e-05	H2-Eb1	6
1.0579e-06	0.357216	0.223	0.154	0.0209518	S100a10	6
5.92709e-12	0.356989	0.906	0.951	1.17386e-07	Lilrb4a	6
3.52221e-07	0.35568	0.293	0.314	0.00697573	Mapk6	6
2.29032e-15	0.355171	0.171	0.051	4.53598e-11	Mndal	6
8.05977e-07	0.354923	0.467	0.416	0.0159624	Rps28	6
5.62572e-11	0.353871	0.238	0.226	1.11417e-06	Trip12	6
1.62937e-14	0.353768	0.581	0.611	3.22697e-10	Rps11	6
2.90034e-10	0.352674	0.516	0.484	5.74412e-06	Hspa8	6
4.8938e-06	0.352105	0.34	0.261	0.0969217	Rpl14	6
2.92187e-09	0.351535	0.263	0.241	5.78677e-05	BC005537	6
1.19952e-06	0.351525	0.268	0.241	0.0237565	Slc22a15	6
2.0757e-06	0.351415	0.218	0.135	0.0411092	Nme2	6
1.36737e-05	0.349832	0.216	0.159	0.270809	Srsf2	6
2.97307e-09	0.349245	0.151	0.14	5.88817e-05	Fam13b	6
8.26821e-09	0.34884	0.531	0.589	0.000163752	Cflar	6
3.44616e-11	0.348673	0.581	0.578	6.82512e-07	Rpl39	6
0.00697055	0.348503	0.208	0.179	1	Rhoh	6
2.99151e-17	0.347426	0.583	0.606	5.92468e-13	Rpl21	6
1.60419e-07	0.346936	0.218	0.201	0.00317709	Arid5a	6
6.83084e-11	0.346609	0.66	0.685	1.35285e-06	Tut7	6
2.28554e-07	0.345271	0.377	0.32	0.0045265	Hnrnpu	6
6.44324e-06	0.344056	0.578	0.566	0.127608	Dennd4a	6
3.88751e-06	0.341367	0.149	0.084	0.0769921	Ly6a	6
1.73461e-11	0.341164	0.524	0.537	3.43539e-07	Clk1	6
1.04407e-06	0.339666	0.213	0.16	0.0206779	Ccl5	6
4.63495e-06	0.339325	0.372	0.317	0.0917951	Rpl22	6
8.33547e-09	0.338855	0.174	0.132	0.000165084	Thoc2	6
3.56405e-06	0.338579	0.37	0.347	0.070586	Aff4	6
1.26877e-11	0.337876	0.71	0.669	2.5128e-07	Picalm	6
8.00782e-08	0.333474	0.171	0.138	0.00158595	Epb41l2	6
6.25347e-18	0.333202	0.613	0.646	1.2385e-13	Rpl28	6
8.16994e-14	0.333082	0.521	0.543	1.61806e-09	Rps7	6
5.042e-09	0.332605	0.27	0.285	9.98568e-05	Noct	6
5.67284e-06	0.331692	0.335	0.345	0.112351	Erbin	6
7.1326e-07	0.331417	0.293	0.291	0.0141261	Ripor2	6
0.000191995	0.330477	0.199	0.154	1	Ccl7	6
3.66827e-07	0.329998	0.402	0.324	0.00726502	Jmjd1c	6
4.61443e-09	0.328467	0.166	0.073	9.13888e-05	Mbnl1	6
1.31055e-11	0.328347	0.548	0.537	2.59554e-07	Rpl13a	6
8.11377e-13	0.328045	0.543	0.539	1.60693e-08	Rps2	6
3.71757e-06	0.327255	0.203	0.129	0.0736264	Prpf38b	6
1.68717e-06	0.326817	0.283	0.228	0.0334144	Clec2d	6
5.05795e-09	0.326557	0.122	0.047	0.000100173	Maf	6
5.56019e-13	0.326487	0.546	0.558	1.10119e-08	Rps3a1	6
0.000819489	0.324793	0.159	0.101	1	Sltm	6
5.28124e-13	0.324711	0.558	0.63	1.04595e-08	Dusp16	6
3.64502e-07	0.32406	0.194	0.173	0.00721897	Rnf213	6
1.00099e-06	0.323146	0.263	0.281	0.0198247	Jak2	6
7.71375e-06	0.322933	0.174	0.14	0.152771	Stap1	6
1.27207e-07	0.322833	0.387	0.402	0.00251934	Baz2b	6
3.1244e-05	0.322514	0.122	0.109	0.618788	Golgb1	6
2.32798e-09	0.322276	0.231	0.273	4.61056e-05	Igf1r	6
1.26271e-09	0.32225	0.427	0.409	2.50081e-05	Rps5	6
0.00224127	0.321994	0.186	0.147	1	Hdac4	6
6.4501e-09	0.321232	0.275	0.316	0.000127744	Trim25	6
5.16949e-06	0.321032	0.258	0.243	0.102382	Il17ra	6
0.000287716	0.320035	0.186	0.144	1	Trps1	6
8.55294e-09	0.319651	0.355	0.324	0.000169391	Ybx1	6
2.85616e-07	0.319235	0.238	0.247	0.00565663	Ccdc88b	6
1.44156e-08	0.318301	0.29	0.268	0.0002855	Dock2	6
1.16106e-09	0.317244	0.233	0.232	2.29947e-05	Rbm5	6
3.55804e-05	0.314915	0.228	0.234	0.704669	Slc25a37	6
1.43319e-07	0.314406	0.278	0.277	0.00283844	Gripap1	6
1.4478e-10	0.313419	0.169	0.145	2.86738e-06	Uqcrb	6
5.35259e-08	0.312851	0.154	0.126	0.00106008	Myo9b	6
3.79791e-09	0.312316	0.365	0.387	7.52176e-05	Mir22hg	6
5.35373e-09	0.312059	0.414	0.412	0.000106031	Tcf25	6
0.010573	0.310952	0.161	0.152	1	Chka	6
5.14428e-06	0.310541	0.303	0.291	0.101882	Zfp292	6
1.72038e-06	0.310327	0.166	0.13	0.0340721	Vav3	6
1.78382e-08	0.309576	0.109	0.099	0.000353286	Setd5	6
3.28787e-12	0.30802	0.427	0.501	6.51163e-08	Mefv	6
1.5415e-05	0.306942	0.266	0.282	0.305294	Rb1cc1	6
8.43647e-09	0.306858	0.109	0.063	0.000167084	Ccdc88c	6
1.1778e-08	0.306195	0.365	0.382	0.000233263	Cyth4	6
7.98133e-07	0.304414	0.156	0.114	0.015807	Kmt5b	6
5.26417e-06	0.304263	0.129	0.08	0.104257	Lacc1	6
3.6788e-05	0.30403	0.233	0.201	0.728585	Fnip1	6
1.08236e-09	0.30349	0.62	0.656	2.14361e-05	Rel	6
3.1608e-09	0.302225	0.444	0.423	6.25996e-05	Stat3	6
0.000632025	0.301699	0.246	0.235	1	Fndc3a	6
0.000790031	0.301517	0.231	0.192	1	Runx1	6
1.15694e-09	0.300413	0.429	0.468	2.29132e-05	Tra2a	6
1.76496e-06	0.300355	0.397	0.367	0.0349549	Rps6	6
6.42491e-05	0.299353	0.107	0.082	1	Dbi	6
5.27478e-08	0.296776	0.221	0.214	0.00104467	Cdk12	6
5.22612e-11	0.295878	0.496	0.521	1.03503e-06	2024-03-07	6
0.00136321	0.294831	0.246	0.228	1	Zfp263	6
5.64436e-21	0.294713	0.141	0.027	1.11787e-16	mt-Atp8	6
2.94575e-16	0.294629	0.722	0.763	5.83406e-12	AY036118	6
0.00808563	0.29375	0.216	0.167	1	Kif5b	6
0.000132737	0.292648	0.72	0.697	1	Ptgs2	6
2.78715e-05	0.29035	0.164	0.128	0.551996	Git2	6
1.21427e-05	0.289959	0.164	0.118	0.240487	Zswim6	6
1.66951e-06	0.289831	0.146	0.104	0.0330646	Taf1	6
1.81743e-06	0.289826	0.132	0.067	0.0359941	Bod1l	6
1.14912e-10	0.289693	0.476	0.501	2.27584e-06	Rps26	6
5.08829e-06	0.289563	0.134	0.122	0.100774	Diaph2	6
2.43845e-06	0.289002	0.434	0.451	0.0482936	Ifnar1	6
0.00367118	0.288173	0.571	0.505	1	Fos	6
4.83002e-06	0.288018	0.156	0.115	0.0956585	Smad7	6
1.79306e-05	0.288004	0.139	0.098	0.355115	Ctsj	6
6.11131e-18	0.287831	0.722	0.772	1.21034e-13	Rpl17	6
1.10857e-08	0.287687	0.211	0.108	0.000219552	Arglu1	6
0.000150582	0.287578	0.295	0.281	1	Xdh	6
2.76709e-06	0.287496	0.36	0.344	0.0548023	Slc38a2	6
8.40844e-10	0.287233	0.29	0.351	1.66529e-05	Cpd	6
2.5447e-06	0.285907	0.32	0.328	0.0503977	Eea1	6
4.59512e-06	0.28467	0.189	0.14	0.0910064	Arhgap17	6
0.000885115	0.283419	0.141	0.092	1	Arl4c	6
7.67969e-05	0.282739	0.146	0.08	1	Slc38a1	6
4.23328e-10	0.281662	0.365	0.4	8.38402e-06	Pfkp	6
1.30898e-07	0.28117	0.129	0.142	0.00259243	Tpbpb	6
7.79567e-10	0.280645	0.526	0.545	1.54393e-05	Rpl27	6
4.31268e-11	0.280378	0.653	0.679	8.54125e-07	Kdm6b	6
8.35855e-06	0.279914	0.134	0.084	0.165541	Paxbp1	6
5.6295e-07	0.279786	0.151	0.071	0.0111492	Prpf39	6
2.77259e-08	0.279538	0.318	0.361	0.000549112	Gk	6
3.95227e-07	0.279495	0.459	0.507	0.00782747	Rnf149	6
2.20965e-11	0.279309	0.524	0.541	4.37622e-07	Rpl26	6
9.49524e-10	0.278821	0.104	0.033	1.88053e-05	Tcf4	6
8.45958e-07	0.278553	0.119	0.055	0.0167542	Ms4a6c	6
4.77565e-07	0.278284	0.439	0.418	0.00945817	Rps15	6
5.79405e-05	0.276223	0.233	0.157	1	Sfpq	6
0.000142311	0.275681	0.176	0.14	1	N4bp2l2	6
6.62792e-05	0.273812	0.159	0.092	1	Sparc	6
0.000892865	0.272728	0.293	0.249	1	Naca	6
2.47876e-05	0.272409	0.866	0.902	0.490918	Slc7a11	6
2.72209e-06	0.272207	0.39	0.344	0.0539111	Rpl7a	6
1.66587e-07	0.271785	0.218	0.209	0.00329925	Taok1	6
1.39315e-11	0.270735	0.603	0.661	2.75913e-07	Ptbp3	6
0.00100415	0.270548	0.122	0.1	1	P2rx4	6
5.30383e-07	0.270306	0.201	0.192	0.0105042	Fbxl3	6
3.7626e-10	0.27028	0.742	0.766	7.45182e-06	Eef1a1	6
0.0048065	0.269484	0.434	0.408	1	Akap13	6
0.000362458	0.26912	0.181	0.114	1	Eif3a	6
0.00556528	0.268568	0.357	0.31	1	Parp14	6
2.4961e-07	0.268111	0.675	0.695	0.00494352	Cst3	6
0.000231623	0.267905	0.136	0.083	1	Zcchc7	6
7.36653e-05	0.267427	0.139	0.104	1	Avl9	6
0.00152217	0.267233	0.211	0.175	1	Ppp1r10	6
3.12303e-05	0.266389	0.27	0.175	0.618516	Ifi207	6
2.98082e-10	0.266327	0.692	0.719	5.90351e-06	Sf3b1	6
1.41533e-12	0.265969	0.504	0.553	2.80305e-08	Rbms1	6
0.00456787	0.265431	0.156	0.107	1	Rps27l	6
6.2636e-07	0.265253	0.593	0.621	0.0124051	Skil	6
4.34567e-08	0.263135	0.454	0.491	0.000860661	Kmt2e	6
2.99798e-11	0.262966	0.538	0.595	5.9375e-07	Rpl24	6
0.000712362	0.262749	0.246	0.246	1	F630028O10Rik	6
6.22025e-16	0.262736	0.104	0.018	1.23192e-11	Gm47283	6
0.0330991	0.26257	0.258	0.225	1	Crlf3	6
2.32559e-05	0.262494	0.36	0.359	0.460583	Cyth1	6
1.72651e-06	0.261507	0.318	0.305	0.0341935	Rpl31	6
0.033983	0.261502	0.263	0.259	1	Cybb	6
1.32024e-06	0.261061	0.372	0.399	0.0261473	Tmcc1	6
9.10838e-07	0.261003	0.223	0.239	0.0180391	Il18rap	6
0.000481458	0.260914	0.166	0.119	1	Ash1l	6
7.06276e-05	0.25947	0.109	0.082	1	Mkln1	6
0.00167013	0.258682	0.541	0.533	1	Zfp36l1	6
0.0118999	0.25866	0.36	0.314	1	Lnpep	6
0.00012189	0.258621	0.266	0.236	1	Calr	6
1.30589e-08	0.258347	0.816	0.884	0.000258631	Resf1	6
7.66557e-06	0.258149	0.146	0.141	0.151817	Adam17	6
0.00621239	0.257913	0.258	0.205	1	Crebbp	6
0.000592644	0.257381	0.221	0.176	1	Rpl4	6
0.000168694	0.257286	0.129	0.13	1	Usp15	6
1.0082e-06	0.256709	0.424	0.397	0.0199675	Hsp90ab1	6
8.65843e-13	0.256454	0.705	0.755	1.7148e-08	Rpl35a	6
0.00178407	0.255808	0.305	0.274	1	Irf2bp2	6
0.000321192	0.255647	0.151	0.129	1	Lpin2	6
4.52117e-11	0.254466	0.811	0.847	8.95417e-07	Iqgap1	6
0.000115928	0.254004	0.382	0.35	1	Srsf11	6
5.58504e-11	0.253791	0.112	0.031	1.10612e-06	Mrc1	6
2.36387e-05	0.253061	0.303	0.336	0.468163	Npepps	6
0.00037626	0.252239	0.119	0.078	1	Ifi30	6
0.00018378	0.251917	0.146	0.084	1	Eif5b	6
1.56442e-07	0.251657	0.146	0.159	0.00309834	Slco3a1	6
0.000855638	0.251175	0.226	0.183	1	Rpl22l1	6
1.39829e-06	0.251131	0.169	0.17	0.0276932	Gm21188	6
1.83678e-14	0.251034	0.68	0.739	3.63774e-10	Rps14	6

## Sheet: 7
p_val	avg_logFC	pct.1	pct.2	p_val_adj	gene	cluster		source	term_name	term_id	highlighted	adjusted_p_value	negative_log10_of_adjusted_p_value	term_size	query_size	intersection_size	effective_domain_size	intersections
1.38174e-37	1.90594	0.759	0.355	2.73654e-33	Chil3	7		GO:MF	structural constituent of ribosome	GO:0003735	TRUE	4.03272e-39	38.3944	348	49	29	25063	RPLP2,RPS28,RPL36,RPS15,RPL22,RPL38,RPS29,RPS8,MRPL52,RPS19,RPL14,RPS17,RPL8,RPS26,RPLP1,RPL35A,RPSA,RPL11,RPS3,RPL5,RPS18,RPL32,RPS15A,RPL26,RPS21,RPL12,RPS25,RPL36AL,RPL21
3.46141e-22	1.8427	0.405	0.096	6.85533e-18	Il23a	7		GO:MF	structural molecule activity	GO:0005198	FALSE	9.56466e-27	26.0193	920	49	29	25063	RPLP2,RPS28,RPL36,RPS15,RPL22,RPL38,RPS29,RPS8,MRPL52,RPS19,RPL14,RPS17,RPL8,RPS26,RPLP1,RPL35A,RPSA,RPL11,RPS3,RPL5,RPS18,RPL32,RPS15A,RPL26,RPS21,RPL12,RPS25,RPL36AL,RPL21
5.10789e-13	1.7272	0.291	0.101	1.01162e-08	Cxcl1	7		GO:MF	rRNA binding	GO:0019843	TRUE	2.98791e-06	5.52463	74	49	6	25063	RPL8,RPL11,RPS3,RPL5,RPS18,RPL12
1.51323e-76	1.52435	0.962	0.631	2.99695e-72	Rplp2	7		GO:MF	ubiquitin ligase inhibitor activity	GO:1990948	TRUE	0.000256592	3.59076	9	49	3	25063	RPS15,RPL11,RPL5
9.54004e-60	1.49944	0.873	0.413	1.88941e-55	Rps28	7		GO:MF	ubiquitin-protein transferase inhibitor activity	GO:0055105	FALSE	0.000868836	3.06106	13	49	3	25063	RPS15,RPL11,RPL5
5.60781e-49	1.41987	0.848	0.317	1.11063e-44	Rpl36	7		GO:MF	ubiquitin-protein transferase regulator activity	GO:0055106	FALSE	0.0108587	1.96422	29	49	3	25063	RPS15,RPL11,RPL5
1.09526e-28	1.41476	0.797	0.561	2.16917e-24	Cdkn1a	7		GO:MF	ribonucleoprotein complex binding	GO:0043021	TRUE	0.0159323	1.79772	192	49	5	25063	RPLP2,RPLP1,RPSA,RPS21,SNRPG
1.94495e-56	1.40632	0.861	0.413	3.85197e-52	Rps15	7		GO:BP	cytoplasmic translation	GO:0002181	TRUE	5.52079e-50	49.258	158	49	29	26944	RPLP2,RPS28,RPL36,RPS15,RPL22,RPL38,RPS29,RPS8,RPS19,RPL14,RPS17,RPL8,RPS26,RPLP1,RPL35A,RPSA,RPL11,RPS3,RPL5,RPS18,CNBP,RPL32,RPS15A,RPL26,RPS21,RPL12,RPS25,RPL36AL,RPL21
2.34327e-49	1.37515	0.759	0.314	4.64084e-45	Rpl22	7		GO:BP	translation	GO:0006412	FALSE	1.24881e-33	32.9035	722	49	31	26944	RPLP2,RPS28,RPL36,RPS15,RPL22,RPL38,RPS29,RPS8,MRPL52,RPS19,RPL14,RPS17,RPL8,RPS26,RPLP1,TNF,RPL35A,RPSA,RPL11,RPS3,RPL5,RPS18,CNBP,RPL32,RPS15A,RPL26,RPS21,RPL12,RPS25,RPL36AL,RPL21
7.73528e-50	1.32307	0.937	0.501	1.53197e-45	Rpl38	7		GO:BP	peptide biosynthetic process	GO:0043043	FALSE	3.45998e-33	32.4609	746	49	31	26944	RPLP2,RPS28,RPL36,RPS15,RPL22,RPL38,RPS29,RPS8,MRPL52,RPS19,RPL14,RPS17,RPL8,RPS26,RPLP1,TNF,RPL35A,RPSA,RPL11,RPS3,RPL5,RPS18,CNBP,RPL32,RPS15A,RPL26,RPS21,RPL12,RPS25,RPL36AL,RPL21
2.58764e-43	1.30816	0.772	0.349	5.12482e-39	Ppia	7		GO:BP	amide biosynthetic process	GO:0043604	FALSE	3.81956e-31	30.418	868	49	31	26944	RPLP2,RPS28,RPL36,RPS15,RPL22,RPL38,RPS29,RPS8,MRPL52,RPS19,RPL14,RPS17,RPL8,RPS26,RPLP1,TNF,RPL35A,RPSA,RPL11,RPS3,RPL5,RPS18,CNBP,RPL32,RPS15A,RPL26,RPS21,RPL12,RPS25,RPL36AL,RPL21
1.27423e-62	1.30554	0.975	0.798	2.5236e-58	Rps29	7		GO:BP	peptide metabolic process	GO:0006518	FALSE	1.76383e-30	29.7535	912	49	31	26944	RPLP2,RPS28,RPL36,RPS15,RPL22,RPL38,RPS29,RPS8,MRPL52,RPS19,RPL14,RPS17,RPL8,RPS26,RPLP1,TNF,RPL35A,RPSA,RPL11,RPS3,RPL5,RPS18,CNBP,RPL32,RPS15A,RPL26,RPS21,RPL12,RPS25,RPL36AL,RPL21
1.9746e-50	1.29156	0.937	0.639	3.91069e-46	Rps8	7		GO:BP	translation at presynapse	GO:0140236	FALSE	3.80502e-27	26.4196	51	49	15	26944	RPLP2,RPS28,RPL36,RPL22,RPL38,RPL14,RPL8,RPS26,RPL35A,RPL5,RPL32,RPS15A,RPL26,RPL12,RPL36AL
9.10098e-27	1.29041	0.646	0.229	1.80245e-22	Mrpl52	7		GO:BP	translation at synapse	GO:0140241	FALSE	5.34126e-27	26.2724	52	49	15	26944	RPLP2,RPS28,RPL36,RPL22,RPL38,RPL14,RPL8,RPS26,RPL35A,RPL5,RPL32,RPS15A,RPL26,RPL12,RPL36AL
1.35709e-26	1.281	0.241	0.003	2.68771e-22	Bcl2l15	7		GO:BP	translation at postsynapse	GO:0140242	FALSE	5.34126e-27	26.2724	52	49	15	26944	RPLP2,RPS28,RPL36,RPL22,RPL38,RPL14,RPL8,RPS26,RPL35A,RPL5,RPL32,RPS15A,RPL26,RPL12,RPL36AL
1.34445e-41	1.26497	0.797	0.469	2.66267e-37	Rps19	7		GO:BP	amide metabolic process	GO:0043603	FALSE	5.69411e-27	26.2446	1186	49	31	26944	RPLP2,RPS28,RPL36,RPS15,RPL22,RPL38,RPS29,RPS8,MRPL52,RPS19,RPL14,RPS17,RPL8,RPS26,RPLP1,TNF,RPL35A,RPSA,RPL11,RPS3,RPL5,RPS18,CNBP,RPL32,RPS15A,RPL26,RPS21,RPL12,RPS25,RPL36AL,RPL21
2.7259e-35	1.26304	0.709	0.26	5.39865e-31	Rpl14	7		GO:BP	organonitrogen compound biosynthetic process	GO:1901566	FALSE	1.34162e-23	22.8724	1707	49	32	26944	IL23A,RPLP2,RPS28,RPL36,RPS15,RPL22,RPL38,RPS29,RPS8,MRPL52,RPS19,RPL14,RPS17,RPL8,RPS26,RPLP1,TNF,RPL35A,RPSA,RPL11,RPS3,RPL5,RPS18,CNBP,RPL32,RPS15A,RPL26,RPS21,RPL12,RPS25,RPL36AL,RPL21
1.1925e-26	1.24744	0.43	0.065	2.36174e-22	Klhl6	7		GO:BP	cellular nitrogen compound biosynthetic process	GO:0044271	FALSE	5.84294e-18	17.2334	4715	49	39	26944	IL23A,RPLP2,RPS28,RPL36,CDKN1A,RPS15,RPL22,RPL38,PPIA,RPS29,RPS8,MRPL52,RPS19,RPL14,RPS17,RPL8,RPS26,RPLP1,DYNLL1,TNF,RPL35A,RPSA,RPL11,EGR1,RPS3,RPL5,PTMA,RPS18,CNBP,RPL32,RPS15A,RPL26,RPS21,CREB5,RPL12,RPS25,RPL36AL,RPL21,FOS
3.34192e-39	1.24262	0.785	0.234	6.61867e-35	Rps17	7		GO:BP	protein metabolic process	GO:0019538	FALSE	1.81294e-14	13.7416	4698	49	36	26944	IL23A,RPLP2,RPS28,RPL36,CDKN1A,RPS15,RPL22,RPL38,PPIA,RPS29,RPS8,MRPL52,RPS19,RPL14,RPS17,RPL8,RPS26,RPLP1,TNF,RPL35A,RPSA,RPL11,EGR1,RPS3,RPL5,RPS18,CNBP,RPL32,RPS15A,RPL26,DUSP2,RPS21,RPL12,RPS25,RPL36AL,RPL21
2.61686e-52	1.23177	0.873	0.525	5.18268e-48	Rpl8	7		GO:BP	ribosome biogenesis	GO:0042254	TRUE	1.87922e-14	13.726	321	49	15	26944	RPS28,RPS15,RPL38,RPS8,RPS19,RPL14,RPS17,RPL35A,RPSA,RPL11,RPL5,RPS15A,RPL26,RPS21,RPS25
1.02675e-48	1.22903	0.899	0.493	2.03347e-44	Rps26	7		GO:BP	organonitrogen compound metabolic process	GO:1901564	FALSE	1.32218e-12	11.8787	5744	49	37	26944	CHIL3,IL23A,RPLP2,RPS28,RPL36,CDKN1A,RPS15,RPL22,RPL38,PPIA,RPS29,RPS8,MRPL52,RPS19,RPL14,RPS17,RPL8,RPS26,RPLP1,TNF,RPL35A,RPSA,RPL11,EGR1,RPS3,RPL5,RPS18,CNBP,RPL32,RPS15A,RPL26,DUSP2,RPS21,RPL12,RPS25,RPL36AL,RPL21
8.173e-08	1.20421	0.215	0.106	0.00161866	Rgs1	7		GO:BP	rRNA processing	GO:0006364	FALSE	5.67619e-12	11.2459	214	49	12	26944	RPS28,RPS15,RPS8,RPS19,RPL14,RPS17,RPL35A,RPL11,RPL5,RPL26,RPS21,RPS25
1.36035e-49	1.19433	0.899	0.709	2.69418e-45	Rplp1	7		GO:BP	rRNA metabolic process	GO:0016072	FALSE	3.66749e-11	10.4356	250	49	12	26944	RPS28,RPS15,RPS8,RPS19,RPL14,RPS17,RPL35A,RPL11,RPL5,RPL26,RPS21,RPS25
1.13332e-25	1.17728	0.608	0.207	2.24453e-21	Dynll1	7		GO:BP	ribosomal small subunit biogenesis	GO:0042274	FALSE	3.17515e-10	9.49824	101	49	9	26944	RPS28,RPS15,RPS8,RPS19,RPS17,RPSA,RPS15A,RPS21,RPS25
4.7163e-14	1.17553	0.582	0.388	9.34063e-10	Tnf	7		GO:BP	ncRNA metabolic process	GO:0034660	FALSE	4.52451e-10	9.34443	638	49	15	26944	RPS28,RPS15,RPS8,RPS19,RPL14,RPS17,TNF,RPL35A,RPL11,EGR1,RPL5,RPL26,RPS21,RPS25,FOS
2.85716e-53	1.14768	0.937	0.748	5.65861e-49	Rpl35a	7		GO:BP	ribosome assembly	GO:0042255	FALSE	8.69759e-10	9.0606	69	49	8	26944	RPS28,RPS15,RPL38,RPS19,RPSA,RPL11,RPL5,RPS25
1.34497e-32	1.14115	0.747	0.392	2.66372e-28	Rpsa	7		GO:BP	gene expression	GO:0010467	FALSE	4.79283e-09	8.31941	9403	49	41	26944	CHIL3,IL23A,RPLP2,RPS28,RPL36,CDKN1A,RPS15,RPL22,RPL38,PPIA,RPS29,RPS8,MRPL52,RPS19,RPL14,RPS17,RPL8,RPS26,RPLP1,TNF,RPL35A,RPSA,RPL11,EGR1,HILPDA,RPS3,RPL5,PTMA,RPS18,CNBP,RPL32,RPS15A,RPL26,RPS21,SNRPG,CREB5,RPL12,RPS25,RPL36AL,RPL21,FOS
1.59189e-39	1.14006	0.861	0.476	3.15273e-35	Rpl11	7		GO:BP	cellular nitrogen compound metabolic process	GO:0034641	FALSE	6.15051e-09	8.21109	8912	49	40	26944	IL23A,RPLP2,RPS28,RPL36,CDKN1A,RPS15,RPL22,RPL38,PPIA,RPS29,RPS8,MRPL52,RPS19,RPL14,RPS17,RPL8,RPS26,RPLP1,DYNLL1,TNF,RPL35A,RPSA,RPL11,EGR1,RPS3,RPL5,PTMA,RPS18,CNBP,RPL32,RPS15A,RPL26,RPS21,SNRPG,CREB5,RPL12,RPS25,RPL36AL,RPL21,FOS
1.94845e-07	1.13206	0.43	0.263	0.0038589	Gm12840	7		GO:BP	ncRNA processing	GO:0034470	FALSE	2.70819e-08	7.56732	438	49	12	26944	RPS28,RPS15,RPS8,RPS19,RPL14,RPS17,RPL35A,RPL11,RPL5,RPL26,RPS21,RPS25
6.49699e-14	1.12349	0.608	0.338	1.28673e-09	Egr1	7		GO:BP	macromolecule biosynthetic process	GO:0009059	FALSE	2.83279e-08	7.54779	9868	49	41	26944	CHIL3,IL23A,RPLP2,RPS28,RPL36,CDKN1A,RPS15,RPL22,RPL38,PPIA,RPS29,RPS8,MRPL52,RPS19,RPL14,RPS17,RPL8,RPS26,RPLP1,TNF,RPL35A,RPSA,RPL11,EGR1,HILPDA,RPS3,RPL5,PTMA,RPS18,CNBP,RPL32,RPS15A,RPL26,RPS21,SNRPG,CREB5,RPL12,RPS25,RPL36AL,RPL21,FOS
1.53313e-19	1.12297	0.81	0.66	3.03635e-15	Hilpda	7		GO:BP	cellular biosynthetic process	GO:0044249	FALSE	6.98846e-08	7.15562	10717	49	42	26944	CHIL3,IL23A,RPLP2,RPS28,RPL36,CDKN1A,RPS15,RPL22,RPL38,PPIA,RPS29,RPS8,MRPL52,RPS19,RPL14,RPS17,RPL8,RPS26,RPLP1,DYNLL1,TNF,RPL35A,RPSA,RPL11,EGR1,HILPDA,RPS3,RPL5,PTMA,RPS18,CNBP,RPL32,RPS15A,RPL26,RPS21,SNRPG,CREB5,RPL12,RPS25,RPL36AL,RPL21,FOS
1.21083e-18	1.11282	0.481	0.113	2.39805e-14	Gngt2	7		GO:BP	biosynthetic process	GO:0009058	FALSE	1.13847e-07	6.94368	10857	49	42	26944	CHIL3,IL23A,RPLP2,RPS28,RPL36,CDKN1A,RPS15,RPL22,RPL38,PPIA,RPS29,RPS8,MRPL52,RPS19,RPL14,RPS17,RPL8,RPS26,RPLP1,DYNLL1,TNF,RPL35A,RPSA,RPL11,EGR1,HILPDA,RPS3,RPL5,PTMA,RPS18,CNBP,RPL32,RPS15A,RPL26,RPS21,SNRPG,CREB5,RPL12,RPS25,RPL36AL,RPL21,FOS
1.44974e-44	1.11057	0.861	0.557	2.87121e-40	Rps3	7		GO:BP	ribosomal small subunit assembly	GO:0000028	FALSE	4.22182e-07	6.3745	20	49	5	26944	RPS28,RPS15,RPS19,RPSA,RPS25
2.98962e-30	1.10969	0.684	0.266	5.92094e-26	Rpl5	7		GO:BP	organic substance biosynthetic process	GO:1901576	FALSE	7.35841e-07	6.13322	10794	49	41	26944	CHIL3,IL23A,RPLP2,RPS28,RPL36,CDKN1A,RPS15,RPL22,RPL38,PPIA,RPS29,RPS8,MRPL52,RPS19,RPL14,RPS17,RPL8,RPS26,RPLP1,TNF,RPL35A,RPSA,RPL11,EGR1,HILPDA,RPS3,RPL5,PTMA,RPS18,CNBP,RPL32,RPS15A,RPL26,RPS21,SNRPG,CREB5,RPL12,RPS25,RPL36AL,RPL21,FOS
5.49854e-22	1.10609	0.671	0.306	1.08899e-17	Ptma	7		GO:BP	cellular metabolic process	GO:0044237	FALSE	1.36304e-06	5.86549	12956	49	44	26944	CHIL3,IL23A,CXCL1,RPLP2,RPS28,RPL36,CDKN1A,RPS15,RPL22,RPL38,PPIA,RPS29,RPS8,MRPL52,RPS19,RPL14,RPS17,RPL8,RPS26,RPLP1,DYNLL1,TNF,RPL35A,RPSA,RPL11,EGR1,HILPDA,RPS3,RPL5,PTMA,RPS18,CNBP,RPL32,RPS15A,RPL26,DUSP2,RPS21,SNRPG,CREB5,RPL12,RPS25,RPL36AL,RPL21,FOS
1.30549e-26	1.09337	0.696	0.315	2.58553e-22	Rps18	7		GO:BP	non-membrane-bounded organelle assembly	GO:0140694	FALSE	3.9327e-06	5.40531	400	49	10	26944	RPS28,RPS15,RPL38,RPS19,TNF,RPSA,RPL11,RPS3,RPL5,RPS25
2.6399e-25	1.09262	0.544	0.169	5.22833e-21	Cnbp	7		GO:BP	nitrogen compound metabolic process	GO:0006807	FALSE	7.2388e-06	5.14033	12143	49	42	26944	CHIL3,IL23A,RPLP2,RPS28,RPL36,CDKN1A,RPS15,RPL22,RPL38,PPIA,RPS29,RPS8,MRPL52,RPS19,RPL14,RPS17,RPL8,RPS26,RPLP1,DYNLL1,TNF,RPL35A,RPSA,RPL11,EGR1,RPS3,RPL5,PTMA,RPS18,CNBP,RPL32,RPS15A,RPL26,DUSP2,RPS21,SNRPG,CREB5,RPL12,RPS25,RPL36AL,RPL21,FOS
7.48502e-33	1.09142	0.772	0.495	1.48241e-28	Rpl32	7		GO:BP	macromolecule metabolic process	GO:0043170	FALSE	1.11027e-05	4.95457	12286	49	42	26944	CHIL3,IL23A,RPLP2,RPS28,RPL36,CDKN1A,RPS15,RPL22,RPL38,PPIA,RPS29,RPS8,MRPL52,RPS19,RPL14,RPS17,RPL8,RPS26,RPLP1,TNF,RPL35A,RPSA,RPL11,EGR1,HILPDA,RPS3,RPL5,PTMA,RPS18,CNBP,RPL32,RPS15A,RPL26,DUSP2,RPS21,SNRPG,CREB5,RPL12,RPS25,RPL36AL,RPL21,FOS
8.7311e-36	1.08376	0.873	0.557	1.7292e-31	Rps15a	7		GO:BP	ribonucleoprotein complex biogenesis	GO:0022613	FALSE	1.77458e-05	4.7509	1588	49	16	26944	RPS28,RPS15,RPL38,RPS8,RPS19,RPL14,RPS17,RPL35A,RPSA,RPL11,RPL5,RPS15A,RPL26,RPS21,SNRPG,RPS25
9.7892e-36	1.08108	0.873	0.534	1.93875e-31	Rpl26	7		GO:BP	metabolic process	GO:0008152	FALSE	7.75658e-05	4.11033	14364	49	44	26944	CHIL3,IL23A,CXCL1,RPLP2,RPS28,RPL36,CDKN1A,RPS15,RPL22,RPL38,PPIA,RPS29,RPS8,MRPL52,RPS19,RPL14,RPS17,RPL8,RPS26,RPLP1,DYNLL1,TNF,RPL35A,RPSA,RPL11,EGR1,HILPDA,RPS3,RPL5,PTMA,RPS18,CNBP,RPL32,RPS15A,RPL26,DUSP2,RPS21,SNRPG,CREB5,RPL12,RPS25,RPL36AL,RPL21,FOS
5.51812e-37	1.08017	0.975	0.885	1.09286e-32	Rps27	7		GO:BP	primary metabolic process	GO:0044238	FALSE	0.000241494	3.61709	12727	49	41	26944	CHIL3,IL23A,RPLP2,RPS28,RPL36,CDKN1A,RPS15,RPL22,RPL38,PPIA,RPS29,RPS8,MRPL52,RPS19,RPL14,RPS17,RPL8,RPS26,RPLP1,TNF,RPL35A,RPSA,RPL11,EGR1,RPS3,RPL5,PTMA,RPS18,CNBP,RPL32,RPS15A,RPL26,DUSP2,RPS21,SNRPG,CREB5,RPL12,RPS25,RPL36AL,RPL21,FOS
9.26802e-13	1.07351	0.506	0.208	1.83553e-08	Dusp2	7		GO:BP	ribosomal large subunit biogenesis	GO:0042273	FALSE	0.000407555	3.38981	74	49	5	26944	RPL14,RPL35A,RPL11,RPL5,RPL26
1.33853e-38	1.06981	0.835	0.624	2.65095e-34	Rps21	7		GO:BP	organic substance metabolic process	GO:0071704	FALSE	0.00102158	2.99073	13942	49	42	26944	CHIL3,IL23A,RPLP2,RPS28,RPL36,CDKN1A,RPS15,RPL22,RPL38,PPIA,RPS29,RPS8,MRPL52,RPS19,RPL14,RPS17,RPL8,RPS26,RPLP1,TNF,RPL35A,RPSA,RPL11,EGR1,HILPDA,RPS3,RPL5,PTMA,RPS18,CNBP,RPL32,RPS15A,RPL26,DUSP2,RPS21,SNRPG,CREB5,RPL12,RPS25,RPL36AL,RPL21,FOS
6.84572e-31	1.0694	0.57	0.079	1.35579e-26	Snrpg	7		GO:BP	organelle assembly	GO:0070925	FALSE	0.00197083	2.70535	980	49	11	26944	RPS28,RPS15,RPL38,RPS19,DYNLL1,TNF,RPSA,RPL11,RPS3,RPL5,RPS25
1.29659e-22	1.06032	0.418	0.055	2.5679e-18	Creb5	7		GO:BP	maturation of SSU-rRNA	GO:0030490	FALSE	0.00214111	2.66936	44	49	4	26944	RPS28,RPS8,RPS19,RPS21
2.97942e-24	1.05103	0.608	0.278	5.90074e-20	Rpl12	7		GO:BP	regulation of translation	GO:0006417	FALSE	0.00692267	2.15973	363	49	7	26944	RPL38,RPLP1,TNF,RPS3,RPL5,CNBP,RPL26
4.60936e-38	1.03449	0.899	0.647	9.12885e-34	Rps25	7		GO:BP	signal transduction by p53 class mediator	GO:0072331	TRUE	0.0130648	1.8839	149	49	5	26944	CDKN1A,RPS15,RPL11,RPL5,RPL26
1.44746e-22	1.03104	0.506	0.142	2.86669e-18	Rpl36al	7		GO:BP	regulation of amide metabolic process	GO:0034248	FALSE	0.0196361	1.70694	426	49	7	26944	RPL38,RPLP1,TNF,RPS3,RPL5,CNBP,RPL26
7.05592e-35	1.02563	0.873	0.6	1.39742e-30	Rpl21	7		GO:BP	regulation of signal transduction by p53 class mediator	GO:1901796	FALSE	0.0275129	1.56046	83	49	4	26944	RPS15,RPL11,RPL5,RPL26
5.14871e-13	1.02554	0.684	0.507	1.0197e-08	Fos	7		GO:BP	negative regulation of protein modification by small protein conjugation or removal	GO:1903321	TRUE	0.0275129	1.56046	83	49	4	26944	PPIA,RPL11,RPS3,RPL5
5.24773e-31	1.02243	0.848	0.567	1.03931e-26	Rpl18	7		GO:BP	cellular response to gamma radiation	GO:0071480	TRUE	0.0276406	1.55845	27	49	3	26944	CDKN1A,EGR1,RPL26
1.85212e-09	1.01978	0.367	0.166	3.66812e-05	Clec4n	7		GO:BP	negative regulation of post-translational protein modification	GO:1901874	FALSE	0.0331488	1.47953	87	49	4	26944	PPIA,RPL11,RPS3,RPL5
4.76364e-21	1.01875	0.468	0.103	9.43438e-17	Snrpb	7		GO:BP	maturation of SSU-rRNA from tricistronic rRNA transcript (SSU-rRNA, 5.8S rRNA, LSU-rRNA)	GO:0000462	FALSE	0.0344413	1.46292	29	49	3	26944	RPS8,RPS19,RPS21
1.38953e-27	1.00373	0.696	0.485	2.75197e-23	Rpl6	7		GO:BP	intrinsic apoptotic signaling pathway	GO:0097193	TRUE	0.0384512	1.41509	315	49	6	26944	CDKN1A,PPIA,TNF,RPL11,RPS3,RPL26
9.66888e-31	1.00212	0.785	0.553	1.91492e-26	Rps3a1	7		GO:BP	positive regulation of signal transduction by p53 class mediator	GO:1901798	FALSE	0.0422599	1.37407	31	49	3	26944	RPS15,RPL11,RPL26
3.14177e-33	0.99175	0.911	0.613	6.22228e-29	Rpl19	7		GO:CC	cytosolic ribosome	GO:0022626	TRUE	2.08127e-51	50.6817	130	48	28	26995	RPLP2,RPS28,RPL36,RPS15,RPL22,RPL38,RPS29,RPS8,RPS19,RPL14,RPS17,RPL8,RPS26,RPLP1,RPL35A,RPSA,RPL11,RPS3,RPL5,RPS18,RPL32,RPS15A,RPL26,RPS21,RPL12,RPS25,RPL36AL,RPL21
4.91131e-25	0.989492	0.658	0.287	9.72684e-21	Arpp19	7		GO:CC	ribosomal subunit	GO:0044391	FALSE	6.55973e-48	47.1831	202	48	29	26995	RPLP2,RPS28,RPL36,RPS15,RPL22,RPL38,RPS29,RPS8,MRPL52,RPS19,RPL14,RPS17,RPL8,RPS26,RPLP1,RPL35A,RPSA,RPL11,RPS3,RPL5,RPS18,RPL32,RPS15A,RPL26,RPS21,RPL12,RPS25,RPL36AL,RPL21
1.21871e-32	0.980226	0.873	0.716	2.41366e-28	Rpl30	7		GO:CC	ribosome	GO:0005840	FALSE	2.87231e-38	37.5418	420	48	29	26995	RPLP2,RPS28,RPL36,RPS15,RPL22,RPL38,RPS29,RPS8,MRPL52,RPS19,RPL14,RPS17,RPL8,RPS26,RPLP1,RPL35A,RPSA,RPL11,RPS3,RPL5,RPS18,RPL32,RPS15A,RPL26,RPS21,RPL12,RPS25,RPL36AL,RPL21
1.14332e-37	0.979871	0.962	0.872	2.26435e-33	Rpl41	7		GO:CC	cytosolic large ribosomal subunit	GO:0022625	FALSE	3.70757e-26	25.4309	67	48	15	26995	RPLP2,RPL36,RPL22,RPL38,RPL14,RPL8,RPLP1,RPL35A,RPL11,RPL5,RPL32,RPL26,RPL12,RPL36AL,RPL21
1.60006e-31	0.974127	0.582	0.361	3.16892e-27	Cox7a2	7		GO:CC	cytosolic small ribosomal subunit	GO:0022627	FALSE	4.8911e-24	23.3106	45	48	13	26995	RPS28,RPS15,RPS29,RPS8,RPS19,RPS17,RPS26,RPSA,RPS3,RPS18,RPS15A,RPS21,RPS25
8.25961e-27	0.973944	0.709	0.406	1.63581e-22	Rps5	7		GO:CC	large ribosomal subunit	GO:0015934	FALSE	1.00425e-23	22.9982	127	48	16	26995	RPLP2,RPL36,RPL22,RPL38,MRPL52,RPL14,RPL8,RPLP1,RPL35A,RPL11,RPL5,RPL32,RPL26,RPL12,RPL36AL,RPL21
9.56104e-16	0.97273	0.899	0.696	1.89356e-11	Ptgs2	7		GO:CC	postsynapse	GO:0098794	FALSE	2.22439e-21	20.6528	847	48	24	26995	RPLP2,RPS28,RPL36,RPL22,RPL38,RPS19,RPL14,RPS17,RPL8,RPS26,RPLP1,RPL35A,RPSA,RPS3,RPL5,RPS18,RPL32,RPS15A,RPL26,RPS21,RPL12,RPS25,RPL36AL,RPL21
4.50485e-29	0.961911	0.785	0.445	8.92185e-25	Cox6b1	7		GO:CC	small ribosomal subunit	GO:0015935	FALSE	2.40797e-20	19.6183	81	48	13	26995	RPS28,RPS15,RPS29,RPS8,RPS19,RPS17,RPS26,RPSA,RPS3,RPS18,RPS15A,RPS21,RPS25
3.83955e-08	0.939643	0.203	0.04	0.000760424	Tnfsf9	7		GO:CC	cytosol	GO:0005829	FALSE	4.35423e-19	18.3611	4105	48	37	26995	RPLP2,RPS28,RPL36,CDKN1A,RPS15,RPL22,RPL38,PPIA,RPS29,RPS8,BCL2L15,RPS19,RPL14,RPS17,RPL8,RPS26,RGS1,RPLP1,DYNLL1,RPL35A,RPSA,RPL11,RPS3,RPL5,PTMA,RPS18,CNBP,RPL32,RPS15A,RPL26,RPS21,SNRPG,RPL12,RPS25,RPL36AL,RPL21,FOS
1.46598e-28	0.938567	0.62	0.275	2.90337e-24	Tomm6	7		GO:CC	ribonucleoprotein complex	GO:1990904	FALSE	2.22256e-18	17.6531	2289	48	30	26995	RPLP2,RPS28,RPL36,RPS15,RPL22,RPL38,RPS29,RPS8,MRPL52,RPS19,RPL14,RPS17,RPL8,RPS26,RPLP1,RPL35A,RPSA,RPL11,RPS3,RPL5,RPS18,RPL32,RPS15A,RPL26,RPS21,SNRPG,RPL12,RPS25,RPL36AL,RPL21
1.23087e-30	0.935574	0.886	0.673	2.43773e-26	Rpl13	7		GO:CC	synapse	GO:0045202	FALSE	3.44451e-17	16.4629	1641	48	26	26995	RPLP2,RPS28,RPL36,RPS15,RPL22,RPL38,RPS19,RPL14,RPS17,RPL8,RPS26,RPLP1,RPL35A,RPSA,RPL11,RPS3,RPL5,RPS18,RPL32,RPS15A,RPL26,RPS21,RPL12,RPS25,RPL36AL,RPL21
9.81859e-23	0.926886	0.658	0.364	1.94457e-18	Rpl15	7		GO:CC	cell junction	GO:0030054	FALSE	8.88348e-14	13.0514	2260	48	26	26995	RPLP2,RPS28,RPL36,RPS15,RPL22,RPL38,RPS19,RPL14,RPS17,RPL8,RPS26,RPLP1,RPL35A,RPSA,RPL11,RPS3,RPL5,RPS18,RPL32,RPS15A,RPL26,RPS21,RPL12,RPS25,RPL36AL,RPL21
4.07619e-27	0.92657	0.646	0.258	8.0729e-23	Cox6a1	7		GO:CC	protein-containing complex	GO:0032991	FALSE	2.98946e-10	9.52441	7427	48	37	26995	IL23A,RPLP2,RPS28,RPL36,CDKN1A,RPS15,RPL22,RPL38,PPIA,RPS29,RPS8,MRPL52,RPS19,RPL14,RPS17,RPL8,RPS26,RPLP1,DYNLL1,RPL35A,RPSA,RPL11,EGR1,GNGT2,RPS3,RPL5,RPS18,RPL32,RPS15A,RPL26,RPS21,SNRPG,RPL12,RPS25,RPL36AL,RPL21,FOS
1.87099e-13	0.926499	0.316	0.086	3.7055e-09	Eif5b	7		GO:CC	presynapse	GO:0098793	FALSE	4.38872e-10	9.35766	751	48	15	26995	RPLP2,RPS28,RPL36,RPL22,RPL38,RPL14,RPL8,RPS26,RPL35A,RPL5,RPL32,RPS15A,RPL26,RPL12,RPL36AL
6.27996e-15	0.923433	0.392	0.124	1.24375e-10	Hist1h4i	7		GO:CC	intracellular non-membrane-bounded organelle	GO:0043232	FALSE	3.14737e-09	8.50205	6555	48	34	26995	RPLP2,RPS28,RPL36,CDKN1A,RPS15,RPL22,RPL38,RPS29,RPS8,MRPL52,RPS19,RPL14,RPS17,RPL8,RPS26,RPLP1,DYNLL1,RPL35A,RPSA,RPL11,EGR1,HILPDA,RPS3,RPL5,RPS18,RPL32,RPS15A,RPL26,RPS21,SNRPG,RPL12,RPS25,RPL36AL,RPL21
7.99873e-13	0.920058	0.911	0.805	1.58415e-08	Ccrl2	7		GO:CC	non-membrane-bounded organelle	GO:0043228	FALSE	3.1617e-09	8.50008	6556	48	34	26995	RPLP2,RPS28,RPL36,CDKN1A,RPS15,RPL22,RPL38,RPS29,RPS8,MRPL52,RPS19,RPL14,RPS17,RPL8,RPS26,RPLP1,DYNLL1,RPL35A,RPSA,RPL11,EGR1,HILPDA,RPS3,RPL5,RPS18,RPL32,RPS15A,RPL26,RPS21,SNRPG,RPL12,RPS25,RPL36AL,RPL21
1.09798e-24	0.918681	0.582	0.325	2.17456e-20	Tomm7	7		GO:CC	cytoplasm	GO:0005737	FALSE	3.74425e-09	8.42664	11561	48	43	26995	CHIL3,RPLP2,RPS28,RPL36,CDKN1A,RPS15,RPL22,RPL38,PPIA,RPS29,RPS8,MRPL52,BCL2L15,RPS19,RPL14,RPS17,RPL8,RPS26,RGS1,RPLP1,DYNLL1,TNF,RPL35A,RPSA,RPL11,EGR1,HILPDA,RPS3,RPL5,PTMA,RPS18,CNBP,RPL32,RPS15A,RPL26,DUSP2,RPS21,SNRPG,RPL12,RPS25,RPL36AL,RPL21,FOS
2.6352e-18	0.916981	0.418	0.083	5.21901e-14	Anp32b	7		GO:CC	postsynaptic density	GO:0014069	FALSE	4.66032e-06	5.33158	379	48	9	26995	RPL38,RPS19,RPL14,RPL8,RPS3,RPL5,RPS18,RPL12,RPS25
1.53642e-19	0.91544	0.671	0.349	3.04287e-15	Atp5md	7		GO:CC	asymmetric synapse	GO:0032279	FALSE	7.40355e-06	5.13056	400	48	9	26995	RPL38,RPS19,RPL14,RPL8,RPS3,RPL5,RPS18,RPL12,RPS25
3.09641e-18	0.906917	0.468	0.105	6.13244e-14	Rps27l	7		GO:CC	postsynaptic specialization	GO:0099572	FALSE	1.29382e-05	4.88813	427	48	9	26995	RPL38,RPS19,RPL14,RPL8,RPS3,RPL5,RPS18,RPL12,RPS25
4.01292e-26	0.901901	0.696	0.484	7.94758e-22	Rpl23a	7		GO:CC	neuron to neuron synapse	GO:0098984	FALSE	1.57581e-05	4.8025	437	48	9	26995	RPL38,RPS19,RPL14,RPL8,RPS3,RPL5,RPS18,RPL12,RPS25
1.8387e-35	0.894435	0.937	0.86	3.64155e-31	Rps16	7		GO:CC	rough endoplasmic reticulum	GO:0005791	FALSE	2.0098e-05	4.69685	62	48	5	26995	CHIL3,RPS28,RPS29,RPS26,RPS21
7.33251e-21	0.894177	0.43	0.075	1.4522e-16	Snrpe	7		GO:CC	cytoplasmic side of rough endoplasmic reticulum membrane	GO:0098556	FALSE	2.45613e-05	4.60975	6	48	3	26995	RPS28,RPS29,RPS26
1.02215e-30	0.894066	0.899	0.729	2.02437e-26	Rpl27a	7		GO:CC	small-subunit processome	GO:0032040	FALSE	4.59744e-05	4.33748	73	48	5	26995	RPS28,RPS8,RPS19,RPS17,RPS15A
7.98156e-21	0.893583	0.519	0.245	1.58075e-16	Ndufa13	7		GO:CC	preribosome	GO:0030684	FALSE	0.000296888	3.52741	106	48	5	26995	RPS28,RPS8,RPS19,RPS17,RPS15A
7.37421e-20	0.893332	0.722	0.504	1.46046e-15	Rps20	7		GO:CC	intracellular organelle	GO:0043229	FALSE	0.000615783	3.21057	15836	48	43	26995	CHIL3,RPLP2,RPS28,RPL36,CDKN1A,RPS15,RPL22,RPL38,PPIA,RPS29,RPS8,MRPL52,BCL2L15,RPS19,RPL14,RPS17,RPL8,RPS26,RPLP1,DYNLL1,TNF,RPL35A,RPSA,RPL11,EGR1,HILPDA,RPS3,RPL5,PTMA,RPS18,CNBP,RPL32,RPS15A,RPL26,DUSP2,RPS21,SNRPG,CREB5,RPL12,RPS25,RPL36AL,RPL21,FOS
3.86133e-23	0.888033	0.848	0.534	7.64736e-19	Rps2	7		GO:CC	cytoplasmic side of endoplasmic reticulum membrane	GO:0098554	FALSE	0.000679169	3.16802	16	48	3	26995	RPS28,RPS29,RPS26
1.57955e-13	0.884048	0.696	0.553	3.12829e-09	Mif	7		GO:CC	organelle	GO:0043226	FALSE	0.00130848	2.88323	16169	48	43	26995	CHIL3,RPLP2,RPS28,RPL36,CDKN1A,RPS15,RPL22,RPL38,PPIA,RPS29,RPS8,MRPL52,BCL2L15,RPS19,RPL14,RPS17,RPL8,RPS26,RPLP1,DYNLL1,TNF,RPL35A,RPSA,RPL11,EGR1,HILPDA,RPS3,RPL5,PTMA,RPS18,CNBP,RPL32,RPS15A,RPL26,DUSP2,RPS21,SNRPG,CREB5,RPL12,RPS25,RPL36AL,RPL21,FOS
4.25173e-29	0.875279	0.899	0.732	8.42055e-25	Rps14	7		GO:CC	rough endoplasmic reticulum membrane	GO:0030867	FALSE	0.00349901	2.45606	27	48	3	26995	RPS28,RPS29,RPS26
4.8898e-22	0.874272	0.684	0.365	9.68424e-18	Rps6	7		GO:CC	intracellular anatomical structure	GO:0005622	FALSE	0.00351714	2.45381	17412	48	44	26995	CHIL3,RPLP2,RPS28,RPL36,CDKN1A,RPS15,RPL22,RPL38,PPIA,RPS29,RPS8,MRPL52,BCL2L15,RPS19,RPL14,RPS17,RPL8,RPS26,RGS1,RPLP1,DYNLL1,TNF,RPL35A,RPSA,RPL11,EGR1,HILPDA,RPS3,RPL5,PTMA,RPS18,CNBP,RPL32,RPS15A,RPL26,DUSP2,RPS21,SNRPG,CREB5,RPL12,RPS25,RPL36AL,RPL21,FOS
4.65159e-27	0.872457	0.886	0.741	9.21247e-23	Rpl37a	7		GO:CC	cytoplasmic side of membrane	GO:0098562	FALSE	0.00866131	2.06242	212	48	5	26995	RPS28,RPS29,RPS26,RGS1,GNGT2
7.7335e-22	0.872201	0.684	0.496	1.53162e-17	Atp5e	7		GO:CC	endoplasmic reticulum	GO:0005783	FALSE	0.0175685	1.75527	1861	48	12	26995	CHIL3,RPS28,RPS29,RPS8,RPS26,RPS3,RPL5,CNBP,RPS21,RPL36AL,RPL21,FOS
0.000362363	0.868983	0.38	0.224	1	Mt1	7		KEGG	Ribosome	KEGG:03010	FALSE	7.10551e-39	38.1484	170	40	28	9330	RPLP2,RPS28,RPL36,RPS15,RPL22,RPL38,RPS29,RPS8,RPS19,RPL14,RPS17,RPL8,RPS26,RPLP1,RPL35A,RPSA,RPL11,RPS3,RPL5,RPS18,RPL32,RPS15A,RPL26,RPS21,RPL12,RPS25,RPL36AL,RPL21
2.57527e-27	0.867849	0.899	0.73	5.10033e-23	Rps10	7		KEGG	Coronavirus disease - COVID-19	KEGG:05171	FALSE	2.52727e-38	37.5973	243	40	30	9330	RPLP2,RPS28,RPL36,RPS15,RPL22,RPL38,RPS29,RPS8,RPS19,RPL14,RPS17,RPL8,RPS26,RPLP1,TNF,RPL35A,RPSA,RPL11,RPS3,RPL5,RPS18,RPL32,RPS15A,RPL26,RPS21,RPL12,RPS25,RPL36AL,RPL21,FOS
6.00093e-14	0.865534	0.392	0.097	1.18848e-09	Mtdh	7		KEGG	Rheumatoid arthritis	KEGG:05323	FALSE	0.0388004	1.41116	87	40	4	9330	IL23A,CXCL1,TNF,FOS
7.20164e-16	0.86391	0.544	0.339	1.42628e-11	Ndufb1-ps	7
5.23933e-20	0.853498	0.544	0.204	1.03765e-15	Psmb3	7
3.17358e-25	0.85019	0.911	0.735	6.28527e-21	Rpl34	7
7.97432e-21	0.848863	0.772	0.534	1.57931e-16	Rpl13a	7
2.09256e-17	0.847936	0.633	0.337	4.14431e-13	Ndufa7	7
3.6014e-21	0.847784	0.418	0.064	7.13257e-17	Pfdn2	7
1.43517e-18	0.84738	0.468	0.261	2.84236e-14	Atp5b	7
3.88302e-10	0.845003	0.747	0.601	7.69033e-06	Bcl2a1b	7
2.01289e-24	0.83869	0.861	0.604	3.98652e-20	Rps11	7
5.48679e-15	0.835798	0.734	0.451	1.08666e-10	Cd63	7
1.0949e-18	0.834061	0.456	0.185	2.16844e-14	Micos10	7
2.59711e-17	0.83306	0.835	0.549	5.14357e-13	Ppp1r15a	7
3.70987e-24	0.827974	0.861	0.618	7.3474e-20	Elob	7
7.8939e-11	0.825013	0.899	0.891	1.56339e-06	Ier3	7
3.19446e-18	0.814755	0.544	0.287	6.32662e-14	Ost4	7
1.53095e-19	0.814493	0.772	0.377	3.03205e-15	Rabac1	7
1.06937e-16	0.814201	0.696	0.396	2.11788e-12	Hmgb1	7
2.08773e-14	0.810049	0.468	0.27	4.13475e-10	Sec62	7
3.88238e-16	0.806869	0.532	0.246	7.68906e-12	Rbx1	7
1.47234e-16	0.800139	0.418	0.131	2.91597e-12	Sf3b5	7
1.12518e-22	0.799677	0.81	0.638	2.22843e-18	Rps23	7
5.36532e-10	0.79798	0.127	0.022	1.0626e-05	Ltc4s	7
2.52776e-12	0.796596	0.392	0.139	5.00623e-08	Tpr	7
1.46764e-21	0.796474	0.937	0.769	2.90666e-17	Rpl18a	7
2.33124e-12	0.794939	0.557	0.372	4.61701e-08	Igfbp6	7
3.65802e-22	0.794697	0.835	0.637	7.2447e-18	Chchd2	7
3.47831e-17	0.794344	0.595	0.301	6.8888e-13	Rpl31	7
2.49491e-24	0.794055	0.873	0.739	4.94117e-20	Rpl9	7
2.24277e-23	0.793318	0.848	0.64	4.44181e-19	Rpl28	7
3.27837e-06	0.78903	0.152	0.027	0.0649281	Gm19951	7
2.99187e-08	0.786525	0.215	0.065	0.00059254	Hspe1	7
3.17168e-18	0.786097	0.582	0.288	6.28151e-14	Ube2i	7
3.38255e-25	0.785845	0.785	0.618	6.69914e-21	Rplp0	7
1.25599e-05	0.780962	0.291	0.245	0.248749	F630028O10Rik	7
3.44601e-18	0.780202	0.81	0.574	6.82482e-14	Rpl39	7
1.01954e-15	0.779294	0.38	0.075	2.01919e-11	Set	7
1.08355e-12	0.778965	0.329	0.163	2.14598e-08	Ppig	7
1.45919e-15	0.77862	0.316	0.089	2.88993e-11	Snrpd3	7
1.56972e-15	0.778614	0.785	0.588	3.10882e-11	Rpl24	7
5.83875e-16	0.778486	0.418	0.164	1.15636e-11	Taf10	7
1.69888e-08	0.773112	0.519	0.336	0.000336463	Bcl2a1d	7
4.0386e-15	0.77096	0.544	0.287	7.99845e-11	Nedd8	7
1.69593e-23	0.770921	0.975	0.839	3.35879e-19	Rps12	7
3.18169e-16	0.76628	0.785	0.54	6.30134e-12	Rpl27	7
3.61384e-14	0.763582	0.329	0.054	7.15721e-10	Eif3j1	7
2.43419e-15	0.760423	0.772	0.599	4.82092e-11	Atox1	7
3.24915e-23	0.758326	0.886	0.708	6.43494e-19	Rps13	7
5.47855e-18	0.757769	0.709	0.539	1.08503e-13	Rps7	7
2.3026e-14	0.754595	0.291	0.051	4.56029e-10	Hexb	7
1.2258e-20	0.751731	0.633	0.412	2.4277e-16	Btf3	7
3.51834e-11	0.748404	0.392	0.138	6.96807e-07	Nme2	7
8.15911e-13	0.744886	0.418	0.156	1.61591e-08	Rpl35	7
9.31217e-13	0.744483	0.747	0.459	1.84427e-08	Tgif1	7
1.42106e-13	0.743545	0.278	0.046	2.8144e-09	Krtcap2	7
1.2967e-08	0.742011	0.177	0.046	0.000256811	Entpd3	7
8.83755e-13	0.739732	0.392	0.162	1.75028e-08	Cox7b	7
3.93616e-14	0.738426	0.797	0.536	7.79556e-10	Eif5	7
1.22375e-07	0.736572	0.468	0.239	0.00242364	Zfp36l2	7
2.45907e-10	0.733777	0.329	0.102	4.8702e-06	Eif3c	7
1.57717e-12	0.733368	0.291	0.063	3.12359e-08	Mrps24	7
1.26342e-13	0.730818	0.418	0.174	2.50219e-09	Sumo2	7
0.000102865	0.730383	0.506	0.327	1	Bcl2a1a	7
1.19188e-15	0.725898	0.747	0.496	2.36051e-11	Vamp8	7
1.40572e-11	0.724572	0.266	0.06	2.78402e-07	Mrps33	7
1.39115e-06	0.723598	0.278	0.147	0.0275517	Rgs2	7
2.04503e-12	0.721995	0.494	0.234	4.05017e-08	Calr	7
1.82495e-15	0.721929	0.405	0.229	3.61431e-11	Atp5mpl	7
1.9639e-11	0.720175	0.38	0.134	3.88951e-07	1110008P14Rik	7
5.20271e-10	0.7198	0.291	0.129	1.0304e-05	Pycard	7
2.88732e-16	0.71744	0.734	0.482	5.71834e-12	Hnrnpa2b1	7
2.34089e-11	0.713477	0.354	0.115	4.63612e-07	Mrfap1	7
1.01657e-10	0.71278	0.241	0.04	2.01333e-06	Aim2	7
8.57164e-13	0.712727	0.316	0.075	1.69761e-08	Ndufs7	7
2.43606e-21	0.710329	0.987	0.837	4.82461e-17	Rpl23	7
5.9826e-17	0.710303	0.911	0.766	1.18485e-12	Rpl17	7
2.02472e-12	0.709274	0.443	0.237	4.00995e-08	Rheb	7
2.9597e-19	0.709098	0.899	0.776	5.86169e-15	Cox8a	7
3.98398e-13	0.708353	0.43	0.257	7.89028e-09	Psma7	7
2.11264e-16	0.707067	0.747	0.496	4.18409e-12	Rpl7	7
5.1357e-19	0.706502	0.949	0.787	1.01713e-14	Rps24	7
1.48103e-15	0.705694	0.544	0.34	2.93318e-11	Atp5j	7
2.39653e-10	0.69938	0.823	0.654	4.74632e-06	Ifrd1	7
3.67457e-12	0.69751	0.354	0.09	7.2775e-08	Dad1	7
1.78609e-07	0.693311	0.101	0.011	0.00353734	H1f0	7
1.63979e-11	0.692226	0.544	0.248	3.2476e-07	Naca	7
1.30323e-12	0.688509	0.367	0.144	2.58106e-08	Rbm8a	7
2.59629e-11	0.686415	0.342	0.096	5.14196e-07	Pdap1	7
5.02258e-12	0.685574	0.506	0.343	9.94723e-08	Rbm3	7
9.15178e-09	0.685529	0.646	0.503	0.000181251	Socs3	7
7.18454e-12	0.685378	0.329	0.077	1.4229e-07	Hnrnpab	7
1.03499e-11	0.683999	0.544	0.294	2.0498e-07	Srsf3	7
1.38441e-07	0.681103	0.392	0.177	0.00274183	E230032D23Rik	7
7.9021e-10	0.681052	0.519	0.314	1.56501e-05	Rbm25	7
1.0086e-09	0.679103	0.57	0.266	1.99752e-05	Hist1h2bc	7
6.79542e-13	0.678988	0.494	0.291	1.34583e-08	Ndufa2	7
3.84553e-11	0.678348	0.38	0.166	7.61607e-07	Grcc10	7
3.65336e-11	0.677957	1	0.989	7.23548e-07	Il1b	7
2.74606e-07	0.67599	0.165	0.034	0.00543858	Dpep2	7
7.28856e-14	0.674392	0.481	0.239	1.4435e-09	Atp5j2	7
2.56072e-11	0.668965	0.278	0.058	5.0715e-07	Sod1	7
4.82256e-11	0.668924	0.241	0.061	9.55108e-07	Zfp706	7
3.79829e-10	0.66859	0.329	0.101	7.52252e-06	Serbp1	7
7.22917e-10	0.667686	0.608	0.459	1.43174e-05	Ier2	7
0.0107874	0.667677	0.19	0.162	1	Ccl9	7
4.71498e-12	0.667486	0.253	0.071	9.33801e-08	Trmt112	7
2.86868e-08	0.66718	0.329	0.113	0.000568142	Sirpb1c	7
6.81811e-09	0.667159	0.203	0.052	0.000135033	Nt5e	7
2.39822e-11	0.666817	0.456	0.241	4.74967e-07	Cox5a	7
3.65749e-12	0.666651	0.557	0.323	7.24366e-08	Ybx1	7
1.5803e-15	0.662806	0.747	0.579	3.12978e-11	Rpl10	7
6.82069e-08	0.661959	0.405	0.213	0.00135084	Ptgs2os2	7
3.15442e-11	0.661908	0.367	0.097	6.24732e-07	Hint1	7
3.05936e-11	0.660811	0.405	0.187	6.05906e-07	Ndufa6	7
7.53245e-10	0.659782	0.266	0.066	1.4918e-05	Atp5g1	7
7.26531e-16	0.659741	0.253	0.026	1.43889e-11	0610010K14Rik	7
4.30588e-12	0.658458	0.506	0.264	8.5278e-08	Tmem59	7
1.45983e-10	0.656923	0.278	0.088	2.89119e-06	Polr2k	7
4.84579e-11	0.656127	0.443	0.206	9.59709e-07	Uqcr10	7
8.44226e-08	0.655284	0.354	0.158	0.00167199	Cited2	7
1.73601e-17	0.655052	0.835	0.763	3.43816e-13	Eef1a1	7
3.14756e-09	0.653768	0.392	0.18	6.23374e-05	Ncl	7
2.20973e-07	0.652778	0.557	0.378	0.00437637	Txnip	7
3.06329e-09	0.652598	0.468	0.212	6.06684e-05	Eif2s2	7
1.16448e-10	0.652152	0.532	0.313	2.30625e-06	Hnrnpa0	7
5.68337e-11	0.650342	0.329	0.102	1.12559e-06	Uqcr11	7
3.46649e-11	0.646222	0.392	0.176	6.86538e-07	Rpl4	7
2.35355e-16	0.64512	0.241	0.016	4.6612e-12	Fkbp3	7
6.07686e-09	0.644882	0.367	0.133	0.000120352	St13	7
8.54264e-08	0.643435	0.266	0.093	0.00169187	Llph	7
9.095e-10	0.640284	0.848	0.764	1.80127e-05	Zfp36	7
5.51591e-12	0.638759	0.43	0.223	1.09243e-07	Srp14	7
8.57809e-13	0.638274	0.304	0.063	1.69889e-08	Park7	7
0.000837365	0.637936	0.203	0.103	1	Ccl8	7
2.89695e-10	0.637138	0.304	0.092	5.73741e-06	Tmed9	7
1.55787e-15	0.637056	0.975	0.837	3.08536e-11	Rps27a	7
5.42682e-10	0.635413	0.165	0.015	1.07478e-05	Cgas	7
5.71282e-14	0.634068	0.253	0.035	1.13142e-09	Emc6	7
4.45256e-10	0.632983	0.342	0.138	8.81829e-06	Znrd1	7
9.01799e-14	0.631042	0.215	0.023	1.78601e-09	Ranbp1	7
6.79706e-10	0.629772	0.354	0.15	1.34616e-05	Aprt	7
3.68865e-11	0.628761	0.228	0.056	7.30537e-07	Akap9	7
3.81247e-11	0.627973	0.873	0.879	7.55061e-07	Resf1	7
8.09908e-11	0.625972	0.722	0.503	1.60402e-06	Calm2	7
1.09865e-08	0.62454	0.367	0.162	0.000217588	Tomm20	7
1.87574e-08	0.621831	0.43	0.306	0.000371491	Clec5a	7
9.46336e-11	0.619162	0.354	0.143	1.87422e-06	Uqcrb	7
8.06881e-09	0.616358	0.152	0.018	0.000159803	Ptpn22	7
6.73229e-09	0.615566	0.354	0.116	0.000133333	Snu13	7
2.83111e-12	0.615403	0.861	0.711	5.60702e-08	Tnfaip3	7
1.19032e-09	0.613583	0.266	0.079	2.35742e-05	Dnttip2	7
9.38318e-10	0.613518	0.228	0.041	1.85834e-05	Fubp1	7
1.4179e-13	0.607736	0.557	0.457	2.80814e-09	Cox5b	7
6.4424e-09	0.607163	0.253	0.074	0.000127592	Ccdc59	7
3.65825e-10	0.606873	0.392	0.232	7.24516e-06	Ndufb7	7
1.64347e-08	0.60578	0.329	0.12	0.000325489	Srsf7	7
1.53988e-05	0.604634	0.456	0.27	0.304974	Hist1h1c	7
2.12797e-05	0.603112	0.506	0.398	0.421444	Hsp90ab1	7
2.17646e-09	0.602753	0.228	0.053	4.31049e-05	Ndufc1	7
2.75229e-10	0.599801	0.329	0.083	5.45092e-06	Atp5g2	7
9.05361e-11	0.59971	0.266	0.059	1.79307e-06	Snrpd2	7
3.31018e-06	0.599323	0.468	0.434	0.0655582	Cwc25	7
1.49973e-17	0.599172	0.937	0.871	2.97021e-13	Gng5	7
3.01739e-08	0.598396	0.342	0.192	0.000597595	Rpl10a	7
2.74113e-11	0.597892	0.329	0.078	5.42881e-07	Ran	7
1.05346e-13	0.597828	0.253	0.031	2.08638e-09	Snrpf	7
7.26323e-10	0.59779	0.392	0.165	1.43848e-05	Polr1d	7
1.60468e-09	0.593423	0.506	0.319	3.17806e-05	Pcbp2	7
1.02648e-06	0.591958	0.304	0.122	0.0203294	Bax	7
3.3433e-16	0.589267	1	0.981	6.62141e-12	Fau	7
5.8378e-11	0.586803	0.557	0.431	1.15618e-06	Uqcrq	7
1.66336e-07	0.585078	0.342	0.177	0.00329429	Pcf11	7
3.99027e-08	0.582635	0.19	0.029	0.000790273	Eprs	7
4.52834e-08	0.581675	0.354	0.151	0.000896838	Spcs2	7
5.72095e-08	0.581219	0.57	0.485	0.00113303	Hspa8	7
1.02534e-08	0.57989	0.354	0.201	0.000203069	Edf1	7
3.77887e-08	0.579524	0.342	0.161	0.000748405	Psmb5	7
1.57644e-08	0.578337	0.291	0.103	0.000312213	Actn4	7
2.98629e-08	0.578083	0.481	0.285	0.000591435	Prrc2c	7
4.9351e-08	0.57793	0.203	0.044	0.000977396	Rbis	7
7.60203e-09	0.577228	0.241	0.064	0.000150558	Tardbp	7
1.51993e-09	0.576944	0.38	0.172	3.01023e-05	Ddx24	7
1.20941e-08	0.576579	0.253	0.087	0.000239523	Gng10	7
4.36527e-08	0.576344	0.38	0.173	0.000864543	Rpl36a	7
1.0934e-08	0.574061	0.392	0.254	0.000216547	Fam104a	7
1.00974e-07	0.570333	0.557	0.363	0.00199979	Hnrnpf	7
5.20475e-08	0.569389	0.266	0.083	0.0010308	Cirbp	7
1.76606e-09	0.569106	0.481	0.288	3.49769e-05	Ubxn1	7
6.45106e-10	0.569087	0.241	0.048	1.27763e-05	Cct5	7
2.86918e-08	0.566546	0.329	0.173	0.000568241	Mpc2	7
1.68415e-08	0.564248	0.304	0.118	0.000333546	Hnrnpd	7
6.65765e-08	0.562893	0.354	0.166	0.00131855	Atf1	7
4.83473e-08	0.562747	1	0.985	0.000957517	H3f3b	7
1.19534e-07	0.562649	0.278	0.151	0.00236738	Scarb2	7
2.30471e-09	0.560605	0.316	0.106	4.56449e-05	Eif4e2	7
1.42813e-08	0.55808	0.468	0.336	0.000282841	Timm10b	7
2.2228e-08	0.557301	0.62	0.482	0.000440225	Atp6v1f	7
3.86158e-08	0.557187	0.367	0.19	0.000764786	Yy1	7
2.24884e-06	0.557127	0.62	0.475	0.0445383	Chd7	7
1.05661e-07	0.556954	0.684	0.561	0.00209261	D8Ertd738e	7
9.37461e-07	0.555404	0.253	0.077	0.0185664	Zranb2	7
5.05624e-09	0.555326	0.342	0.165	0.000100139	Rps27rt	7
8.8411e-08	0.555223	0.316	0.14	0.00175098	Eif3h	7
3.58787e-08	0.554993	0.241	0.077	0.000710578	Eef1d	7
1.04991e-06	0.55327	0.544	0.402	0.0207935	Emd	7
0.00717784	0.552418	0.152	0.077	1	Acsl1	7
1.35149e-07	0.551499	0.165	0.035	0.00267662	Hdgf	7
1.27623e-06	0.551147	0.354	0.184	0.0252757	Zmiz1	7
8.39156e-10	0.550373	0.329	0.171	1.66195e-05	Ndufa1	7
1.17895e-08	0.550303	0.19	0.038	0.000233491	Pcbd2	7
1.27768e-11	0.550042	0.734	0.622	2.53045e-07	Atp5l	7
9.75381e-05	0.548779	0.43	0.264	1	H2-Q7	7
1.79836e-07	0.548335	0.215	0.064	0.00356165	Frrs1	7
5.18649e-10	0.547372	0.278	0.059	1.02719e-05	U2af1	7
1.18404e-08	0.547012	0.342	0.204	0.000234499	Snrpc	7
2.17777e-10	0.546523	0.494	0.318	4.31308e-06	Atp5h	7
7.6116e-05	0.544962	0.468	0.383	1	Cd74	7
8.37704e-07	0.543476	0.266	0.103	0.0165907	Canx	7
7.22902e-09	0.5426	0.582	0.389	0.000143171	Eif5a	7
1.59871e-08	0.54252	0.177	0.024	0.000316625	Ddx21	7
2.12476e-09	0.541932	0.532	0.419	4.20809e-05	H2afj	7
3.28988e-12	0.540623	0.203	0.019	6.51561e-08	Banf1	7
6.60603e-15	0.540566	0.177	0.007	1.30832e-10	Scimp	7
1.30778e-08	0.538154	0.392	0.238	0.000259005	Leprotl1	7
2.86043e-10	0.538017	0.253	0.06	5.66509e-06	Emc7	7
2.01408e-06	0.537756	0.519	0.322	0.0398888	Ctss	7
6.44669e-10	0.537609	0.291	0.181	1.27677e-05	Mrps21	7
1.56897e-08	0.537567	0.468	0.337	0.000310734	Csde1	7
1.73562e-06	0.537196	0.241	0.081	0.034374	Gcnt1	7
3.96286e-06	0.536739	0.405	0.179	0.0784845	Ifi207	7
2.22253e-13	0.536624	0.987	0.975	4.40173e-09	Pim1	7
1.88117e-07	0.535422	0.481	0.375	0.00372566	Hnrnpc	7
1.2241e-06	0.534156	0.937	0.889	0.0242433	Btg2	7
1.18687e-08	0.533554	0.722	0.637	0.00023506	Laptm5	7
1.34386e-06	0.533484	0.253	0.131	0.0266152	Rbbp6	7
9.01428e-10	0.533336	0.633	0.426	1.78528e-05	Rpl29	7
2.79345e-06	0.532733	0.722	0.608	0.0553243	Stk17b	7
5.21555e-08	0.531941	0.139	0.054	0.00103294	Naip2	7
1.8863e-08	0.531806	0.342	0.168	0.000373582	Mien1	7
8.58065e-07	0.531019	0.241	0.184	0.016994	Adrb2	7
6.90713e-08	0.529655	0.291	0.118	0.00136796	Mrpl54	7
2.42388e-06	0.52964	0.127	0.052	0.0480049	Syncrip	7
8.98972e-07	0.529149	0.316	0.165	0.0178041	Rer1	7
2.21014e-10	0.529051	0.19	0.024	4.37718e-06	Ptgs1	7
3.45381e-08	0.5285	0.278	0.1	0.000684027	Papola	7
2.667e-08	0.528049	0.418	0.257	0.0005282	Ndufa3	7
1.43396e-11	0.526458	0.241	0.035	2.83995e-07	Psmc5	7
8.43605e-08	0.52576	0.266	0.084	0.00167076	Rnf7	7
2.44342e-08	0.525629	0.19	0.034	0.00048392	Uqcc2	7
1.15284e-10	0.523312	0.975	0.978	2.2832e-06	Nfkbia	7
3.95998e-07	0.52261	0.152	0.033	0.00784274	Lrrc41	7
9.32187e-14	0.522529	0.152	0.006	1.8462e-09	Cysltr1	7
1.97665e-06	0.522317	0.456	0.359	0.0391476	Xist	7
2.57118e-11	0.522309	0.139	0.006	5.09222e-07	Hist1h4h	7
1.65883e-08	0.522199	0.291	0.093	0.000328531	Thrap3	7
6.528e-09	0.521452	0.152	0.019	0.000129287	Med12l	7
1.07019e-06	0.521153	0.228	0.082	0.0211952	U2surp	7
5.52956e-06	0.520244	0.342	0.185	0.109513	Snrnp70	7
6.2768e-11	0.520026	0.253	0.153	1.24312e-06	Cops9	7
1.74296e-07	0.519495	0.139	0.025	0.00345194	Rex1bd	7
5.34415e-07	0.517274	0.316	0.173	0.0105841	Atp5k	7
1.0947e-07	0.515345	0.241	0.073	0.00216805	Rnaseh2c	7
6.8775e-08	0.514899	0.19	0.046	0.00136209	Dpm3	7
5.04604e-07	0.514795	0.215	0.057	0.00999367	Pfdn6	7
7.58598e-08	0.514792	0.177	0.028	0.0015024	Snhg1	7
5.97106e-10	0.514377	0.228	0.036	1.18257e-05	Polr2f	7
1.82483e-07	0.513229	0.253	0.13	0.00361408	Ndufa4	7
6.76036e-09	0.512045	0.532	0.383	0.000133889	Eef1b2	7
8.6714e-09	0.511221	0.468	0.323	0.000171737	Tma7	7
2.71774e-08	0.508326	0.392	0.218	0.000538248	Psma2	7
1.24829e-07	0.508107	0.203	0.044	0.00247223	P2ry13	7
4.0961e-08	0.508097	0.228	0.071	0.000811233	Grpel1	7
6.3531e-07	0.507783	0.329	0.142	0.0125823	Senp6	7
2.98928e-06	0.507764	0.329	0.17	0.0592027	Slk	7
5.32156e-08	0.506435	0.316	0.125	0.00105394	Psmb6	7
1.50433e-07	0.506266	0.392	0.237	0.00297933	Ier3ip1	7
3.96137e-07	0.506169	0.139	0.104	0.0078455	Med21	7
4.3374e-07	0.505539	0.354	0.188	0.00859022	Magoh	7
8.23716e-06	0.505007	0.633	0.491	0.163137	Csrnp1	7
2.06263e-09	0.504629	0.228	0.058	4.08503e-05	Mea1	7
3.65623e-05	0.50453	0.354	0.237	0.724117	Xbp1	7
1.52285e-07	0.504162	0.228	0.1	0.00301601	Strap	7
1.29101e-06	0.503455	0.443	0.323	0.0255685	Hnrnpu	7
2.17565e-05	0.503328	0.127	0.024	0.430887	Hspd1	7
8.20995e-09	0.503303	0.519	0.43	0.000162598	Rnasek	7
8.96832e-06	0.502553	0.62	0.5	0.177618	Bhlhe40	7
1.25857e-06	0.502198	0.19	0.04	0.0249259	Rcbtb2	7
4.59714e-06	0.501749	0.215	0.091	0.0910464	Vps37a	7
3.59527e-07	0.500545	0.316	0.158	0.00712043	Aurkaip1	7
0.000680076	0.500448	0.494	0.428	1	Gm20186	7
1.28138e-06	0.499638	0.253	0.141	0.0253778	N4bp2l2	7
4.49624e-06	0.499559	0.785	0.778	0.089048	Tnfaip2	7
7.01421e-10	0.49939	0.253	0.044	1.38917e-05	Pebp1	7
5.71468e-07	0.49915	0.177	0.041	0.0113179	Nol7	7
8.96909e-07	0.498355	0.278	0.155	0.0177633	Eif4h	7
1.37292e-07	0.497546	0.19	0.044	0.00271907	Ndufb5	7
8.13393e-06	0.497207	0.304	0.179	0.161092	Ski	7
1.99413e-08	0.496216	0.139	0.013	0.000394937	Mrpl42	7
4.22845e-06	0.495848	0.443	0.245	0.0837444	Pnp	7
1.4753e-08	0.495086	0.608	0.408	0.000292182	Brk1	7
2.21077e-05	0.494296	0.38	0.2	0.437843	Eapp	7
6.9202e-07	0.493852	0.203	0.048	0.0137054	Nop10	7
0.000441559	0.493679	0.241	0.117	1	Fam133b	7
4.73395e-08	0.492965	0.266	0.09	0.000937559	Dpm1	7
3.17865e-07	0.491745	0.152	0.078	0.00629532	Rdx	7
4.97847e-08	0.491536	0.228	0.131	0.000985987	Selenof	7
1.91572e-06	0.490521	0.291	0.155	0.0379409	Ergic2	7
1.32375e-05	0.489285	0.38	0.218	0.262168	Drap1	7
2.65482e-06	0.489218	0.228	0.066	0.0525787	E030030I06Rik	7
8.70401e-05	0.488502	0.684	0.587	1	Cdk2ap2	7
1.57269e-07	0.488236	0.456	0.28	0.00311472	Pabpn1	7
0.000278477	0.486204	0.253	0.148	1	Atpif1	7
4.53418e-07	0.486133	0.215	0.06	0.00897994	Pin4	7
1.29002e-06	0.485239	0.329	0.16	0.0255489	Akr1a1	7
1.85082e-06	0.483524	0.152	0.039	0.0366554	Gm43672	7
8.24741e-08	0.481427	0.165	0.047	0.0016334	Tmco1	7
5.0996e-08	0.480384	0.203	0.049	0.00100998	Spag7	7
5.95329e-08	0.480347	0.177	0.061	0.00117905	Ginm1	7
9.10567e-07	0.479696	0.291	0.143	0.0180338	Bag1	7
1.83882e-06	0.479386	0.228	0.084	0.0364179	Ndufb4	7
1.56634e-05	0.478633	0.253	0.22	0.310214	H2-Aa	7
2.68763e-05	0.477762	0.405	0.377	0.532285	Phlda1	7
3.64591e-08	0.477497	0.215	0.048	0.000722073	Eif3m	7
2.80361e-06	0.477083	0.304	0.206	0.0555255	Rpl3	7
3.18585e-05	0.476708	0.38	0.239	0.630957	Mob1a	7
4.29511e-06	0.476555	0.405	0.309	0.0850647	Map4k4	7
0.000288427	0.476462	0.582	0.528	1	Apoe	7
2.36743e-07	0.47446	0.19	0.063	0.00468869	Nucb2	7
2.10759e-06	0.474272	0.152	0.028	0.0417408	Snrnp48	7
1.04686e-06	0.473651	0.418	0.272	0.0207331	Smdt1	7
1.86371e-06	0.47307	0.532	0.376	0.0369108	Tmed10	7
0.000375352	0.47198	0.468	0.393	1	Zfand5	7
5.90087e-08	0.471947	0.203	0.04	0.00116867	Rnps1	7
6.11386e-06	0.471482	0.215	0.097	0.121085	Mrpl30	7
3.25979e-11	0.471266	0.139	0.012	6.45602e-07	Emc4	7
3.10486e-09	0.47122	0.19	0.025	6.14917e-05	Sumo3	7
4.52965e-08	0.470748	0.266	0.078	0.000897096	Romo1	7
1.18005e-06	0.470297	0.266	0.126	0.023371	Ndufv3	7
3.52386e-06	0.469559	0.253	0.077	0.06979	B4galt1	7
5.06975e-08	0.469554	0.481	0.353	0.00100406	Eloc	7
0.00011649	0.468396	0.19	0.075	1	Kdm1a	7
7.3089e-06	0.467496	0.342	0.168	0.144753	Hsp90b1	7
1.48992e-05	0.467366	0.329	0.161	0.295078	Pcbp1	7
0.00010947	0.46697	0.468	0.302	1	Wnk1	7
8.1573e-07	0.466603	0.316	0.181	0.0161555	Cmtm7	7
3.24603e-07	0.466167	0.405	0.239	0.00642876	Abracl	7
5.39055e-08	0.465629	0.291	0.189	0.0010676	Tmem258	7
7.73156e-05	0.465237	0.19	0.063	1	Ecm1	7
2.27637e-05	0.465044	0.228	0.125	0.450835	Mia2	7
4.47071e-05	0.464759	0.241	0.087	0.885424	Ly6a	7
1.28412e-06	0.4645	0.203	0.052	0.025432	Snw1	7
1.31424e-05	0.464243	0.241	0.105	0.260286	Dek	7
0.000133531	0.464216	0.215	0.197	1	Fam111a	7
1.20271e-05	0.463425	0.38	0.209	0.238197	Atf4	7
1.47171e-06	0.463321	0.582	0.479	0.0291472	Ssu72	7
2.60973e-07	0.463303	0.215	0.058	0.00516858	Phf5a	7
5.05037e-06	0.463282	0.278	0.118	0.100023	Nek6	7
7.01007e-10	0.463033	0.203	0.024	1.38834e-05	Mydgf	7
3.86151e-06	0.46261	0.354	0.25	0.0764772	Mkrn1	7
5.54422e-06	0.461829	0.481	0.346	0.109803	Rpl7a	7
1.86966e-05	0.46153	0.342	0.156	0.370287	Ptges3	7
4.30088e-07	0.461433	0.253	0.171	0.00851789	Wbp11	7
8.41812e-10	0.460823	0.165	0.015	1.66721e-05	Nop58	7
1.15318e-06	0.460786	0.557	0.437	0.0228387	H2afz	7
3.22301e-07	0.459611	0.127	0.022	0.00638317	Larp7	7
5.31072e-06	0.459125	0.266	0.168	0.105179	Tlr4	7
2.30479e-12	0.457293	0.987	0.984	4.56463e-08	Tpt1	7
6.3745e-07	0.456365	0.367	0.273	0.0126247	Ltb4r1	7
2.90411e-07	0.456342	0.165	0.028	0.00575159	Il1bos	7
1.13786e-07	0.456335	0.241	0.06	0.00225353	Eif1ax	7
5.46737e-09	0.455131	0.165	0.027	0.000108281	Hpf1	7
3.24786e-06	0.454171	0.278	0.159	0.0643238	Sf1	7
5.80516e-07	0.452812	0.253	0.106	0.0114971	Spcs1	7
0.00136905	0.452671	0.215	0.094	1	Arl4c	7
5.18542e-05	0.451858	0.329	0.247	1	Plekho2	7
2.75738e-08	0.451421	0.152	0.018	0.000546099	Rab15	7
5.96776e-06	0.450542	0.278	0.131	0.118192	Cdv3	7
2.90268e-09	0.450394	0.658	0.58	5.74876e-05	Pfdn5	7
7.24762e-06	0.450004	0.266	0.157	0.143539	Adssl1	7
6.04635e-05	0.449931	0.215	0.085	1	Zcchc7	7
0.00349862	0.4496	0.481	0.338	1	Icam1	7
1.70052e-08	0.449233	0.127	0.013	0.000336789	Ilf2	7
2.35001e-07	0.449111	0.975	0.97	0.0046542	Junb	7
9.68148e-08	0.448879	0.165	0.04	0.00191742	Prpf8	7
1.76365e-06	0.445426	0.759	0.692	0.0349292	Cst3	7
5.03297e-07	0.445187	0.633	0.594	0.0099678	Fosl2	7
4.09189e-06	0.444289	0.304	0.203	0.0810399	Gas5	7
1.71778e-06	0.444113	0.241	0.087	0.0340206	Pdcd5	7
2.78103e-05	0.444068	0.241	0.118	0.550782	Cdc34	7
1.36036e-08	0.44372	0.177	0.027	0.00026942	Nudc	7
1.24152e-07	0.44338	0.772	0.723	0.00245884	Son	7
0.000523974	0.442958	0.291	0.151	1	Brd2	7
4.50229e-06	0.442818	0.177	0.05	0.0891678	Eif4g1	7
5.72423e-05	0.442524	0.43	0.299	1	Rack1	7
5.91836e-07	0.441087	0.101	0.048	0.0117213	Ccno	7
1.5719e-06	0.440852	0.266	0.128	0.0311315	Ostc	7
0.000127309	0.440516	0.316	0.21	1	Ik	7
8.45032e-06	0.439819	0.165	0.048	0.167359	Tpd52l2	7
2.39157e-07	0.438708	0.152	0.024	0.00473651	Lsm5	7
3.76813e-06	0.438337	0.354	0.254	0.0746279	Ywhae	7
3.34018e-05	0.438281	0.101	0.016	0.661522	Nr4a2	7
0.000582246	0.438279	0.177	0.075	1	Epc1	7
1.99115e-05	0.438269	0.177	0.056	0.394347	Selenos	7
6.51419e-06	0.437963	0.215	0.104	0.129014	Zfp622	7
1.03564e-08	0.437851	0.684	0.556	0.000205108	Cox4i1	7
1.39331e-05	0.437684	0.278	0.253	0.275946	Wac	7
6.3329e-06	0.437328	0.177	0.059	0.125423	Rrp1	7
2.96627e-05	0.437106	0.114	0.024	0.58747	Snhg15	7
2.33278e-08	0.436975	0.114	0.056	0.000462008	Ebp	7
2.93157e-06	0.43664	0.253	0.1	0.0580598	Gtf2a2	7
1.4741e-05	0.436573	0.392	0.24	0.291945	Derl1	7
2.42251e-05	0.435899	0.367	0.195	0.479777	Hnrnpm	7
0.000185765	0.435712	0.595	0.532	1	Zfp36l1	7
7.30279e-05	0.435614	0.316	0.197	1	Psmd4	7
2.64933e-05	0.435112	0.532	0.459	0.5247	Serinc3	7
0.000423564	0.435053	0.785	0.647	1	AA467197	7
1.67452e-06	0.433745	0.532	0.405	0.0331639	Sec61b	7
2.64728e-05	0.432334	0.291	0.181	0.524293	Ptk2b	7
3.09389e-06	0.431886	0.785	0.617	0.0612745	Skil	7
6.80126e-05	0.431483	0.329	0.182	1	Ssr4	7
1.36308e-05	0.43147	0.215	0.107	0.269958	Gosr2	7
7.49016e-07	0.431202	0.152	0.026	0.0148343	Pnn	7
2.12242e-06	0.431116	0.177	0.053	0.0420346	Psmb10	7
0.000153028	0.431012	0.177	0.078	1	Mbtd1	7
1.76971e-07	0.430931	0.405	0.352	0.00350491	Srsf11	7
9.69451e-06	0.430805	0.165	0.043	0.192	Anapc11	7
4.21535e-06	0.430715	0.266	0.113	0.0834851	Psmb7	7
1.67526e-05	0.430366	0.228	0.134	0.331786	Ndufs5	7
0.000570864	0.430171	0.316	0.193	1	Runx1	7
0.000805938	0.42962	0.62	0.524	1	Nr4a1	7
2.14331e-05	0.428266	0.177	0.048	0.424483	Ndufa12	7
5.39763e-05	0.427889	0.354	0.235	1	Tmem234	7
4.3511e-05	0.427243	0.506	0.433	0.861735	Gsn	7
8.89837e-06	0.426712	0.101	0.022	0.176232	Ssbp1	7
5.8353e-07	0.426433	0.165	0.031	0.0115568	Eif3g	7
5.55936e-05	0.426419	0.278	0.156	1	Ccl7	7
1.50206e-07	0.426214	0.19	0.032	0.00297483	Ndufab1	7
0.000432289	0.425111	0.253	0.111	1	Ctsa	7
3.47992e-05	0.423728	0.544	0.501	0.689197	Dusp5	7
0.00025509	0.423091	0.456	0.329	1	Jmjd1c	7
1.92263e-07	0.423	0.165	0.025	0.00380776	Adh5	7
3.301e-06	0.422844	0.165	0.032	0.0653763	Dnajc1	7
4.22988e-05	0.422586	0.165	0.082	0.837727	Atp13a3	7
1.42126e-06	0.422557	0.165	0.046	0.028148	Snrnp200	7
8.34987e-05	0.422312	0.228	0.094	1	Tmem179b	7
1.63756e-06	0.421394	0.139	0.023	0.0324318	Mrpl51	7
1.01409e-05	0.421357	0.203	0.093	0.20084	Tcea1	7
1.46727e-07	0.421248	0.203	0.035	0.00290593	Hspa9	7
0.000137785	0.420554	0.203	0.113	1	Sbds	7
9.22875e-07	0.420515	0.139	0.026	0.0182775	Eny2	7
0.000209312	0.420471	0.203	0.086	1	2810013P06Rik	7
0.000112511	0.420255	0.165	0.049	1	Naa50	7
9.24567e-05	0.420059	0.304	0.231	1	Clec2d	7
0.00136287	0.419747	0.215	0.14	1	Cir1	7
6.11323e-05	0.419179	0.291	0.117	1	Nars	7
0.00235537	0.418145	0.342	0.213	1	Cd300c2	7
2.45423e-05	0.417714	0.215	0.077	0.48606	Med28	7
1.72876e-06	0.416954	0.81	0.69	0.0342382	Srsf5	7
0.0036027	0.416721	0.19	0.083	1	Slc38a1	7
6.75884e-05	0.4166	0.177	0.049	1	Luc7l3	7
0.000609574	0.415729	0.304	0.226	1	Cycs	7
2.89215e-06	0.41562	0.203	0.07	0.0572791	Gps2	7
1.05653e-05	0.415461	0.342	0.253	0.209246	Ramac	7
2.86033e-05	0.414945	0.418	0.296	0.566488	Dph3	7
0.0221848	0.414706	0.215	0.155	1	Odc1	7
1.15119e-08	0.414535	0.481	0.461	0.000227993	Fam49b	7
5.63848e-06	0.414502	0.177	0.087	0.11167	Kif1b	7
0.000287857	0.414334	0.19	0.082	1	Prpf4b	7
2.43359e-06	0.414221	0.152	0.052	0.0481972	Bcas2	7
2.27457e-06	0.412962	0.646	0.562	0.0450479	Morf4l1	7
2.0479e-05	0.412854	0.177	0.051	0.405586	Nme1	7
0.000194075	0.412385	0.278	0.161	1	Hipk1	7
1.32491e-06	0.412035	0.203	0.112	0.0262398	Acadl	7
5.66916e-05	0.411985	0.544	0.475	1	Eif4g2	7
2.91842e-05	0.411578	0.241	0.139	0.577993	Rsbn1l	7
1.43765e-05	0.411446	0.139	0.033	0.284726	Vgll4	7
0.000358643	0.411002	0.392	0.285	1	Dot1l	7
2.42504e-05	0.410997	0.203	0.075	0.48028	Srp19	7
0.00559654	0.410138	0.291	0.19	1	Gpr84	7
0.00159761	0.409166	0.19	0.08	1	5830428M24Rik	7
4.56062e-07	0.40892	0.101	0.014	0.00903231	Atf5	7
0.00208898	0.408496	0.266	0.156	1	Tspan13	7
1.84367e-06	0.407269	0.165	0.047	0.0365139	Wdr89	7
2.97529e-06	0.406954	0.177	0.059	0.0589257	Lemd2	7
0.000148401	0.406558	0.114	0.034	1	Ddx41	7
1.36777e-05	0.405686	0.215	0.059	0.270887	Utp3	7
6.29422e-07	0.40549	0.152	0.023	0.0124657	Acot13	7
7.90924e-05	0.404803	0.456	0.394	1	Rrbp1	7
3.91951e-05	0.404286	0.139	0.039	0.776259	Magt1	7
1.39049e-05	0.403063	0.152	0.067	0.275386	Pak1ip1	7
1.40185e-05	0.402912	0.152	0.04	0.277636	Ift20	7
0.000136931	0.402848	0.278	0.214	1	Prkd3	7
0.0158211	0.402599	0.177	0.11	1	Ahnak	7
4.88197e-07	0.401549	0.127	0.014	0.00966873	Dock4	7
0.000460945	0.401463	0.392	0.293	1	Cdk11b	7
4.06594e-06	0.39836	0.127	0.02	0.0805259	Itgax	7
0.000172653	0.39824	0.291	0.184	1	Atp5d	7
2.68094e-05	0.398	0.19	0.079	0.530961	Csnk2a1	7
0.00033291	0.397607	0.241	0.127	1	Jpt1	7
0.000181852	0.39751	0.278	0.208	1	Baz1a	7
1.83842e-06	0.397407	0.19	0.04	0.03641	Mrps16	7
5.01985e-05	0.396408	0.215	0.185	0.994182	H2-Eb1	7
6.57039e-06	0.396405	0.443	0.348	0.130127	Vapa	7
6.72559e-05	0.396248	0.152	0.041	1	Ube3a	7
6.14601e-05	0.396241	0.443	0.309	1	Smndc1	7
1.45729e-08	0.395531	0.177	0.14	0.000288616	Isca1	7
7.75291e-06	0.395201	0.481	0.387	0.153546	Rps4x	7
0.00048586	0.394945	0.203	0.117	1	Itch	7
1.08614e-05	0.394902	0.165	0.045	0.215109	Txnl4a	7
0.000103451	0.39434	0.241	0.155	1	Sdf4	7
0.00157243	0.394292	0.266	0.158	1	Nufip2	7
3.71088e-05	0.394047	0.734	0.759	0.73494	Nlrp3	7
2.12117e-06	0.394027	0.962	0.894	0.0420097	Ubb	7
0.000537426	0.394024	0.873	0.824	1	Il1r2	7
4.92883e-05	0.393573	0.165	0.042	0.976155	Timm13	7
6.06803e-06	0.393358	0.241	0.148	0.120177	Borcs6	7
3.1431e-07	0.393295	0.43	0.411	0.00622491	1810058I24Rik	7
0.000128218	0.39323	0.532	0.459	1	Rsrc2	7
7.68243e-07	0.393212	0.139	0.02	0.0152151	Gtpbp4	7
5.41327e-06	0.392148	0.165	0.046	0.10721	Cdk2ap1	7
1.64973e-06	0.391898	0.165	0.029	0.032673	Snrpd1	7
2.95924e-05	0.391893	0.165	0.043	0.586078	Mrpl32	7
7.98284e-07	0.391785	0.203	0.044	0.01581	Mrps14	7
3.29044e-05	0.391632	0.241	0.106	0.651671	Tmem248	7
5.39089e-07	0.391526	0.101	0.008	0.0106766	Gm36660	7
4.38675e-06	0.390398	0.101	0.016	0.0868796	Polr2l	7
2.33518e-05	0.390364	0.215	0.071	0.462483	Ndufs6	7
5.04268e-07	0.390228	0.304	0.252	0.00998703	Bzw1	7
1.92603e-05	0.389979	0.177	0.068	0.381449	Eif4a3	7
0.000288165	0.389832	0.696	0.563	1	Ly6e	7
2.72164e-07	0.388835	0.937	0.811	0.00539021	Rpl37	7
1.42381e-05	0.388648	0.177	0.041	0.281985	Clptm1l	7
0.000109552	0.388488	0.228	0.132	1	Glud1	7
4.48046e-05	0.38812	0.152	0.047	0.887355	Akirin2	7
2.16129e-05	0.387928	0.215	0.149	0.428044	Ralbp1	7
0.005672	0.386073	0.367	0.284	1	Vegfa	7
0.000250722	0.384802	0.253	0.151	1	Polr2a	7
0.000135219	0.384418	0.177	0.085	1	Ndufb6	7
3.51654e-06	0.384035	0.165	0.031	0.069645	Rexo2	7
1.65775e-05	0.382304	0.241	0.118	0.328317	Gtf2f1	7
5.82902e-07	0.381908	0.127	0.02	0.0115444	Pnkd	7
4.9372e-05	0.381359	0.443	0.339	0.977812	Ndufb9	7
5.92898e-05	0.38096	0.139	0.049	1	Unc50	7
1.75573e-05	0.380733	0.139	0.028	0.347723	Zfp710	7
4.63035e-05	0.380693	0.19	0.064	0.917041	G3bp1	7
2.16003e-05	0.379635	0.215	0.102	0.427794	Eif6	7
0.000257031	0.378853	0.278	0.184	1	Zcrb1	7
1.63932e-05	0.378392	0.165	0.038	0.324668	Uchl5	7
0.000142267	0.377893	0.468	0.387	1	Syf2	7
0.000167117	0.377868	0.152	0.058	1	Amer2	7
0.000371575	0.377533	0.456	0.33	1	Cd300a	7
4.12221e-05	0.377308	0.139	0.038	0.816403	Rapgef2	7
0.00467708	0.377171	0.228	0.12	1	Cdc37	7
1.76578e-05	0.377097	0.152	0.036	0.349714	Mrpl36	7
0.000108692	0.37668	0.316	0.228	1	Lsm12	7
1.23097e-05	0.376164	0.139	0.027	0.243794	Ahcyl1	7
0.00310627	0.375718	0.456	0.337	1	Rnh1	7
6.79102e-07	0.375174	0.342	0.278	0.0134496	Lamtor1	7
1.59676e-05	0.374903	0.19	0.115	0.316238	Arglu1	7
0.00498347	0.374732	0.582	0.553	1	Lst1	7
7.35961e-07	0.374634	0.139	0.018	0.0145757	Eif1ad	7
1.46352e-05	0.37423	0.139	0.024	0.289851	Ciao1	7
9.0172e-05	0.373825	0.203	0.105	1	Mrpl43	7
0.000156426	0.373746	0.152	0.044	1	Fkbp1a	7
0.000337574	0.373517	0.177	0.065	1	Sec11a	7
0.000515549	0.373436	0.304	0.193	1	Fuca2	7
3.07874e-05	0.373261	0.253	0.14	0.609745	Pdia3	7
0.00211307	0.373045	0.241	0.118	1	Eif3a	7
8.51013e-05	0.372916	0.127	0.029	1	Otulinl	7
0.000177779	0.372566	0.177	0.069	1	Rwdd1	7
0.00143471	0.372554	0.114	0.039	1	Pim3	7
2.13703e-06	0.372307	0.899	0.773	0.0423239	Serf2	7
0.00021867	0.371741	0.177	0.099	1	Eef1g	7
0.000232577	0.371681	0.241	0.119	1	Zfp869	7
0.000206123	0.371361	0.354	0.224	1	Timm8b	7
2.09894e-05	0.37127	0.304	0.197	0.415694	Eif3k	7
0.000105999	0.370919	0.139	0.06	1	Supt5	7
5.59075e-05	0.370424	0.443	0.394	1	Arih2	7
0.000126735	0.369926	0.241	0.099	1	Cdc40	7
0.00070605	0.369888	0.203	0.096	1	Manf	7
1.55918e-05	0.369817	0.152	0.029	0.308795	Jtb	7
0.00231425	0.369718	0.241	0.146	1	Ranbp2	7
0.00018605	0.369554	0.215	0.119	1	Lamtor2	7
4.50211e-06	0.369391	0.443	0.381	0.0891644	Gpbp1	7
0.00224648	0.36912	0.228	0.12	1	Prnp	7
5.1674e-05	0.368034	0.544	0.459	1	Gpx4	7
6.13145e-05	0.366809	0.266	0.178	1	Stk4	7
5.45681e-05	0.366593	0.165	0.055	1	Tsix	7
0.000854942	0.366576	0.177	0.103	1	Rock2	7
3.67287e-05	0.36644	0.114	0.026	0.727411	Nudcd3	7
0.00102351	0.366362	0.215	0.093	1	Dgkz	7
5.04805e-07	0.366256	0.127	0.015	0.00999765	Pole4	7
0.00146669	0.365794	0.418	0.322	1	Maff	7
9.96034e-06	0.365718	0.456	0.351	0.197265	Rab5c	7
0.0011455	0.365236	0.316	0.225	1	Tm9sf3	7
0.000320731	0.365155	0.329	0.226	1	Dnajc5	7
0.000952764	0.365083	0.861	0.87	1	Dusp1	7
0.000339003	0.365072	0.165	0.114	1	Eif1b	7
1.36586e-05	0.364903	0.152	0.037	0.270508	Ccdc86	7
0.00082472	0.364789	0.139	0.045	1	Ptgs2os	7
0.000761854	0.364745	0.177	0.087	1	Ssb	7
9.7877e-05	0.364304	0.215	0.158	1	Med13	7
3.78492e-06	0.363779	0.139	0.057	0.0749604	Dnajc7	7
4.14745e-05	0.363493	0.139	0.037	0.821402	Cox20	7
0.000309009	0.363322	0.19	0.066	1	AI413582	7
0.00028445	0.362872	0.291	0.169	1	Psma3	7
2.49818e-05	0.362291	0.228	0.194	0.494765	Atxn7l3b	7
0.000351568	0.362012	0.595	0.414	1	Fus	7
0.00335123	0.361717	0.089	0.112	1	Tnfaip6	7
0.000340645	0.361648	0.139	0.065	1	Utp14a	7
3.88509e-05	0.361611	0.215	0.087	0.769442	Atp5o	7
0.000982584	0.361083	0.203	0.096	1	Scaf11	7
2.45213e-06	0.360716	0.253	0.189	0.0485644	Ralb	7
1.94567e-05	0.360376	0.19	0.065	0.385339	Psmc2	7
8.98765e-05	0.360221	0.139	0.055	1	Scamp3	7
1.14159e-05	0.359801	0.152	0.047	0.226093	Supt16	7
2.53099e-05	0.359773	0.278	0.215	0.501263	Hnrnpdl	7
9.16545e-06	0.359425	0.127	0.047	0.181522	Iws1	7
1.86588e-05	0.359295	0.177	0.043	0.369538	Polr2e	7
1.54223e-05	0.359279	0.114	0.071	0.305439	Bod1l	7
0.00239421	0.359166	0.304	0.198	1	Smarca5	7
0.000232269	0.35879	0.152	0.048	1	Mcfd2	7
0.000361758	0.358676	0.241	0.151	1	Srp9	7
0.00042929	0.358111	0.215	0.099	1	Atp5a1	7
0.000712735	0.357555	0.696	0.62	1	Prdx6	7
7.98804e-05	0.35735	0.101	0.017	1	Ino80e	7
0.000182808	0.35713	0.127	0.03	1	Ahcyl2	7
2.6038e-06	0.3567	0.506	0.46	0.0515683	Purb	7
0.00166648	0.356607	0.481	0.417	1	Nfkbid	7
0.000148816	0.355817	0.127	0.037	1	Dnase2a	7
4.99465e-06	0.355761	0.114	0.038	0.0989191	Rexo1	7
1.55767e-05	0.355509	0.177	0.046	0.308497	Zfp719	7
6.98321e-08	0.355424	0.127	0.01	0.00138302	Znhit2	7
0.00416427	0.355385	0.152	0.063	1	Abcg1	7
0.000299171	0.355305	0.253	0.17	1	Snrnp27	7
0.000875294	0.355298	0.316	0.237	1	Hsbp1	7
1.05383e-08	0.355217	0.139	0.012	0.000208712	Ddx27	7
0.00027528	0.355055	0.177	0.056	1	Sars	7
0.00171006	0.35487	0.304	0.277	1	Ddit3	7
0.000386579	0.354705	0.494	0.378	1	Sec61g	7
0.000126452	0.354582	0.127	0.036	1	Ergic1	7
1.61766e-05	0.354513	0.152	0.048	0.320378	Lypla2	7
6.9537e-05	0.354465	0.418	0.316	1	Sumo1	7
0.000507931	0.354317	0.215	0.138	1	Ewsr1	7
0.00347474	0.35424	0.203	0.104	1	Sltm	7
0.000274443	0.353844	0.114	0.035	1	Rgs10	7
0.000230103	0.353271	0.658	0.546	1	Srrm2	7
6.61863e-05	0.352877	0.177	0.051	1	Pgp	7
9.7982e-05	0.351756	0.494	0.503	1	Tuba1c	7
0.000938032	0.351587	0.19	0.084	1	Nsd1	7
0.000460619	0.351442	0.215	0.109	1	Cul1	7
2.03744e-05	0.351439	0.114	0.024	0.403515	Apba3	7
0.000111652	0.351301	0.278	0.2	1	Srpr	7
0.00253501	0.351298	0.165	0.086	1	Psma4	7
8.19506e-05	0.351222	0.114	0.031	1	Cetn3	7
0.000126756	0.350699	0.139	0.063	1	Tiprl	7
2.38344e-05	0.350044	0.203	0.055	0.472041	Gm16286	7
0.000880484	0.350015	0.304	0.166	1	Erp29	7
0.000372094	0.34862	0.228	0.088	1	Tnrc6c	7
3.35471e-05	0.348302	0.114	0.03	0.664401	Slc39a7	7
4.85352e-05	0.348159	0.127	0.029	0.96124	Rbm28	7
0.0162253	0.347757	0.266	0.181	1	Arf2	7
7.28058e-05	0.347614	0.481	0.416	1	Supt4a	7
0.000169625	0.347337	0.101	0.032	1	Rnpc3	7
0.00287429	0.347321	0.291	0.169	1	Kif5b	7
6.88202e-05	0.347302	0.165	0.043	1	0610012G03Rik	7
5.3733e-06	0.347242	0.494	0.45	0.106418	Shisa5	7
0.00455533	0.347156	0.304	0.216	1	Cpeb2	7
2.29718e-05	0.347028	0.127	0.021	0.454957	Mrpl23	7
0.00434928	0.346955	0.304	0.189	1	Dnajc8	7
1.2693e-05	0.346949	0.177	0.046	0.251386	Cct7	7
0.000103964	0.34687	0.38	0.279	1	Tmed2	7
4.15864e-05	0.346811	0.139	0.028	0.823618	Tcp1	7
0.000130533	0.346789	0.165	0.069	1	Elavl1	7
0.00216256	0.346651	0.152	0.069	1	Ctcf	7
0.00229488	0.346505	0.354	0.244	1	Sirpb1b	7
0.00100073	0.346121	0.304	0.183	1	Cox14	7
0.000104054	0.34563	0.19	0.058	1	Syngr2	7
0.0770163	0.345594	0.152	0.127	1	Inhba	7
0.000204283	0.345562	0.367	0.301	1	Eef2	7
5.96063e-05	0.345263	0.165	0.083	1	Sarnp	7
0.000314607	0.345051	0.152	0.059	1	Nsmce2	7
0.00266165	0.344757	0.139	0.058	1	Abcf1	7
0.000399316	0.343907	0.165	0.075	1	Ndufb2	7
0.00299576	0.343587	0.608	0.535	1	Nudt4	7
0.000844851	0.343469	0.291	0.162	1	Srsf2	7
1.5789e-05	0.342867	0.139	0.033	0.3127	Emg1	7
4.05037e-05	0.342811	0.127	0.023	0.802175	Yrdc	7
1.53859e-05	0.342193	0.127	0.019	0.304719	Dnajc2	7
1.01709e-05	0.34198	0.759	0.728	0.201434	Rbm39	7
0.000175196	0.341876	0.228	0.208	1	Stat1	7
4.56883e-05	0.340784	0.468	0.402	0.904856	Psenen	7
0.000683874	0.340634	0.241	0.108	1	Gtf2h5	7
0.000191643	0.340354	0.228	0.116	1	Ndufb8	7
0.000734865	0.340304	0.152	0.054	1	Cuta	7
0.000436061	0.340184	0.165	0.078	1	Pbrm1	7
0.00229554	0.340081	0.278	0.195	1	Sik1	7
2.45567e-05	0.339827	0.152	0.037	0.486346	Lypla1	7
0.00159246	0.339766	0.646	0.558	1	Gpx1	7
0.00529054	0.339754	0.253	0.163	1	St3gal1	7
0.000200897	0.339498	0.165	0.116	1	Gtf2b	7
0.00471287	0.338873	0.241	0.256	1	Tpbpa	7
0.000292981	0.338559	0.329	0.223	1	Chmp5	7
0.000382057	0.33822	0.278	0.273	1	Isy1	7
0.00303905	0.337958	0.38	0.328	1	Klf13	7
0.000203009	0.337927	0.19	0.113	1	Uqcrfs1	7
2.19424e-08	0.337875	0.114	0.006	0.000434569	AU020206	7
0.0428738	0.337825	0.506	0.506	1	Cyp4f18	7
0.00246286	0.337681	0.443	0.341	1	Ctsl	7
0.00379392	0.337409	0.57	0.452	1	Ctla2a	7
5.87035e-05	0.337229	0.101	0.029	1	Ppwd1	7
0.000467728	0.337117	0.304	0.299	1	Creg1	7
0.00135465	0.336969	0.19	0.111	1	Bclaf1	7
0.00014923	0.336774	0.114	0.03	1	Dhx15	7
0.00023336	0.336471	0.177	0.152	1	Fam50a	7
0.000148969	0.336121	0.152	0.042	1	Ms4a6d	7
0.000594265	0.336087	0.342	0.268	1	Sf3b2	7
0.000466004	0.336071	0.203	0.094	1	Cnot4	7
5.6251e-05	0.335745	0.139	0.038	1	Acadvl	7
0.00044629	0.335612	0.152	0.046	1	Mrpl17	7
0.000270472	0.334783	0.177	0.069	1	Zfhx3	7
0.000482951	0.334705	0.101	0.026	1	Cacybp	7
3.33325e-05	0.334237	0.127	0.03	0.66015	Chchd1	7
1.82417e-06	0.333847	0.177	0.032	0.0361277	Rpn2	7
0.000356032	0.333118	0.266	0.128	1	Psmb2	7
3.02385e-05	0.332934	0.114	0.06	0.598873	Trappc2l	7
0.00557645	0.332761	0.253	0.163	1	Sap18	7
0.00119149	0.332687	0.203	0.119	1	Ubr4	7
2.19092e-05	0.332594	0.203	0.173	0.433912	Rbm42	7
0.00885598	0.332081	0.139	0.067	1	Lgmn	7
0.00864737	0.332025	0.278	0.174	1	Id2	7
1.38633e-05	0.331998	0.114	0.022	0.274564	Tmem230	7
0.000459188	0.331106	0.101	0.048	1	D930030I03Rik	7
0.00496113	0.331067	0.127	0.101	1	Ctsj	7
0.000448759	0.33078	0.671	0.701	1	Slfn1	7
3.50968e-05	0.33078	0.367	0.343	0.695092	Ogfrl1	7
0.00145305	0.330693	0.253	0.16	1	Usf2	7
2.01807e-05	0.330408	0.114	0.016	0.399678	Nubp2	7
0.000477447	0.330203	0.101	0.039	1	Comtd1	7
0.000284775	0.330067	0.114	0.037	1	Uqcrc1	7
0.000600433	0.329958	0.608	0.567	1	Dennd4a	7
0.000170026	0.329689	0.165	0.057	1	Mrpl34	7
0.00117114	0.329541	0.241	0.151	1	Cr1l	7
5.46362e-05	0.329393	0.152	0.089	1	Ciao2a	7
0.00361104	0.32922	0.165	0.083	1	Casp8	7
0.000703549	0.328794	0.342	0.263	1	Reep3	7
0.00034006	0.328739	0.177	0.078	1	Nipa2	7
0.000110173	0.327587	0.127	0.034	1	Pum1	7
0.0647422	0.327337	0.241	0.177	1	Irf1	7
0.00260793	0.327326	0.139	0.052	1	Cystm1	7
0.000128307	0.327323	0.139	0.065	1	Vdac3	7
0.000307995	0.326953	0.152	0.062	1	Tpp2	7
0.000350841	0.326198	0.215	0.131	1	Txndc9	7
0.00129777	0.326013	0.203	0.115	1	Tbrg1	7
0.000251542	0.325961	0.203	0.122	1	Tbl1xr1	7
0.000529237	0.325782	0.215	0.143	1	Ube2r2	7
0.000139907	0.325617	0.139	0.033	1	Cenpx	7
1.76007e-05	0.325508	0.152	0.031	0.348582	Slirp	7
0.000392768	0.325225	0.139	0.052	1	Rab18	7
3.93489e-05	0.325033	0.582	0.549	0.779305	Scand1	7
0.000251057	0.324666	0.177	0.128	1	Rnf20	7
0.0221248	0.324627	0.228	0.13	1	Itpr2	7
0.000120003	0.324507	0.165	0.046	1	Tmem208	7
0.000116064	0.324467	0.519	0.48	1	Arf1	7
0.000940791	0.324466	0.177	0.127	1	Gabpb1	7
0.000365558	0.324447	0.127	0.044	1	Fip1l1	7
0.00221456	0.324299	0.241	0.14	1	Pgs1	7
0.0365624	0.324021	0.203	0.18	1	Cebpd	7
0.000146491	0.323715	0.127	0.031	1	Aco2	7
7.10223e-05	0.323388	0.139	0.029	1	Tsn	7
0.0138977	0.322972	0.165	0.071	1	Gm14636	7
0.000674952	0.322798	0.139	0.046	1	Mrpl57	7
1.44239e-05	0.322535	0.114	0.017	0.285665	Pom121	7
0.00443216	0.32246	0.506	0.475	1	Cytip	7
2.0386e-05	0.322293	0.127	0.032	0.403744	Cops6	7
0.000917526	0.32188	0.114	0.035	1	Fundc2	7
1.29578e-06	0.321879	0.38	0.373	0.0256629	Rtn4	7
0.00154158	0.321631	0.177	0.133	1	S100a4	7
7.25698e-06	0.321509	0.114	0.021	0.143724	Phospho2	7
2.30162e-05	0.321204	0.114	0.027	0.455835	Med1	7
0.00258939	0.321168	0.405	0.299	1	Arrb2	7
0.00152036	0.320694	0.291	0.243	1	Il17ra	7
0.00165145	0.320502	0.203	0.09	1	Zfp91	7
0.00052663	0.320418	0.266	0.163	1	Vps35	7
0.00182657	0.320327	0.316	0.232	1	Chmp3	7
0.003762	0.320118	0.203	0.136	1	Atg101	7
0.00218325	0.319999	0.139	0.065	1	Tor1a	7
5.68748e-05	0.319646	0.101	0.014	1	Rps19bp1	7
0.00284051	0.319616	0.253	0.179	1	Atp6v1b2	7
0.00336316	0.319603	0.139	0.055	1	Fkbp5	7
5.15148e-06	0.319599	0.468	0.473	0.102025	Uqcrh	7
0.000141277	0.319327	0.127	0.029	1	Bola2	7
0.00793226	0.319142	0.203	0.145	1	Fam162a	7
0.0608248	0.319128	0.203	0.134	1	Pnpla2	7
6.76651e-05	0.318985	0.203	0.119	1	Smim7	7
0.000508668	0.318783	0.215	0.158	1	Eif4a2	7
3.74772e-05	0.318752	0.127	0.034	0.742236	Agpat2	7
5.5922e-05	0.318357	0.127	0.028	1	Adrm1	7
0.0017888	0.3183	0.114	0.058	1	Taf1d	7
0.000518691	0.318047	0.177	0.104	1	Ndufb3	7
0.00438103	0.31791	0.481	0.361	1	Lamp1	7
1.23767e-05	0.317897	0.114	0.024	0.245121	Gspt1	7
0.000506248	0.317817	0.139	0.048	1	Skp1a	7
0.000327109	0.317275	0.127	0.033	1	Nsmce4a	7
0.000351643	0.317092	0.165	0.058	1	Polr2j	7
0.00873019	0.316435	0.342	0.253	1	Klhl24	7
0.00215402	0.316191	0.19	0.116	1	Usp19	7
0.000493375	0.315636	0.278	0.201	1	Golph3	7
0.000232013	0.315386	0.152	0.039	1	Timm23	7
0.0035008	0.315344	0.114	0.041	1	Mga	7
0.00079706	0.315021	0.165	0.075	1	Golga7	7
0.00092338	0.314385	0.139	0.062	1	BC004004	7
0.00053987	0.313982	0.152	0.076	1	Nono	7
0.0266868	0.313838	0.228	0.127	1	Fcgr2b	7
0.00322292	0.31375	0.342	0.261	1	Nipbl	7
0.000428616	0.313615	0.127	0.036	1	Ddx39b	7
0.00109672	0.313474	0.139	0.046	1	Fcf1	7
0.0290121	0.313441	0.177	0.112	1	Pmaip1	7
0.000263415	0.313092	0.861	0.828	1	Ubc	7
0.000704971	0.312902	0.152	0.058	1	Pank2	7
0.000561723	0.312848	0.114	0.031	1	Soat2	7
0.000366312	0.312835	0.127	0.038	1	B4galnt1	7
0.00215213	0.31257	0.506	0.388	1	Pet100	7
0.00150485	0.312538	0.177	0.078	1	Rbm27	7
0.000329285	0.312143	0.949	0.897	1	Atp6v0c	7
0.0028272	0.311712	0.203	0.09	1	Man1b1	7
7.10573e-05	0.311534	0.304	0.212	1	Hcfc1r1	7
0.00100885	0.311506	0.152	0.085	1	Arid1a	7
0.00117466	0.311305	0.152	0.062	1	Tm9sf2	7
0.000486419	0.311065	0.127	0.042	1	Rpl7l1	7
0.0139816	0.310979	0.165	0.079	1	Mbnl1	7
0.00864732	0.310733	0.203	0.121	1	Tpst2	7
0.00174123	0.31049	0.253	0.183	1	Tra2b	7
0.000640008	0.310443	0.177	0.067	1	Tsg101	7
6.1902e-05	0.310311	0.177	0.131	1	Wdr45b	7
0.000102061	0.309537	0.114	0.032	1	Ikbkg	7
0.00118594	0.309519	0.354	0.238	1	Csnk2b	7
0.0104737	0.309405	0.215	0.143	1	Cd69	7
0.00205253	0.309313	0.114	0.036	1	Ythdf1	7
3.06109e-05	0.309043	0.127	0.022	0.606249	Ddrgk1	7
6.28126e-05	0.308829	0.114	0.057	1	Gcc2	7
0.000246956	0.308703	0.532	0.471	1	Pabpc1	7
0.000930824	0.308431	0.354	0.256	1	Mdh2	7
0.000517446	0.308302	0.101	0.023	1	Pibf1	7
0.00268738	0.308256	0.165	0.069	1	Eml4	7
0.00320155	0.308068	0.127	0.051	1	Commd6	7
0.00196363	0.307722	0.139	0.044	1	Etfb	7
2.46398e-05	0.307626	0.114	0.02	0.487991	Rbmxl1	7
0.00213433	0.307469	0.203	0.135	1	Psma6	7
0.000397073	0.307113	0.152	0.062	1	Tmf1	7
0.000839731	0.306622	0.595	0.623	1	Cd47	7
1.49505e-05	0.306185	0.291	0.274	0.296094	Tlr13	7
0.00405737	0.306076	0.101	0.05	1	B3gnt5	7
0.0229586	0.30584	0.228	0.149	1	Pf4	7
0.00643986	0.305681	0.215	0.159	1	Lgals1	7
0.0010535	0.30568	0.127	0.054	1	Gt(ROSA)26Sor	7
0.000158271	0.305088	0.165	0.074	1	Rnf181	7
0.00118201	0.305088	0.177	0.063	1	Tnpo3	7
0.00105362	0.304908	0.152	0.051	1	1110004F10Rik	7
0.000530164	0.304729	0.165	0.059	1	Cd81	7
0.0023667	0.303711	0.316	0.199	1	Sys1	7
0.00172579	0.303388	0.177	0.087	1	Fam168b	7
0.00282167	0.303293	0.114	0.049	1	Nap1l1	7
0.00181579	0.302892	0.456	0.386	1	Ppp1r11	7
1.06898e-06	0.302764	0.127	0.016	0.0211712	Gps1	7
0.00652148	0.302126	0.127	0.051	1	Mysm1	7
0.00975859	0.301575	0.165	0.077	1	Ccnd2	7
0.0018724	0.301451	0.316	0.236	1	Ctnnb1	7
0.00856463	0.301079	0.253	0.167	1	Bst2	7
0.000230307	0.300957	0.114	0.026	1	Lsm1	7
0.000586335	0.300862	0.316	0.293	1	Srrm1	7
0.000126659	0.300542	0.646	0.603	1	Chmp2a	7
0.00251427	0.300523	0.127	0.06	1	Zc3h18	7
0.0006229	0.300246	0.127	0.043	1	Rtraf	7
0.00177376	0.30011	0.228	0.148	1	Psmc6	7
0.00198037	0.299904	0.228	0.158	1	S100a10	7
0.00373601	0.299802	0.367	0.294	1	Spata13	7
0.0103468	0.299799	0.278	0.217	1	H2-Ab1	7
0.000166181	0.299748	0.127	0.036	1	Sec13	7
3.87996e-05	0.29948	0.886	0.908	0.768427	Nfkbiz	7
0.00106549	0.299375	0.304	0.254	1	P4hb	7
0.00321387	0.298989	0.165	0.101	1	Plekhj1	7
0.00158809	0.298983	0.165	0.092	1	Ing3	7
0.000443447	0.298923	0.342	0.295	1	Ythdc1	7
0.00110277	0.298577	0.114	0.039	1	Mfsd10	7
0.00901881	0.298511	0.152	0.075	1	Spen	7
0.0202537	0.298478	0.304	0.258	1	Gpr35	7
0.0006251	0.29825	0.127	0.041	1	Mrpl18	7
0.000756462	0.298151	0.253	0.199	1	Lman2	7
0.00812295	0.298139	0.266	0.169	1	Tctex1d2	7
0.00606239	0.298	0.291	0.201	1	Tab2	7
0.00140668	0.297891	0.165	0.058	1	Sdha	7
4.6042e-06	0.297802	0.19	0.172	0.0911861	Ap2s1	7
0.0035188	0.297465	0.215	0.114	1	Nsa2	7
0.00196562	0.297275	0.228	0.168	1	Psmb1	7
0.000548161	0.297238	0.177	0.086	1	Polr2c	7
0.000476531	0.297237	0.114	0.027	1	Gm37800	7
0.00841326	0.296819	0.215	0.121	1	Rtf1	7
0.00191018	0.29663	0.114	0.038	1	Stip1	7
0.102102	0.296429	0.114	0.069	1	Ighm	7
0.000854993	0.296378	0.139	0.058	1	Tmx4	7
0.00482265	0.295775	0.165	0.087	1	4933434E20Rik	7
0.000490906	0.295748	0.165	0.051	1	Sec63	7
0.000108824	0.295031	0.101	0.034	1	Sf3b4	7
5.30329e-05	0.294891	0.861	0.853	1	Igkc	7
0.000909841	0.294622	0.101	0.021	1	Camkk1	7
0.00666946	0.294217	0.43	0.344	1	Slc38a2	7
0.00030562	0.293659	0.405	0.334	1	Bbip1	7
0.00828641	0.293393	0.354	0.205	1	F10	7
8.85547e-06	0.292982	0.114	0.013	0.175383	Timm17a	7
0.00151581	0.292958	0.139	0.05	1	Med4	7
2.5733e-05	0.292886	0.114	0.017	0.509642	Lsm2	7
0.00165202	0.291699	0.215	0.171	1	Ppp4r3b	7
0.000317744	0.291398	0.443	0.421	1	Npc2	7
0.000172765	0.291225	0.101	0.018	1	Pop4	7
0.00149605	0.290718	0.127	0.05	1	Mtch2	7
0.00117694	0.290206	0.177	0.098	1	Gpbp1l1	7
0.0236836	0.289963	0.177	0.116	1	Blvrb	7
0.00151844	0.289827	0.101	0.047	1	Itpripl2	7
0.001717	0.289463	0.278	0.249	1	Grn	7
0.000684678	0.289376	0.101	0.043	1	Ddx52	7
0.0034253	0.289346	0.215	0.167	1	Pcnp	7
0.00135141	0.289194	0.165	0.075	1	Usp7	7
0.000553951	0.28874	0.114	0.027	1	Ndufaf8	7
0.000640585	0.288268	0.228	0.175	1	Snf8	7
0.000214389	0.28813	0.177	0.121	1	Ppp2r1a	7
6.36431e-05	0.287092	0.392	0.42	1	Atp1b3	7
0.000185877	0.286792	0.595	0.609	1	Efhd2	7
0.00232668	0.286546	0.177	0.131	1	Tmem128	7
5.27497e-05	0.286333	0.608	0.602	1	Etf1	7
0.00173417	0.286302	0.139	0.059	1	Psmd2	7
0.000132169	0.286269	0.101	0.021	1	Hikeshi	7
4.06017e-05	0.286243	0.101	0.017	0.804116	Gars	7
2.77237e-05	0.28575	0.215	0.18	0.549067	Rnaset2a	7
0.000209848	0.285536	0.278	0.256	1	Ppib	7
0.000842324	0.285378	0.127	0.053	1	Rfxap	7
0.0154381	0.285115	0.165	0.08	1	Ifi30	7
0.000120504	0.284579	0.494	0.486	1	Retreg1	7
0.000157275	0.284573	0.266	0.211	1	Tomm22	7
0.0227631	0.284311	0.139	0.071	1	Tubb6	7
0.00383375	0.284279	0.127	0.06	1	2024-03-02	7
0.0054937	0.284271	0.152	0.085	1	Gm5617	7
0.000356621	0.284141	0.114	0.032	1	Smn1	7
0.00627326	0.283565	0.241	0.172	1	Elf1	7
0.0160347	0.283546	0.152	0.103	1	Lipa	7
0.000526783	0.283339	0.114	0.038	1	Uimc1	7
9.30428e-05	0.283121	0.101	0.026	1	Ppp4r3a	7
0.00132357	0.282882	0.152	0.072	1	Cdc26	7
0.0020719	0.282843	0.203	0.158	1	Cope	7
0.00819311	0.282528	0.342	0.225	1	Mdm2	7
0.0163475	0.282384	0.291	0.205	1	M6pr	7
0.0108271	0.28229	0.152	0.071	1	Col1a2	7
0.000799713	0.282159	0.506	0.429	1	Hnrnpk	7
0.00234459	0.281513	0.165	0.112	1	Ndufs4	7
3.69395e-05	0.281257	0.127	0.021	0.731586	Ube2e1	7
3.38686e-06	0.281243	0.405	0.418	0.0670767	Ube2d2a	7
0.00178636	0.281213	0.139	0.051	1	Pcna	7
0.0650748	0.281195	0.203	0.14	1	Tpbpb	7
0.0212693	0.280794	0.19	0.129	1	Swt1	7
0.00352293	0.280655	0.139	0.066	1	Fnbp4	7
2.36698e-05	0.280507	0.101	0.012	0.46878	Trnau1ap	7
0.00154116	0.280351	0.139	0.044	1	Gabpa	7
0.0157714	0.280176	0.203	0.108	1	Ttyh3	7
0.00281178	0.280146	0.228	0.157	1	Gsk3a	7
0.00965311	0.279485	0.139	0.051	1	Dtx4	7
0.00343954	0.279127	0.165	0.085	1	Tbcb	7
0.0115873	0.278477	0.367	0.332	1	Tnfrsf23	7
0.0016609	0.278368	0.127	0.051	1	Tuba1b	7
0.00327007	0.277808	0.152	0.072	1	Zkscan6	7
0.000824274	0.277546	0.101	0.027	1	Secisbp2	7
0.0274506	0.277496	0.278	0.224	1	Med13l	7
0.00903697	0.277395	0.165	0.069	1	Gse1	7
0.000565215	0.277042	0.127	0.054	1	Ngdn	7
0.00105846	0.27682	0.139	0.052	1	Uqcrc2	7
0.00119934	0.276778	0.241	0.206	1	Tmem167	7
0.000293432	0.276498	0.506	0.489	1	Rab2a	7
0.00483054	0.275677	0.177	0.077	1	Herpud2	7
0.00112706	0.27562	0.114	0.041	1	Mettl23	7
0.000203183	0.275468	0.241	0.201	1	Vdac2	7
6.32025e-05	0.275163	0.101	0.014	1	Smim27	7
0.00256642	0.274425	0.139	0.056	1	Leprot	7
0.00921882	0.274173	0.114	0.046	1	Ddi2	7
0.000785723	0.273931	0.165	0.056	1	Cct8	7
0.00147221	0.273697	0.127	0.062	1	Faf2	7
0.00256146	0.273464	0.203	0.13	1	Scamp2	7
0.00278797	0.2732	0.722	0.577	1	Igha	7
0.00165753	0.272968	0.114	0.073	1	Arl1	7
0.000119356	0.272592	0.228	0.212	1	Cab39	7
0.00753659	0.272446	0.127	0.056	1	U2af2	7
0.00545113	0.272418	0.114	0.05	1	Nfatc1	7
0.00146717	0.272295	0.101	0.03	1	Surf1	7
0.000989147	0.271922	0.468	0.448	1	Eif4a1	7
0.00183674	0.271913	0.165	0.065	1	Psmc3	7
0.0299005	0.271853	0.304	0.222	1	Cxcr4	7
0.00368921	0.271781	0.127	0.048	1	Ppm1g	7
0.00187009	0.271578	0.291	0.216	1	Reep5	7
0.00074277	0.271292	0.165	0.049	1	Swap70	7
0.00123199	0.271137	0.886	0.837	1	H2-K1	7
0.00170829	0.271023	0.759	0.662	1	Atp6v0e	7
0.00336444	0.270574	0.127	0.038	1	Ms4a6b	7
0.000881649	0.270445	0.139	0.09	1	Trappc5	7
0.0047483	0.270201	0.139	0.065	1	Cdipt	7
0.000124487	0.270166	0.81	0.845	1	Calm1	7
0.00444084	0.269965	1	1	1	Cxcl2	7
0.00512236	0.269329	0.139	0.107	1	Kdm5a	7
0.0123635	0.269254	0.152	0.08	1	Swi5	7
0.00185812	0.268687	0.101	0.024	1	Cfdp1	7
0.00100484	0.268552	0.177	0.131	1	Nr1h2	7
0.0166632	0.268503	0.165	0.079	1	Ilkap	7
0.00263652	0.268465	0.139	0.077	1	Hspa14	7
0.00113916	0.268251	0.316	0.252	1	Ppp4c	7
0.000227488	0.268189	0.101	0.054	1	Dcun1d5	7
0.00209874	0.268162	0.114	0.076	1	Pcmtd1	7
0.00239978	0.267674	0.152	0.063	1	Coa3	7
0.0106547	0.267443	0.228	0.14	1	Map2k2	7
0.0122517	0.267324	0.215	0.143	1	Sfr1	7
0.00983542	0.267285	0.152	0.084	1	Dnajb2	7
0.00244046	0.267053	0.101	0.025	1	Polr2i	7
0.00368843	0.267044	0.152	0.056	1	Ep400	7
0.00389808	0.266943	0.152	0.084	1	Trappc6b	7
0.00340776	0.266934	0.734	0.765	1	Cox17	7
0.00196524	0.266917	0.177	0.107	1	Szrd1	7
0.0148765	0.266712	0.342	0.243	1	Atp6ap1	7
0.000781705	0.266705	0.203	0.148	1	Ap2m1	7
0.00104441	0.266656	0.43	0.397	1	Serp1	7
0.00406069	0.266607	0.152	0.093	1	Gm11808	7
0.00557268	0.266567	0.127	0.062	1	Stam2	7
0.000198395	0.266396	0.316	0.27	1	Uba52	7
0.00562278	0.266381	0.101	0.036	1	Sertad2	7
0.00418282	0.266237	0.165	0.077	1	Sap30l	7
6.0072e-05	0.265901	0.481	0.503	1	Slc25a3	7
0.0055225	0.265806	0.241	0.112	1	4833438C02Rik	7
0.0042039	0.265708	0.114	0.039	1	Uqcc3	7
0.00647118	0.26565	0.241	0.18	1	Os9	7
0.00812094	0.265314	0.241	0.199	1	Higd2a	7
0.0338104	0.265207	0.19	0.131	1	Lsm8	7
0.00293236	0.265171	0.139	0.043	1	Mylip	7
0.0782138	0.264949	0.266	0.236	1	Gm2a	7
0.00142061	0.264942	0.101	0.025	1	Sec31a	7
0.000455735	0.264746	0.139	0.033	1	Scnm1	7
0.00802572	0.264627	0.329	0.292	1	Zfp106	7
0.00784714	0.264552	0.127	0.064	1	Elovl1	7
0.00111148	0.264533	0.114	0.035	1	Rnf187	7
0.00619301	0.264301	0.215	0.112	1	Ndufa8	7
0.000728782	0.264222	0.114	0.068	1	Dnajc14	7
0.00110588	0.263979	0.152	0.044	1	Glrx2	7
0.00212983	0.263573	0.114	0.035	1	Rad23b	7
0.00491987	0.263204	0.101	0.03	1	Chtop	7
0.0119439	0.262993	0.215	0.128	1	Psmd11	7
0.00218375	0.262237	0.101	0.03	1	Itm2c	7
9.91795e-05	0.262131	0.101	0.014	1	Mrpl21	7
0.0152325	0.262051	0.19	0.169	1	Dapp1	7
0.00101596	0.262028	0.127	0.04	1	Pin1	7
0.000924879	0.261526	0.101	0.041	1	Ctbs	7
0.0106863	0.261129	0.114	0.063	1	Rhoq	7
0.00101629	0.261095	0.114	0.036	1	C1d	7
5.87421e-05	0.261023	0.114	0.018	1	Gtf2f2	7
0.0150822	0.261013	0.215	0.157	1	Frg1	7
0.0153031	0.260805	0.241	0.166	1	Psma1	7
0.0024524	0.260666	0.114	0.045	1	Dcaf8	7
9.17194e-05	0.260373	0.57	0.565	1	Grb2	7
0.0161411	0.260284	0.19	0.115	1	Fam110a	7
9.35115e-05	0.259776	0.215	0.213	1	Iscu	7
0.00180692	0.259637	0.127	0.033	1	Mrps15	7
0.00380024	0.259575	0.127	0.038	1	Dnajc15	7
0.0292424	0.25917	0.304	0.231	1	Slc16a6	7
0.00103097	0.259018	0.101	0.024	1	Ano6	7
0.00216158	0.259008	0.165	0.108	1	Ublcp1	7
0.0142514	0.258646	0.165	0.085	1	Smim4	7
0.000901281	0.258132	0.127	0.054	1	Mapkap1	7
0.00616584	0.258105	0.127	0.09	1	Egr3	7
0.000433499	0.257924	0.418	0.402	1	Hnrnpa3	7
0.0134525	0.257605	0.19	0.109	1	Nsf	7
0.0127678	0.257363	0.19	0.134	1	Prpf38b	7
0.00518864	0.257304	0.165	0.097	1	Lamtor5	7
0.00548767	0.257045	0.152	0.076	1	Micos13	7
0.0025306	0.256802	0.203	0.146	1	Hnrnpul1	7
0.0012487	0.256288	0.114	0.027	1	E230013L22Rik	7
0.00786784	0.256163	0.139	0.062	1	Rbbp4	7
0.0107227	0.256006	0.101	0.042	1	Tmed3	7
0.0296903	0.255753	0.139	0.082	1	Aup1	7
0.0113834	0.255602	0.139	0.073	1	Rassf2	7
0.0130715	0.255547	0.266	0.208	1	Raly	7
0.00493494	0.255297	0.139	0.059	1	Sar1b	7
0.0168434	0.255274	0.215	0.167	1	Prpf40a	7
0.000874197	0.254815	0.241	0.202	1	Med7	7
0.00614987	0.25451	0.165	0.113	1	Eloa	7
0.05787	0.254316	0.127	0.062	1	Id3	7
0.00673159	0.254279	0.152	0.126	1	Rab43	7
0.00366884	0.25426	0.101	0.027	1	Ddx54	7
0.00713931	0.254168	0.127	0.059	1	Hmces	7
0.0226664	0.253941	0.165	0.08	1	Cdc5l	7
0.00285742	0.253697	0.215	0.148	1	Dda1	7
0.00189395	0.253622	0.101	0.022	1	Ythdf2	7
0.005733	0.253393	0.127	0.067	1	Rab10os	7
0.0160267	0.253134	0.139	0.062	1	Zc3h13	7
0.0150001	0.252831	0.405	0.381	1	Mpeg1	7
0.012926	0.252364	0.203	0.12	1	Kdelr1	7
0.00144377	0.252221	0.114	0.063	1	Napg	7
0.00443104	0.252061	0.608	0.596	1	Neurl3	7
0.000275561	0.251857	0.127	0.028	1	Pmpca	7
0.00037822	0.251764	0.114	0.023	1	Larp1	7
0.00683006	0.251627	0.114	0.06	1	Snhg8	7
0.0138429	0.251109	0.177	0.09	1	N4bp2l1	7
0.00303288	0.250681	0.101	0.048	1	Fam192a	7

## Sheet: 8
p_val	avg_logFC	pct.1	pct.2	p_val_adj	gene	cluster		source	term_name	term_id	highlighted	adjusted_p_value	negative_log10_of_adjusted_p_value	term_size	query_size	intersection_size	effective_domain_size	intersections
6.78277e-114	3.58727	0.98	0.064	1.34333e-109	Camp	8		GO:MF	calcium-dependent protein binding	GO:0048306	TRUE	0.000264064	3.57829	88	47	5	25063	CD177,ANXA1,S100A8,PDCD6,S100A9
5.54962e-87	3.3616	1	0.295	1.0991e-82	Ngp	8		GO:MF	molecular function regulator activity	GO:0098772	TRUE	0.00132661	2.87726	2074	47	15	25063	NGP,LTF,ANXA1,SERPINB1A,PGLYRP1,ARHGDIB,LY6C2,CCND3,WFDC21,RETNLG,RASA2,FLNA,GPI1,LAMTOR4,MMP25
2.74989e-89	2.95218	0.92	0.064	5.44616e-85	Ltf	8		GO:MF	calcium ion binding	GO:0005509	TRUE	0.0209667	1.67847	719	47	8	25063	ANXA1,MMP8,TKT,S100A8,PDCD6,MYL6,ACTN1,S100A9
1.00216e-41	1.55981	0.96	0.261	1.98478e-37	Cd177	8		GO:MF	protein binding	GO:0005515	FALSE	0.0297671	1.52626	10460	47	33	25063	CD177,CHIL3,ANXA1,MMP8,SERPINB1A,ALDH2,PGLYRP1,ARHGDIB,LY6C2,TKT,CCND3,SYNE1,S100A8,PDCD6,LYZ2,MMP9,ITGB2L,RETNLG,CDADC1,RFLNB,CYBB,PROK2,MYL6,ACTN1,ACVRL1,VIM,FLNA,S100A9,GPI1,CKAP4,PDIA3,SETD1B,DSTN
1.4545e-33	1.50079	0.98	0.602	2.88063e-29	Ifitm6	8		GO:MF	enzyme regulator activity	GO:0030234	FALSE	0.0391507	1.40726	1264	47	10	25063	NGP,LTF,ANXA1,SERPINB1A,ARHGDIB,CCND3,WFDC21,RASA2,LAMTOR4,MMP25
6.50733e-23	1.30259	0.94	0.355	1.28878e-18	Chil3	8		GO:BP	regulation of multicellular organismal process	GO:0051239	TRUE	6.63807e-06	5.17796	3165	48	22	26944	CAMP,NGP,LTF,CHIL3,ANXA1,MMP8,SERPINB1A,PGLYRP1,ARHGDIB,SYNE1,PDCD6,MMP9,ITGB2L,RFLNB,CYBB,PROK2,MAPK13,ACVRL1,VIM,FLNA,S100A9,GPI1
1.3114e-31	1.29017	0.96	0.525	2.59722e-27	Anxa1	8		GO:BP	defense response	GO:0006952	TRUE	1.00651e-05	4.99718	1812	48	17	26944	CAMP,NGP,LTF,CD177,IFITM6,CHIL3,ANXA1,MMP8,SERPINB1A,PGLYRP1,S100A8,LYZ2,WFDC21,ITGB2L,CYBB,VIM,S100A9
1.44452e-22	1.23969	0.96	0.49	2.86087e-18	Mmp8	8		GO:BP	response to oxygen-containing compound	GO:1901700	TRUE	1.07289e-05	4.96945	2077	48	18	26944	CAMP,LTF,ANXA1,MMP8,ALDH2,LY6C2,CCND3,S100A8,WFDC21,MMP9,CYBB,MAPK13,VIM,FLNA,S100A9,GPI1,PDIA3,LAMTOR4
3.03147e-34	1.23654	0.8	0.084	6.00383e-30	Serpinb1a	8		GO:BP	response to stress	GO:0006950	FALSE	1.19961e-05	4.92096	3936	48	24	26944	CAMP,NGP,LTF,CD177,IFITM6,CHIL3,ANXA1,MMP8,SERPINB1A,PGLYRP1,S100A8,PDCD6,LYZ2,WFDC21,MMP9,ITGB2L,CYBB,MAPK13,ACVRL1,VIM,FLNA,S100A9,GPI1,PDIA3
1.17232e-30	1.19042	0.9	0.24	2.32178e-26	Aldh2	8		GO:BP	response to external stimulus	GO:0009605	FALSE	2.05127e-05	4.68798	3042	48	21	26944	CAMP,LTF,CD177,IFITM6,ANXA1,MMP8,SERPINB1A,PGLYRP1,S100A8,LYZ2,WFDC21,MMP9,ITGB2L,RETNLG,CYBB,PROK2,VIM,FLNA,S100A9,GPI1,PDIA3
7.39093e-28	1.15206	1	0.693	1.46377e-23	Pglyrp1	8		GO:BP	angiogenesis	GO:0001525	FALSE	7.32606e-05	4.13513	561	48	10	26944	CAMP,NGP,ANXA1,PDCD6,MMP9,ITGB2L,CYBB,PROK2,ACVRL1,FLNA
3.24811e-41	1.11368	0.84	0.076	6.43289e-37	Adpgk	8		GO:BP	innate immune response	GO:0045087	FALSE	0.000162656	3.78873	977	48	12	26944	CAMP,LTF,CD177,IFITM6,ANXA1,SERPINB1A,PGLYRP1,S100A8,WFDC21,CYBB,VIM,S100A9
1.78834e-33	1.10116	0.98	0.677	3.54181e-29	Arhgdib	8		GO:BP	immune system process	GO:0002376	FALSE	0.000206209	3.68569	2819	48	19	26944	CAMP,LTF,CD177,IFITM6,ANXA1,MMP8,SERPINB1A,PGLYRP1,CCND3,S100A8,WFDC21,MMP9,ITGB2L,RETNLG,CYBB,VIM,S100A9,GPI1,PDIA3
1.21401e-24	1.09098	0.98	0.396	2.40434e-20	Ly6c2	8		GO:BP	anatomical structure formation involved in morphogenesis	GO:0048646	FALSE	0.000225584	3.64669	1221	48	13	26944	CAMP,NGP,ANXA1,MMP8,PDCD6,MMP9,ITGB2L,CYBB,PROK2,ACTN1,ACVRL1,FLNA,GPI1
1.2949e-24	1.03405	0.94	0.305	2.56455e-20	Tkt	8		GO:BP	myeloid leukocyte migration	GO:0097529	FALSE	0.00031654	3.49957	236	48	7	26944	CD177,ANXA1,S100A8,MMP9,ITGB2L,RETNLG,S100A9
2.67548e-21	0.992813	0.88	0.299	5.29878e-17	Ccnd3	8		GO:BP	blood vessel morphogenesis	GO:0048514	FALSE	0.000317542	3.4982	657	48	10	26944	CAMP,NGP,ANXA1,PDCD6,MMP9,ITGB2L,CYBB,PROK2,ACVRL1,FLNA
1.52287e-23	0.927504	0.88	0.204	3.01605e-19	Syne1	8		GO:BP	locomotion	GO:0040011	FALSE	0.000364489	3.43832	1273	48	13	26944	ANXA1,ARHGDIB,S100A8,PDCD6,MMP9,ITGB2L,RETNLG,PROK2,ACVRL1,VIM,FLNA,S100A9,GPI1
5.59353e-15	0.898947	1	0.995	1.1078e-10	S100a8	8		GO:BP	defense response to other organism	GO:0098542	FALSE	0.000391628	3.40713	1281	48	13	26944	CAMP,LTF,CD177,IFITM6,ANXA1,SERPINB1A,PGLYRP1,S100A8,LYZ2,WFDC21,CYBB,VIM,S100A9
1.11322e-14	0.886615	0.84	0.31	2.20474e-10	Pdcd6	8		GO:BP	positive regulation of multicellular organismal process	GO:0051240	FALSE	0.000491393	3.30857	1804	48	15	26944	CAMP,LTF,CHIL3,ANXA1,MMP8,PDCD6,MMP9,ITGB2L,CYBB,PROK2,MAPK13,ACVRL1,VIM,FLNA,S100A9
1.28721e-13	0.88058	0.98	0.81	2.54932e-09	Lyz2	8		GO:BP	defense response to symbiont	GO:0140546	FALSE	0.000933187	3.03003	1150	48	12	26944	CAMP,LTF,CD177,IFITM6,ANXA1,SERPINB1A,PGLYRP1,S100A8,WFDC21,CYBB,VIM,S100A9
2.73264e-14	0.87531	0.76	0.252	5.41198e-10	Hmgn2	8		GO:BP	neutrophil activation	GO:0042119	TRUE	0.00112316	2.94956	39	48	4	26944	CAMP,CD177,ANXA1,ITGB2L
6.69319e-18	0.859318	0.98	0.83	1.32559e-13	Wfdc21	8		GO:BP	blood vessel development	GO:0001568	FALSE	0.00121677	2.91479	761	48	10	26944	CAMP,NGP,ANXA1,PDCD6,MMP9,ITGB2L,CYBB,PROK2,ACVRL1,FLNA
5.85777e-17	0.850675	0.98	0.647	1.16013e-12	Mmp9	8		GO:BP	positive regulation of angiogenesis	GO:0045766	FALSE	0.00124112	2.90619	179	48	6	26944	CAMP,PDCD6,MMP9,ITGB2L,CYBB,ACVRL1
5.05064e-30	0.825923	0.72	0.071	1.00028e-25	Itgb2l	8		GO:BP	positive regulation of vasculature development	GO:1904018	FALSE	0.00132438	2.87799	181	48	6	26944	CAMP,PDCD6,MMP9,ITGB2L,CYBB,ACVRL1
3.02965e-10	0.80485	1	0.893	6.00022e-06	Retnlg	8		GO:BP	vasculature development	GO:0001944	FALSE	0.00176602	2.75301	793	48	10	26944	CAMP,NGP,ANXA1,PDCD6,MMP9,ITGB2L,CYBB,PROK2,ACVRL1,FLNA
2.14082e-19	0.798409	0.58	0.075	4.23989e-15	Cdadc1	8		GO:BP	ameboidal-type cell migration	GO:0001667	TRUE	0.00180392	2.74378	446	48	8	26944	ANXA1,ARHGDIB,PDCD6,MMP9,ITGB2L,ACVRL1,S100A9,GPI1
4.19944e-20	0.798386	0.66	0.102	8.31699e-16	Ceacam10	8		GO:BP	regulation of angiogenesis	GO:0045765	FALSE	0.00181322	2.74155	306	48	7	26944	CAMP,NGP,PDCD6,MMP9,ITGB2L,CYBB,ACVRL1
1.17509e-19	0.792748	0.72	0.138	2.32726e-15	Rflnb	8		GO:BP	regulation of vasculature development	GO:1901342	FALSE	0.00206338	2.68542	312	48	7	26944	CAMP,NGP,PDCD6,MMP9,ITGB2L,CYBB,ACVRL1
3.4969e-19	0.789188	0.98	0.383	6.92562e-15	R3hdm4	8		GO:BP	inflammatory response	GO:0006954	FALSE	0.00216178	2.66519	811	48	10	26944	CAMP,CHIL3,ANXA1,MMP8,SERPINB1A,PGLYRP1,S100A8,ITGB2L,CYBB,S100A9
4.4806e-17	0.786249	0.84	0.253	8.87384e-13	Cybb	8		GO:BP	epithelial cell migration	GO:0010631	FALSE	0.00224574	2.64864	316	48	7	26944	ANXA1,PDCD6,MMP9,ITGB2L,ACVRL1,S100A9,GPI1
8.58154e-16	0.776385	0.84	0.281	1.69957e-11	Rasa2	8		GO:BP	cellular response to oxygen-containing compound	GO:1901701	FALSE	0.00228421	2.64126	1497	48	13	26944	CAMP,LTF,ANXA1,MMP8,ALDH2,LY6C2,MMP9,CYBB,MAPK13,VIM,FLNA,PDIA3,LAMTOR4
1.47196e-11	0.750274	0.7	0.228	2.91521e-07	Prok2	8		GO:BP	cell motility	GO:0048870	FALSE	0.00230803	2.63676	1760	48	14	26944	CD177,ANXA1,ARHGDIB,S100A8,PDCD6,MMP9,ITGB2L,RETNLG,ACVRL1,VIM,FLNA,S100A9,GPI1,DSTN
9.08212e-24	0.737414	0.86	0.186	1.79871e-19	Mapk13	8		GO:BP	epithelium migration	GO:0090132	FALSE	0.00239121	2.62138	319	48	7	26944	ANXA1,PDCD6,MMP9,ITGB2L,ACVRL1,S100A9,GPI1
2.84224e-17	0.733571	0.9	0.309	5.62905e-13	Emp3	8		GO:BP	apoptotic process	GO:0006915	TRUE	0.0024951	2.60291	2050	48	15	26944	LTF,ANXA1,ALDH2,PGLYRP1,SYNE1,S100A8,PDCD6,MMP9,PROK2,EMP3,FLNA,DEGS1,S100A9,GPI1,PDIA3
2.2553e-19	0.719429	0.98	0.855	4.46663e-15	Myl6	8		GO:BP	response to other organism	GO:0051707	FALSE	0.00260397	2.58436	1778	48	14	26944	CAMP,LTF,CD177,IFITM6,ANXA1,MMP8,SERPINB1A,PGLYRP1,S100A8,LYZ2,WFDC21,CYBB,VIM,S100A9
6.04736e-15	0.715216	0.88	0.329	1.19768e-10	Actn1	8		GO:BP	granulocyte activation	GO:0036230	FALSE	0.00262599	2.58071	48	48	4	26944	CAMP,CD177,ANXA1,ITGB2L
1.36377e-13	0.713948	0.62	0.143	2.70094e-09	Acvrl1	8		GO:BP	response to external biotic stimulus	GO:0043207	FALSE	0.00267419	2.57281	1782	48	14	26944	CAMP,LTF,CD177,IFITM6,ANXA1,MMP8,SERPINB1A,PGLYRP1,S100A8,LYZ2,WFDC21,CYBB,VIM,S100A9
2.85779e-13	0.706617	0.96	0.549	5.65985e-09	Vim	8		GO:BP	tissue migration	GO:0090130	FALSE	0.00270593	2.56768	325	48	7	26944	ANXA1,PDCD6,MMP9,ITGB2L,ACVRL1,S100A9,GPI1
7.70016e-17	0.698098	0.92	0.339	1.52502e-12	Flna	8		GO:BP	cell migration	GO:0016477	FALSE	0.00308652	2.51053	1538	48	13	26944	CD177,ANXA1,ARHGDIB,S100A8,PDCD6,MMP9,ITGB2L,RETNLG,ACVRL1,VIM,FLNA,S100A9,GPI1
2.45529e-13	0.663843	0.74	0.23	4.86269e-09	Degs1	8		GO:BP	response to biotic stimulus	GO:0009607	FALSE	0.00340906	2.46737	1819	48	14	26944	CAMP,LTF,CD177,IFITM6,ANXA1,MMP8,SERPINB1A,PGLYRP1,S100A8,LYZ2,WFDC21,CYBB,VIM,S100A9
1.06124e-14	0.659271	1	0.773	2.10178e-10	Serf2	8		GO:BP	cell death	GO:0008219	FALSE	0.00390915	2.40792	2125	48	15	26944	LTF,ANXA1,ALDH2,PGLYRP1,SYNE1,S100A8,PDCD6,MMP9,PROK2,EMP3,FLNA,DEGS1,S100A9,GPI1,PDIA3
3.6668e-09	0.649531	1	0.998	7.2621e-05	S100a9	8		GO:BP	programmed cell death	GO:0012501	FALSE	0.00390915	2.40792	2125	48	15	26944	LTF,ANXA1,ALDH2,PGLYRP1,SYNE1,S100A8,PDCD6,MMP9,PROK2,EMP3,FLNA,DEGS1,S100A9,GPI1,PDIA3
1.32931e-13	0.6477	0.96	0.509	2.63269e-09	Gpi1	8		GO:BP	anatomical structure morphogenesis	GO:0009653	FALSE	0.00437674	2.35885	2761	48	17	26944	CAMP,NGP,LTF,ANXA1,MMP8,SYNE1,PDCD6,MMP9,ITGB2L,RFLNB,CYBB,PROK2,ACTN1,ACVRL1,VIM,FLNA,GPI1
4.71536e-13	0.647436	0.66	0.175	9.33878e-09	Ckap4	8		GO:BP	response to organic substance	GO:0010033	FALSE	0.00442278	2.3543	3435	48	19	26944	CAMP,LTF,IFITM6,ANXA1,MMP8,ALDH2,LY6C2,CCND3,S100A8,WFDC21,MMP9,CYBB,MAPK13,VIM,FLNA,S100A9,GPI1,PDIA3,LAMTOR4
3.58749e-12	0.647426	0.58	0.137	7.10501e-08	Pdia3	8		GO:BP	leukocyte chemotaxis	GO:0030595	FALSE	0.00518491	2.28526	229	48	6	26944	ANXA1,S100A8,MMP9,ITGB2L,RETNLG,S100A9
2.9734e-09	0.644807	0.46	0.107	5.88881e-05	Krt83	8		GO:BP	endothelial cell migration	GO:0043542	FALSE	0.00545115	2.26351	231	48	6	26944	ANXA1,PDCD6,ITGB2L,ACVRL1,S100A9,GPI1
1.30373e-12	0.643159	0.64	0.168	2.58204e-08	Lamtor4	8		GO:BP	regulation of anatomical structure morphogenesis	GO:0022603	FALSE	0.00570111	2.24404	904	48	10	26944	CAMP,NGP,ANXA1,SYNE1,PDCD6,MMP9,ITGB2L,CYBB,ACVRL1,VIM
4.57461e-05	0.622711	0.18	0.026	0.906001	Setd1b	8		GO:BP	cellular response to chemical stimulus	GO:0070887	FALSE	0.00609262	2.2152	3162	48	18	26944	CAMP,LTF,IFITM6,ANXA1,MMP8,ALDH2,LY6C2,S100A8,MMP9,ITGB2L,RETNLG,CYBB,MAPK13,VIM,FLNA,S100A9,PDIA3,LAMTOR4
1.48157e-09	0.611869	0.9	0.496	2.93425e-05	Dstn	8		GO:BP	tube morphogenesis	GO:0035239	FALSE	0.00712085	2.14747	927	48	10	26944	CAMP,NGP,ANXA1,PDCD6,MMP9,ITGB2L,CYBB,PROK2,ACVRL1,FLNA
7.44252e-19	0.607342	0.8	0.204	1.47399e-14	Mmp25	8		GO:BP	response to lipid	GO:0033993	FALSE	0.00724539	2.13994	1155	48	11	26944	CAMP,LTF,ANXA1,MMP8,S100A8,WFDC21,CYBB,VIM,S100A9,GPI1,PDIA3
2.18788e-09	0.605382	0.86	0.435	4.3331e-05	H2afz	8		GO:BP	biological process involved in interspecies interaction between organisms	GO:0044419	FALSE	0.00724666	2.13986	1940	48	14	26944	CAMP,LTF,CD177,IFITM6,ANXA1,MMP8,SERPINB1A,PGLYRP1,S100A8,LYZ2,WFDC21,CYBB,VIM,S100A9
2.00058e-14	0.596453	0.76	0.229	3.96214e-10	Ndufb7	8		GO:BP	leukocyte migration	GO:0050900	FALSE	0.00732439	2.13523	378	48	7	26944	CD177,ANXA1,S100A8,MMP9,ITGB2L,RETNLG,S100A9
9.42795e-23	0.593944	0.44	0.02	1.86721e-18	Cep19	8		GO:BP	immune response	GO:0006955	FALSE	0.00746676	2.12687	1945	48	14	26944	CAMP,LTF,CD177,IFITM6,ANXA1,SERPINB1A,PGLYRP1,S100A8,WFDC21,ITGB2L,CYBB,VIM,S100A9,PDIA3
5.30618e-14	0.593315	1	0.884	1.05089e-09	Cyba	8		GO:BP	signal transduction	GO:0007165	TRUE	0.00988937	2.00483	6895	48	27	26944	LTF,CD177,IFITM6,ANXA1,MMP8,ALDH2,PGLYRP1,ARHGDIB,LY6C2,CCND3,SYNE1,S100A8,PDCD6,MMP9,ITGB2L,RETNLG,CYBB,RASA2,PROK2,MAPK13,ACVRL1,VIM,FLNA,S100A9,GPI1,PDIA3,LAMTOR4
1.75363e-11	0.588836	0.96	0.807	3.47306e-07	Sh3bgrl3	8		GO:BP	circulatory system development	GO:0072359	FALSE	0.01182	1.92738	1216	48	11	26944	CAMP,NGP,ANXA1,SYNE1,PDCD6,MMP9,ITGB2L,CYBB,PROK2,ACVRL1,FLNA
2.45354e-11	0.586468	0.94	0.518	4.85924e-07	Sri	8		GO:BP	granulocyte migration	GO:0097530	FALSE	0.0125406	1.90168	153	48	5	26944	CD177,ANXA1,S100A8,ITGB2L,S100A9
2.88703e-08	0.582888	0.9	0.556	0.000571777	Gpx1	8		GO:BP	organonitrogen compound metabolic process	GO:1901564	TRUE	0.0168	1.77469	5744	48	24	26944	CAMP,LTF,CHIL3,MMP8,SERPINB1A,ALDH2,PGLYRP1,ADPGK,TKT,CCND3,S100A8,PDCD6,MMP9,ITGB2L,CDADC1,MAPK13,ACVRL1,VIM,FLNA,DEGS1,S100A9,GPI1,PDIA3,MMP25
1.50057e-09	0.580809	0.88	0.451	2.97189e-05	Mgst1	8		GO:BP	tissue development	GO:0009888	FALSE	0.0203363	1.69173	2122	48	14	26944	LTF,ANXA1,MMP8,SYNE1,PDCD6,MMP9,RFLNB,PROK2,MYL6,ACVRL1,VIM,FLNA,GPI1,KRT83
2.32908e-13	0.575257	0.84	0.319	4.61274e-09	Atxn10	8		GO:BP	regulation of multicellular organismal development	GO:2000026	FALSE	0.0204115	1.69013	1550	48	12	26944	CAMP,NGP,LTF,ANXA1,PGLYRP1,PDCD6,MMP9,ITGB2L,RFLNB,CYBB,ACVRL1,VIM
1.95263e-10	0.567599	0.86	0.405	3.86717e-06	Fis1	8		GO:BP	regulation of cytokine production	GO:0001817	FALSE	0.0207797	1.68236	824	48	9	26944	CAMP,LTF,CHIL3,ANXA1,MMP8,SERPINB1A,PGLYRP1,CYBB,MAPK13
1.02999e-12	0.565873	0.56	0.124	2.03989e-08	Ndufv3	8		GO:BP	cytokine production	GO:0001816	FALSE	0.0220133	1.65732	830	48	9	26944	CAMP,LTF,CHIL3,ANXA1,MMP8,SERPINB1A,PGLYRP1,CYBB,MAPK13
1.50428e-11	0.565021	0.38	0.05	2.97923e-07	Fmo5	8		GO:BP	anatomical structure development	GO:0048856	FALSE	0.0221038	1.65553	6269	48	25	26944	CAMP,NGP,LTF,ANXA1,MMP8,PGLYRP1,ARHGDIB,SYNE1,S100A8,PDCD6,MMP9,ITGB2L,RFLNB,CYBB,PROK2,MYL6,ACTN1,ACVRL1,VIM,FLNA,DEGS1,S100A9,GPI1,KRT83,MMP25
1.10704e-14	0.558787	0.9	0.358	2.19249e-10	Cnn2	8		GO:BP	response to lipopolysaccharide	GO:0032496	FALSE	0.0230718	1.63692	451	48	7	26944	CAMP,LTF,MMP8,S100A8,WFDC21,VIM,S100A9
1.39628e-15	0.557832	0.8	0.252	2.76534e-11	Pnkp	8		GO:BP	leukocyte migration involved in inflammatory response	GO:0002523	FALSE	0.0242905	1.61456	27	48	3	26944	S100A8,ITGB2L,S100A9
1.80752e-05	0.555231	0.98	0.95	0.35798	S100a6	8		GO:BP	chemotaxis	GO:0006935	FALSE	0.0244218	1.61222	455	48	7	26944	ANXA1,S100A8,MMP9,ITGB2L,RETNLG,PROK2,S100A9
8.78838e-12	0.54926	0.94	0.484	1.74054e-07	Capg	8		GO:BP	taxis	GO:0042330	FALSE	0.025121	1.59996	457	48	7	26944	ANXA1,S100A8,MMP9,ITGB2L,RETNLG,PROK2,S100A9
3.96345e-16	0.547301	0.66	0.144	7.84962e-12	G6pdx	8		GO:BP	response to molecule of bacterial origin	GO:0002237	FALSE	0.0288708	1.53954	467	48	7	26944	CAMP,LTF,MMP8,S100A8,WFDC21,VIM,S100A9
1.19206e-12	0.545011	0.84	0.33	2.36088e-08	Cox6c	8		GO:BP	positive regulation of cell population proliferation	GO:0008284	TRUE	0.0309183	1.50978	1097	48	10	26944	CAMP,LTF,ANXA1,CCND3,SYNE1,PDCD6,MMP9,ACVRL1,VIM,FLNA
6.8681e-10	0.54236	0.58	0.224	1.36023e-05	Ppp3ca	8		GO:BP	antimicrobial humoral response	GO:0019730	FALSE	0.0322479	1.4915	186	48	5	26944	CAMP,LTF,PGLYRP1,WFDC21,S100A9
1.13764e-18	0.541272	0.84	0.244	2.25309e-14	Ndufa13	8		GO:BP	developmental process	GO:0032502	FALSE	0.0325108	1.48797	6854	48	26	26944	CAMP,NGP,LTF,ANXA1,MMP8,PGLYRP1,ARHGDIB,SYNE1,S100A8,PDCD6,WFDC21,MMP9,ITGB2L,RFLNB,CYBB,PROK2,MYL6,ACTN1,ACVRL1,VIM,FLNA,DEGS1,S100A9,GPI1,KRT83,MMP25
1.3725e-09	0.536489	0.98	0.871	2.71823e-05	Alox5ap	8		GO:BP	cell chemotaxis	GO:0060326	FALSE	0.0354443	1.45045	321	48	6	26944	ANXA1,S100A8,MMP9,ITGB2L,RETNLG,S100A9
3.88677e-12	0.534717	0.76	0.27	7.69776e-08	Ltb4r1	8		GO:BP	response to chemical	GO:0042221	FALSE	0.0355823	1.44877	5561	48	23	26944	CAMP,LTF,IFITM6,ANXA1,MMP8,ALDH2,LY6C2,CCND3,S100A8,PDCD6,WFDC21,MMP9,ITGB2L,RETNLG,CYBB,PROK2,MAPK13,VIM,FLNA,S100A9,GPI1,PDIA3,LAMTOR4
8.21227e-13	0.532934	0.64	0.175	1.62644e-08	Mettl9	8		GO:BP	regulation of apoptotic process	GO:0042981	FALSE	0.0399713	1.39825	1658	48	12	26944	LTF,ANXA1,ALDH2,SYNE1,S100A8,MMP9,PROK2,FLNA,DEGS1,S100A9,GPI1,PDIA3
1.96586e-12	0.528931	0.42	0.064	3.89339e-08	Ccdc88c	8		GO:BP	positive regulation of cellular process	GO:0048522	FALSE	0.0457908	1.33922	6078	48	24	26944	CAMP,LTF,CD177,CHIL3,ANXA1,MMP8,CCND3,SYNE1,S100A8,PDCD6,MMP9,ITGB2L,CYBB,MAPK13,ACTN1,ACVRL1,VIM,FLNA,DEGS1,S100A9,GPI1,PDIA3,LAMTOR4,DSTN
7.54313e-13	0.525523	0.66	0.185	1.49392e-08	Txndc17	8		GO:BP	response to stimulus	GO:0050896	FALSE	0.0457927	1.3392	10506	48	33	26944	CAMP,NGP,LTF,CD177,IFITM6,CHIL3,ANXA1,MMP8,SERPINB1A,ALDH2,PGLYRP1,ARHGDIB,LY6C2,CCND3,SYNE1,S100A8,PDCD6,LYZ2,WFDC21,MMP9,ITGB2L,RETNLG,CYBB,RASA2,PROK2,MAPK13,ACVRL1,VIM,FLNA,S100A9,GPI1,PDIA3,LAMTOR4
9.99447e-13	0.523219	0.78	0.291	1.9794e-08	4932438A13Rik	8		GO:BP	disruption of cell in another organism	GO:0141061	FALSE	0.0475311	1.32302	99	48	4	26944	CAMP,LTF,PGLYRP1,LYZ2
2.60385e-09	0.522775	0.98	0.763	5.15693e-05	Lgals3	8		GO:BP	killing of cells of another organism	GO:0031640	TRUE	0.0475311	1.32302	99	48	4	26944	CAMP,LTF,PGLYRP1,LYZ2
8.30984e-13	0.522119	0.34	0.03	1.64576e-08	1700047M11Rik	8		GO:BP	signaling	GO:0023052	FALSE	0.0489049	1.31065	7472	48	27	26944	LTF,CD177,IFITM6,ANXA1,MMP8,ALDH2,PGLYRP1,ARHGDIB,LY6C2,CCND3,SYNE1,S100A8,PDCD6,MMP9,ITGB2L,RETNLG,CYBB,RASA2,PROK2,MAPK13,ACVRL1,VIM,FLNA,S100A9,GPI1,PDIA3,LAMTOR4
6.71229e-09	0.522085	0.98	0.635	0.000132937	Itgam	8		GO:BP	cell activation	GO:0001775	TRUE	0.049856	1.30228	1160	48	10	26944	CAMP,CD177,ANXA1,MMP8,PGLYRP1,CCND3,ITGB2L,ACVRL1,FLNA,PDIA3
2.19055e-12	0.521437	0.58	0.141	4.33839e-08	Pmvk	8		GO:BP	neutrophil aggregation	GO:0070488	TRUE	0.0499523	1.30144	5	48	2	26944	S100A8,S100A9
5.18021e-12	0.518661	0.78	0.29	1.02594e-07	Cdk11b	8		GO:CC	extracellular space	GO:0005615	TRUE	1.72617e-06	5.76292	1836	48	17	26995	CAMP,NGP,LTF,CHIL3,ANXA1,MMP8,SERPINB1A,PGLYRP1,S100A8,LYZ2,WFDC21,MMP9,RETNLG,S100A9,GPI1,PDIA3,MMP25
4.18857e-11	0.514454	0.8	0.331	8.29545e-07	Atp5f1	8		GO:CC	extracellular region	GO:0005576	FALSE	3.67506e-05	4.43474	2554	48	18	26995	CAMP,NGP,LTF,CHIL3,ANXA1,MMP8,SERPINB1A,PGLYRP1,S100A8,LYZ2,WFDC21,MMP9,RETNLG,PROK2,S100A9,GPI1,PDIA3,MMP25
1.08247e-13	0.508258	0.88	0.355	2.14384e-09	Lbr	8		GO:CC	cytoplasmic vesicle	GO:0031410	TRUE	0.000415885	3.38103	2077	48	15	26995	CAMP,NGP,LTF,CD177,CHIL3,ANXA1,SERPINB1A,PDCD6,LYZ2,ITGB2L,CYBB,ACTN1,VIM,PDIA3,LAMTOR4
4.47834e-11	0.504226	0.96	0.54	8.86935e-07	Pygl	8		GO:CC	intracellular vesicle	GO:0097708	FALSE	0.000426018	3.37057	2081	48	15	26995	CAMP,NGP,LTF,CD177,CHIL3,ANXA1,SERPINB1A,PDCD6,LYZ2,ITGB2L,CYBB,ACTN1,VIM,PDIA3,LAMTOR4
6.967e-13	0.495336	0.64	0.17	1.37982e-08	Mpc2	8		GO:CC	vesicle	GO:0031982	FALSE	0.000993987	3.00262	2228	48	15	26995	CAMP,NGP,LTF,CD177,CHIL3,ANXA1,SERPINB1A,PDCD6,LYZ2,ITGB2L,CYBB,ACTN1,VIM,PDIA3,LAMTOR4
1.356e-10	0.493292	0.68	0.238	2.68555e-06	Abracl	8		GO:CC	secretory granule	GO:0030141	TRUE	0.00592159	2.22756	494	48	7	26995	CAMP,LTF,CD177,LYZ2,ITGB2L,ACTN1,PDIA3
2.10813e-14	0.488388	0.78	0.265	4.17514e-10	Fosl1	8		GO:CC	rough endoplasmic reticulum lumen	GO:0048237	TRUE	0.0151041	1.8209	7	48	2	26995	CHIL3,LYZ2
8.63637e-13	0.486923	0.74	0.245	1.71043e-08	S100a13	8		GO:CC	endomembrane system	GO:0012505	FALSE	0.0157152	1.80368	4287	48	19	26995	CAMP,LTF,CD177,CHIL3,ANXA1,SERPINB1A,ADPGK,TKT,SYNE1,PDCD6,LYZ2,ITGB2L,CYBB,ACTN1,FLNA,DEGS1,CKAP4,PDIA3,LAMTOR4
0.00038751	0.48511	0.32	0.112	1	Zbtb11	8		GO:CC	rough endoplasmic reticulum	GO:0005791	FALSE	0.0433077	1.36344	62	48	3	26995	CHIL3,LYZ2,CKAP4
1.23327e-07	0.483651	0.76	0.374	0.0024425	Ppp2r5a	8		KEGG	Leukocyte transendothelial migration	KEGG:04670	FALSE	0.00131554	2.8809	118	27	5	9330	MMP9,ITGB2L,CYBB,MAPK13,ACTN1
4.91145e-06	0.483227	0.3	0.068	0.0972712	Far1	8		KEGG	IL-17 signaling pathway	KEGG:04657	FALSE	0.00932993	2.03012	93	27	4	9330	S100A8,MMP9,MAPK13,S100A9
1.60401e-09	0.481642	0.98	0.841	3.17674e-05	Arpc1b	8
2.2522e-09	0.481268	0.46	0.106	4.46048e-05	Slc25a24	8
3.38008e-10	0.477796	0.44	0.113	6.69425e-06	Atp8b4	8
2.82341e-07	0.475238	0.22	0.026	0.00559177	Tfdp1	8
1.00258e-11	0.471179	0.8	0.316	1.9856e-07	Atp5h	8
2.04254e-17	0.466595	0.72	0.181	4.04525e-13	Ndufb11	8
3.67086e-10	0.462904	0.54	0.165	7.27013e-06	Cers2	8
8.19969e-16	0.462195	1	0.5	1.62395e-11	Dgat1	8
2.06491e-07	0.46125	0.56	0.215	0.00408955	Nfe2	8
7.74103e-12	0.460383	0.46	0.086	1.53311e-07	Ciao2a	8
5.59196e-12	0.460336	0.44	0.075	1.10749e-07	Ranbp9	8
2.29015e-06	0.458425	0.3	0.063	0.0453564	Borcs8	8
6.13494e-09	0.455413	0.64	0.238	0.000121502	Mapk3	8
1.27991e-08	0.455198	0.82	0.403	0.000253487	Sec61b	8
4.28462e-16	0.455098	0.58	0.112	8.48569e-12	Tecr	8
8.5019e-13	0.453802	0.72	0.236	1.6838e-08	Limd2	8
3.31417e-10	0.442906	0.58	0.169	6.56372e-06	Ap2s1	8
1.65909e-08	0.441146	0.88	0.478	0.000328583	Kctd12	8
6.50206e-16	0.441128	0.42	0.04	1.28773e-11	Rab3d	8
2.88223e-08	0.439784	0.68	0.281	0.000570826	Capns1	8
1.43468e-07	0.436189	0.4	0.107	0.00284138	F5	8
3.34592e-12	0.435672	0.72	0.258	6.6266e-08	Smpdl3a	8
9.58519e-06	0.435634	0.36	0.104	0.189835	Clasp1	8
1.23753e-10	0.435222	0.5	0.119	2.45094e-06	Add3	8
5.47053e-11	0.434216	0.72	0.269	1.08344e-06	Ywhab	8
4.31746e-11	0.432662	0.8	0.333	8.55072e-07	Dhrs7	8
5.04453e-08	0.431993	1	0.998	0.000999068	Tmsb4x	8
2.66611e-12	0.429703	0.6	0.162	5.28022e-08	Cox7b	8
3.53685e-08	0.426869	0.8	0.395	0.000700473	Hsp90ab1	8
1.79943e-12	0.424724	0.52	0.11	3.56377e-08	Flot2	8
1.10118e-15	0.422679	0.58	0.122	2.18088e-11	Padi4	8
2.34751e-11	0.422322	0.38	0.056	4.64924e-07	Fam117b	8
4.13435e-12	0.421654	0.78	0.329	8.18808e-08	Npepps	8
1.14924e-06	0.421584	0.96	0.773	0.0227608	Tspo	8
5.33149e-16	0.419559	0.72	0.208	1.0559e-11	Hcfc1r1	8
6.03726e-12	0.41925	0.58	0.156	1.19568e-07	Scp2	8
1.34704e-16	0.414083	0.52	0.082	2.66782e-12	Tbcb	8
9.81563e-14	0.412704	0.36	0.031	1.94398e-09	Gpr27	8
6.67981e-07	0.412381	0.98	0.817	0.0132294	Coro1a	8
6.79367e-12	0.410741	0.82	0.341	1.34549e-07	Ppp1ca	8
2.43271e-09	0.409737	0.52	0.149	4.81798e-05	Aprt	8
6.48489e-11	0.406946	0.56	0.162	1.28433e-06	Hook3	8
6.62656e-12	0.406467	0.54	0.138	1.31239e-07	Plec	8
4.06124e-17	0.402946	0.38	0.027	8.04329e-13	Acpp	8
1.16431e-10	0.398792	0.48	0.116	2.30591e-06	Hist1h1e	8
4.19385e-11	0.398054	0.82	0.367	8.30592e-07	Pgd	8
6.64891e-07	0.397927	1	0.99	0.0131682	Actb	8
4.43737e-07	0.397908	0.84	0.472	0.00878822	Eif4g2	8
9.97929e-07	0.395217	0.98	0.755	0.019764	Itm2b	8
1.94709e-09	0.394195	0.74	0.326	3.85621e-05	Napsa	8
6.3109e-11	0.393049	0.52	0.137	1.24987e-06	Rinl	8
1.73582e-07	0.388151	0.56	0.23	0.00343778	Phf20l1	8
2.16094e-09	0.382775	0.92	0.507	4.27975e-05	Plp2	8
7.91986e-11	0.382076	0.6	0.186	1.56853e-06	Magoh	8
9.38614e-11	0.381875	0.62	0.228	1.85893e-06	Crispld2	8
4.27611e-07	0.376029	1	0.843	0.00846883	Calm1	8
2.17125e-09	0.375904	0.48	0.131	4.30015e-05	Abhd5	8
4.77572e-11	0.372433	0.38	0.062	9.45831e-07	Nucb2	8
7.7477e-11	0.372269	0.52	0.137	1.53443e-06	Aldh3b1	8
1.08713e-14	0.372263	0.48	0.089	2.15305e-10	Rab1b	8
2.75869e-10	0.371282	0.52	0.146	5.46359e-06	Hjurp	8
2.47226e-11	0.370997	0.48	0.106	4.89632e-07	Ech1	8
1.97509e-09	0.370505	0.44	0.112	3.91166e-05	Cyfip2	8
1.48781e-12	0.370245	0.34	0.033	2.9466e-08	Tinagl1	8
7.12309e-08	0.369997	0.72	0.341	0.00141073	Slc6a6	8
5.89511e-13	0.367858	0.84	0.37	1.16753e-08	Ndfip1	8
9.49372e-07	0.365131	0.92	0.59	0.0188023	Itgb2	8
4.53672e-09	0.361647	0.48	0.139	8.98498e-05	Stap1	8
1.8668e-07	0.361516	0.2	0.018	0.00369721	L1cam	8
1.49019e-12	0.360946	0.4	0.066	2.95131e-08	Cuedc2	8
9.23361e-12	0.360758	0.7	0.262	1.82872e-07	Rnf130	8
4.33062e-06	0.360331	0.98	0.876	0.0857679	Pfn1	8
7.6528e-09	0.357824	0.46	0.128	0.000151564	Pycard	8
1.59983e-06	0.3561	0.98	0.85	0.0316847	Sem1	8
2.08569e-14	0.354167	0.74	0.253	4.13071e-10	Mdh2	8
2.14321e-12	0.352242	0.36	0.042	4.24464e-08	Ethe1	8
1.70018e-07	0.351196	0.96	0.634	0.00336721	Ubl5	8
2.65089e-05	0.349488	0.42	0.168	0.525009	Hsp90b1	8
2.43571e-06	0.349128	1	0.934	0.0482392	Lcn2	8
7.09846e-10	0.348852	0.74	0.326	1.40585e-05	Pomp	8
6.78723e-06	0.347332	0.44	0.158	0.134421	Tuba1a	8
5.35118e-09	0.346658	0.42	0.106	0.00010598	Atp2c1	8
0.00146606	0.346121	0.3	0.129	1	Usp15	8
4.30685e-13	0.345727	0.62	0.185	8.52972e-09	Tle5	8
1.09635e-13	0.344696	0.66	0.213	2.17132e-09	Dhrs9	8
6.37006e-11	0.344253	0.42	0.089	1.26159e-06	Bloc1s1	8
1.92423e-09	0.344062	0.42	0.103	3.81093e-05	Anxa7	8
3.43934e-13	0.343754	0.62	0.185	6.81162e-09	Dbnl	8
2.68449e-11	0.342895	0.58	0.176	5.31663e-07	Ak2	8
1.69833e-10	0.342099	0.5	0.139	3.36353e-06	Tpr	8
1.39015e-08	0.341691	0.74	0.341	0.000275318	Anxa11	8
8.52701e-08	0.341282	0.92	0.564	0.00168877	Arpc4	8
8.1372e-10	0.33863	0.4	0.082	1.61157e-05	Pqlc3	8
8.45814e-07	0.337035	0.96	0.664	0.0167514	Prr13	8
1.21193e-10	0.336086	0.36	0.057	2.40022e-06	Ets1	8
5.14622e-09	0.335683	0.7	0.305	0.000101921	Tmem50a	8
1.84178e-11	0.335435	0.34	0.043	3.64765e-07	Hist1h4d	8
5.48129e-06	0.335349	0.34	0.094	0.108557	Tbca	8
0.00156903	0.335203	0.42	0.199	1	Trf	8
2.82842e-05	0.334911	0.98	0.817	0.560168	Anxa2	8
6.63071e-12	0.334444	0.8	0.341	1.31321e-07	Ly6g	8
4.20568e-06	0.334138	0.22	0.033	0.0832934	Pabpc1l	8
4.29905e-07	0.332905	0.8	0.432	0.00851427	Rab5if	8
1.12146e-07	0.331768	0.48	0.152	0.00222105	Cops9	8
7.77266e-07	0.331206	0.68	0.352	0.0153938	Ppia	8
1.58744e-07	0.330659	0.24	0.03	0.00314393	Fdps	8
1.1904e-11	0.32989	0.56	0.163	2.35758e-07	Rnf10	8
9.33787e-10	0.327935	0.54	0.17	1.84936e-05	Ndufa1	8
1.36575e-07	0.327029	0.24	0.034	0.00270486	Nhsl2	8
9.78795e-14	0.326277	0.3	0.02	1.9385e-09	Golim4	8
1.002e-13	0.323113	0.76	0.278	1.98446e-09	Xdh	8
1.09658e-12	0.323104	0.42	0.072	2.17177e-08	Rnaseh2c	8
0.000129105	0.320516	0.92	0.743	1	Oaz1	8
6.99665e-10	0.319473	0.64	0.239	1.38569e-05	Atp5j2	8
1.79617e-10	0.318226	0.52	0.159	3.55731e-06	Ppp1r15b	8
3.87068e-08	0.317283	0.36	0.085	0.000766589	Lrrk2	8
0.000100667	0.316132	0.98	0.789	1	Arpc5	8
6.87635e-11	0.31545	0.36	0.052	1.36186e-06	Cd55	8
9.00631e-06	0.314718	0.2	0.03	0.17837	Ctr9	8
2.73205e-08	0.313143	0.36	0.08	0.000541083	Gatad1	8
2.35919e-05	0.312733	1	0.925	0.467238	Gapdh	8
1.14519e-11	0.310932	0.42	0.085	2.26805e-07	Tcp11l2	8
5.38407e-06	0.310661	0.24	0.063	0.106631	Baz1b	8
3.421e-10	0.309868	0.92	0.495	6.77529e-06	Atp5e	8
2.47912e-12	0.309509	0.32	0.03	4.9099e-08	Eif4e3	8
1.17761e-07	0.309353	0.9	0.539	0.00233225	Actr2	8
7.26299e-12	0.30908	0.64	0.219	1.43844e-07	Pcmt1	8
1.01619e-06	0.306692	0.28	0.052	0.0201257	Tbc1d8	8
8.27254e-06	0.306577	0.36	0.124	0.163838	Prkag1	8
0.001629	0.30648	0.18	0.043	1	Plod3	8
4.91764e-08	0.305541	0.64	0.286	0.000973938	Svil	8
3.20261e-14	0.304952	0.34	0.028	6.34277e-10	Nxn	8
1.24157e-09	0.304867	0.42	0.115	2.45892e-05	Ndufb8	8
7.44625e-10	0.304526	0.42	0.098	1.47473e-05	Cd300lb	8
1.04755e-07	0.303312	0.5	0.187	0.00207467	Smim14	8
5.38339e-06	0.302648	0.66	0.339	0.106618	Ndufb1-ps	8
6.78242e-08	0.302327	0.52	0.202	0.00134326	Hmgcr	8
3.75517e-12	0.3021	0.76	0.307	7.43711e-08	Anxa3	8
3.23641e-12	0.301505	0.54	0.155	6.40971e-08	Arl2bp	8
3.1362e-10	0.301168	0.74	0.325	6.21124e-06	Calm3	8
1.19401e-12	0.300215	0.74	0.29	2.36474e-08	Ndufa2	8
2.87768e-10	0.299721	0.72	0.303	5.69924e-06	Wdr1	8
0.00403974	0.299104	0.16	0.039	1	Zmym2	8
2.69821e-10	0.298868	0.44	0.111	5.3438e-06	Rasgrp2	8
1.99446e-14	0.298569	0.42	0.062	3.95003e-10	Stk16	8
2.2414e-13	0.298325	0.62	0.189	4.43908e-09	Sec11c	8
0.000763701	0.2983	0.38	0.178	1	E330009J07Rik	8
9.92895e-07	0.297619	0.28	0.055	0.0196643	Rmc1	8
2.70671e-07	0.297299	0.66	0.312	0.00536063	Txnl1	8
0.000247725	0.297202	0.36	0.152	1	Prkcb	8
2.04116e-16	0.295819	0.84	0.32	4.04252e-12	Tma7	8
1.07879e-09	0.295056	0.74	0.335	2.13654e-05	Ap3s1	8
2.49346e-10	0.294896	0.36	0.067	4.9383e-06	Vcl	8
1.40386e-10	0.292181	0.58	0.206	2.78034e-06	Cebpz	8
4.24902e-13	0.291956	0.64	0.221	8.41518e-09	Ube2m	8
1.49333e-09	0.291881	0.54	0.195	2.95755e-05	Mindy1	8
7.49515e-12	0.291019	0.48	0.134	1.48441e-07	Atg101	8
1.92456e-08	0.290814	0.5	0.19	0.000381159	Rnf13	8
4.5957e-10	0.290049	0.84	0.419	9.10179e-06	Rab6a	8
2.58623e-10	0.289592	0.26	0.025	5.12203e-06	Lta4h	8
8.47318e-08	0.288791	0.76	0.395	0.00167811	Kdm7a	8
8.0962e-12	0.288155	0.38	0.064	1.60345e-07	Nin	8
1.05907e-06	0.286715	0.56	0.261	0.0209749	Atp5b	8
0.0133637	0.286312	0.2	0.081	1	Psme4	8
8.72652e-14	0.28532	0.38	0.055	1.72829e-09	Rbfa	8
0.0927518	0.2853	0.12	0.045	1	Runx3	8
0.00771895	0.285038	0.3	0.132	1	Glud1	8
1.26499e-08	0.284256	0.34	0.075	0.000250532	Cmah	8
0.000186581	0.283945	0.84	0.571	1	Rsrp1	8
2.46273e-07	0.283736	0.44	0.145	0.00487744	St3gal5	8
1.23186e-06	0.283444	0.74	0.41	0.024397	Tmed5	8
2.1882e-07	0.282952	0.6	0.253	0.00433374	Ppib	8
2.04828e-09	0.282515	0.46	0.132	4.05662e-05	Anxa5	8
2.44525e-09	0.282126	0.44	0.121	4.84281e-05	Dlst	8
0.00180526	0.280934	0.4	0.208	1	Usp25	8
1.37589e-05	0.278479	1	0.845	0.272494	Arpc2	8
3.04967e-07	0.278325	0.24	0.032	0.00603987	Mgst2	8
7.89942e-11	0.27768	0.52	0.154	1.56448e-06	9830107B12Rik	8
9.08701e-10	0.277599	0.28	0.035	1.79968e-05	Arhgef6	8
3.57594e-09	0.276028	0.72	0.337	7.08216e-05	Qsox1	8
0.022889	0.27532	0.22	0.09	1	Msmo1	8
9.49613e-09	0.274123	0.3	0.053	0.000188071	Atrn	8
4.27202e-10	0.273616	0.6	0.23	8.46073e-06	Sidt2	8
0.197426	0.27239	0.18	0.138	1	B430306N03Rik	8
2.06482e-10	0.271972	0.66	0.26	4.08937e-06	Cox6a1	8
1.93815e-10	0.2718	0.76	0.339	3.83852e-06	Atp5j	8
1.61654e-09	0.271679	0.16	0.005	3.20156e-05	Ldhc	8
4.93058e-10	0.27094	0.78	0.361	9.76501e-06	Cox7a2	8
1.43234e-09	0.270865	0.52	0.183	2.83675e-05	Triobp	8
4.85343e-13	0.269987	0.54	0.148	9.61222e-09	Srp9	8
9.35468e-07	0.269912	0.26	0.045	0.0185269	Mcu	8
7.38913e-08	0.269378	0.42	0.125	0.00146342	Adgrg3	8
0.000194007	0.269324	0.26	0.094	1	Thrap3	8
1.02556e-10	0.268885	0.84	0.422	2.03112e-06	Gnas	8
1.83174e-06	0.268516	0.96	0.666	0.0362776	Lrg1	8
1.51354e-07	0.267183	0.42	0.144	0.00299756	Stat4	8
1.57705e-13	0.267043	0.5	0.116	3.12335e-09	9530068E07Rik	8
0.000121834	0.266932	0.98	0.827	1	Hp	8
0.000479855	0.266561	0.14	0.022	1	Plcb2	8
9.39551e-07	0.266174	0.38	0.113	0.0186078	Appbp2	8
2.44563e-06	0.265896	0.24	0.046	0.0484357	Sik2	8
3.92585e-07	0.265653	0.34	0.083	0.00777514	Scrg1	8
6.41474e-05	0.265649	0.28	0.082	1	Dbi	8
1.51788e-08	0.26554	0.5	0.183	0.000300617	Rpl22l1	8
5.93977e-14	0.265272	0.6	0.18	1.17637e-09	Clec4a2	8
5.58609e-08	0.264585	0.98	0.655	0.00110633	Ldha	8
4.38754e-07	0.262702	0.36	0.109	0.00868953	Twf2	8
4.61173e-06	0.262414	0.92	0.613	0.0913354	Gpsm3	8
0.08826	0.262128	0.16	0.069	1	Gse1	8
1.40139e-10	0.262048	0.82	0.408	2.77545e-06	Atp11b	8
1.66838e-12	0.261391	0.84	0.383	3.30423e-08	Cdkn2d	8
2.61399e-06	0.261089	0.26	0.05	0.0517701	Zdhhc3	8
0.00265972	0.260768	0.16	0.037	1	Psmd6	8
2.96269e-13	0.260691	0.58	0.175	5.86762e-09	Stk4	8
1.20336e-06	0.260574	0.28	0.067	0.0238326	Grk6	8
2.13079e-08	0.260125	0.98	0.656	0.000422003	Ywhaz	8
3.94459e-05	0.259302	0.34	0.11	0.781226	Tnfaip6	8
4.70641e-07	0.259224	0.48	0.19	0.00932105	Fgfr1op2	8
1.48433e-06	0.258648	0.18	0.023	0.0293972	Guk1	8
1.39942e-07	0.258465	0.38	0.103	0.00277156	Dhrs1	8
1.09209e-06	0.258279	0.58	0.256	0.0216289	Ndufa3	8
8.11494e-06	0.256972	0.64	0.336	0.160716	Tmsb10	8
2.39477e-06	0.25659	0.38	0.124	0.0474284	Ggt1	8
1.5569e-06	0.255868	0.3	0.085	0.0308343	Prpf38a	8
3.08086e-15	0.255449	0.64	0.197	6.10164e-11	Vdac2	8
7.21441e-12	0.255264	0.9	0.457	1.42881e-07	Emb	8
1.138e-05	0.255099	0.72	0.408	0.22538	Cox7c	8
2.56333e-06	0.254059	0.22	0.041	0.0507667	Mrpl18	8
1.70339e-05	0.253532	0.34	0.116	0.337356	Vbp1	8
6.77386e-06	0.253071	0.64	0.354	0.134156	Cggbp1	8
6.81366e-05	0.253029	0.32	0.103	1	Tuba4a	8
1.6471e-06	0.251871	0.42	0.16	0.0326209	Hipk1	8
7.67994e-10	0.251821	0.5	0.155	1.52101e-05	Hk3	8
8.16175e-09	0.250036	0.4	0.11	0.000161643	Cpne3	8
