# Supplementary material for: Deciphering the preeclampsia-specific immune microenvironment and the role of pro-inflammatory macrophages at the maternal–fetal interface
Source: eLife journal article supplement (doi:10.7554/elife.100002), 2024-09-11
Supplement: fig7-data1 [file figure 7 B.xls]

## Sheet: SBP
IGF1+CD14+ cells (%)
NP	PE
73	70.4
60.2	60.15
55.85	65.42
61.68	65.53
58.92
60.33
38.04
36.8
39.5
41.82
53.58
44.56
IGF1R+CD4+ cells (%)
NP	PE
39.12	67.65
59.05	55.94
40.21	64.67
43.2	50.07
53.54
39.52
40.69
40.57
41.14
43.09
45.8
50.23
