# Supplementary material for: Deciphering the preeclampsia-specific immune microenvironment and the role of pro-inflammatory macrophages at the maternal–fetal interface
Source: eLife journal article supplement (doi:10.7554/elife.100002), 2024-09-11
Supplement: fig7-data1 [file figure 7 D.xls]

## Sheet: Frequencies
CD45RO+CCR7+ CD4+ T cells (%)
Control	NP	PE	PE+BMS
10.2	12.41	16.02	11.17
13.36	18.04	17.64	19.65
9.35	10.25	22.35	8.05
23.23	25.68	32.05	26.18
12.81	17.79	24.78	14.54
18.53	23.65	26.41	15.41
29.18	18.9	37.99	25.31
16.85	14.86	21.35	12.74
15.05	19.38	39.29	20.79
IGF1R+CD4+ cells (%)
Control	NP	PE	PE+BMS
7.34	16.57	26.3	10.97
7.23	10.81	21.99	14.94
6.04	17.05	27.53	24.63
12.45	16.33	26.85	22.56
11.35	15.98	28.84	17.57
12.87	10.87	28.56	11.04
13.58	16.06	23.27	8.61
12.41	20.08	22.82	21.14
11.83	17.29	24.64	12.55
19.56	24.33	21.52	16.9
