# Supplementary material for: Deciphering the preeclampsia-specific immune microenvironment and the role of pro-inflammatory macrophages at the maternal–fetal interface
Source: eLife journal article supplement (doi:10.7554/elife.100002), 2024-09-11
Supplement: fig7-data1 [file figure 7 G.xls]

## Sheet: SBP
	D10.5	D16.5		D10.5	D16.5		D10.5	D16.5		D10.5	D16.5		D10.5	D16.5
C1	103.667	101.667	LPS1	106.333	114.333	Anti-CD4-1	107	115.333	T-1	101	118.333	BMS-1	106.667	114
C2	106.333	105.667	LPS2	105	116.333	Anti-CD4-2	103	113.667	T-2	107.333	114.333	BMS-2	103.667	107.333
C3	104.333	100.667	LPS3	105.333	112.333	Anti-CD4-3	105.667	111.667	T-3	105.333	113.333	BMS-3	103.333	104
C4	107	103.333	LPS4	102.333	113	Anti-CD4-4	105.667	113.667	T-4	107	115	BMS-4	108	112.333
C5	104.333	107.333	LPS5	105.333	114.667	Anti-CD4-5	102	112.667	T-5	104	112	BMS-5	103	103
C6	105	106	LPS6	103.667	114	Anti-CD4-6	103.333	116	T-6	105	113.667	BMS-6	105.667	109.667
									T-7	102.333	115.667	BMS-7	106	108

## Sheet: UACR
C1	27.5303		LPS1	45.8512		Anti-CD4-1	44.9393		T-1	65.9439		BMS-1	32.7075
C2	31.6456		LPS2	67.9897		Anti-CD4-2	29.2388		T-2	55.1481		BMS-2	44.4979
C3	44.0019		LPS3	30.16		Anti-CD4-3	33.2518		T-3	32.6257		BMS-3	46.444
C4	27.2576		LPS4	39.2671		Anti-CD4-4	58.4237		T-4	53.1556		BMS-4	22.3676
C5	30.3663		LPS5	46.8249		Anti-CD4-5	59.123		T-5	48.769		BMS-5	36.9529
C6	17.7541		LPS6	56.2659		Anti-CD4-6	41.4329		T-6	52.6219		BMS-6	31.8595
									T-7	69.9522		BMS-7	37.6484
