# Supplementary material for: Deciphering the preeclampsia-specific immune microenvironment and the role of pro-inflammatory macrophages at the maternal–fetal interface
Source: eLife journal article supplement (doi:10.7554/elife.100002), 2024-09-11
Supplement: fig7-data1 [file figure 7 H.xls]

## Sheet: SBP
CD44+CD4+T cells (%)
Control	LPS	Anti-CD4+T	Anti-CD4+T+BMS
53.24	60.03	56.82	55.85
63.18	58.94	60.37	62.14
46.01	60.25	68.42	57.28
56.71	59.45	54.06	65.05
55.19	59.19	63.98	54.1
45.71	68.01	57.73	58.06
		62	61
CD44+CD4+IL-17A+ cells (%)
9.78	22.12	19.55	12.62
16.34	24.11	23.37	7.92
8.04	21.37	19.44	10.77
16.61	10.72	18.04	18.49
12.17	27.34	22.15	16.54
9.9	19.83	17.11	12.24
		24.1	17.89
