# Supplementary material for: Deciphering the preeclampsia-specific immune microenvironment and the role of pro-inflammatory macrophages at the maternal–fetal interface
Source: eLife. 2025 Mar 28;13:RP100002. doi: 10.7554/eLife.100002 (PMC11952753; doi:10.7554/eLife.100002)
Supplement: Figure 1—source data 1. [file elife-100002-fig1-data1.xls]

## Sheet: Sheet1
	Granulocytes	Macrophages	CD4+ T cells	CD8+ T cells	DC	γδTCR	MDSCs	B cells	NK cells	Undefined
NP	32.5253	25.2657	10.3221	8.32485	1.82754	1.234	0.180732	4.32422	12.3982	3.59742
PE	33.3223	24.7611	10.5668	7.53582	2.41573	0.973782	0.0951728	4.0276	12.2335	4.06816
GDM	31.3474	27.505	10.5501	8.17525	2.37404	0.943805	0.109053	4.20404	9.18999	5.60139
GDM&PE	28.1763	19.0435	14.1513	11.8209	2.62827	1.25754	0.156798	5.20042	12.5606	5.00449
